# Supplementary material for: Identification and Analysis of Estrogen Receptor α Promoting Tamoxifen Resistance-Related lncRNAs
Source: Biomed Res Int. 2020 Apr 28;2020:9031723. doi: 10.1155/2020/9031723 (PMC7204353; doi:10.1155/2020/9031723)
Supplement: Supplementary 1 — Table S1: ER binding peaks in MCF-7/TamR and MCF-7/TamR-E2 cells. [file 9031723.f1.xlsx]

## Sheet: MCF-7-TamR
# This file is generated by MACS version 1.4.2 20120305
# ARGUMENTS LIST:
# name = 176
# format = BAM
# ChIP-seq file = /mnt/g/data/gse86538/chip-seq/sam_bam/SRR4190176.sorted.bam
# control file = None
# effective genome size = 2.70e+09
# band width = 300
# model fold = 10,30
# pvalue cutoff = 1.00e-05
# Large dataset will be scaled towards smaller dataset.
# Range for calculating regional lambda is: 10000 bps
# tag size is determined as 45 bps
# total tags in treatment: 97289869
# tags after filtering in treatment: 21743968
# maximum duplicate tags at the same position in treatment = 1
# Redundant rate in treatment: 0.78
# d = 158
chr	start	end	length	summit	tags	#NAME?	fold_enrichment
chr1	567427	567733	307	153	19	113.22	14.93
chr1	569771	570211	441	154	19	88.41	14.15
chr1	1008883	1009740	858	330	142	911.79	37.02
chr1	1014800	1015327	528	193	26	128.4	16.5
chr1	1553812	1554159	348	190	14	65.38	8.64
chr1	1608119	1608308	190	95	17	202.49	13.36
chr1	1652631	1653073	443	215	27	155.1	16.5
chr1	1724866	1725302	437	217	49	364.2	27.43
chr1	2282199	2282546	348	191	20	114.68	14.15
chr1	2615265	2615920	656	364	22	79.74	10.22
chr1	3254631	3255185	555	383	26	123.46	18.86
chr1	3748793	3749259	467	216	14	50.06	9.43
chr1	5372901	5373427	527	208	46	277.26	17.72
chr1	5399594	5400030	437	235	14	53.42	7.07
chr1	6499307	6499796	490	227	21	95.68	13.36
chr1	7019604	7020020	417	180	57	446.56	31.65
chr1	7020450	7020917	468	318	21	81.64	7.52
chr1	7507751	7508367	617	304	321	2386.69	37.24
chr1	7600649	7601394	746	397	93	552.72	27.98
chr1	8254608	8254961	354	141	17	86.65	11.58
chr1	8257813	8258421	609	368	48	231.15	18.01
chr1	8319052	8319590	539	388	19	74.21	9.43
chr1	8451193	8451669	477	258	28	146.37	17.26
chr1	9362943	9363662	720	435	38	189.91	20.43
chr1	9385721	9386513	793	407	37	168.15	20.43
chr1	9922804	9923363	560	354	19	71.58	12.57
chr1	10010201	10011091	891	478	75	409.35	33.12
chr1	10078534	10078999	466	282	21	99.68	13.36
chr1	10812386	10812951	566	241	101	708.84	31.22
chr1	11327812	11328245	434	140	22	113.63	14.93
chr1	11352655	11353150	496	342	18	72.97	13.36
chr1	11434229	11434876	648	403	108	723.98	33.95
chr1	12538221	12538717	497	225	16	59.42	9.43
chr1	12545526	12546178	653	365	34	102.22	9.95
chr1	12546344	12547056	713	305	67	316.58	21.68
chr1	12588385	12588851	467	337	15	54.79	6.1
chr1	12609537	12610362	826	275	162	1028.34	32.81
chr1	12660193	12660889	697	329	114	750.03	28.88
chr1	13904090	13904729	640	228	41	234.2	21.22
chr1	14868959	14869867	909	353	47	213.44	18.91
chr1	15240243	15240781	539	286	98	743.62	34.74
chr1	15303595	15304275	681	392	142	921.21	27.63
chr1	15351793	15352605	813	410	39	158.13	16.16
chr1	15374752	15375702	951	490	127	684.21	25.99
chr1	15611352	15611862	511	308	35	206.04	23.36
chr1	15789579	15790122	544	174	26	125.44	14.15
chr1	16126455	16126967	513	232	17	64.06	9.43
chr1	16891616	16893967	2352	1099	158	298.16	7.91
chr1	16934441	16935455	1015	514	159	633.41	23.76
chr1	17035028	17035695	668	336	60	319.85	23.21
chr1	17356042	17356474	433	145	14	53.89	9.43
chr1	17563735	17564489	755	349	362	2466.06	38.88
chr1	17577104	17577588	485	221	24	120.24	14.15
chr1	17594793	17595232	440	291	15	53.07	7.86
chr1	17630849	17631449	601	378	22	86.66	11.79
chr1	17641046	17641963	918	427	205	1212.66	36.77
chr1	17846626	17847482	857	569	189	1202.11	37.44
chr1	17855873	17856346	474	239	41	263.13	24.34
chr1	17926190	17926640	451	123	18	79.34	11.79
chr1	18956021	18956600	580	247	20	75.77	11
chr1	19333961	19334357	397	262	13	51.6	8.64
chr1	19680949	19681485	537	293	22	95.78	12.57
chr1	19683098	19683623	526	149	21	90.1	14.15
chr1	19752063	19752738	676	420	39	187.92	17.89
chr1	19753701	19754067	367	156	21	106.47	12.79
chr1	19908682	19909214	533	236	18	68.24	11
chr1	19922839	19923632	794	509	180	1152.34	40.25
chr1	19946203	19946683	481	284	18	75.01	12.57
chr1	20683255	20684144	890	722	99	529.66	20.36
chr1	20931115	20931604	490	178	45	319.92	27.51
chr1	21111191	21111588	398	225	13	51.48	8.64
chr1	21306493	21306815	323	167	14	69.42	10.22
chr1	21568137	21568736	600	214	18	60.67	8.64
chr1	21650808	21651370	563	157	19	71.21	7.86
chr1	22102410	22103026	617	314	29	136.18	15.72
chr1	22309367	22309656	290	145	13	70.62	10.22
chr1	22582183	22582638	456	220	19	85.58	10.94
chr1	22586225	22586797	573	152	26	120.32	14.15
chr1	22674919	22675343	425	154	14	54.85	7.86
chr1	22739052	22739780	729	174	45	247.71	16.41
chr1	22799033	22799645	613	219	68	402.77	22.1
chr1	22952145	22953024	880	444	122	710.7	39.76
chr1	23449701	23450366	666	348	36	184.13	24.36
chr1	24896924	24897378	455	155	41	279.2	25.02
chr1	24973412	24973868	457	300	18	78.44	12.57
chr1	25096006	25096796	791	448	72	326.64	23.52
chr1	25559669	25560035	367	151	15	69.92	11
chr1	25894647	25895289	643	300	20	68.44	7.86
chr1	26034765	26035381	617	215	32	160.52	21.22
chr1	26083475	26084011	537	313	69	466.6	25.21
chr1	27866673	27867130	458	308	17	67.01	8.1
chr1	27868344	27869097	754	390	36	156.81	16
chr1	27971497	27972005	509	153	26	132.06	11.79
chr1	28846512	28847247	736	374	33	146.87	14.93
chr1	29553999	29554641	643	195	28	124.02	12.57
chr1	30775765	30776304	540	390	30	147.97	17.07
chr1	30805840	30806309	470	191	28	157.68	18.08
chr1	30817966	30818889	924	483	81	377.07	26.79
chr1	30870630	30871471	842	415	79	377.7	23.18
chr1	30884969	30885561	593	231	24	102.02	8.64
chr1	30934297	30935208	912	433	109	591.16	30.8
chr1	31659408	31659868	461	207	15	50.71	8.64
chr1	31841379	31842235	857	424	64	321.09	23.73
chr1	31970485	31970762	278	139	13	70.62	10.22
chr1	32308488	32308851	364	152	20	111.11	14.15
chr1	32798357	32798786	430	279	27	158.29	16.5
chr1	34125968	34126683	716	257	65	388.66	31.65
chr1	34412187	34413046	860	387	80	293.42	20.54
chr1	34414243	34414956	714	248	64	219.55	15.51
chr1	35253882	35254204	323	149	17	93.99	12.57
chr1	35290996	35291662	667	447	77	456	25.32
chr1	35308752	35309644	893	474	99	536.44	23.96
chr1	36669545	36670032	488	275	66	494.67	34.69
chr1	36795200	36795884	685	309	97	616.03	30.97
chr1	36802170	36802987	818	415	44	220.29	23.58
chr1	37503995	37504619	625	477	28	126.99	11
chr1	38078471	38079134	664	264	30	135.21	17.19
chr1	38258793	38259329	537	358	91	698.06	38.39
chr1	38588877	38589619	743	569	42	219.07	13.36
chr1	38880780	38881251	472	331	19	83.53	11.79
chr1	38887185	38887662	478	297	21	97.65	11.79
chr1	39608325	39608801	477	327	15	55.28	7.86
chr1	39633459	39634015	557	211	23	100.12	14.93
chr1	39720816	39721433	618	333	31	152.08	18.08
chr1	39780937	39781415	479	181	15	52.16	6.7
chr1	41269661	41270045	385	156	16	74.62	10.22
chr1	41364952	41365501	550	240	19	72.81	7.86
chr1	41389052	41389797	746	457	116	711.77	35.55
chr1	41601149	41601513	365	213	13	55.68	8.64
chr1	41876035	41876501	467	288	16	63.04	8.64
chr1	42175772	42176483	712	286	51	246.33	22.09
chr1	42185007	42185617	611	418	62	398.97	29.78
chr1	42255067	42256128	1062	504	173	960.78	30.34
chr1	42325877	42326299	423	175	16	68.91	7.86
chr1	42331725	42332543	819	384	87	363.78	20.87
chr1	42333641	42334445	805	384	48	113.84	11.45
chr1	43403460	43403805	346	175	15	73.33	10.22
chr1	43438924	43439380	457	245	40	278.82	25.15
chr1	43457862	43458738	877	392	296	1692.14	37.14
chr1	43601571	43602005	435	279	16	66.89	10.94
chr1	44296230	44296973	744	456	114	663.99	28.17
chr1	44509347	44510268	922	587	55	237.64	12.66
chr1	44526560	44527210	651	263	40	221.52	20.32
chr1	44532595	44534028	1434	848	497	2249.74	33.91
chr1	44794206	44794549	344	134	14	66	10.22
chr1	44834243	44834758	516	184	17	63.7	11
chr1	45040097	45040558	462	219	66	480.04	28.92
chr1	45567790	45568139	350	203	13	57.75	9.43
chr1	45770102	45770884	783	422	121	715.72	35
chr1	45982302	45983098	797	330	72	349.34	22.97
chr1	46871634	46871959	326	153	15	76.82	11
chr1	48131471	48131926	456	302	17	65.85	7.91
chr1	48360062	48360944	883	447	52	259.7	24.01
chr1	48386531	48387155	625	357	40	211.5	18.28
chr1	49146875	49147628	754	382	46	212.06	20.68
chr1	49224345	49224920	576	261	56	332.09	23.17
chr1	50646636	50646975	340	210	13	59.19	9.43
chr1	51772533	51773168	636	255	83	535.16	25.71
chr1	51786881	51787743	863	360	240	1461.01	37.18
chr1	51794858	51795342	485	239	20	88.95	11
chr1	52007177	52008032	856	448	107	627.87	33.45
chr1	52033285	52033924	640	208	31	147.96	13.36
chr1	52998984	52999507	524	378	16	56.4	6.29
chr1	54419813	54420835	1023	197	40	128.55	7.83
chr1	55985592	55986225	634	229	50	287.78	20.44
chr1	56245302	56246542	1241	775	164	727.68	33.44
chr1	56949784	56950204	421	270	14	55.33	8.64
chr1	57021112	57021493	382	196	19	98.93	11
chr1	57153873	57154453	581	431	26	118.96	14.15
chr1	57253754	57254534	781	519	73	426.01	25.79
chr1	57276841	57277311	471	297	41	269.69	25.89
chr1	58028292	58029008	717	461	135	954.69	41.1
chr1	58067936	58068334	399	197	22	120.86	12.57
chr1	59680440	59680846	407	154	16	71.24	10.22
chr1	60593259	60593769	511	235	43	262.93	22.65
chr1	60972303	60972726	424	240	15	61.74	8.64
chr1	61428925	61429361	437	164	17	74.11	11.79
chr1	61681321	61681994	674	210	129	879.81	40.93
chr1	61759566	61759992	427	255	21	99.58	10.07
chr1	62994263	62994722	460	134	14	50.82	7.86
chr1	64653217	64653625	409	248	16	70.94	10.22
chr1	64901700	64902239	540	321	17	60.93	9.43
chr1	66084462	66084900	439	146	15	59.81	10.22
chr1	66731839	66732573	735	336	33	147.04	16.5
chr1	68074728	68075280	553	156	33	180.57	20.07
chr1	68084387	68084672	286	143	18	113.22	14.15
chr1	70223325	70223805	481	132	16	57.53	6.62
chr1	71913940	71914953	1014	516	348	1942.19	30.3
chr1	72468586	72469143	558	355	74	449.61	28.13
chr1	72472070	72472645	576	394	30	89.06	10.11
chr1	72629393	72629756	364	224	14	62.97	10.22
chr1	74120217	74120636	420	234	14	55.46	7.86
chr1	75117987	75118691	705	405	193	1298.03	27.31
chr1	75293087	75293444	358	156	13	56.63	8.64
chr1	76051466	76052020	555	236	33	182.43	19.65
chr1	76525091	76525629	539	323	23	102.94	11
chr1	77103069	77103738	670	309	23	84.62	13.36
chr1	77409614	77410241	628	400	29	110.54	10.1
chr1	77701101	77701472	372	150	14	61.81	8.64
chr1	79266337	79267082	746	339	183	1221.77	38.44
chr1	79393490	79393943	454	280	36	232.4	20.34
chr1	79626542	79627283	742	297	24	71.7	12.38
chr1	80704845	80705369	525	381	16	56.29	8.64
chr1	81856865	81857462	598	266	21	80.23	11
chr1	83629729	83630114	386	147	19	98.16	12.57
chr1	84133141	84133540	400	234	54	465.35	35.37
chr1	84725140	84725663	524	226	19	75.76	13.28
chr1	85225331	85226038	708	224	91	568.12	34.52
chr1	85744397	85744947	551	166	26	124.17	13.36
chr1	85763333	85764195	863	381	88	455.74	23.85
chr1	85969853	85970338	486	330	15	54.27	8.64
chr1	86016553	86017242	690	231	45	219.12	13.16
chr1	86072617	86073312	696	458	48	283.77	18.75
chr1	86288195	86288875	681	370	123	876.95	38.06
chr1	86296184	86296707	524	174	23	105.38	14.15
chr1	86359474	86359934	461	295	25	133.43	11.79
chr1	87939928	87940616	689	414	40	208.96	23.64
chr1	88759394	88759928	535	241	35	205.52	24.36
chr1	88974794	88975569	776	417	28	90.8	13.82
chr1	90071103	90071719	617	354	33	146.96	17.14
chr1	90208893	90209489	597	167	39	203.21	22.22
chr1	90918816	90919413	598	229	22	87.06	10.22
chr1	91565217	91566405	1189	747	444	2283.56	26.75
chr1	92186975	92187326	352	160	13	57.47	7.86
chr1	92215260	92215699	440	248	32	197.59	21.1
chr1	92234319	92234908	590	210	138	916.07	33.87
chr1	92239239	92239909	671	275	33	71.37	9.51
chr1	92241417	92241796	380	149	19	97.98	11.58
chr1	92874928	92875699	772	472	75	425.03	29.75
chr1	93459519	93460029	511	296	58	348.1	23.73
chr1	94074830	94075235	406	196	17	78.84	11
chr1	94245007	94245691	685	492	50	278.22	22.05
chr1	94264648	94265208	561	302	37	217.4	25.93
chr1	94888502	94889128	627	239	63	356.19	25.21
chr1	94891366	94891680	315	157	23	109.08	11.37
chr1	95082921	95083588	668	226	30	135.19	17.29
chr1	96356322	96356775	454	133	14	51.48	6.29
chr1	96721359	96721766	408	255	14	56.96	7.86
chr1	97458736	97459162	427	244	17	75.59	10.22
chr1	97965257	97965824	568	154	34	188.31	22.01
chr1	101931440	101931847	408	141	13	50.29	6.29
chr1	102899806	102900334	529	381	19	75.5	12.57
chr1	107736326	107739118	2793	2083	163	54.3	2.66
chr1	108036117	108036753	637	309	24	57.57	5.27
chr1	108298705	108299559	855	485	152	721.56	26.95
chr1	108396760	108397571	812	562	126	637.1	27.63
chr1	108478978	108479822	845	495	111	484.66	20.11
chr1	108741633	108742473	841	355	128	542.29	23.49
chr1	108899643	108900355	713	351	24	50.19	5.48
chr1	109351195	109351639	445	104	15	51.87	5.5
chr1	109614846	109615243	398	246	15	52.52	7.74
chr1	109638871	109639461	591	286	54	305.92	21.84
chr1	109693638	109694354	717	438	139	809.58	29.75
chr1	109694567	109695156	590	439	39	86.41	9.32
chr1	109723789	109724522	734	376	22	71.1	11
chr1	109741794	109742348	555	187	37	160.12	15.56
chr1	109782466	109783310	845	464	69	270.01	17.22
chr1	109788576	109789515	940	481	139	668.18	29.59
chr1	109817436	109818055	620	223	23	91.05	11
chr1	110048902	110049448	547	204	16	50.97	6.7
chr1	110291621	110292132	512	178	15	51.49	7.07
chr1	110370496	110371374	879	457	42	150.45	13.73
chr1	110548313	110549167	855	432	102	454.88	23.16
chr1	110617516	110618261	746	422	45	225.49	20.39
chr1	110662338	110662897	560	229	19	69.52	7.63
chr1	111154639	111155408	770	584	55	243.74	15.04
chr1	111325319	111325755	437	310	15	59.07	9.26
chr1	111392837	111393399	563	409	18	64.34	7.81
chr1	111641722	111642385	664	325	23	78.17	9.35
chr1	112055927	112056652	726	314	47	191.07	15.82
chr1	112201350	112201857	508	185	15	51.91	8.64
chr1	112366177	112368407	2231	372	97	77.33	5.34
chr1	112428952	112430476	1525	546	170	302.25	14.28
chr1	112521032	112522097	1066	531	257	793.73	19.55
chr1	112533454	112534236	783	383	50	55.59	7.59
chr1	113256114	113256742	629	207	38	190.2	19.95
chr1	114012623	114013078	456	122	15	50.01	5.44
chr1	114518160	114520799	2640	1242	407	596.64	22.25
chr1	114853101	114854695	1595	1035	79	75.46	4.49
chr1	115554388	115555286	899	267	33	69.95	4.83
chr1	115708957	115709839	883	435	68	210.16	15.4
chr1	115721798	115722982	1185	607	109	341.35	16.04
chr1	115866293	115867108	816	387	39	99.82	11.35
chr1	115893482	115894117	636	201	40	109.51	9.85
chr1	115954019	115954760	742	588	31	60.58	5.17
chr1	116255602	116256042	441	203	32	107.67	8.94
chr1	116258667	116259273	607	329	28	51.21	5.44
chr1	116357742	116358934	1193	738	160	579.85	24.61
chr1	116423913	116424449	537	157	22	63.46	9.86
chr1	116495108	116495603	496	231	26	105.92	9.96
chr1	116666291	116666754	464	290	19	65.09	8.87
chr1	116701191	116701671	481	327	20	56.66	5.93
chr1	116854468	116855464	997	623	44	79.31	5.96
chr1	117034554	117035419	866	452	58	150.99	13.12
chr1	117115625	117116149	525	160	21	50.68	7.29
chr1	117161788	117162360	573	156	21	73.46	13.07
chr1	117170911	117171260	350	176	17	88.61	11.79
chr1	117185815	117186402	588	259	18	59.3	6.78
chr1	117195397	117195990	594	222	18	57.2	8.83
chr1	117401375	117401970	596	338	42	161.66	13.97
chr1	117560505	117561305	801	351	103	429.88	19.6
chr1	117841827	117842814	988	303	32	52	5.04
chr1	117894604	117895040	437	288	14	53.42	7.07
chr1	118134712	118135337	626	383	26	62.88	5.92
chr1	118174813	118175500	688	284	58	251.65	14.21
chr1	118213102	118213669	568	144	21	53.57	7.72
chr1	118323151	118323973	823	301	27	52.34	3.96
chr1	118496489	118496963	475	256	15	55.5	7.07
chr1	118640100	118640604	505	149	17	61.72	11.17
chr1	118659465	118660069	605	272	41	153.72	10.63
chr1	119260224	119260627	404	246	13	50.76	6.29
chr1	119709297	119709894	598	302	17	54.85	9.43
chr1	119931120	119931450	331	173	14	68.09	10.22
chr1	120085023	120085636	614	340	18	59.23	7.86
chr1	120105259	120105696	438	153	15	53.29	8.35
chr1	120107657	120108202	546	237	20	74.56	8
chr1	120333254	120333803	550	369	33	117.33	12.38
chr1	120561600	120562167	568	417	44	230.74	23.23
chr1	120574834	120575293	460	138	22	104.14	13.4
chr1	121357605	121358243	639	424	70	202.28	14.43
chr1	121386083	121386701	619	220	39	199.39	23.14
chr1	121478388	121479030	643	275	76	253.39	15.11
chr1	121482882	121485557	2676	1987	1500	3100	9.73
chr1	142535393	142539963	4571	3291	323	230.87	4.29
chr1	143543597	143544399	803	373	30	108.11	8.64
chr1	144018581	144019609	1029	609	50	84.85	4.94
chr1	144527863	144529104	1242	859	58	72.54	4.4
chr1	144529410	144530284	875	470	54	107.83	8.13
chr1	144597431	144598274	844	428	68	349.62	27.12
chr1	144598529	144599155	627	340	21	53.23	9.04
chr1	144826100	144826541	442	287	14	52.84	9.43
chr1	144947619	144949237	1619	1039	74	75.29	4.97
chr1	144985986	144987926	1941	1420	104	68.44	4.26
chr1	145246234	145246601	368	228	49	292.25	19.73
chr1	145290089	145292915	2827	1323	125	111.55	4.13
chr1	145441242	145442322	1081	341	39	55.47	4.3
chr1	145543558	145544064	507	218	21	50.2	5.67
chr1	145566724	145567341	618	478	28	69.47	4.74
chr1	145726210	145727256	1047	503	363	1744.56	29.08
chr1	145830477	145830895	419	221	16	66.26	7.45
chr1	146718641	146719706	1066	303	37	54.35	5.34
chr1	146813418	146814650	1233	619	48	75.18	4.69
chr1	146881213	146881810	598	273	21	50.16	6.17
chr1	146937497	146938728	1232	1075	46	55.86	4.24
chr1	146987057	146987510	454	305	21	52.66	6.9
chr1	147010612	147011442	831	377	58	157.72	13.38
chr1	147191660	147192486	827	405	43	65.13	7.1
chr1	147367048	147367604	557	234	23	56.64	5.46
chr1	147727072	147727718	647	319	19	60.72	8.49
chr1	148009005	148010183	1179	571	45	168.02	9.43
chr1	148559657	148560678	1022	551	119	445.82	21.83
chr1	148560949	148561648	700	255	60	164.48	11.8
chr1	148951767	148952254	488	270	16	57.37	8.19
chr1	149034854	149035533	680	538	31	128.14	11.95
chr1	149205870	149206338	469	247	16	62.79	7.07
chr1	149223304	149223850	547	241	21	71.48	8.95
chr1	149657429	149657886	458	239	15	57.49	8.64
chr1	149989054	149990062	1009	551	254	1148.29	24.18
chr1	150182214	150183045	832	317	35	67.52	4.78
chr1	150518137	150518656	520	289	20	62.83	6.45
chr1	150673444	150674494	1051	271	40	60.27	4.22
chr1	150702745	150703834	1090	201	36	62.78	5.71
chr1	150783742	150784595	854	444	46	101.47	10.2
chr1	150801168	150802062	895	436	35	50.21	4.65
chr1	150907551	150908604	1054	275	38	83.35	7.08
chr1	150943573	150944362	790	375	40	96.89	9.49
chr1	150953816	150954853	1038	594	61	141.12	10.61
chr1	150975396	150976046	651	371	24	52.88	5.67
chr1	150990209	150991156	948	313	33	72.56	4.71
chr1	151283914	151284606	693	301	35	68.53	7.37
chr1	151449310	151449692	383	225	17	53.81	5.44
chr1	151488384	151489406	1023	683	165	635.75	18.53
chr1	151666094	151666617	524	260	25	51.39	4.2
chr1	151738785	151739413	629	324	41	148.85	12.39
chr1	151762282	151763131	850	425	41	80.47	7.87
chr1	151828028	151828569	542	327	60	229.36	12.54
chr1	152135070	152135877	808	416	66	191.12	12.18
chr1	152151486	152152229	744	383	133	583.39	21.82
chr1	152184573	152185220	648	256	25	56.36	6.01
chr1	152272009	152273009	1001	759	37	53.19	3.81
chr1	152376505	152377544	1040	156	36	58.72	4.8
chr1	152652473	152652819	347	131	13	58.18	9.43
chr1	152715309	152716208	900	494	152	712.22	24.92
chr1	152757511	152758231	721	337	24	68.95	7.75
chr1	153002876	153003518	643	252	30	93.04	11.23
chr1	153252166	153252674	509	220	17	51.63	6.96
chr1	153467517	153468088	572	199	37	145.42	13.43
chr1	153483435	153484468	1034	254	72	288.25	17.88
chr1	153581293	153581682	390	129	15	66.44	10.22
chr1	153861000	153861548	549	259	18	56.58	6.73
chr1	154162706	154163464	759	491	167	918.55	31.17
chr1	154278162	154278790	629	308	17	51.91	7.86
chr1	154301620	154302440	821	355	65	274.86	19.75
chr1	154431444	154431978	535	273	17	51.12	5.93
chr1	154602184	154602676	493	359	17	60.39	6.4
chr1	154886928	154887698	771	465	95	485.58	27.71
chr1	154913828	154914247	420	232	17	71.72	10.18
chr1	154955733	154956267	535	218	16	55.22	10.22
chr1	155011157	155011732	576	371	26	102.91	11.87
chr1	155267488	155268069	582	305	17	51.93	8.73
chr1	155488534	155489032	499	221	19	70.36	8.26
chr1	156055869	156056357	489	332	16	57.26	7.45
chr1	156060638	156060952	315	157	14	62.83	9.53
chr1	156086924	156087287	364	169	14	62.97	8.64
chr1	156092338	156092996	659	286	23	76.09	9.04
chr1	156244289	156244873	585	373	20	53.18	6.27
chr1	156291227	156291921	695	354	26	78.55	10.35
chr1	156441275	156441950	676	288	29	102.1	9.33
chr1	156718296	156718772	477	319	20	76.45	11.74
chr1	157172852	157173405	554	305	18	56.02	7.41
chr1	157408136	157408835	700	367	29	70	9.32
chr1	158127556	158128234	679	381	24	54.3	7.03
chr1	158809159	158809566	408	229	18	78.6	9.14
chr1	159940698	159941138	441	200	37	208.38	18
chr1	160208172	160208713	542	200	19	73.82	8.64
chr1	160214020	160214495	476	149	15	55.39	8.64
chr1	160285097	160285746	650	315	24	87.3	13.09
chr1	160404528	160405252	725	298	32	91.76	12.87
chr1	160568779	160569176	398	182	13	51.48	6.29
chr1	160806281	160806597	317	160	14	65.63	9.35
chr1	161088387	161089169	783	407	86	456.26	27.25
chr1	161368394	161368842	449	237	15	58.57	8.64
chr1	161536044	161536396	353	177	13	57.33	8.64
chr1	161558802	161559098	297	148	32	266.35	24.7
chr1	161559153	161559672	520	244	42	273.02	28.21
chr1	161640632	161641579	948	611	43	188.17	18.08
chr1	161646756	161647170	415	231	17	77.42	9.43
chr1	161785991	161786429	439	305	16	66.69	10.22
chr1	162128944	162129762	819	449	100	495.61	26.19
chr1	162351112	162351620	509	223	30	139.19	13.03
chr1	162555709	162556230	522	222	18	66.86	8.29
chr1	162723889	162724405	517	157	17	63.23	7.03
chr1	162816451	162817049	599	442	25	108.47	13.36
chr1	163032899	163033421	523	162	17	50.65	5.75
chr1	163395414	163395866	453	326	18	64.13	6.27
chr1	163955453	163955777	325	154	15	66.23	9.13
chr1	164629759	164630132	374	219	13	54.49	8.64
chr1	164859446	164860010	565	367	25	94.05	11.39
chr1	164920548	164920992	445	310	17	50.33	6.49
chr1	165236806	165237429	624	315	23	80.47	11.13
chr1	165306817	165307243	427	241	16	66.55	9.15
chr1	165756738	165757223	486	185	16	58.97	6.86
chr1	165877647	165878107	461	306	15	50.42	7.03
chr1	166425722	166426232	511	154	17	50.84	6.27
chr1	166572386	166573119	734	379	32	88.56	9.97
chr1	166779053	166779493	441	150	19	53.81	7.08
chr1	166809680	166810570	891	433	69	315.66	27.85
chr1	167012860	167013337	478	153	17	54.13	6.21
chr1	167906677	167907022	346	199	17	89.37	11.79
chr1	168357631	168358149	519	327	21	57.52	5.98
chr1	168562988	168563524	537	307	19	50.53	7.09
chr1	168607789	168608343	555	195	19	59.76	6.52
chr1	169007302	169007901	600	200	20	52.13	6.9
chr1	169077937	169078554	618	308	19	64.93	10.22
chr1	169498418	169499150	733	360	41	129.16	13.02
chr1	169618523	169619277	755	447	25	55.45	5.85
chr1	169749273	169749638	366	150	15	56.25	9.74
chr1	169775933	169776624	692	318	24	60.6	6.57
chr1	169967756	169968329	574	312	18	51.35	5.81
chr1	170941866	170942541	676	308	23	51.56	7.2
chr1	171107511	171108255	745	346	29	62.92	5.92
chr1	171227463	171228225	763	381	31	68.92	8.5
chr1	171730822	171731199	378	143	14	54.59	6.96
chr1	171822691	171823169	479	153	18	53.13	6.11
chr1	172488115	172488662	548	189	18	54.14	7.1
chr1	172520491	172520827	337	181	13	51.03	7.25
chr1	172538411	172538984	574	327	17	50.78	8.44
chr1	172599685	172600483	799	419	118	599.53	26.32
chr1	172715463	172716155	693	266	70	329.83	16.93
chr1	172819856	172820307	452	273	18	60.61	7.69
chr1	172932379	172933033	655	332	21	57.27	6.89
chr1	173298377	173298894	518	194	16	57.05	7.07
chr1	173445775	173446327	553	402	43	190.56	19.08
chr1	173546068	173546488	421	251	14	51.39	6.55
chr1	173651292	173651869	578	269	16	50.91	9.43
chr1	173692318	173692935	618	409	26	91.66	6.89
chr1	173837354	173837872	519	215	30	136.99	16.75
chr1	174241573	174242091	519	185	19	57.76	5.92
chr1	174658683	174659066	384	246	14	52.68	6.12
chr1	174824451	174825006	556	234	17	53.92	6.47
chr1	175155996	175156840	845	475	131	665.79	27.3
chr1	176299860	176300437	578	341	24	79.77	8.28
chr1	176460849	176461502	654	379	23	55.07	6.8
chr1	177186950	177187324	375	211	17	58.38	7.32
chr1	177332004	177332657	654	313	27	66.15	6.52
chr1	177417351	177418441	1091	713	403	2067.71	33.62
chr1	177459558	177460136	579	313	21	60.52	8.13
chr1	177540660	177541242	583	425	27	79.48	9.18
chr1	177740673	177741140	468	317	22	59.44	8.13
chr1	177759684	177760330	647	234	53	236.8	20.03
chr1	178624413	178625238	826	455	56	235.44	20.58
chr1	178917216	178917743	528	147	16	52.93	8.19
chr1	178974515	178975340	826	370	55	206.64	16.17
chr1	179066101	179066533	433	113	16	62.95	8
chr1	179099347	179099756	410	127	15	51.02	7.74
chr1	179175717	179176546	830	329	27	59.55	5.46
chr1	179341207	179341801	595	318	30	122.91	14.41
chr1	179772117	179772587	471	317	15	54.33	7.63
chr1	180009173	180009606	434	291	23	88.23	10.64
chr1	180129197	180129855	659	312	22	55.58	6.84
chr1	180136837	180137446	610	220	95	601.53	17.45
chr1	180197490	180198208	719	343	84	461.6	23.41
chr1	180213812	180214417	606	207	39	144.51	11.38
chr1	180724320	180725152	833	441	32	55.49	4.64
chr1	180834790	180835274	485	324	15	54.38	7.86
chr1	181081547	181082156	610	259	21	56.3	8.63
chr1	181088208	181088915	708	390	32	91.52	10.88
chr1	181095905	181096745	841	365	73	279.96	16.29
chr1	181102700	181103269	570	172	73	318.57	15.39
chr1	181103526	181104430	905	492	50	78.33	8.02
chr1	181482578	181483137	560	268	23	50.84	5.49
chr1	181694701	181695129	429	210	15	59.42	7.63
chr1	181895385	181895879	495	364	16	54.6	7.91
chr1	181932465	181932924	460	233	14	50.82	7.07
chr1	182070514	182070941	428	273	16	61.22	9.43
chr1	182098062	182098571	510	280	43	234	21.28
chr1	182150266	182150917	652	416	19	60.21	6.95
chr1	182187029	182187456	428	222	24	131.91	14.93
chr1	182213560	182214145	586	193	48	265.57	22.09
chr1	182284295	182284854	560	249	26	108.6	11.57
chr1	182366881	182367458	578	268	19	68.2	9.26
chr1	182615369	182615735	367	212	26	111.28	11.01
chr1	182615836	182616341	506	152	21	54.1	7.39
chr1	182629266	182629641	376	156	14	50.58	7.03
chr1	182922390	182922966	577	346	35	154.72	15.1
chr1	182992738	182993526	789	382	137	762.23	33.17
chr1	183071352	183071767	416	213	17	50.41	6.08
chr1	183218237	183219267	1031	518	200	900.16	28.94
chr1	183231930	183232456	527	191	42	221.28	15.82
chr1	183250676	183251342	667	401	41	146.58	14.78
chr1	183538251	183538761	511	226	50	294.66	23.12
chr1	183829528	183830053	526	305	30	94.11	10.55
chr1	184342085	184342740	656	473	27	92.56	8.15
chr1	184377528	184378640	1113	390	44	110.75	10.02
chr1	184595701	184596406	706	244	160	947.76	32.67
chr1	184601807	184602303	497	332	21	63.92	7.32
chr1	184889331	184889884	554	375	18	54.73	5.93
chr1	184935999	184936573	575	319	20	71.69	7.36
chr1	185283291	185283728	438	205	15	58.28	7.63
chr1	185614460	185615087	628	453	77	445.45	25.67
chr1	186098790	186099202	413	238	17	54.16	6.97
chr1	186123767	186124333	567	295	21	78.41	8
chr1	186200869	186201555	687	399	42	127.53	9.95
chr1	186238914	186239516	603	306	20	50.09	6.16
chr1	186631673	186632471	799	384	59	247.07	21.25
chr1	186661182	186661661	480	200	18	51.96	7.09
chr1	186732328	186732810	483	197	17	58.98	8.17
chr1	186762131	186762678	548	152	17	54.11	9.24
chr1	186839998	186840530	533	280	20	53.08	6.74
chr1	187288774	187289169	396	194	14	51.66	6.88
chr1	187461217	187461646	430	177	15	53.12	6.81
chr1	187515283	187515753	471	325	18	76.41	8.64
chr1	187732407	187732875	469	108	15	52.66	6.62
chr1	188484660	188485126	467	274	16	55.38	6.88
chr1	188583999	188584457	459	178	17	57.1	5.64
chr1	188688878	188689206	329	174	16	68.65	9.13
chr1	188920416	188920900	485	150	19	54.77	6.33
chr1	189331272	189331715	444	151	15	54.36	7.91
chr1	189688727	189689453	727	312	90	503.88	29.11
chr1	190112013	190112511	499	239	18	51.74	5.65
chr1	190351244	190351690	447	260	15	57.83	10.03
chr1	190985195	190985848	654	325	20	50.82	7.37
chr1	192510335	192510844	510	270	20	56.51	7.85
chr1	192642010	192642435	426	239	17	67.32	8.94
chr1	192743660	192744325	666	304	24	54	5.89
chr1	192758961	192759317	357	213	14	58.71	8.53
chr1	193334938	193335530	593	199	21	60.8	6.57
chr1	193650061	193650526	466	313	17	51.23	7.48
chr1	193888706	193889402	697	446	85	420.14	23.73
chr1	193991581	193992010	430	156	16	55.33	8.23
chr1	194036662	194037484	823	431	63	237.82	19.6
chr1	194749834	194750546	713	262	31	90.04	8.82
chr1	196403548	196404161	614	344	19	55.98	7.49
chr1	196535300	196535800	501	156	22	67.37	8.68
chr1	196873631	196874037	407	228	17	63.17	8.6
chr1	197001292	197001907	616	293	22	57.22	6
chr1	197142226	197143057	832	472	35	100.88	7.03
chr1	197439607	197440206	600	442	34	131.4	13.3
chr1	197454856	197455485	630	276	39	160.85	16.49
chr1	197936941	197937652	712	414	24	55.64	7.51
chr1	198395225	198395779	555	325	25	56.34	5.54
chr1	198982491	198982848	358	211	19	56.99	6.85
chr1	199354539	199355305	767	349	43	83.6	6.76
chr1	199390453	199391814	1362	600	50	63.99	4.1
chr1	199448353	199449716	1364	773	58	54.8	3.18
chr1	199870282	199871197	916	444	135	634.03	22.52
chr1	199985540	199986664	1125	581	464	2205.09	24.72
chr1	200119634	200120570	937	500	40	88	5.67
chr1	200306100	200307000	901	435	88	341.13	22.22
chr1	200398055	200398983	929	478	125	489.08	24.86
chr1	200446597	200447528	932	469	59	194.19	11.97
chr1	200462251	200463494	1244	431	45	63.99	4.75
chr1	200796062	200796614	553	297	21	51.16	5.8
chr1	200857881	200858753	873	423	49	137.63	14.8
chr1	201028987	201029384	398	156	18	51.07	6.69
chr1	201322371	201323009	639	284	43	159.12	14.5
chr1	201464268	201465072	805	428	134	609.53	24.01
chr1	201573967	201574496	530	238	24	70.34	6.76
chr1	201683597	201684299	703	397	30	67.42	10.4
chr1	201987325	201988418	1094	652	69	218.79	10.06
chr1	201992237	201992587	351	165	24	81.78	7.73
chr1	202004051	202004474	424	212	18	69.04	8.23
chr1	202025847	202026768	922	425	50	142.12	9.47
chr1	202027168	202027763	596	384	35	106.98	9.8
chr1	202075472	202075919	448	173	58	200.42	11.39
chr1	202077054	202078027	974	502	138	418.28	17.45
chr1	202081749	202082459	711	399	53	87.48	9.35
chr1	202101370	202102200	831	439	56	195.81	15.38
chr1	202238491	202239352	862	450	42	86.9	9.57
chr1	202304353	202305171	819	258	100	396.03	17.21
chr1	202349078	202349667	590	147	26	70.84	7.56
chr1	202501265	202501752	488	226	82	500.37	22.15
chr1	203028201	203029118	918	469	72	236.58	16.43
chr1	203057896	203059302	1407	690	640	2617.16	23.23
chr1	203070692	203071531	840	452	38	58.41	7.14
chr1	203100891	203101425	535	190	49	219.56	16.63
chr1	203153949	203154659	711	309	30	74.83	7.5
chr1	203488379	203489159	781	405	35	72.73	8.65
chr1	203574531	203574924	394	214	37	183.7	15.28
chr1	203946501	203946957	457	327	21	57.63	4.83
chr1	203952365	203953079	715	323	31	57.22	5.82
chr1	204099083	204099920	838	391	38	98.12	12.94
chr1	204140804	204141389	586	185	27	63.31	8.06
chr1	204349408	204350203	796	415	44	111.41	12.13
chr1	204382398	204382808	411	254	20	61.67	5.92
chr1	204384936	204385412	477	153	19	53.25	5.57
chr1	204422088	204422525	438	137	21	84.47	9.74
chr1	204542253	204543413	1161	547	44	89.24	4.69
chr1	204677639	204678207	569	247	24	63.56	7.14
chr1	204732605	204733423	819	355	284	1547.14	33.08
chr1	204872387	204873181	795	435	45	99.67	11.05
chr1	205194513	205195373	861	228	29	50.16	4.52
chr1	205288434	205288968	535	181	19	53.5	8.55
chr1	205475026	205475805	780	325	93	474.77	21.61
chr1	206197579	206198306	728	392	36	71.31	9.68
chr1	206571012	206571444	433	242	14	53.89	8.64
chr1	206862184	206862887	704	244	36	98.66	8.55
chr1	206881171	206881925	755	359	66	252.35	16.37
chr1	206970139	206970919	781	351	41	72.61	7.07
chr1	207016737	207017552	816	460	150	706.08	25.09
chr1	207068416	207069295	880	397	49	50.83	4.87
chr1	207071739	207072526	788	398	114	296.62	12.85
chr1	207076207	207077654	1448	923	271	898.69	27.28
chr1	207267007	207267508	502	337	23	54	6.72
chr1	207414614	207415385	772	518	35	54.43	6.14
chr1	207489284	207489852	569	379	24	67.17	8.47
chr1	207494439	207495095	657	384	25	61.16	5.98
chr1	208650070	208650655	586	307	24	103.07	10.22
chr1	208769028	208769545	518	314	16	56.72	9.38
chr1	209295940	209296304	365	143	13	55.68	7.86
chr1	209583023	209583585	563	363	21	84.39	10.94
chr1	209719686	209720328	643	235	92	607.79	35.9
chr1	210540209	210540634	426	155	18	83.22	8.64
chr1	211675786	211676330	545	156	25	117.34	14.93
chr1	211694700	211695324	625	279	188	1345.38	38.56
chr1	211776741	211777357	617	276	26	113.12	14.15
chr1	212640186	212640589	404	263	16	71.68	11
chr1	212731170	212731840	671	333	72	418.16	25.82
chr1	213369740	213370321	582	328	18	62.59	9.43
chr1	214500523	214501349	827	479	77	415.64	29.54
chr1	214873656	214874366	711	252	58	147.87	9.55
chr1	215598196	215599171	976	470	89	248.26	14.71
chr1	215756697	215757169	473	199	35	116.04	8.74
chr1	216202427	216203296	870	156	34	50.55	4
chr1	216650420	216651510	1091	793	42	52.27	3.78
chr1	217530548	217530897	350	199	18	53.14	6.9
chr1	217679433	217680804	1372	1102	53	63.48	4.47
chr1	217922127	217922487	361	163	20	60.93	6.72
chr1	218345686	218346393	708	288	32	51.8	4.26
chr1	218651516	218652270	755	330	35	71.21	7.12
chr1	218789995	218790727	733	291	72	223.66	13.24
chr1	218879259	218879917	659	407	27	65.51	6.05
chr1	218919528	218920527	1000	189	41	68.36	4.17
chr1	219524190	219525123	934	289	41	61.66	3.66
chr1	219715586	219716563	978	265	36	51.11	5.31
chr1	219834480	219834910	431	280	17	68.66	7.11
chr1	220057226	220057929	704	322	22	74.28	11.79
chr1	221842913	221843455	543	216	16	54.38	9.43
chr1	223385928	223386342	415	182	62	522.73	35.77
chr1	223842673	223843349	677	433	37	190.32	22.01
chr1	223870939	223871487	549	369	19	62.53	8.75
chr1	223894895	223895448	554	228	20	79.1	8.64
chr1	223964882	223965281	400	243	13	51.24	8.64
chr1	224727089	224727642	554	253	16	53.26	9.43
chr1	225091644	225092121	478	187	26	138.39	14.93
chr1	225638031	225638602	572	372	75	496.52	33.69
chr1	225961572	225962180	609	362	20	72.28	7.86
chr1	227050131	227050828	698	419	37	176.76	16.93
chr1	228545978	228546623	646	355	17	50.38	9.43
chr1	228619502	228619851	350	204	16	80.51	11.79
chr1	229283833	229284514	682	217	131	850.08	37.56
chr1	229297187	229297942	756	376	31	53.05	8.94
chr1	229297951	229298476	526	224	46	190.89	12.35
chr1	229300795	229301523	729	470	57	213.38	15.33
chr1	229356978	229357627	650	234	39	213.7	18.08
chr1	229364991	229365419	429	141	14	54.37	7.07
chr1	229517681	229518196	516	155	22	99.07	14.15
chr1	229583436	229583960	525	212	25	120.34	17.97
chr1	229640163	229640673	511	357	16	57.83	7.07
chr1	230207078	230207499	422	226	14	55.21	8.64
chr1	230220089	230220821	733	431	26	96.8	14.15
chr1	230487357	230487899	543	148	22	94.87	11.79
chr1	230636045	230636753	709	417	62	339.97	27.69
chr1	231906380	231906954	575	374	54	313.75	23.66
chr1	231961299	231961634	336	181	13	59.78	7.07
chr1	231986647	231987055	409	176	15	56.99	7.65
chr1	232458069	232458421	353	229	13	57.33	7.07
chr1	232576140	232576670	531	148	28	144.36	16.5
chr1	232736062	232736692	631	383	46	246.69	23.01
chr1	233243410	233244028	619	235	31	146.93	17.33
chr1	233678961	233679657	697	321	26	99.81	16.98
chr1	234803865	234804532	668	247	127	863.13	36
chr1	234860527	234861037	511	155	47	269.95	21.84
chr1	235011192	235011806	615	330	20	56.07	8.77
chr1	235012065	235012657	593	282	55	340.89	28.48
chr1	235098665	235099746	1082	448	172	880.91	31.05
chr1	235142334	235142830	497	235	30	169.23	19.65
chr1	236678348	236679036	689	322	20	63.66	10.22
chr1	237043956	237044619	664	368	43	182.73	18.08
chr1	238130719	238131249	531	153	16	55.64	6.29
chr1	238802949	238803334	386	186	14	52.95	7.86
chr1	241428240	241429104	865	420	64	325.13	22.3
chr1	243708801	243709196	396	241	13	50.28	7.63
chr1	244065409	244065919	511	205	25	108.87	13.47
chr1	245118802	245119269	468	165	25	130.21	15.44
chr1	245499583	245500147	565	238	17	58.21	9.43
chr1	246010881	246011460	580	424	25	111.48	14.93
chr1	246772102	246772555	454	137	19	86.31	7.86
chr1	247267605	247268017	413	211	37	262.91	27.51
chr1	247935953	247936703	751	430	23	55.32	7.84
chr10	384740	385336	597	308	34	181.72	22.01
chr10	482015	482628	614	278	106	752.1	36.99
chr10	563111	563651	541	362	32	176.79	15.72
chr10	566381	566733	353	199	13	57.33	9.43
chr10	1310883	1311380	498	347	19	79.73	12.57
chr10	2446198	2446600	403	146	13	50.88	6.29
chr10	3291605	3292116	512	181	26	128.46	14.49
chr10	3734382	3735125	744	409	49	254.22	21.1
chr10	4010926	4011323	398	157	15	58.25	9.43
chr10	4170090	4170630	541	282	32	164.38	17.78
chr10	4321752	4322542	791	331	65	307.07	22.25
chr10	4567270	4567746	477	239	27	136.78	14.93
chr10	5535555	5536097	543	352	23	102.3	11.79
chr10	5538498	5538874	377	196	17	83.68	11.79
chr10	5593430	5594060	631	303	31	149.63	17.29
chr10	5701733	5702859	1127	691	442	2311.28	27.71
chr10	6195194	6195836	643	210	97	432.52	19.81
chr10	6196412	6197163	752	513	107	449.08	17.61
chr10	6338457	6339129	673	364	60	217.57	16.41
chr10	6339445	6340428	984	683	78	250.5	13.27
chr10	7275656	7276059	404	221	13	50.76	8.64
chr10	7742466	7742785	320	153	13	62.23	9.43
chr10	8170148	8170861	714	299	146	977.98	38.04
chr10	8623860	8624338	479	158	16	55.05	7.07
chr10	8630722	8631105	384	189	21	115.45	14.93
chr10	8767791	8768489	699	374	152	985.8	32.42
chr10	8794231	8794780	550	376	31	165.29	21.88
chr10	9230164	9230746	583	156	21	75.47	10.07
chr10	9338041	9338559	519	230	16	56.94	8.64
chr10	11873473	11873984	512	156	16	57.72	7.07
chr10	12192176	12192777	602	206	83	532.9	33.56
chr10	12914594	12915241	648	224	59	325.66	27.83
chr10	13045650	13046056	407	254	14	57.08	7.86
chr10	13082199	13082660	462	238	18	77.71	10.22
chr10	13549283	13549799	517	148	22	98.43	10.16
chr10	15503045	15504030	986	552	88	449.65	26.76
chr10	15669695	15670028	334	169	20	117.96	14.15
chr10	15752610	15753085	476	318	24	121.97	11
chr10	17105001	17105659	659	299	39	211.62	22.79
chr10	17281159	17281603	445	308	14	52.5	10.22
chr10	17487427	17488186	760	486	127	848.77	36.05
chr10	17504785	17505182	398	241	20	93.83	9.63
chr10	17507685	17508168	484	252	31	172.36	18.86
chr10	17696169	17696958	790	348	75	415.85	32.18
chr10	19620183	19620672	490	209	15	53.83	7.07
chr10	19898025	19898483	459	157	19	85.53	11
chr10	20193051	20193653	603	199	31	147.24	19.87
chr10	20924493	20924904	412	157	23	126.71	13.36
chr10	21919099	21919825	727	421	99	624.25	34.65
chr10	22605821	22606203	383	231	18	90.58	10.22
chr10	22921787	22922415	629	283	30	141.97	17.29
chr10	23305546	23306016	471	272	15	55.96	7.86
chr10	23340793	23341239	447	198	34	199.65	17.51
chr10	24156898	24157631	734	397	27	103.46	14.93
chr10	24207229	24207637	409	151	28	173.13	18.08
chr10	24268998	24269558	561	236	19	71.46	10.22
chr10	24315945	24316554	610	224	22	85.48	10.22
chr10	25346346	25347107	762	405	40	171.85	21.1
chr10	25590219	25590580	362	156	15	70.71	11
chr10	28545620	28546271	652	335	54	333.2	24.29
chr10	28944277	28944808	532	151	16	55.21	10.94
chr10	28949151	28949568	418	226	17	76.96	11.79
chr10	29214334	29214942	609	215	46	249.44	21.93
chr10	29228604	29229143	540	328	16	54.7	8.64
chr10	29919089	29919601	513	358	34	201.92	18.86
chr10	30083791	30084362	572	205	17	57.48	9.43
chr10	30097635	30098095	461	259	18	77.85	8.64
chr10	30110000	30110331	332	182	13	60.38	9.43
chr10	30322002	30322485	484	338	15	54.49	8.64
chr10	30783138	30783539	402	199	14	57.73	8.64
chr10	30971104	30971670	567	238	20	77.41	8.64
chr10	32047919	32048282	364	206	27	176.33	18.08
chr10	32632730	32633264	535	219	17	61.5	11
chr10	33553156	33553827	672	251	43	229.7	14.38
chr10	35005961	35006282	322	152	15	77.54	11
chr10	35660324	35660785	462	283	15	50.6	8.64
chr10	36222355	36222799	445	294	20	95.47	14.15
chr10	36293087	36293438	352	195	14	64.76	8.64
chr10	36653208	36653792	585	206	28	133.98	14.93
chr10	37048196	37048811	616	297	30	144.35	14.93
chr10	37156958	37157509	552	347	20	79.36	11.79
chr10	38816139	38818351	2213	1090	99	199.13	6.71
chr10	38871982	38872303	322	168	18	94.96	11.95
chr10	39121085	39121601	517	368	27	117.68	15.34
chr10	39124348	39124679	332	188	13	51.75	7.25
chr10	42354941	42359035	4095	2391	189	104.62	3.88
chr10	42364362	42365510	1149	407	70	108	7.4
chr10	42399169	42400973	1805	302	261	151.94	6.21
chr10	42407924	42408702	779	393	29	54.35	8.18
chr10	42528998	42530787	1790	1231	184	310.56	8.52
chr10	42531504	42533028	1525	436	110	90.37	5.57
chr10	42596615	42598927	2313	1234	205	235.05	6.47
chr10	42598953	42600553	1601	1103	173	282.72	7.31
chr10	42797993	42798485	493	283	16	53.57	7.03
chr10	42814962	42815550	589	316	18	54.26	6.26
chr10	43521616	43522382	767	406	66	339.1	26.9
chr10	43533463	43533878	416	249	19	92.65	10.22
chr10	43606168	43606641	474	228	55	390.29	29.11
chr10	44092060	44092624	565	317	55	324.86	23.52
chr10	44668382	44669581	1200	797	142	672.58	31.29
chr10	44732155	44732866	712	338	28	113.5	18.08
chr10	44754440	44754878	439	248	23	121	14.15
chr10	45137420	45138110	691	266	39	204.47	22.01
chr10	47026899	47027381	483	224	19	54.51	5.75
chr10	47074204	47074864	661	307	23	57.98	7.71
chr10	48331919	48332493	575	304	18	63.36	8.64
chr10	48620838	48621356	519	277	15	50.77	8.64
chr10	48644877	48645544	668	345	29	127.55	16.5
chr10	50021915	50022610	696	306	85	466.05	24.82
chr10	50022893	50023345	453	230	36	146.14	11.29
chr10	50479217	50479699	483	248	22	104.57	11.79
chr10	50496744	50497113	370	152	16	77.06	10.22
chr10	50676146	50676516	371	144	13	54.88	8.64
chr10	50757775	50758384	610	326	18	59.63	11
chr10	51531004	51531546	543	147	20	80.56	9.43
chr10	51547181	51548037	857	364	162	851.04	27.75
chr10	52120747	52121515	769	343	91	525.35	29.57
chr10	52807591	52808064	474	124	16	55.62	10.22
chr10	55653835	55654343	509	163	19	78.19	11
chr10	57333783	57334163	381	230	13	53.59	7.86
chr10	58138005	58138412	408	124	13	50.29	8.64
chr10	60065866	60066274	409	263	13	50.17	7.86
chr10	60082261	60082726	466	149	16	63.17	11
chr10	61082823	61083332	510	235	48	302.81	21.52
chr10	62480465	62480887	423	234	19	91.43	11.79
chr10	62607876	62608939	1064	739	297	1634.92	28.6
chr10	63169347	63170028	682	453	87	531.24	29.32
chr10	64519824	64520470	647	427	19	61.9	10.22
chr10	65237753	65238268	516	230	43	263.07	20.2
chr10	65390381	65391065	685	505	33	135.52	10.66
chr10	65406102	65406875	774	366	28	98.35	14.15
chr10	66825868	66826294	427	257	15	52.45	9.8
chr10	67724325	67724746	422	285	15	62.01	7.86
chr10	67906232	67906748	517	157	17	63.58	10.22
chr10	68385933	68386456	524	209	41	238.11	21.76
chr10	68862386	68863030	645	421	38	205.99	24.36
chr10	69153963	69154652	690	359	22	75.82	9.43
chr10	69579508	69579959	452	277	17	71.96	7.07
chr10	69611691	69612273	583	316	40	239.75	25.93
chr10	69968141	69968859	719	283	65	359.39	29.42
chr10	71075895	71076358	464	188	17	55.3	7.99
chr10	71079090	71079696	607	206	47	243.5	18.99
chr10	71181668	71182111	444	184	19	87.92	12.57
chr10	71199011	71199475	465	265	42	291.97	23.64
chr10	71400994	71401553	560	203	18	65.05	9.43
chr10	71841013	71841693	681	383	102	672.29	34.81
chr10	72626173	72626618	446	261	16	65.75	7.86
chr10	73068718	73069184	467	229	15	56.43	7.86
chr10	73099584	73100192	609	361	30	145.65	14.93
chr10	73628024	73628527	504	147	31	176.57	22.01
chr10	73828581	73829024	444	210	22	111.69	14.15
chr10	74862309	74862922	614	205	26	113.59	14.15
chr10	75894627	75895104	478	309	15	55.16	7.86
chr10	75911327	75911862	536	192	24	111.09	10.22
chr10	76966702	76967143	442	225	34	222.16	23.58
chr10	77874828	77875405	578	421	19	69.42	12.57
chr10	78355433	78355902	470	213	17	69.5	8.64
chr10	78386167	78386798	632	201	90	565.16	29.24
chr10	78401769	78402661	893	267	182	1082.21	34.1
chr10	78650663	78651067	405	275	13	50.64	7.07
chr10	78826405	78827199	795	431	30	98.59	13.32
chr10	79047417	79048036	620	312	31	151.7	19.65
chr10	79106214	79106678	465	262	24	107.12	11.74
chr10	79130369	79131083	715	203	36	156.44	12.38
chr10	79169719	79170364	646	293	21	74.44	11
chr10	79239622	79240297	676	416	35	173.73	15.72
chr10	79342193	79342742	550	332	41	246.2	20.37
chr10	79631972	79632496	525	208	49	307.08	22.15
chr10	79648971	79649615	645	370	26	108.85	11.79
chr10	79731936	79732453	518	190	33	187.45	18.3
chr10	79945251	79945784	534	355	73	520.78	31.65
chr10	80015929	80016507	579	202	27	121.63	14.15
chr10	80274402	80275260	859	426	45	207.3	16.73
chr10	80514033	80514622	590	291	29	141.11	14.15
chr10	80585633	80586675	1043	291	68	262.81	15.33
chr10	80651693	80652526	834	454	85	429.21	25.23
chr10	80671463	80671911	449	276	27	153.67	16.5
chr10	80737506	80738033	528	206	27	136.61	13.36
chr10	80806322	80807070	749	333	30	122.5	20.43
chr10	80888110	80889035	926	410	144	749.95	28.85
chr10	80918169	80918870	702	257	105	596.36	30.57
chr10	81101940	81102729	790	653	29	109.8	11
chr10	81115281	81115750	470	312	28	102.56	12.1
chr10	81118466	81118904	439	245	67	459.82	23.56
chr10	81774335	81774845	511	227	18	71	11
chr10	82050680	82051159	480	263	17	68.18	10.22
chr10	82369536	82369866	331	185	14	68.09	10.22
chr10	82701170	82701564	395	244	14	58.65	7.86
chr10	82726156	82726800	645	420	43	223.82	22.65
chr10	83052390	83052879	490	346	15	53.83	9.43
chr10	84972300	84972702	403	217	15	57.6	8.64
chr10	85891974	85892381	408	137	17	78.52	8.64
chr10	87375741	87376362	622	430	29	135.3	11.79
chr10	88768126	88768488	363	189	26	166.8	18.86
chr10	89336479	89336940	462	226	14	50.6	7.86
chr10	89417050	89417814	765	258	85	520.8	31.11
chr10	89556151	89556625	475	339	15	55.5	8.64
chr10	89970103	89970512	410	143	14	56.7	7.07
chr10	90145242	90145921	680	287	76	414.69	24.96
chr10	90234242	90234783	542	173	19	73.82	10.22
chr10	90438004	90438504	501	227	15	52.64	6.29
chr10	90638526	90638913	388	171	13	52.7	7.86
chr10	91334900	91335679	780	373	40	190.06	19.06
chr10	92079283	92079675	393	211	29	165.18	17.58
chr10	92472752	92473242	491	225	18	73.64	8.64
chr10	92688054	92688609	556	227	26	123.28	14.93
chr10	93882755	93883152	398	153	14	58.25	9.43
chr10	94517765	94518130	366	111	14	62.68	9.43
chr10	94996066	94996475	410	258	13	50.06	7.07
chr10	95163562	95164112	551	393	20	79.49	7.86
chr10	95194748	95195213	466	154	21	99.68	12.57
chr10	95330728	95331227	500	205	79	605.47	33.02
chr10	95773049	95773422	374	157	16	56.19	8.77
chr10	95776690	95777338	649	231	32	121.9	13.73
chr10	96892729	96893227	499	178	15	52.86	7.86
chr10	97259146	97259825	680	330	23	83.41	8.64
chr10	97770868	97771429	562	175	17	58.53	8.64
chr10	97956095	97956653	559	348	25	109.88	12.66
chr10	98215013	98215447	435	191	27	157.05	16.5
chr10	98238654	98239375	722	392	102	634.46	34.92
chr10	98602704	98603172	469	280	34	214.06	18.08
chr10	99168152	99168919	768	362	36	164.69	16.5
chr10	99331277	99331966	690	283	28	105.38	15.07
chr10	99408719	99409193	475	183	20	90.51	12.57
chr10	100073805	100074767	963	492	124	621.37	23.69
chr10	100155708	100156345	638	369	46	255.87	22.46
chr10	101376946	101377469	524	155	29	154.34	18.86
chr10	102138563	102139018	456	244	14	51.26	9.43
chr10	102749181	102749861	681	333	30	133.03	18.08
chr10	102758202	102758800	599	177	25	107.94	14.85
chr10	102851440	102852197	758	404	29	114.11	14.15
chr10	102884152	102884794	643	260	45	234.65	24.29
chr10	103391626	103392152	527	157	17	62.41	9.43
chr10	103591186	103591845	660	417	72	451.42	29.13
chr10	103698065	103698704	640	373	25	102.37	13.36
chr10	104470355	104470924	570	282	106	774.99	36.23
chr10	104513006	104513559	554	275	33	122.55	10.63
chr10	104517009	104517656	648	405	55	286.37	25.75
chr10	104533848	104534536	689	461	73	448.97	31.37
chr10	104559766	104560494	729	398	31	132.87	12.57
chr10	104573759	104574222	464	308	15	56.78	7.86
chr10	104928044	104928719	676	279	63	406.9	31.99
chr10	105593397	105593930	534	269	27	135.44	14.93
chr10	106139570	106139984	415	212	23	124.43	15.44
chr10	106240473	106241162	690	287	35	170.23	19.53
chr10	107699310	107699800	491	154	15	53.72	6.29
chr10	107907708	107908171	464	255	17	67.66	10.55
chr10	108126658	108127160	503	143	15	52.43	7.86
chr10	108540109	108540505	397	239	13	51.32	6.25
chr10	109605102	109605446	345	210	15	73.5	11
chr10	109993625	109994173	549	342	16	53.77	7.07
chr10	110358632	110359023	392	183	13	52.21	7.86
chr10	110481591	110481998	408	138	13	50.29	7.07
chr10	111770214	111770604	391	149	18	89.14	12.57
chr10	112501606	112502211	606	214	25	98.24	15.65
chr10	112541008	112541383	376	174	13	54.23	7.86
chr10	112549546	112550008	463	216	50	340.16	20.05
chr10	112582243	112582990	748	330	67	396.47	29.16
chr10	112867361	112868024	664	403	61	355.13	27.54
chr10	112890883	112891292	410	228	13	50.06	7.86
chr10	113150073	113150747	675	347	80	474.06	28.55
chr10	113813456	113814360	905	501	297	1689.99	35.39
chr10	115390788	115391351	564	235	22	91.78	12.57
chr10	115438118	115439147	1030	526	540	3075.45	25.51
chr10	115510762	115511492	731	438	37	175.27	18.3
chr10	115584224	115584704	481	139	18	73	8.39
chr10	115768144	115768421	278	139	14	78.66	11
chr10	115816748	115817316	569	247	98	674.49	34.6
chr10	115938492	115939014	523	260	24	113.32	13.36
chr10	116138809	116139345	537	337	26	126.72	16.5
chr10	117238954	117239387	434	216	14	53.77	7.86
chr10	117424090	117424943	854	301	333	2095.24	41.36
chr10	117840015	117840503	489	286	28	153.33	15.72
chr10	117902804	117903329	526	271	27	137.01	14.93
chr10	119876156	119876907	752	363	35	159.65	18.08
chr10	119942585	119943087	503	346	24	109.85	10.18
chr10	120141212	120141764	553	187	22	91.91	12.35
chr10	120384841	120385449	609	383	56	363.38	30.96
chr10	120916006	120916699	694	351	24	88.31	10.22
chr10	121076922	121077387	466	315	17	70.03	11
chr10	121285631	121286070	440	214	29	164.98	18.86
chr10	121448610	121449022	413	259	15	56.33	9.43
chr10	122709492	122709999	508	312	18	71.39	10.22
chr10	122756222	122756673	452	131	14	51.71	8.64
chr10	123802173	123802804	632	386	23	89.45	12.57
chr10	123906405	123906957	553	202	23	100.74	15.72
chr10	124987202	124987763	562	318	16	52.46	7.86
chr10	125396295	125396772	478	244	22	105.45	11
chr10	125481221	125481890	670	365	57	291.14	24.06
chr10	125795246	125795747	502	327	15	52.54	6.29
chr10	125816043	125816646	604	397	30	138.52	20.43
chr10	125848218	125848954	737	393	32	116.66	13.76
chr10	125853055	125853470	416	157	17	69.49	9.74
chr10	126028447	126028955	509	316	22	100.2	13.36
chr10	126030341	126030742	402	196	16	71.99	10.22
chr10	126074621	126075218	598	254	75	560.53	37.58
chr10	126598976	126599273	298	149	13	62.87	10.22
chr10	127313104	127313885	782	436	182	1126.56	38.24
chr10	127616796	127617266	471	215	33	203.82	18.08
chr10	127747924	127748420	497	318	15	53.07	6.29
chr10	127864478	127864803	326	171	18	102	12.57
chr10	128121787	128122424	638	313	20	52.89	7.41
chr10	128197228	128198131	904	592	106	567.68	26.58
chr10	128232166	128232937	772	292	142	865.35	34.61
chr10	128353163	128353572	410	152	17	78.21	11.79
chr10	128530101	128530501	401	203	15	64.87	8.64
chr10	128606839	128607538	700	435	71	415.36	15.69
chr10	129127226	129127948	723	280	345	2393.04	41.39
chr10	129573146	129573569	424	133	14	54.97	6.29
chr10	129721316	129721741	426	196	45	319.2	23.82
chr10	129992992	129993636	645	254	74	491.54	35.75
chr10	130339552	130340043	492	157	24	118.92	18.08
chr10	132909626	132910267	642	439	26	109.3	11
chr10	132924987	132925593	607	210	55	344.7	28.35
chr10	134352725	134353204	480	316	19	82.33	12.57
chr10	134362862	134363444	583	386	35	193.72	23.58
chr10	134368895	134369462	568	190	24	105.86	11
chr10	134813447	134813844	398	184	13	51.48	7.86
chr11	249103	249555	453	206	28	161.75	18.08
chr11	395953	396447	495	212	22	102.52	14.15
chr11	469733	470525	793	399	73	446.58	28.77
chr11	1224764	1225491	728	351	42	215.57	20.34
chr11	1243810	1244466	657	376	29	129.35	18.08
chr11	1507129	1507509	381	208	29	191.04	19.65
chr11	1791834	1792313	480	304	30	127.58	14.24
chr11	1793762	1794166	405	235	58	417.05	27.95
chr11	1817553	1818172	620	416	49	281.56	24.08
chr11	1849560	1850391	832	418	47	208.11	25.19
chr11	2190063	2191066	1004	394	86	454.22	25.2
chr11	2634063	2634517	455	227	31	179.7	19.65
chr11	3032045	3032595	551	213	43	278.33	25.93
chr11	3236508	3237067	560	278	36	208.39	19.65
chr11	3435092	3435448	357	200	56	516.92	41.65
chr11	6336802	6337374	573	378	43	258.41	27.64
chr11	6436923	6437532	610	386	35	187.55	20.43
chr11	8251468	8251795	328	181	17	92.96	12.57
chr11	8758783	8759451	669	261	27	112.56	13.36
chr11	9105559	9106097	539	178	22	95.48	11.79
chr11	9918388	9918996	609	247	68	453.68	30.74
chr11	10511843	10512522	680	417	33	147.11	13.82
chr11	11990545	11991130	586	201	38	154.98	17.41
chr11	11993829	11994333	505	155	24	80.78	7.32
chr11	12267039	12267678	640	259	22	55.76	6.66
chr11	12269948	12270556	609	361	33	141.14	13.65
chr11	12577664	12578279	616	209	27	99.48	11.39
chr11	12693508	12693896	389	177	14	59.45	7.07
chr11	12790135	12790722	588	311	38	163.13	15.42
chr11	12850783	12851183	401	157	17	79.65	11.79
chr11	12947236	12947971	736	403	22	70.9	8.64
chr11	12958580	12959160	581	316	23	93.97	14.49
chr11	12966896	12967395	500	140	17	57.56	6.88
chr11	13106210	13106619	410	271	14	56.7	7.07
chr11	13356595	13357420	826	421	66	286.23	20.64
chr11	13384118	13384583	466	138	15	51.78	6.47
chr11	13950872	13951615	744	393	50	207.52	17.22
chr11	14037219	14037830	612	228	24	90.52	9.96
chr11	14366782	14367257	476	295	16	54.3	7.57
chr11	14535939	14536425	487	156	15	54.16	7.86
chr11	15436163	15436597	435	305	15	60.32	7.07
chr11	15515323	15516121	799	417	35	124.44	10.76
chr11	15636862	15637522	661	297	107	635.55	27.38
chr11	15923235	15924002	768	323	77	346.33	22.77
chr11	16804947	16805566	620	267	27	109.1	14.06
chr11	16818161	16818536	376	153	16	76.07	9.43
chr11	16932119	16932463	345	188	13	58.46	9.43
chr11	17260650	17261226	577	314	23	82.85	9.35
chr11	17427287	17427688	402	149	18	87.21	12.57
chr11	17483205	17483703	499	310	27	128.71	15.13
chr11	17791558	17792039	482	235	31	155.99	15.65
chr11	17818405	17818951	547	251	18	65.4	6.95
chr11	18415546	18416141	596	262	22	87.33	12.57
chr11	19049815	19050189	375	176	15	57.13	8.31
chr11	19401793	19402469	677	329	24	76.54	7.99
chr11	19817745	19818470	726	409	100	545.98	27.23
chr11	20016521	20017122	602	330	26	115.5	13.36
chr11	20053045	20054030	986	566	70	81.19	6.03
chr11	20057144	20058547	1404	938	238	876.06	26.12
chr11	20092041	20092432	392	219	16	66.15	9.43
chr11	20135213	20135944	732	353	23	77.46	12.57
chr11	20304993	20305448	456	145	16	50.95	6.83
chr11	21358116	21358696	581	315	20	56.16	7.1
chr11	21706191	21706700	510	213	15	51.7	7.07
chr11	21736810	21737269	460	316	15	50.69	8.35
chr11	21971153	21972024	872	642	79	363.25	25.49
chr11	22110977	22111598	622	188	23	59.32	7.38
chr11	22209304	22209750	447	156	15	58.82	8.64
chr11	22891219	22891763	545	390	17	60.38	8.64
chr11	23107677	23108151	475	261	15	53.88	7.63
chr11	23309503	23310034	532	150	21	85.95	11.3
chr11	23367445	23367919	475	140	15	51.37	8
chr11	23413454	23413995	542	152	17	50.37	6.59
chr11	24843446	24843903	458	154	14	51.04	7.86
chr11	25797154	25797671	518	232	16	55.34	7.63
chr11	25826078	25826552	475	321	19	83.08	9.43
chr11	26039956	26040419	464	157	14	50.39	7.07
chr11	26053567	26054039	473	331	15	51.6	7.27
chr11	27582562	27583035	474	148	15	53.35	6.78
chr11	27711820	27712281	462	133	14	50.6	7.07
chr11	27882592	27883230	639	187	29	86.15	10.05
chr11	27923942	27924316	375	165	13	52.32	8.29
chr11	28169191	28169710	520	294	17	57.2	8.53
chr11	28364492	28365341	850	415	66	305.36	21.44
chr11	28633323	28633753	431	197	15	60.83	8.64
chr11	28815817	28816598	782	362	54	210.12	16.78
chr11	29283033	29283412	380	197	45	280.65	17.66
chr11	29797152	29797687	536	266	18	56.76	5.27
chr11	30542783	30543876	1094	632	352	1880.52	37.05
chr11	30549073	30549503	431	246	34	203.13	17.32
chr11	30582249	30582715	467	326	23	100.17	10.55
chr11	30890039	30890585	547	254	17	59.07	10.81
chr11	31256355	31256764	410	294	14	52.15	7.19
chr11	31283396	31283791	396	154	15	54.18	8.31
chr11	31473934	31474339	406	207	14	53.23	7.27
chr11	32124690	32125525	836	445	61	234.88	17.02
chr11	32655223	32655739	517	141	16	56.83	7.03
chr11	34146533	34147198	666	330	22	78.11	9.38
chr11	34317924	34318352	429	252	14	54.37	9.43
chr11	34353965	34354610	646	200	46	227.23	17.58
chr11	34670511	34670962	452	151	14	51.71	6.29
chr11	34686567	34687087	521	260	27	116.91	13.43
chr11	34689525	34690285	761	395	30	106.49	13.76
chr11	34778658	34779223	566	203	17	55.61	6.03
chr11	34795918	34796415	498	341	15	52	6.17
chr11	34804785	34805308	524	213	17	62.76	9.43
chr11	34844583	34845235	653	355	43	172.71	14.23
chr11	34847973	34848437	465	197	19	57.45	7.38
chr11	34994731	34995253	523	337	19	66.46	7.49
chr11	35031176	35031937	762	502	43	174.91	13.36
chr11	35119362	35119773	412	268	18	85.52	10.22
chr11	35252252	35252726	475	149	17	58.08	5.93
chr11	35285618	35286485	868	447	124	637.23	26.37
chr11	35313798	35314671	874	505	30	93.29	6.26
chr11	35317241	35317863	623	308	22	64.27	10.35
chr11	35387295	35388075	781	292	75	378.34	23.73
chr11	35411187	35412091	905	441	85	361.9	24.46
chr11	35516597	35517130	534	213	17	61.61	9.43
chr11	35575265	35575875	611	274	34	142.27	13.6
chr11	35819230	35819713	484	330	20	82.5	11.51
chr11	35971372	35972057	686	438	35	122.84	10.19
chr11	35973002	35973613	612	293	23	62.4	8.11
chr11	36041963	36042451	489	187	15	53.63	8.6
chr11	36333893	36334865	973	547	153	717.95	29.77
chr11	36501287	36501798	512	364	16	57.72	8.64
chr11	36606755	36607216	462	245	14	50.6	8.64
chr11	36776142	36776629	488	149	17	52.92	5.58
chr11	37441287	37441854	568	296	23	86.37	9.53
chr11	37703996	37704491	496	231	16	55.13	8
chr11	37867739	37868161	423	274	14	51.74	8.1
chr11	38295642	38296092	451	151	18	79.34	7.86
chr11	38404166	38404756	591	281	60	315.87	17.89
chr11	38467890	38468328	439	187	17	73.82	10.22
chr11	38838635	38839055	421	266	14	54.41	6.17
chr11	38852208	38852708	501	258	18	59.03	6.39
chr11	39234463	39234866	404	156	13	50.76	8.64
chr11	39388420	39388861	442	290	14	52.84	7.86
chr11	39401815	39402263	449	291	16	60.17	5.75
chr11	39990886	39991364	479	286	15	55.05	8.64
chr11	40070721	40071268	548	343	24	109.08	16.5
chr11	40258285	40258722	438	162	18	72.39	10.32
chr11	41496206	41496571	366	155	13	55.55	7.86
chr11	41606469	41607006	538	207	17	59.34	9.15
chr11	41944342	41944721	380	232	13	51.11	8.19
chr11	42851057	42851610	554	246	18	64.59	6.95
chr11	43072684	43073172	489	344	19	63.49	6.09
chr11	43593125	43593653	529	176	18	68.36	10.16
chr11	44227544	44228158	615	422	108	705.72	33.55
chr11	44322023	44323131	1109	512	291	1513.66	26.03
chr11	44340471	44341001	531	207	21	89.36	12.57
chr11	45007261	45007749	489	290	40	257.29	21.34
chr11	45182743	45183274	532	275	52	340.56	26.75
chr11	45430471	45431017	547	209	39	212.3	21.56
chr11	45431166	45431462	297	148	14	65.8	10.07
chr11	45703355	45703760	406	152	13	50.53	7.86
chr11	45969311	45969801	491	247	30	121.49	12.76
chr11	46255511	46256103	593	318	56	348.51	25.69
chr11	46295457	46295944	488	136	15	54.05	7.86
chr11	46359944	46360501	558	359	24	100.56	15.28
chr11	46384901	46385747	847	403	57	275.29	25.19
chr11	46924176	46924915	740	390	29	116.64	13.36
chr11	46963691	46964211	521	211	42	248.39	20.44
chr11	47006327	47007171	845	456	38	144.21	13.32
chr11	47264901	47265481	581	240	29	133.07	12.95
chr11	47592714	47593392	679	270	32	118.91	12.78
chr11	47627110	47627773	664	330	21	72.41	10.22
chr11	48622392	48622875	484	355	15	54.49	8.64
chr11	48854703	48854980	278	139	15	70.44	8.05
chr11	51571753	51573608	1856	1409	92	98.85	6.89
chr11	51579391	51579802	412	240	38	152.02	11.01
chr11	51583317	51583630	314	157	15	57.36	8.11
chr11	51590926	51592179	1254	404	54	198.07	16.69
chr11	57070941	57071325	385	227	21	115.23	14.15
chr11	59161838	59162195	358	189	14	60.98	8.19
chr11	59537798	59538450	653	223	27	114.39	12.5
chr11	59822515	59823124	610	227	21	78.72	8.64
chr11	59880045	59880539	495	342	18	64.43	7.57
chr11	60099915	60100409	495	173	36	211.71	21.33
chr11	60113457	60113825	369	186	30	173.07	15.67
chr11	60138415	60138869	455	301	14	51.37	9.43
chr11	60459511	60460117	607	290	27	98.06	14.75
chr11	60520969	60521347	379	221	15	64.35	8.83
chr11	60648242	60648856	615	416	40	230.41	23.44
chr11	61278372	61278802	431	276	18	82.42	11.79
chr11	61300904	61301329	426	263	17	75.74	10.22
chr11	61407362	61407822	461	166	14	50.71	7.86
chr11	61814230	61814739	510	213	22	100.04	14.15
chr11	62009451	62010079	629	297	23	81.62	9.96
chr11	62355244	62355614	371	149	14	61.95	7.86
chr11	62420720	62421142	423	156	20	99.37	12.57
chr11	62608810	62609355	546	278	21	87.2	7.86
chr11	62993866	62994278	413	247	14	56.33	9.43
chr11	63358718	63359253	536	257	21	88.63	14.15
chr11	63389861	63390359	499	343	19	72.63	8.53
chr11	63639608	63640090	483	234	16	53.49	7.57
chr11	63888552	63888961	410	147	14	56.7	7.86
chr11	64035664	64036314	651	362	57	387.41	33.6
chr11	64206485	64207168	684	203	45	217.27	17.21
chr11	64274229	64274613	385	197	29	167.06	14.85
chr11	64450037	64450525	489	341	16	55.29	7.91
chr11	64610884	64611389	506	241	30	166.44	17.19
chr11	64644161	64644823	663	266	99	617.09	30.2
chr11	64736671	64737236	566	320	18	64.37	7.86
chr11	64769503	64770022	520	268	15	50.67	10.22
chr11	64876281	64876682	402	144	17	56.75	7.64
chr11	64878139	64878864	726	211	54	282.32	19.05
chr11	64942191	64942709	519	201	18	63.35	11.79
chr11	65026985	65027368	384	231	13	53.21	7.86
chr11	65147310	65147924	615	228	112	728.85	26.34
chr11	65159886	65160494	609	276	25	106.94	15.72
chr11	65185854	65186755	902	401	83	340.32	21.6
chr11	65225866	65226534	669	324	211	1431.11	37.09
chr11	65323284	65323738	455	262	16	64.57	10.22
chr11	65505046	65505532	487	144	15	54.16	8.64
chr11	65519691	65520370	680	351	21	51.49	7.76
chr11	65780166	65780918	753	217	90	520.75	24.77
chr11	65891214	65891792	579	200	22	81.69	9.96
chr11	65904926	65905287	362	155	33	218.21	18.18
chr11	66516512	66516868	357	213	15	71.51	10.22
chr11	66764290	66765137	848	337	39	134.33	12.42
chr11	66829396	66830379	984	451	176	880.38	31.9
chr11	67016013	67016491	479	213	18	75.29	11
chr11	67461043	67461838	796	403	31	91.25	12.89
chr11	67564140	67564448	309	154	24	161.1	18.86
chr11	67785752	67786439	688	282	222	1502.26	39.33
chr11	67805636	67806263	628	197	47	239.03	20.32
chr11	67983779	67984636	858	402	222	1302.83	39.5
chr11	68065218	68065650	433	227	18	82.1	11
chr11	68147766	68148472	707	252	65	348.66	24.06
chr11	68713944	68714667	724	338	30	81.25	10.72
chr11	68890173	68890742	570	183	40	189.5	13.88
chr11	69065998	69066615	618	174	73	305.7	18
chr11	69069086	69069708	623	289	63	243.1	13.92
chr11	69294511	69295094	584	426	26	112.08	13.25
chr11	69329779	69330597	819	456	194	992.96	29.94
chr11	69356216	69357102	887	424	116	545.39	31.01
chr11	69468496	69470157	1662	1284	85	200.78	7.76
chr11	69511702	69512362	661	435	98	537.79	27.17
chr11	69696812	69697308	497	344	15	53.07	7.86
chr11	69706059	69707103	1045	471	290	1312.83	26.17
chr11	69709025	69709578	554	372	49	54.45	4.89
chr11	69950574	69951006	433	209	48	138.88	8.1
chr11	69952056	69952962	907	518	213	1131.51	23.31
chr11	70015623	70016146	524	296	20	75.88	12.09
chr11	70049570	70049811	242	121	17	125.87	11.21
chr11	70105169	70105716	548	184	54	268.39	19.51
chr11	70159017	70159499	483	297	17	54.68	7.59
chr11	70334895	70335355	461	313	16	63.8	6.29
chr11	70449704	70450255	552	316	101	677.93	31.65
chr11	70521989	70522547	559	252	19	64.21	10.55
chr11	70552137	70552666	530	317	20	66.13	6.27
chr11	70651680	70652553	874	445	100	469.07	29.29
chr11	70913562	70914218	657	402	74	389.02	20.54
chr11	70964500	70964864	365	175	23	120.87	13.7
chr11	71192193	71192992	800	471	39	153.1	10.87
chr11	71506746	71507341	596	184	41	245.7	21.22
chr11	71659197	71659849	653	301	34	143.67	15.98
chr11	71776085	71776378	294	147	13	50.74	7.99
chr11	71910370	71910707	338	139	21	125.62	13.28
chr11	72109007	72109509	503	209	26	100.32	10.64
chr11	72483928	72484474	547	230	19	73.19	11
chr11	72497321	72497941	621	331	327	2299.04	33.29
chr11	72905486	72906158	673	237	23	74.5	8.29
chr11	72938804	72939236	433	148	15	53.89	7.86
chr11	74480287	74480865	579	271	16	50.5	8.6
chr11	74747039	74747493	455	214	16	64.57	9.43
chr11	74893139	74893404	266	133	13	78.66	10.22
chr11	75044587	75045328	742	379	87	465.1	26.23
chr11	75062121	75062504	384	182	40	275.2	23.9
chr11	75083212	75083697	486	152	15	54.27	9.43
chr11	75287335	75287994	660	366	35	129.71	15.28
chr11	75490696	75491203	508	343	15	51.91	5.5
chr11	75663610	75664033	424	217	17	72.59	9.68
chr11	76477079	76477898	820	431	111	512.67	25.02
chr11	76483274	76484348	1075	532	380	1790.92	31.15
chr11	76499335	76500274	940	515	46	164.11	14.06
chr11	76674211	76674905	695	315	23	81.64	9.43
chr11	76731155	76731708	554	320	22	81.71	8.85
chr11	76746154	76747022	869	437	91	412.43	21.85
chr11	76749379	76749954	576	391	25	50.35	7.2
chr11	76941742	76942280	539	265	20	73.86	8.53
chr11	77118538	77119270	733	403	39	145.62	15.55
chr11	77226593	77227106	514	309	15	51.28	7.07
chr11	77538653	77539044	392	113	13	52.21	7.07
chr11	77867370	77867877	508	251	24	99.24	11.09
chr11	77970718	77971747	1030	587	338	1800.04	34.75
chr11	78131594	78132543	950	534	41	127.63	10.36
chr11	78770722	78771546	825	430	145	857.36	33.29
chr11	79064701	79065172	472	229	35	181.31	16.84
chr11	79508616	79509200	585	314	18	62.27	7.86
chr11	79517665	79518320	656	314	53	288.45	26.27
chr11	80611535	80611929	395	152	14	54.64	7.27
chr11	82318468	82319027	560	403	25	99.48	9.99
chr11	82340009	82340477	469	313	16	57.02	6.4
chr11	82350848	82351512	665	438	55	223.77	17.04
chr11	82502376	82502805	430	275	14	54.25	7.86
chr11	82611425	82611929	505	365	18	63.85	9.04
chr11	82715054	82715845	792	278	230	1394.05	31.54
chr11	82864468	82865063	596	275	24	101.57	12.57
chr11	83121617	83122082	466	154	26	117.42	12.41
chr11	83231840	83232429	590	317	28	131.16	13.12
chr11	83306480	83307048	569	242	18	64.03	8.64
chr11	84398440	84399097	658	258	111	662.03	29.24
chr11	84657970	84658361	392	150	13	52.21	9.43
chr11	84797496	84797949	454	160	14	50.57	5.4
chr11	85220215	85220673	459	193	14	50.93	5.5
chr11	85342002	85342535	534	156	18	68.12	7.07
chr11	85448600	85449139	540	372	25	103.77	15.49
chr11	85498793	85499397	605	299	19	66.35	8.64
chr11	85539055	85539560	506	300	21	93.14	12.57
chr11	85735095	85735556	462	257	15	50.6	9.43
chr11	86390957	86391701	745	429	29	68.87	6.82
chr11	86452953	86453458	506	144	19	78.61	8.64
chr11	86486879	86487788	910	556	254	1407.36	33.37
chr11	86650878	86651473	596	339	31	156.38	16.5
chr11	87634698	87635620	923	502	186	1097.3	41.04
chr11	87829186	87829740	555	249	31	164.9	19.65
chr11	88434854	88435227	374	153	19	100.51	11.79
chr11	91129447	91130004	558	408	20	78.57	7.86
chr11	93383643	93384091	449	216	52	399.31	32.74
chr11	94135306	94135852	547	389	36	211.72	23.58
chr11	94480162	94480608	447	303	15	58.82	10.22
chr11	94578755	94579247	493	162	33	197.82	22.79
chr11	94744990	94745537	548	393	18	66.45	12.57
chr11	95118581	95119341	761	365	52	93.21	8.76
chr11	95120241	95120967	727	432	153	837.43	28.57
chr11	95726423	95726878	456	271	16	64.44	8.64
chr11	99788544	99788923	380	230	13	50.55	6.62
chr11	100870228	100871105	878	446	168	941.87	33.47
chr11	100904747	100905479	733	222	135	847.06	34.74
chr11	101169618	101170795	1178	467	198	814.39	20.52
chr11	101171117	101171803	687	245	63	142.41	10.37
chr11	101207476	101207935	460	324	15	57.25	7.86
chr11	101213035	101213453	419	266	15	62.4	7.86
chr11	101277998	101278624	627	380	66	382.1	27.05
chr11	101312184	101312896	713	406	94	558.28	30.78
chr11	101804960	101805500	541	263	16	54.59	7.07
chr11	102118492	102118679	188	94	15	171.21	11.79
chr11	102178169	102178814	646	415	24	94.49	14.15
chr11	102269841	102270263	423	266	18	83.7	11.79
chr11	102339279	102339684	406	209	25	145.93	15.72
chr11	103422991	103423773	783	455	100	552.02	33.06
chr11	103951244	103951643	400	252	14	57.99	9.43
chr11	104100494	104100900	407	220	14	57.08	7.86
chr11	105241812	105242415	604	382	32	163.13	18.86
chr11	106331681	106332537	857	334	231	1362.85	37.14
chr11	107487076	107487906	831	498	30	105.56	9.68
chr11	107563236	107563691	456	126	15	57.72	8.64
chr11	108537757	108538414	658	437	51	249.25	17.16
chr11	109547225	109547723	499	347	15	52.86	7.07
chr11	109870596	109871029	434	218	14	53.77	8.64
chr11	110166341	110166883	543	340	53	255.1	16.35
chr11	110169838	110170293	456	177	46	221.63	14.02
chr11	110208464	110208893	430	188	32	205.2	22.66
chr11	110569542	110569931	390	151	16	73.83	10.22
chr11	110681198	110681597	400	252	13	51.24	9.43
chr11	110929133	110929503	371	242	15	61.95	7.86
chr11	111205114	111205821	708	380	75	442.94	26.37
chr11	111298154	111298538	385	203	16	74.62	11
chr11	112163807	112164163	357	200	15	71.51	10.22
chr11	112425120	112425870	751	374	22	69.38	12.57
chr11	112435131	112435615	485	359	15	54.38	6.29
chr11	112578182	112578756	575	337	33	169.5	15.45
chr11	112873405	112874038	634	386	23	89.18	7.86
chr11	113055249	113055699	451	183	38	251.71	23.08
chr11	114186552	114187267	716	313	87	560.45	33.51
chr11	114431934	114432550	617	205	21	71.35	7.86
chr11	114575991	114576556	566	171	24	106.17	13.36
chr11	114914990	114915608	619	400	41	196.12	17.91
chr11	115323031	115323458	428	229	37	257.53	22.01
chr11	115341850	115342633	784	463	50	250.85	22.89
chr11	115420803	115421660	858	440	56	283.69	27.61
chr11	115708251	115708587	337	155	16	82.88	11.79
chr11	115812403	115812983	581	156	80	551.8	38.95
chr11	116268424	116268856	433	281	14	53.89	6.29
chr11	116413680	116414106	427	205	22	115.02	14.15
chr11	116611573	116612062	490	192	102	811.04	39.16
chr11	116706654	116707487	834	436	38	168.89	23.58
chr11	116941799	116942535	737	430	42	186.02	14.56
chr11	117055973	117056312	340	149	15	74.35	10.22
chr11	117173802	117174233	432	156	24	131.03	17.29
chr11	117381679	117382186	508	366	17	64.66	8.64
chr11	117640611	117641081	471	279	15	55.96	6.29
chr11	117928409	117929136	728	315	42	197.64	22.89
chr11	118782621	118783139	519	238	15	50.77	7.86
chr11	119536462	119536812	351	131	17	88.42	11.79
chr11	119551886	119552400	515	301	18	70.49	9.43
chr11	119780467	119781202	736	430	54	296.29	29.31
chr11	119995671	119996108	438	217	16	66.83	10.22
chr11	120172376	120173002	627	315	21	76.66	10.22
chr11	120269834	120270370	537	178	26	126.72	15.72
chr11	120507631	120508397	767	419	47	257.61	26.72
chr11	120683503	120683925	423	266	33	218.07	21.22
chr11	120801820	120802388	569	193	19	70.49	12.57
chr11	121196812	121197456	645	215	47	239.25	21.5
chr11	121928161	121928593	433	223	14	53.89	7.07
chr11	122433765	122434465	701	302	36	177.08	23.58
chr11	123041456	123041921	466	303	14	50.17	7.86
chr11	124700760	124701210	451	155	14	51.82	9.43
chr11	125185414	125185866	453	127	14	51.59	9.43
chr11	125219459	125219829	371	239	13	54.88	9.43
chr11	127692731	127693126	396	148	15	65.58	9.43
chr11	128311152	128311553	402	251	13	51	8.64
chr11	128738723	128739164	442	206	33	212.22	20.43
chr11	129408102	129408643	542	194	21	87.77	10.22
chr11	129564254	129564749	496	323	19	80.01	12.57
chr11	129565815	129566243	429	221	17	75.29	11
chr11	130351620	130352050	431	230	21	105.98	12.57
chr11	130902992	130903633	642	206	31	147.6	14.15
chr11	131566644	131567171	528	148	19	75.64	11.79
chr11	131579546	131580319	774	412	75	473.45	37.72
chr11	134412332	134412796	465	151	27	149.95	17.29
chr12	589422	590035	614	210	91	598.31	34.81
chr12	834157	834816	660	314	240	1670.57	39.45
chr12	1003547	1004042	496	191	16	55.79	8.1
chr12	2041239	2041924	686	341	27	100.34	12.8
chr12	2318919	2319387	469	141	15	56.19	8.64
chr12	2364722	2365401	680	379	43	197.36	19.11
chr12	2395086	2395769	684	290	23	82.93	9.43
chr12	2904968	2905648	681	263	272	1888.47	42.77
chr12	3594841	3595470	630	345	87	527.14	29.31
chr12	3623226	3623994	769	454	310	2066.54	41.78
chr12	3651706	3652330	625	419	24	79.46	11.01
chr12	3659320	3659998	679	184	59	309.23	21.81
chr12	3668537	3669057	521	315	17	63.11	8.64
chr12	3842192	3842627	436	156	26	147.77	18.08
chr12	3855749	3856337	589	372	44	247.99	17.99
chr12	3918934	3919383	450	306	15	51.86	6.96
chr12	4120771	4121255	485	242	84	589.99	26.69
chr12	4394100	4394540	441	302	15	51.21	6.06
chr12	4401145	4401616	472	115	15	52.94	5.96
chr12	4550569	4550851	283	141	13	70.62	10.22
chr12	5197899	5198462	564	291	19	58.72	7.83
chr12	5367298	5367724	427	278	19	88.56	12.2
chr12	5475931	5476494	564	404	26	113.23	15.1
chr12	5488848	5489433	586	153	34	140.68	12.88
chr12	6028028	6028946	919	519	188	1050.04	25.47
chr12	6174453	6174849	397	143	18	88.08	12.57
chr12	6363965	6364280	316	138	15	78.66	11
chr12	6384540	6385323	784	533	26	90.61	7.86
chr12	6389148	6389531	384	165	13	53.21	7.07
chr12	6472703	6473629	927	532	133	784.02	35.65
chr12	6480240	6480727	488	301	19	80.75	8.6
chr12	6481961	6482489	529	365	17	53.6	9.53
chr12	6642691	6643243	553	250	22	93.38	11.79
chr12	6801508	6801968	461	282	15	50.71	7.07
chr12	7012976	7013471	496	157	21	82.69	8.75
chr12	7470979	7471499	521	208	16	56.72	8.64
chr12	7857818	7858275	458	154	14	51.04	7.07
chr12	8038371	8038987	617	436	41	212.09	20.44
chr12	8810680	8811099	420	252	15	62.27	9.43
chr12	8903228	8903759	532	388	18	68.37	7.86
chr12	9284773	9285233	461	217	22	89.77	8.77
chr12	9359671	9360388	718	359	20	57.24	10.42
chr12	9853799	9854257	459	155	17	70.99	8.64
chr12	9868574	9868981	408	206	16	71.09	9.43
chr12	10034463	10035003	541	368	20	76.9	10.42
chr12	12419881	12420318	438	231	31	181.51	15.65
chr12	12670444	12671107	664	374	61	364.16	30.43
chr12	12739968	12740298	331	145	15	75.92	10.22
chr12	12826213	12826646	434	135	25	120.32	13.56
chr12	12956940	12957342	403	215	18	80.19	10.67
chr12	12972643	12973094	452	143	18	79.19	7.86
chr12	13025156	13025790	635	300	18	50.41	8.44
chr12	13036238	13036725	488	337	15	54.05	7.07
chr12	13375980	13376734	755	426	39	149.02	14.65
chr12	13594513	13594911	399	244	14	51.83	6.96
chr12	14063077	14063500	424	192	14	52.21	7.45
chr12	14146907	14147186	280	140	13	70.62	10.22
chr12	14416677	14417238	562	173	26	114.44	17.29
chr12	14566578	14567027	450	122	14	51.93	8.64
chr12	14972907	14973480	574	218	29	109.65	13.11
chr12	15007523	15008032	510	149	17	64.42	9.43
chr12	15021696	15022577	882	413	34	132.04	10.22
chr12	15039106	15039919	814	382	44	166.1	16.8
chr12	15088229	15089016	788	512	52	224.24	15.69
chr12	15369398	15369966	569	208	26	121.01	13.36
chr12	15395797	15397048	1252	482	85	265.66	19.9
chr12	15426896	15427276	381	187	28	144.59	13.56
chr12	16155718	16156201	484	239	15	54.18	7.81
chr12	16161329	16161809	481	345	18	59.11	7.37
chr12	16470070	16470903	834	425	55	230.95	19.51
chr12	16476383	16476922	540	154	19	62.92	9.99
chr12	17376355	17376738	384	265	14	60.13	7.86
chr12	17577604	17578143	540	362	17	59.84	7.72
chr12	18092485	18092985	501	377	17	60.1	7.91
chr12	18496475	18497104	630	390	28	98.24	11.94
chr12	18721375	18721964	590	312	23	71.31	8.79
chr12	19174506	19175138	633	225	31	116.78	10.06
chr12	20010528	20010886	359	156	15	66.76	9.46
chr12	21090900	21091285	386	219	14	52.95	9.43
chr12	22289052	22289514	463	280	21	100.2	11.79
chr12	22414746	22415104	359	213	13	56.5	8.64
chr12	22612376	22612816	441	293	14	52.96	7.07
chr12	22701343	22702000	658	226	58	284.57	22.06
chr12	22720567	22721437	871	494	89	399.65	19.83
chr12	22746698	22747166	469	356	16	55.75	6.26
chr12	22852461	22852927	467	244	16	54.17	6.73
chr12	23056924	23057394	471	325	15	54.33	6.86
chr12	23099011	23099533	523	156	17	58.21	10.91
chr12	23142520	23143046	527	229	18	63.27	8.63
chr12	23378408	23379284	877	478	150	804.76	33.56
chr12	23387490	23387988	499	225	30	51.79	5.59
chr12	23388025	23388965	941	536	134	548.3	22.26
chr12	25725536	25726304	769	357	29	103.44	12.23
chr12	25857753	25858191	439	143	16	64.9	9.15
chr12	26035024	26035301	278	139	13	70.62	10.22
chr12	26254133	26255070	938	460	111	511.73	23.73
chr12	26306131	26306566	436	295	15	60.19	11
chr12	26428275	26428889	615	344	17	52.88	9.38
chr12	27248049	27248489	441	239	15	59.56	10.22
chr12	27304228	27304636	409	155	13	50.17	7.86
chr12	27612631	27612997	367	217	13	55.41	8.64
chr12	28164776	28165497	722	333	21	66.32	13.36
chr12	28328988	28329408	421	173	15	50.92	7.67
chr12	28331903	28332488	586	434	21	56.6	6.11
chr12	29873020	29873421	402	156	13	51	8.64
chr12	31463883	31464636	754	400	53	262.12	21.1
chr12	31612894	31613375	482	213	18	74.87	10.22
chr12	31631220	31631792	573	321	16	51.39	6.29
chr12	31811841	31812142	302	151	20	108.41	13.19
chr12	31902015	31902586	572	303	43	251.09	22.26
chr12	31926110	31926775	666	447	48	216.54	17.64
chr12	32496805	32497478	674	369	29	104.88	13.43
chr12	32874577	32875000	424	276	14	51.04	6.55
chr12	32922767	32923374	608	211	24	87.31	6.81
chr12	32985901	32986438	538	234	18	66.47	10.03
chr12	33165156	33165671	516	296	20	75.39	8.35
chr12	33490812	33491307	496	156	16	53.85	6.4
chr12	33740504	33741310	807	589	45	135.6	8.29
chr12	33762352	33763043	692	336	185	1105.41	31.98
chr12	33996464	33997179	716	570	26	55.11	4.72
chr12	34089592	34090302	711	354	22	62.78	6.81
chr12	34323841	34324383	543	253	23	78.62	7.69
chr12	34841327	34841864	538	218	29	61.35	6.46
chr12	34842503	34843221	719	327	35	53.75	8.36
chr12	34846026	34847377	1352	321	61	68.58	8.09
chr12	34854829	34855368	540	321	18	55.04	8.4
chr12	38225216	38227236	2021	955	87	72.25	3.75
chr12	38749646	38750192	547	264	18	50.68	7.3
chr12	39363758	39364213	456	304	17	71.4	11
chr12	39909278	39909605	328	163	14	53.56	7.1
chr12	39968623	39969236	614	285	20	60.98	7.41
chr12	40135300	40136054	755	365	34	85.36	9.43
chr12	41221310	41221881	572	314	18	54.72	8.85
chr12	41405753	41406348	596	265	30	109.55	10.65
chr12	41473098	41473685	588	285	18	55.04	7.03
chr12	41788216	41788828	613	377	22	55.35	7.41
chr12	41928798	41929519	722	317	26	68.19	6.72
chr12	42353000	42353578	579	330	23	73.52	7.69
chr12	42354230	42354753	524	357	19	52.05	6
chr12	42628499	42629301	803	428	41	142.6	11.9
chr12	42654023	42654876	854	501	85	400	18.2
chr12	42987609	42988149	541	153	19	64.92	6.19
chr12	43141373	43141825	453	168	19	71.96	8.95
chr12	43167873	43168457	585	258	19	51.99	7.91
chr12	43458533	43458977	445	151	15	56.76	8.29
chr12	43830410	43831023	614	272	17	53.31	9.43
chr12	43928398	43928868	471	273	15	55.96	7.86
chr12	44189683	44190317	635	212	31	148.88	19.65
chr12	44976224	44976675	452	309	16	53.09	5.75
chr12	45627901	45628513	613	346	22	77.92	10.94
chr12	45673840	45674537	698	287	34	99.63	11.34
chr12	45981439	45981953	515	358	22	91.04	14.22
chr12	45989818	45990689	872	408	207	1141.65	33.21
chr12	46017578	46018221	644	212	52	241.35	16.91
chr12	46212711	46213323	613	419	22	59.82	6.09
chr12	46258228	46258745	518	206	19	66.39	9.43
chr12	46381259	46382050	792	367	41	145.8	15.28
chr12	46573372	46573831	460	239	28	87.06	7.77
chr12	46849830	46850677	848	412	106	513.4	28.01
chr12	46887484	46887953	470	212	36	156.4	11.75
chr12	47186617	47187231	615	459	26	70.54	7.36
chr12	47308750	47309243	494	344	21	66.75	8.11
chr12	47328953	47329416	464	316	16	53.94	7.99
chr12	47346465	47347017	553	293	22	66.94	6.72
chr12	47357549	47358209	661	278	23	58.62	6.11
chr12	47373400	47373924	525	259	16	50.7	8.53
chr12	47481962	47482460	499	201	16	50	7.45
chr12	47582355	47583117	763	382	47	155.7	13.87
chr12	47607983	47608434	452	147	15	53.4	7.19
chr12	47670109	47670624	516	358	24	96.08	12.79
chr12	47718053	47718657	605	410	21	51.02	5.27
chr12	47734668	47735164	497	357	18	62.13	7.33
chr12	48407524	48408028	505	204	16	51.62	8.35
chr12	48415414	48416139	726	490	91	504.36	23.63
chr12	48588471	48588836	366	218	14	51.43	7.59
chr12	48879801	48880472	672	300	27	69.01	10.88
chr12	49049086	49049631	546	221	18	66.31	7.03
chr12	49161029	49161752	724	348	21	56.8	6.88
chr12	49294957	49295504	548	293	16	53.55	8.6
chr12	49581694	49582311	618	190	71	414.36	28.08
chr12	49720978	49721450	473	128	15	54.11	8.39
chr12	49938417	49939061	645	380	30	90.31	6.98
chr12	49945924	49946395	472	329	17	61.68	6.96
chr12	50069464	50070124	661	283	25	59.46	6.38
chr12	50119279	50119664	386	155	17	58.66	5.41
chr12	50135446	50136183	738	327	29	83.62	11.87
chr12	50197527	50198475	949	416	169	735.68	24.49
chr12	50400920	50401764	845	534	31	59.09	4.22
chr12	50581335	50582164	830	672	28	69.03	5.18
chr12	50796173	50796638	466	207	23	75.9	6.87
chr12	50926288	50926990	703	479	28	102.48	8.35
chr12	50932704	50933151	448	135	15	58.7	9.43
chr12	50966265	50966802	538	236	18	61.96	7.91
chr12	51028994	51029480	487	155	20	61.85	6.49
chr12	51159032	51159899	868	431	49	186.12	16.37
chr12	51419413	51420142	730	300	32	96.92	13.41
chr12	51492130	51492713	584	238	29	63.08	6.08
chr12	51536496	51537151	656	293	21	51.42	6.33
chr12	51779921	51780737	817	397	35	95.38	10.13
chr12	51820959	51821537	579	203	23	54.9	6.47
chr12	51850413	51851039	627	304	22	51.92	7.2
chr12	51911947	51912434	488	232	37	151.37	13.26
chr12	51922317	51922935	619	391	34	105.11	9.67
chr12	52217333	52218623	1291	905	148	592.38	23.13
chr12	52391652	52392162	511	239	18	55.37	6.14
chr12	52509518	52509980	463	321	15	52.73	8
chr12	52540977	52541829	853	410	72	276.81	20.59
chr12	52542379	52543100	722	295	45	130.23	9.04
chr12	52596889	52597731	843	435	34	117.6	7.99
chr12	52641097	52641628	532	157	29	109.44	11.6
chr12	52674032	52674666	635	339	29	79.45	7.45
chr12	52738464	52739211	748	314	38	114.99	10.39
chr12	52765337	52766034	698	545	31	71.02	6.29
chr12	53010848	53011629	782	418	44	147.17	10.95
chr12	53247001	53247801	801	330	28	65.27	6.38
chr12	53288836	53289591	756	246	64	257.1	14.24
chr12	53356286	53356647	362	207	17	82.8	11.17
chr12	53363604	53364308	705	154	34	65.02	5.5
chr12	53365633	53366194	562	343	65	296.73	18.18
chr12	53397883	53398651	769	317	74	343.16	19.99
chr12	53436284	53436953	670	409	23	53.34	5.75
chr12	53551433	53552387	955	447	127	571.78	29.52
chr12	53752498	53753270	773	388	38	141.43	15.52
chr12	54218930	54219619	690	343	37	124.93	10.88
chr12	54343184	54343943	760	391	38	138.73	13.81
chr12	54371542	54372249	708	396	69	402.83	20.72
chr12	54377059	54377728	670	218	91	572.46	35.9
chr12	54383986	54384562	577	287	85	580.81	30.44
chr12	54431685	54432546	862	409	62	243.05	18.54
chr12	54781149	54781762	614	391	23	91.86	7.86
chr12	55189351	55189953	603	298	22	86.4	10.22
chr12	55285807	55286229	423	285	18	83.7	11
chr12	55327085	55327870	786	347	109	596.79	33.15
chr12	55624430	55624936	507	133	16	52.63	5.69
chr12	56025850	56026543	694	374	21	62.83	7.19
chr12	56268274	56268676	403	277	17	53.17	7.2
chr12	56312615	56313251	637	361	30	123.31	15.49
chr12	56362062	56362508	447	148	15	58.82	7.07
chr12	56387304	56388043	740	465	67	317.79	22.6
chr12	56550847	56551431	585	337	19	53.2	8.07
chr12	56552673	56553145	473	318	23	92.29	11.56
chr12	57321337	57321814	478	295	25	119.24	12.66
chr12	58116872	58117529	658	341	68	361.97	26.33
chr12	58311641	58312514	874	443	57	200.79	16.82
chr12	58710050	58710490	441	254	14	52.66	7.81
chr12	58920355	58920780	426	142	15	53.62	9.53
chr12	59057683	59058219	537	328	17	61.27	7.07
chr12	59105772	59106195	424	148	14	54.67	6.25
chr12	59529226	59529648	423	233	16	53.51	6.03
chr12	59577322	59577823	502	363	16	50.16	6.06
chr12	60135050	60135641	592	325	20	52.41	5.7
chr12	60135789	60136541	753	309	26	63.19	4.69
chr12	60918382	60918813	432	285	14	51.27	8.19
chr12	62123588	62124048	461	156	18	59.97	7.17
chr12	62400410	62401622	1213	438	39	54.59	4.19
chr12	62845055	62845435	381	154	19	70.64	7.38
chr12	63120841	63121321	481	293	19	60.89	8.06
chr12	63440869	63441719	851	416	42	120.49	12.66
chr12	63480026	63480985	960	486	156	692.47	27.64
chr12	63556300	63557035	736	578	34	94.54	7.14
chr12	63688457	63689202	746	372	25	50.31	5.89
chr12	63787922	63788470	549	305	24	71.28	7.59
chr12	64017921	64018478	558	338	20	78.57	9.43
chr12	64344119	64344577	459	311	18	72.99	10.18
chr12	64474891	64475391	501	330	98	635.92	25.59
chr12	64570877	64571580	704	408	25	50.69	4.65
chr12	64687247	64687938	692	362	19	57.53	8.64
chr12	64715110	64715580	471	314	20	59.64	8.1
chr12	65136160	65136688	529	183	17	52.98	5.39
chr12	65283603	65284193	591	234	26	80.95	9.04
chr12	65310619	65311015	397	152	20	62.58	7.13
chr12	65437410	65437920	511	298	37	153.62	13.66
chr12	65478142	65479081	940	643	34	55.8	5
chr12	65752810	65753383	574	237	19	51.99	6.57
chr12	65788045	65788703	659	402	22	77.98	10.81
chr12	65909593	65910127	535	219	18	50.31	7.1
chr12	65955683	65956178	496	310	29	99.39	10.7
chr12	66025381	66025879	499	182	18	50.68	5.55
chr12	66166097	66166657	561	195	19	51.11	5.75
chr12	66859610	66860741	1132	371	39	52.12	4.75
chr12	67669434	67669946	513	227	72	458.13	24.96
chr12	67823596	67824314	719	407	22	57.5	7.03
chr12	67829816	67830242	427	151	14	50.11	6.47
chr12	67877482	67878274	793	327	50	184.94	15.7
chr12	67915612	67916203	592	206	30	87.72	7.58
chr12	68114772	68115580	809	388	31	83	8.71
chr12	68156041	68156570	530	317	20	63.46	7.23
chr12	68495366	68495941	576	200	21	50.52	4.98
chr12	68558121	68558612	492	206	17	57.88	5.44
chr12	68677577	68678087	511	361	20	67.99	7.45
chr12	69198010	69198569	560	210	28	104.45	10.17
chr12	69358643	69359323	681	443	111	622.12	28.56
chr12	69430551	69431042	492	340	16	60.01	7.07
chr12	69461951	69462596	646	489	64	295.48	19.9
chr12	69619324	69619932	609	345	19	53.83	6.52
chr12	69833733	69834397	665	319	164	1041.21	31.91
chr12	69893553	69894035	483	157	18	61.97	6.46
chr12	70000601	70000982	382	155	15	52.45	7.76
chr12	70507048	70507632	585	193	21	65.88	8.86
chr12	70843053	70843697	645	321	23	74.39	9.99
chr12	71193305	71193853	549	403	19	56.6	7.99
chr12	71294336	71295023	688	270	24	64.99	5.86
chr12	71430854	71431347	494	157	19	53.61	6.33
chr12	71690168	71690745	578	167	22	58.75	6.28
chr12	72674891	72675310	420	186	16	52.86	7.1
chr12	72769673	72770115	443	191	20	70.2	8.33
chr12	72865472	72866057	586	352	21	54.26	6.44
chr12	73139005	73139563	559	337	21	56.32	5.8
chr12	74352951	74353576	626	328	22	54.89	5.36
chr12	74395881	74396309	429	155	14	53.44	8.49
chr12	74743605	74744219	615	238	19	55.87	8.85
chr12	74921927	74922576	650	354	26	64.03	6.23
chr12	75265526	75266140	615	271	36	166.81	14.7
chr12	76032323	76033135	813	417	29	56.67	10.63
chr12	76099724	76100977	1254	599	258	1038.69	27.57
chr12	76106019	76106635	617	275	26	50.57	5.75
chr12	76127860	76128379	520	366	37	171.36	16.88
chr12	76337548	76338691	1144	848	68	270.65	17.36
chr12	76371744	76372104	361	206	19	101.8	12.35
chr12	76446004	76446545	542	204	19	55.59	8.36
chr12	78145832	78146385	554	152	20	51.13	8.37
chr12	78370751	78371387	637	290	26	63.6	5.98
chr12	78588254	78588756	503	154	22	69.53	6.86
chr12	78780480	78781024	545	391	28	97.86	8.75
chr12	79087421	79088025	605	301	18	56.79	8.19
chr12	79613261	79613779	519	313	15	50.77	7.07
chr12	79751122	79751630	509	246	17	51.06	5.64
chr12	79915406	79915938	533	256	58	319.88	17.76
chr12	79926486	79927005	520	367	18	53.14	8.44
chr12	79951298	79951755	458	314	15	50.35	6.19
chr12	80163257	80163842	586	216	37	120.55	11.36
chr12	80388059	80388542	484	147	17	55.75	6.46
chr12	80511557	80512100	544	197	17	53.24	8.35
chr12	80654057	80655043	987	545	84	317.13	18.73
chr12	80985563	80986174	612	357	23	59.9	5.23
chr12	80992797	80993297	501	147	18	51.5	7.35
chr12	81191802	81192280	479	292	19	64.86	7.91
chr12	81317484	81318034	551	359	19	58.26	6.33
chr12	81603391	81604238	848	441	61	209.38	17.69
chr12	81711653	81712303	651	363	21	51.33	7.41
chr12	82475765	82476372	608	298	22	60.02	6.16
chr12	82796786	82797195	410	256	14	51.58	6.4
chr12	83045199	83045590	392	168	16	58.12	7.49
chr12	83390142	83390604	463	151	18	64.01	6.39
chr12	84272252	84272938	687	413	31	109.86	12.06
chr12	84567169	84567754	586	276	20	53.65	6.33
chr12	84858562	84859392	831	417	34	95.29	8.11
chr12	84886327	84886630	304	152	16	55.78	7.5
chr12	84991512	84992210	699	420	24	55.76	7.38
chr12	85887250	85887815	566	410	20	50.29	7.38
chr12	85949297	85950183	887	389	34	70.07	5.92
chr12	85974155	85974883	729	354	67	258.45	17.48
chr12	85981335	85982037	703	301	25	62.97	9.28
chr12	86175703	86176374	672	246	22	63.08	5.81
chr12	86488324	86488795	472	324	16	50.7	5.75
chr12	86783556	86784046	491	297	15	53.72	7.86
chr12	86883137	86883584	448	188	18	79.79	11
chr12	86891098	86891638	541	384	18	67.28	11
chr12	87506695	87507124	430	188	23	110.08	10.21
chr12	87525747	87526161	415	134	14	56.08	7.07
chr12	87708438	87708954	517	370	16	50.32	6.26
chr12	87743066	87743498	433	147	15	51.75	9.8
chr12	87833958	87834297	340	200	14	63.1	8.83
chr12	88218683	88219228	546	304	17	50.55	6
chr12	88480543	88480893	351	219	15	60.77	7.03
chr12	88494246	88494680	435	295	15	60.32	7.07
chr12	88640929	88641453	525	216	21	75.26	10.33
chr12	88754163	88754540	378	152	22	99.78	10.45
chr12	88771913	88772343	431	215	14	51.38	5.96
chr12	88792097	88792480	384	217	15	67.33	9.43
chr12	89144472	89144950	479	181	26	112.87	12.17
chr12	89466713	89467496	784	389	62	245.85	19.57
chr12	89603866	89604484	619	306	22	73.11	6.12
chr12	89858555	89859348	794	375	270	1708.7	38.98
chr12	89900766	89901630	865	166	44	189.16	12.38
chr12	90101703	90102176	474	280	32	147.68	13.94
chr12	90485341	90485868	528	264	17	62.3	9.43
chr12	90774108	90774707	600	153	21	67	5.93
chr12	90808814	90809208	395	253	13	51.84	8.64
chr12	90813498	90813947	450	265	15	53.04	7.11
chr12	91031684	91032148	465	283	15	56.66	6.29
chr12	91046757	91047178	422	157	14	55.21	7.07
chr12	91876874	91877565	692	399	48	210.84	21.28
chr12	92221893	92222323	431	146	16	59.96	7.57
chr12	92685789	92686483	695	281	27	83.79	9.69
chr12	92987649	92988131	483	261	16	57.96	7.45
chr12	93301433	93301898	466	310	14	50.17	7.07
chr12	93437406	93437848	443	320	14	51.81	6.17
chr12	93627578	93627966	389	213	14	59.45	8.64
chr12	93935548	93936092	545	326	20	62.21	8.52
chr12	93957521	93958044	524	299	18	69.35	8.64
chr12	94091632	94092536	905	280	172	908.49	31.25
chr12	94204646	94205197	552	367	28	129.54	14.93
chr12	94247759	94248285	527	351	35	171.56	14.47
chr12	94347978	94348803	826	524	227	1365.82	33.98
chr12	94453427	94454063	637	244	19	62.92	7.86
chr12	94852584	94853056	473	146	16	59.16	7.45
chr12	95048855	95049337	483	157	16	55.99	7.91
chr12	95069729	95070351	623	321	26	80.08	9.99
chr12	95427276	95427727	452	281	14	51.71	5.5
chr12	95491923	95492878	956	368	111	529.37	25.61
chr12	95599079	95599639	561	406	20	71.81	10.07
chr12	95711822	95712325	504	201	20	81.21	9.57
chr12	95734544	95735029	486	143	15	50.77	6.62
chr12	96441923	96442537	615	440	26	112.87	11.72
chr12	96717594	96718039	446	274	19	87.59	10.22
chr12	97783988	97784720	733	323	38	137.62	15.41
chr12	97894259	97894989	731	291	79	409.61	24.54
chr12	97962253	97963031	779	412	64	262.26	17.22
chr12	98026889	98027472	584	289	18	51.55	7.91
chr12	98095619	98096134	516	231	61	378.67	23.61
chr12	98218768	98219359	592	313	20	59.27	7.59
chr12	98478148	98478803	656	320	19	60.99	7.86
chr12	98621987	98622364	378	144	14	57.51	8.83
chr12	99172090	99172648	559	201	18	64.01	7.72
chr12	99250889	99251309	421	265	18	81.96	11.44
chr12	99828786	99829151	366	219	17	74.21	7.91
chr12	99902661	99903072	412	229	16	51.53	6.96
chr12	100060197	100060826	630	321	19	63.27	9.38
chr12	100160035	100160621	587	323	19	68.38	8.64
chr12	100533246	100533898	653	372	20	67.37	8.64
chr12	101346484	101346815	332	143	16	66.41	8.87
chr12	101407821	101408367	547	174	20	72.81	9.24
chr12	102002060	102002553	494	270	23	93.64	11.62
chr12	102090928	102091376	449	199	19	85.81	10.81
chr12	102378221	102378680	460	156	17	51.97	6.33
chr12	102573038	102573456	419	271	21	102.01	10.91
chr12	102845306	102845700	395	183	13	51.84	8.64
chr12	102915626	102915947	322	173	16	63.37	9.22
chr12	102942295	102942881	587	240	147	984.8	29.63
chr12	102957810	102958184	375	157	15	68.68	9.43
chr12	102990389	102990962	574	221	19	60.31	6.81
chr12	103125792	103126186	395	237	13	51.84	7.86
chr12	103342834	103343328	495	215	21	87.92	12.23
chr12	103569159	103570003	845	393	78	352.49	22.78
chr12	103715770	103716281	512	359	16	57.72	8.64
chr12	103766928	103767379	452	108	17	69.3	7.53
chr12	103868813	103869217	405	154	16	58.74	8.86
chr12	103953202	103953619	418	282	16	69.63	8.64
chr12	104193188	104193822	635	284	18	52.43	8.73
chr12	104235552	104235954	403	246	16	71.84	11.79
chr12	104415917	104416367	451	316	15	51.82	6.29
chr12	104961202	104961832	631	329	18	50.13	6.96
chr12	105060408	105060891	484	341	16	52.77	6.81
chr12	105071531	105071891	361	153	13	56.22	9.43
chr12	105156940	105157479	540	326	18	55.04	8.4
chr12	105169396	105170023	628	456	37	162.45	13.14
chr12	105334537	105335010	474	154	17	64.17	10.18
chr12	105408335	105409068	734	266	37	160.49	13.76
chr12	105494478	105495044	567	410	26	103.42	13.05
chr12	106273046	106273434	389	201	14	50.42	7.25
chr12	106672818	106673687	870	360	49	191.86	15.26
chr12	108159146	108159629	484	221	15	54.49	7.86
chr12	108261944	108262430	487	146	16	60.6	6.29
chr12	108400820	108401160	341	136	15	55.11	7.28
chr12	108928020	108928568	549	200	22	79.12	9.79
chr12	108995574	108996076	503	243	22	85.2	9.69
chr12	109748250	109748801	552	298	19	72.57	11.79
chr12	109834154	109834634	481	199	41	255.42	19.53
chr12	111564268	111564914	647	391	20	61.13	6.4
chr12	111602848	111603463	616	288	19	65.14	7.86
chr12	113100374	113100885	512	145	18	70.87	11.79
chr12	113364243	113364646	404	154	18	86.87	12.57
chr12	113659401	113660145	745	393	50	260.6	26.26
chr12	114621575	114622037	463	128	14	50.49	7.07
chr12	114966391	114967055	665	332	18	54.31	8.64
chr12	115539744	115540168	425	219	32	190.89	20.1
chr12	115835976	115836513	538	331	18	64.16	8.19
chr12	115948119	115948577	459	319	14	50.93	6.29
chr12	116056643	116057215	573	324	25	104.38	12.23
chr12	116307582	116308674	1093	599	322	1667.62	32.39
chr12	116736818	116737241	424	156	20	99.18	10.22
chr12	116827857	116828858	1002	531	318	1750.42	38.11
chr12	116933020	116933665	646	254	172	1202.93	37.4
chr12	117353109	117353574	466	166	22	97.4	9.74
chr12	117354004	117354403	400	199	15	55.86	8.66
chr12	117678119	117678711	593	252	20	74.18	10.22
chr12	117809368	117810084	717	429	65	357.9	26.42
chr12	118164504	118164913	410	194	14	56.7	8.64
chr12	118378876	118379418	543	165	24	107.19	12.2
chr12	119608793	119609621	829	429	126	693.66	31.99
chr12	119781836	119782286	451	302	15	51.53	6.25
chr12	119991406	119991763	358	213	16	75.05	10.3
chr12	120083178	120083864	687	369	24	81.67	10.79
chr12	120148036	120148579	544	274	19	73.57	9.43
chr12	120517309	120518280	972	763	48	183.46	18.17
chr12	120729094	120729541	448	293	14	52.16	7.07
chr12	121002957	121003362	406	255	14	56.28	7.72
chr12	121665064	121665552	489	232	30	170.46	14.06
chr12	122186319	122187422	1104	643	400	2211.57	40.41
chr12	122643413	122643839	427	252	14	54.61	8.64
chr12	122832878	122833209	332	181	13	58.87	8.39
chr12	122853094	122853740	647	325	38	195.91	18.4
chr12	122976520	122977511	992	577	62	255.63	18.71
chr12	123519265	123519706	442	233	16	66.29	8.64
chr12	123544579	123545229	651	429	102	482.08	19.91
chr12	123547221	123547848	628	435	76	294.65	11.85
chr12	123554220	123555139	920	466	103	508.78	23.34
chr12	123580174	123580602	429	261	14	54.37	7.86
chr12	123917350	123918017	668	319	20	65.79	10.22
chr12	123992819	123993226	408	254	13	50.29	6.29
chr12	124093638	124094235	598	335	47	261.71	23.19
chr12	124625722	124626326	605	266	17	51.04	7.45
chr12	124702230	124702968	739	439	32	124.51	13.91
chr12	124877261	124878141	881	451	94	429.85	26.96
chr12	124878618	124879370	753	343	36	77.46	10.99
chr12	124895097	124895569	473	292	78	570.29	28.02
chr12	125152346	125152751	406	141	13	50.25	8.6
chr12	125184386	125184840	455	285	15	57.84	8.64
chr12	125215000	125215778	779	361	40	194.81	17.29
chr12	125226626	125226973	348	156	16	80.87	11.79
chr12	125230241	125230780	540	389	20	80.97	9.43
chr12	125273772	125274253	482	149	18	69.77	7.27
chr12	125312661	125313313	653	271	22	80.1	10.22
chr12	125322755	125323116	362	197	29	197.07	18.08
chr12	125360174	125360914	741	375	23	76.48	11
chr12	125478415	125478929	515	125	39	237.54	26.92
chr12	125934853	125935284	432	279	14	52.47	6.86
chr12	127427811	127428256	446	295	14	50.26	6.78
chr12	128444411	128444806	396	259	13	51.72	7.86
chr12	128918222	128918687	466	168	14	50.17	7.07
[truncated: 7,722 more rows]

## Sheet: MCF-7-TamR-E2
# This file is generated by MACS version 1.4.2 20120305
# ARGUMENTS LIST:
# name = 177
# format = BAM
# ChIP-seq file = /mnt/g/data/gse86538/chip-seq/sam_bam/SRR4190177.sorted.bam
# control file = None
# effective genome size = 2.70e+09
# band width = 300
# model fold = 10,30
# pvalue cutoff = 1.00e-05
# Large dataset will be scaled towards smaller dataset.
# Range for calculating regional lambda is: 10000 bps
# tag size is determined as 45 bps
# total tags in treatment: 36690486
# tags after filtering in treatment: 4900322
# maximum duplicate tags at the same position in treatment = 1
# Redundant rate in treatment: 0.87
# d = 97
chr	start	end	length	summit	tags	#NAME?	fold_enrichment
chr1	567487	567672	186	93	12	114.07	30.17
chr1	569835	570065	231	92	26	290.71	62.86
chr1	956992	957143	152	76	7	92.29	34.36
chr1	993688	993946	259	185	6	50.54	11.45
chr1	1008911	1009884	974	305	337	1918.45	34.01
chr1	1014771	1015408	638	115	33	192.14	19.03
chr1	1015596	1016083	488	240	22	120.66	17.18
chr1	1060664	1060962	299	160	9	78.07	22.91
chr1	1071944	1072199	256	90	8	87.37	34.08
chr1	1080819	1081059	241	145	6	63.82	28.4
chr1	1167175	1167420	246	155	6	55.28	12.89
chr1	1310419	1310661	243	123	6	56.83	17.93
chr1	1342546	1342792	247	159	8	66.76	18.74
chr1	1368446	1368778	333	90	10	83.06	29.46
chr1	1406864	1407129	266	71	7	73.21	22.72
chr1	1553869	1554121	253	74	13	111.37	20.12
chr1	1608181	1608358	178	89	19	232.71	54.41
chr1	1690195	1690940	746	481	63	390.45	21.76
chr1	1724894	1725261	368	200	24	213.54	37.72
chr1	2066996	2067121	126	63	6	104.26	28.12
chr1	2159266	2159428	163	81	6	69.35	22.09
chr1	2282277	2282559	283	90	19	204.42	53.32
chr1	2343260	2343525	266	191	6	51.94	16.49
chr1	2457489	2457841	353	215	8	57.48	20.62
chr1	2533722	2533921	200	64	6	69.21	28.4
chr1	2615511	2615770	260	90	7	73.97	34.08
chr1	2702375	2702637	263	88	7	65.85	26.89
chr1	2783082	2783480	399	188	12	119.08	45.44
chr1	3254871	3255107	237	148	10	92.23	25.77
chr1	3398897	3399173	277	94	10	102.09	32.8
chr1	3585425	3585712	288	87	6	58.73	22.72
chr1	3593783	3594163	381	249	17	131.38	30.93
chr1	3625537	3625793	257	147	6	52.9	12.37
chr1	3748839	3749018	180	90	6	70.09	34.08
chr1	3841058	3841288	231	80	6	62.25	20.62
chr1	4468990	4469264	275	136	7	72.12	28.4
chr1	4555841	4556038	198	92	6	69.5	28.4
chr1	5373037	5373357	321	95	18	177.93	30.93
chr1	6062099	6062377	279	77	6	54.18	23.43
chr1	6086948	6087170	223	135	6	66.06	28.4
chr1	6119048	6119359	312	168	7	58.98	21.48
chr1	6159608	6159756	149	74	6	50.22	12.13
chr1	6161067	6161493	427	256	21	145.18	22.24
chr1	6265974	6266308	335	84	9	89.6	45.44
chr1	6280471	6280600	130	65	6	97.77	34.08
chr1	6305107	6305393	287	194	6	52.15	22.41
chr1	6319678	6319951	274	190	8	73.05	20.62
chr1	6406595	6406861	267	85	6	55.42	18.74
chr1	6452197	6452466	270	91	7	63.62	17.18
chr1	6499399	6499658	260	92	13	131.65	40.5
chr1	6531984	6532195	212	92	6	55.13	18.41
chr1	6543118	6543368	251	182	7	73.62	21.7
chr1	6614935	6615220	286	203	7	70.83	22.72
chr1	7019468	7020088	621	260	62	407.39	29.76
chr1	7020328	7020870	543	397	25	105.24	12.33
chr1	7288698	7289118	421	208	10	72.83	25.77
chr1	7326264	7326484	221	87	6	58.31	21.48
chr1	7507719	7508445	727	334	348	2414.47	38.99
chr1	7586979	7587164	186	93	6	70.09	34.08
chr1	7600859	7601251	393	216	90	888.82	55.27
chr1	8086242	8086737	496	169	45	363.06	47.46
chr1	8254581	8254919	339	156	14	71.41	12.54
chr1	8257897	8258464	568	243	54	355.99	26.6
chr1	8272055	8272304	250	92	6	62.77	28.4
chr1	8301852	8302115	264	137	6	52.15	16.49
chr1	8318984	8319601	618	440	24	153.88	18.04
chr1	8451340	8451602	263	118	12	124.26	37.11
chr1	8763348	8763735	388	134	18	155.73	37.49
chr1	8939221	8939605	385	205	8	59.45	23.79
chr1	9173084	9173467	384	135	11	106.15	32.56
chr1	9360186	9360500	315	221	11	77.5	22.09
chr1	9363084	9363523	440	216	19	136.29	23.98
chr1	9376076	9376394	319	229	10	85.63	34.36
chr1	9385895	9386295	401	161	37	344.03	48.39
chr1	9399651	9399912	262	172	6	54.7	17.93
chr1	9885665	9885932	268	135	8	60.75	17.18
chr1	9903637	9903882	246	154	7	70.99	29.46
chr1	9923059	9923437	379	109	32	283.08	50.54
chr1	10010392	10010945	554	271	81	676	52.69
chr1	10078695	10078957	263	126	15	165.03	45.36
chr1	10461009	10461331	323	205	8	58.33	16.11
chr1	10490401	10490611	211	104	6	67.66	22.72
chr1	10659775	10659956	182	91	6	70.09	34.08
chr1	10735021	10735335	315	237	8	63.94	14.73
chr1	10812457	10812795	339	175	115	1180.82	60.74
chr1	11327803	11328064	262	140	12	131.37	42.17
chr1	11352771	11353167	397	253	12	109.1	37.49
chr1	11434217	11434933	717	422	105	736.37	45.26
chr1	11854441	11854809	369	191	8	65.31	17.93
chr1	12035387	12035601	215	126	7	77.03	30.93
chr1	12104737	12104964	228	51	6	65.42	22.72
chr1	12289954	12290127	174	87	6	68.76	32.56
chr1	12538229	12538635	407	165	13	86.35	18.04
chr1	12545676	12545985	310	188	14	70.69	10.06
chr1	12546232	12546907	676	454	50	318.67	29.46
chr1	12588205	12588711	507	251	13	118.18	28.4
chr1	12609274	12610258	985	519	245	1490.2	41.88
chr1	12660181	12660891	711	376	160	1110.17	38.18
chr1	12676068	12676280	213	124	10	93	23.56
chr1	14084330	14084655	326	156	8	78.42	22.72
chr1	14254999	14255143	145	72	6	97.77	34.08
chr1	14609134	14609470	337	120	10	99.85	43.41
chr1	14869158	14869404	247	161	7	70.86	24.55
chr1	15240272	15240679	408	258	133	1247.77	56.29
chr1	15303689	15304311	623	232	188	1427.79	43.97
chr1	15352043	15352322	280	148	11	124.12	51.12
chr1	15374831	15375470	640	324	99	758.73	39.01
chr1	15498707	15499032	326	127	13	114.71	30.93
chr1	15611446	15611788	343	247	17	165.17	33.14
chr1	15697141	15697396	256	54	7	69.69	19.64
chr1	15735833	15736081	249	174	7	61.27	18.41
chr1	15789630	15789929	300	207	20	202.1	49.98
chr1	15809598	15809751	154	77	8	110.71	31.72
chr1	16034235	16034545	311	235	7	63.37	19.64
chr1	16126527	16126868	342	262	15	115.43	22.63
chr1	16305350	16305606	257	71	6	60.67	21.7
chr1	16339391	16339668	278	193	12	119.18	31.72
chr1	16339776	16340021	246	79	7	64.04	23.79
chr1	16500085	16500360	276	91	6	57.18	25.77
chr1	16502340	16502626	287	82	7	67.55	20.62
chr1	16528253	16528529	277	90	6	59.83	28.4
chr1	16568897	16569047	151	75	6	83.68	34.08
chr1	16678772	16679117	346	192	9	68.06	20.62
chr1	16934686	16935334	649	284	120	747.07	37.29
chr1	16971008	16971468	461	220	12	67.26	16.78
chr1	17034914	17035691	778	504	54	296	30.93
chr1	17287051	17287280	230	156	6	65.16	28.4
chr1	17356070	17356293	224	86	7	78.89	34.08
chr1	17386158	17386364	207	94	7	62.66	28.12
chr1	17563677	17564385	709	395	238	1642.37	47.84
chr1	17577104	17577539	436	195	18	156.7	35.55
chr1	17631037	17631459	423	198	12	78.94	16.72
chr1	17641148	17641767	620	286	154	1231.08	49.95
chr1	17666921	17667203	283	199	6	59.22	22.72
chr1	17846624	17847531	908	570	164	1008.16	44.58
chr1	17855852	17856314	463	223	41	371.67	48.39
chr1	17877544	17877800	257	119	6	56.5	18.74
chr1	17886338	17886624	287	143	11	94.91	22.55
chr1	17904148	17904468	321	89	11	81.63	27.49
chr1	18308385	18308659	275	211	6	54.59	18.74
chr1	18609759	18610047	289	67	7	64.24	23.43
chr1	18710617	18710868	252	90	9	101.37	39.76
chr1	18767338	18767590	253	160	6	58.26	19.64
chr1	18956215	18956474	260	180	6	60.33	21.7
chr1	18995321	18995625	305	130	8	66.39	19.09
chr1	19170907	19171139	233	112	7	77.59	28.4
chr1	19337041	19337421	381	183	16	127.8	22.91
chr1	19680917	19681353	437	257	22	148.16	22.91
chr1	19683071	19683346	276	128	15	112.74	19.45
chr1	19752329	19752595	267	177	19	167.6	27.92
chr1	19753738	19754115	378	121	20	150.26	23.63
chr1	19835455	19835858	404	245	10	93.75	34.08
chr1	19908724	19909060	337	154	10	101.93	34.08
chr1	19922933	19923873	941	388	189	1179.37	50.52
chr1	19933647	19933893	247	177	6	61.8	21.7
chr1	19943081	19943303	223	76	6	53.7	18.41
chr1	19946319	19946623	305	158	16	158.2	35.55
chr1	19967164	19967413	250	95	6	57.28	18.74
chr1	20252148	20252315	168	84	6	68.76	32.56
chr1	20683706	20684083	378	275	40	321.71	31.62
chr1	20685275	20685461	187	93	11	74.32	15.53
chr1	20931120	20931398	279	141	20	211.12	48.32
chr1	20940202	20940475	274	206	6	51.12	16.49
chr1	20940718	20941053	336	200	9	73.4	19.09
chr1	20963933	20964273	341	197	7	56.16	21.48
chr1	21063894	21064046	153	76	6	82.15	32.56
chr1	21595027	21595372	346	187	46	428	54.77
chr1	21650876	21651425	550	367	29	194.87	26.73
chr1	21662262	21662576	315	134	9	62.49	18.99
chr1	21841210	21841702	493	228	16	118.31	22.55
chr1	21960467	21960781	315	76	16	124.06	15.69
chr1	21965592	21965915	324	108	19	143.99	21.4
chr1	22102433	22102958	526	222	16	146.08	41.24
chr1	22283176	22283582	407	247	13	130.81	39.76
chr1	22531431	22531650	220	163	7	66.45	34.08
chr1	22555004	22555318	315	92	8	72.63	23.43
chr1	22582131	22582644	514	219	23	94.71	12.19
chr1	22586078	22586883	806	200	47	249.81	19.33
chr1	22739165	22739719	555	134	32	200.69	30.13
chr1	22740733	22741157	425	274	17	94.22	15.21
chr1	22761207	22761482	276	147	6	55.8	19.64
chr1	22762521	22762734	214	130	7	61.71	28.12
chr1	22799036	22799576	541	211	47	379.29	39.52
chr1	22912978	22913178	201	117	7	82.5	34.08
chr1	22952436	22952866	431	163	75	711.2	57.83
chr1	23177261	23177420	160	80	7	69.45	18.5
chr1	23449946	23450228	283	90	28	298.6	51.55
chr1	23778563	23778789	227	91	6	65.54	28.4
chr1	23857344	23857733	390	93	15	107.11	17.6
chr1	24542837	24543282	446	92	20	167.93	24.99
chr1	24648416	24648584	169	84	7	76.65	22.55
chr1	24743435	24743622	188	94	6	64.53	28.12
chr1	24889273	24889520	248	94	9	82.74	21.33
chr1	24896802	24897328	527	313	38	262.07	37.9
chr1	24969329	24969561	233	87	7	62.27	21.33
chr1	25004997	25005290	294	208	11	121.67	39.76
chr1	25051312	25051495	184	92	7	82.15	37.98
chr1	25071348	25071748	401	185	13	97.72	15.62
chr1	25096226	25096533	308	225	11	103.5	32.99
chr1	25273067	25273287	221	72	6	66.32	28.4
chr1	25424793	25424990	198	54	6	69.5	22.72
chr1	25870418	25870668	251	179	6	57.17	18.74
chr1	25893305	25893590	286	104	22	161.81	18.88
chr1	25894763	25895283	521	358	21	97.53	11.15
chr1	26034721	26035126	406	236	32	273.8	42.45
chr1	26083418	26084015	598	335	51	416.64	37.98
chr1	26100039	26100313	275	88	6	55.9	24.55
chr1	26146222	26146520	299	225	7	53.55	29.46
chr1	26146821	26147093	273	87	7	67.59	29.46
chr1	26628339	26628616	278	87	6	59.73	22.72
chr1	26826854	26827154	301	169	12	114.93	27.76
chr1	26925401	26925678	278	75	7	71.76	22.72
chr1	27110567	27110810	244	72	6	53.26	15.86
chr1	27286185	27286451	267	49	6	59.58	27.13
chr1	27468186	27468416	231	109	7	77.87	28.4
chr1	27481518	27481761	244	148	8	80.36	26.89
chr1	27518572	27518805	234	123	14	156.01	47.58
chr1	27648475	27648912	438	118	13	123.94	27.13
chr1	27704097	27704352	256	185	6	57.93	19.64
chr1	27868491	27869304	814	311	48	261.49	22.47
chr1	27884508	27884840	333	163	21	164.53	33.62
chr1	27890159	27890459	301	175	11	79.64	19.64
chr1	27928282	27928604	323	142	10	72.24	16.72
chr1	27971551	27972015	465	116	26	230.07	26.51
chr1	28099617	28099808	192	122	6	70.09	28.4
chr1	28640659	28640854	196	88	6	69.79	22.72
chr1	28806117	28806318	202	119	8	96.25	39.76
chr1	28846667	28847193	527	220	43	326.24	38.66
chr1	28853565	28853886	322	72	9	89.35	32.56
chr1	29432278	29432561	284	83	6	59.12	22.72
chr1	29554099	29554412	314	135	9	82.58	26.89
chr1	29557376	29557582	207	93	6	61.39	22.41
chr1	30151963	30152199	237	81	6	50.08	13.75
chr1	30163612	30163869	258	73	7	74.22	22.72
chr1	30530691	30530976	286	75	6	58.92	22.72
chr1	30775967	30776278	312	204	13	127.67	41.24
chr1	30805884	30806151	268	155	6	55.32	18.74
chr1	30818244	30818577	334	164	69	685.6	53.89
chr1	30870874	30871499	626	311	58	425.19	21.99
chr1	30934500	30935033	534	228	59	459.06	50.26
chr1	31279945	31280198	254	92	6	50.07	18.41
chr1	31296874	31297105	232	94	6	63.6	21.7
chr1	31659454	31659733	280	95	11	104.4	26.73
chr1	31711545	31711736	192	96	6	70.09	28.4
chr1	31841546	31842051	506	241	32	261.51	42.75
chr1	31970500	31970718	219	134	6	66.58	28.4
chr1	32296321	32296647	327	169	15	143.07	36.82
chr1	32308532	32308857	326	129	21	213.69	56.53
chr1	32479063	32479377	315	89	7	67.68	22.72
chr1	32560416	32560591	176	88	7	83.68	39.76
chr1	32787396	32787648	253	94	7	71.67	30.93
chr1	32798417	32798776	360	180	27	220.07	35.61
chr1	32886181	32886428	248	82	6	63	28.4
chr1	33219764	33220025	262	90	7	58.52	17.77
chr1	33282902	33283193	292	209	9	83.8	34.36
chr1	33359221	33359496	276	213	6	52.05	17.18
chr1	34126014	34126376	363	232	32	302.94	51.55
chr1	34412298	34412914	617	313	100	647.87	39.65
chr1	34414307	34414651	345	208	35	175.26	15.86
chr1	35154180	35154414	235	142	6	64.55	28.4
chr1	35253538	35253888	351	91	10	76.29	23.28
chr1	35291063	35291713	651	364	95	689.49	40.88
chr1	35308823	35309471	649	403	73	523.31	28.82
chr1	35331883	35332153	271	178	12	116.58	40.5
chr1	35497160	35497436	277	197	9	97.44	34.08
chr1	35544788	35545035	248	156	6	63	28.4
chr1	36184302	36184801	500	235	18	154.56	39.65
chr1	36430986	36431137	152	76	7	97.77	39.76
chr1	36598797	36599016	220	169	7	66.45	34.08
chr1	36621688	36621907	220	163	6	54.08	18.41
chr1	36669097	36670144	1048	733	141	830.48	53.64
chr1	36703295	36703470	176	88	6	70.09	34.08
chr1	36795158	36795837	680	328	69	488.9	43.16
chr1	36802390	36802765	376	158	18	153.61	35.35
chr1	36923481	36923765	285	94	6	50.02	16.49
chr1	36952594	36952993	400	164	17	153.81	29.46
chr1	37504172	37504618	447	255	46	397.84	46.56
chr1	37579985	37580223	239	60	6	64.06	22.72
chr1	37945406	37945703	298	157	9	58.12	16.04
chr1	38078494	38078971	478	255	32	256.81	48.11
chr1	38258931	38259430	500	216	222	1925.47	62.03
chr1	38273367	38273537	171	85	6	70.09	34.08
chr1	38589051	38589639	589	423	39	280.16	31.99
chr1	39608453	39608820	368	182	12	115.6	29.46
chr1	39633384	39633912	529	241	21	175.98	46.21
chr1	39670790	39671073	284	91	6	59.12	22.72
chr1	39721040	39721410	371	82	20	194.87	46.21
chr1	40839281	40839613	333	243	9	89.85	39.76
chr1	41178064	41178318	255	161	7	62.88	23.79
chr1	41269605	41269911	307	216	13	126.34	39.65
chr1	41343015	41343262	248	157	6	63	28.4
chr1	41364956	41365489	534	269	22	136.7	27.49
chr1	41389164	41389736	573	326	114	847.27	50.17
chr1	41707504	41707786	283	117	7	71.18	22.72
chr1	41819533	41819785	253	163	6	61.11	16.28
chr1	41944971	41945144	174	87	6	62.03	25.77
chr1	41966207	41966436	230	92	9	77.05	20.05
chr1	41970220	41970522	303	208	7	52.86	17.18
chr1	41980070	41980357	288	167	7	53.42	16.63
chr1	42137908	42138174	267	122	7	62.67	20.62
chr1	42154436	42154600	165	82	7	90.54	32.8
chr1	42175817	42176154	338	247	15	138.6	31.99
chr1	42185271	42185621	351	96	20	188.48	37.49
chr1	42243996	42244313	318	206	14	105.81	31.5
chr1	42255079	42256001	923	422	159	955.37	40
chr1	42325932	42326331	400	145	27	212.35	29.18
chr1	42331901	42332406	506	181	84	549.3	33.72
chr1	42333877	42334266	390	139	49	282.33	18.87
chr1	42631137	42631405	269	182	7	62.43	20.62
chr1	42631631	42631892	262	176	7	63.27	20.62
chr1	42800860	42801127	268	174	8	82.06	30.93
chr1	43273968	43274379	412	159	11	91.34	25.77
chr1	43282638	43282902	265	184	6	61.1	28.4
chr1	43403441	43403800	360	193	21	158.36	25.77
chr1	43424380	43424696	317	192	10	78.01	15.62
chr1	43432775	43433102	328	236	9	84.5	34.36
chr1	43438988	43439466	479	191	42	378.44	63.12
chr1	43457916	43458497	582	329	164	1242.13	44.91
chr1	43459290	43459569	280	137	24	87.29	8.68
chr1	43601774	43602008	235	103	8	80.18	25.77
chr1	44116098	44116378	281	213	7	71.41	22.72
chr1	44296478	44296871	394	214	77	736.94	56.13
chr1	44412637	44412911	275	188	6	60.04	22.72
chr1	44457034	44457280	247	156	6	61.8	27.13
chr1	44509446	44509799	354	95	14	121.56	27.49
chr1	44509818	44510129	312	92	8	63.03	17.77
chr1	44526661	44527107	447	228	18	157.49	33.14
chr1	44533119	44533953	835	326	311	2039.51	44.23
chr1	44678997	44679198	202	107	7	69.22	22.91
chr1	44794059	44794422	364	281	12	85.19	16.28
chr1	44834272	44834540	269	196	6	56.52	19.64
chr1	45040093	45040530	438	208	54	486.4	46.16
chr1	45174180	45174466	287	193	7	70.72	28.4
chr1	45218662	45218928	267	56	6	60.88	22.72
chr1	45265509	45265685	177	88	6	70.09	34.08
chr1	45273411	45273686	276	195	8	55.16	15.09
chr1	45476887	45477122	236	144	6	64.42	28.4
chr1	45671779	45671945	167	83	6	68.76	32.56
chr1	45769351	45769834	484	254	15	66.35	7.93
chr1	45770390	45770700	311	133	42	407.71	48.32
chr1	45795214	45795509	296	95	9	83.24	25.77
chr1	45805936	45806168	233	88	6	64.79	17.04
chr1	45982521	45982864	344	121	51	430.07	38.8
chr1	45984990	45985289	300	151	17	83.82	11.23
chr1	46050417	46050593	177	88	8	94.12	41.24
chr1	46216233	46216508	276	80	6	55.8	19.64
chr1	46268475	46268728	254	179	7	74.73	22.72
chr1	46628918	46629092	175	87	7	83.68	39.76
chr1	46637660	46637888	229	123	7	60.69	16.63
chr1	46648847	46649124	278	163	6	59.73	17.04
chr1	46777500	46777725	226	93	6	65.67	28.4
chr1	46871714	46871992	279	71	12	135.91	48.83
chr1	47083039	47083301	263	57	6	61.31	22.72
chr1	47943701	47944063	363	269	11	85.15	29.93
chr1	48022541	48022762	222	149	6	66.19	28.4
chr1	48131615	48131794	180	90	6	62.03	25.77
chr1	48360324	48360765	442	166	62	555.8	56.97
chr1	48386623	48387042	420	283	23	201.13	45.82
chr1	49147046	49147557	512	219	41	319.78	41.24
chr1	49207154	49207561	408	201	10	86.8	29.46
chr1	49224341	49224901	561	258	64	496.16	44.37
chr1	50654738	50655011	274	183	9	97.9	45.44
chr1	50798773	50798946	174	87	6	62.03	25.77
chr1	51425914	51426192	279	202	7	71.65	22.72
chr1	51772436	51773042	607	327	85	685.41	48.18
chr1	51786905	51787530	626	367	177	1323.57	41.34
chr1	51794969	51795475	507	184	40	255.27	24.55
chr1	51795869	51796278	410	286	18	88.96	14.73
chr1	52007347	52007886	540	259	75	648.3	46.39
chr1	52033361	52033771	411	192	25	244.03	49.88
chr1	52521796	52521989	194	94	6	60.86	20.62
chr1	52606861	52607129	269	89	7	62.43	20.62
chr1	53092599	53092804	206	50	6	68.35	28.4
chr1	53124451	53124730	280	87	6	59.53	22.72
chr1	53163571	53163860	290	203	14	122.6	25.77
chr1	53168853	53169027	175	87	6	70.09	34.08
chr1	53760957	53761121	165	82	8	112.32	45.44
chr1	54042630	54042822	193	75	6	64.53	23.43
chr1	54690628	54690815	188	94	6	62.03	25.77
chr1	54953959	54954235	277	200	9	74.32	22.55
chr1	54954928	54955039	112	56	7	125.7	21.87
chr1	55005293	55005449	157	78	8	100.63	34.36
chr1	55894784	55895410	627	236	25	183.55	25.77
chr1	55985615	55985894	280	179	8	84.04	34.08
chr1	56245760	56246373	614	272	51	377.18	40.01
chr1	56986932	56987178	247	141	7	75.66	28.4
chr1	57021002	57021364	363	272	15	149.15	49.31
chr1	57154166	57154436	271	83	12	129.54	42.17
chr1	57253807	57254527	721	510	41	265.41	34.95
chr1	57276884	57277429	546	247	53	415.48	58.91
chr1	57471967	57472225	259	84	6	61.75	22.72
chr1	57530171	57530460	290	210	7	70.38	28.4
chr1	57890196	57890528	333	166	9	78.48	25.77
chr1	58028482	58029052	571	281	45	375.37	51.55
chr1	58071289	58071488	200	150	6	67.88	21.7
chr1	58290239	58290508	270	93	8	85.39	28.4
chr1	58505243	58505486	244	151	7	76.06	28.4
chr1	59042731	59043165	435	302	14	98.3	14.32
chr1	59049709	59050021	313	224	17	180.45	45.36
chr1	59058273	59058587	315	138	15	153.02	45.36
chr1	59165270	59165578	309	227	7	65.15	20.62
chr1	59212071	59212328	258	93	6	61.86	22.72
chr1	59281884	59282100	217	168	6	56.56	15.86
chr1	59351068	59351259	192	90	6	70.09	28.4
chr1	59676810	59677051	242	79	6	51.42	14.73
chr1	59681560	59681854	295	170	7	59.47	20.62
chr1	60593354	60593680	327	115	11	101.22	43.41
chr1	60993885	60994173	289	52	6	58.63	22.72
chr1	61428884	61429279	396	218	16	142.43	44.18
chr1	61608885	61609081	197	75	6	66.83	25.77
chr1	61681271	61681710	440	284	93	848.12	59.74
chr1	61759616	61760041	426	83	18	146.25	30.32
chr1	61813923	61814169	247	85	6	58.94	19.64
chr1	61825114	61825322	209	91	6	61.11	22.41
chr1	62108004	62108469	466	346	20	152.3	27.13
chr1	62207905	62208340	436	252	13	96.55	19.95
chr1	62320204	62320386	183	91	6	68.76	32.56
chr1	62328543	62328754	212	136	6	66.19	27.13
chr1	63650879	63651046	168	84	7	87.29	30.07
chr1	63914474	63914631	158	79	6	83.68	34.08
chr1	64166918	64167141	224	91	7	71.08	26.89
chr1	64653392	64653552	161	80	6	77.28	28.12
chr1	65007747	65008029	283	200	6	56.47	20.62
chr1	65456382	65456677	296	201	14	128.55	38.66
chr1	65532450	65532746	297	88	7	68.11	27.13
chr1	66001944	66002211	268	90	6	59.47	27.13
chr1	66397781	66398054	274	68	6	60.14	22.72
chr1	66732014	66732246	233	153	9	104.64	39.76
chr1	67390976	67391247	272	85	8	70.52	22.91
chr1	67896353	67896586	234	90	6	64.67	28.4
chr1	68074730	68075157	428	220	30	261.37	54.12
chr1	68080037	68080546	510	307	16	72.45	9.82
chr1	68084301	68084662	362	221	36	303.83	38.07
chr1	68453053	68453344	292	227	10	108.45	34.08
chr1	71769279	71769540	262	171	6	61.42	17.04
chr1	71914227	71914913	687	207	148	1079.97	40.37
chr1	71927192	71927435	244	150	10	88.23	27.29
chr1	71928837	71929233	397	238	10	64.61	17.18
chr1	72211474	72211730	257	164	7	74.35	28.4
chr1	72382559	72382908	350	255	9	53.75	9.59
chr1	72384135	72384720	586	356	19	110.2	18.04
chr1	72468783	72469115	333	154	57	502.15	42.51
chr1	72472350	72472637	288	164	14	71.48	11.85
chr1	72540595	72540829	235	50	6	64.55	28.4
chr1	74992428	74992882	455	239	16	121.65	31.24
chr1	75118044	75118738	695	380	189	1374.55	34.04
chr1	75138972	75139182	211	87	7	80.88	34.08
chr1	76051399	76051849	451	233	13	102.35	26.73
chr1	76525197	76525556	360	88	17	154.07	29.93
chr1	77409784	77410233	450	203	13	114.02	18.74
chr1	77497106	77497336	231	147	6	65.04	17.04
chr1	77827393	77827681	289	90	6	58.63	28.4
chr1	79266290	79267008	719	423	101	737.75	45.92
chr1	79393461	79393936	476	295	15	137.31	29.46
chr1	79626822	79627030	209	92	7	74.82	28.12
chr1	79853580	79853883	304	229	7	65.68	30.93
chr1	82365872	82366109	238	85	6	64.18	17.04
chr1	83629730	83629980	251	130	7	75.13	28.4
chr1	84133169	84133516	348	194	17	161.49	31.99
chr1	84972295	84972561	267	78	8	85.8	28.4
chr1	85155731	85155949	219	89	6	65.26	27.13
chr1	85225341	85225849	509	265	129	1112.54	61.71
chr1	85300185	85300473	289	218	6	58.63	22.72
chr1	85313008	85313245	238	78	10	117.83	39.76
chr1	85744394	85744748	355	166	25	224.67	43.16
chr1	85763513	85764261	749	186	82	562.28	44.64
chr1	86016667	86016856	190	95	6	59.74	23.79
chr1	86016922	86017251	330	88	9	72.67	22.09
chr1	86046197	86046459	263	169	9	69.55	18.99
chr1	86072614	86073369	756	247	41	263.29	25.32
chr1	86107886	86108159	274	178	23	255.28	64.43
chr1	86288326	86288848	523	259	75	632.15	63.99
chr1	86296230	86296682	453	176	61	550.59	57.27
chr1	87666737	87666945	209	117	6	67.93	22.72
chr1	88300744	88301009	266	95	10	110.62	43.41
chr1	88759387	88759877	491	274	14	115.26	34.36
chr1	88975114	88975352	239	89	9	103.58	45.44
chr1	89149678	89149937	260	171	6	61.64	22.72
chr1	89989920	89990253	334	246	7	62.64	20.62
chr1	90071281	90071565	285	170	12	112.03	24.88
chr1	90208982	90209138	157	78	6	83.68	34.08
chr1	90308999	90309225	227	74	6	65.54	22.72
chr1	90918924	90919188	265	173	9	99.28	34.08
chr1	91316834	91317057	224	79	7	78.89	34.08
chr1	91491894	91492312	419	210	11	81.5	24.88
chr1	91505776	91505952	177	88	8	97.77	45.44
chr1	91551406	91551568	163	81	6	83.68	34.08
chr1	91565357	91566304	948	621	315	1912.84	32.65
chr1	92215253	92215670	418	262	28	271.16	54.58
chr1	92234332	92234721	390	226	83	775.16	59.05
chr1	92239313	92239709	397	233	17	84.97	16.49
chr1	92241456	92241696	241	92	10	88.78	24.26
chr1	92351686	92351960	275	94	7	61.72	20.62
chr1	92875239	92875513	275	93	14	124.17	22.29
chr1	93459594	93459923	330	232	29	296.77	55.51
chr1	93544538	93544768	231	158	6	65.04	28.4
chr1	94050577	94050909	333	157	13	139.8	48.83
chr1	94074894	94075276	383	181	14	133.01	26.89
chr1	94080191	94080320	130	65	7	120.53	34.36
chr1	94135774	94135969	196	78	6	69.79	28.4
chr1	94245132	94245675	544	315	41	333.79	41.63
chr1	94264670	94265191	522	275	18	128.64	32.4
chr1	94312746	94313309	564	87	20	148.13	21.87
chr1	94374283	94374707	425	135	27	225.26	43.81
chr1	94888591	94888886	296	171	28	250.66	36.17
chr1	95082990	95083405	416	154	27	239.89	36.08
chr1	95220222	95220447	226	170	6	62.88	20.62
chr1	95590426	95590701	276	161	6	57.18	20.62
chr1	96630069	96630345	277	186	6	59.83	28.4
chr1	97030160	97030284	125	62	6	104.26	28.12
chr1	97458834	97459088	255	164	6	62.2	28.4
chr1	98415646	98415860	215	164	6	67.11	28.4
chr1	100818051	100818401	351	159	10	91.43	23.43
chr1	100916901	100917157	257	154	9	84.2	22.91
chr1	101491540	101491778	239	150	6	62.74	21.7
chr1	104502306	104502536	231	60	7	63.68	22.09
chr1	105617759	105618005	247	163	13	143.6	51.55
chr1	107009668	107009983	316	142	12	51.85	8.29
chr1	107098178	107098792	615	173	19	53.22	6.38
chr1	107151806	107152204	399	227	18	53.96	10.69
chr1	107599135	107599480	346	149	21	93.66	14.1
chr1	107599891	107600453	563	93	22	64.96	6.33
chr1	107839258	107839476	219	135	10	51.84	10.43
chr1	108060529	108060816	288	195	8	74.28	22.41
chr1	108206104	108206322	219	123	6	53.23	17.77
chr1	108298863	108299386	524	327	93	718.21	41.73
chr1	108383116	108383295	180	90	9	90.05	29.93
chr1	108397162	108397506	345	164	43	396.67	48.42
chr1	108479035	108479672	638	446	83	593.76	34.69
chr1	108560474	108560734	261	190	6	52.47	16.49
chr1	108577085	108577352	268	178	11	92.53	25.77
chr1	108741712	108742280	569	278	114	774.46	35.53
chr1	108857177	108857641	465	241	18	101.32	16.28
chr1	108877539	108877847	309	123	8	52.99	10.57
chr1	109419576	109419949	374	194	12	79.97	20.12
chr1	109464983	109465219	237	164	6	50.08	13.75
chr1	109505768	109506158	391	246	14	99.87	18.5
chr1	109582937	109583176	240	75	7	61.32	17.77
chr1	109633171	109633559	389	115	15	127.24	24.05
chr1	109638863	109639329	467	218	25	143.16	15.75
chr1	109642593	109643028	436	211	14	60.83	11.78
chr1	109693713	109694350	638	356	131	887.74	43.86
chr1	109723912	109724282	371	191	12	101.88	19.09
chr1	109741805	109742123	319	169	16	143.96	36.39
chr1	109782389	109783173	785	503	91	502.95	33.16
chr1	109788716	109789406	691	308	186	1299.55	46.6
chr1	109817176	109818145	970	377	64	314.08	17.88
chr1	109825850	109826143	294	67	9	73.21	16.63
chr1	109940286	109940586	301	235	9	67.48	20.62
chr1	110048631	110048863	233	139	7	64.58	19.09
chr1	110070132	110070448	317	89	8	57.9	18.74
chr1	110193484	110193684	201	112	7	79.27	30.93
chr1	110268145	110268406	262	193	7	58.52	21.33
chr1	110325876	110326310	435	207	10	65.73	22.55
chr1	110370681	110371095	415	245	18	119.16	32.99
chr1	110425265	110425552	288	151	7	53.42	16.63
chr1	110527279	110527587	309	83	12	79.53	17.6
chr1	110548450	110549095	646	285	62	408.05	32.15
chr1	110617703	110618067	365	269	21	167.96	33.62
chr1	110662579	110662872	294	94	10	81.31	24.99
chr1	110752863	110753178	316	84	15	117.44	28.77
chr1	110880654	110881322	669	446	21	114.07	21.93
chr1	110949911	110950518	608	95	30	212.44	20.17
chr1	111025888	111026062	175	87	10	104.37	26.43
chr1	111104119	111104311	193	111	6	55.68	17.18
chr1	111154939	111155363	425	262	46	381.52	42.11
chr1	111641953	111642183	231	90	8	71.44	19.95
chr1	111739960	111740138	179	89	6	52.17	18.19
chr1	111746489	111746715	227	84	11	100.59	22.91
chr1	111769733	111769832	100	50	6	126.46	24.74
chr1	111970289	111970566	278	189	8	63.63	12.89
chr1	112056104	112056483	380	178	29	253.59	34.36
chr1	112146674	112146845	172	86	6	67.28	30.93
chr1	112281996	112282340	345	249	12	95.2	24.99
chr1	112298041	112298195	155	77	6	73.06	24.74
chr1	112355982	112356254	273	197	6	60.25	22.72
chr1	112429339	112429790	452	145	45	270.19	20.62
chr1	112462639	112463028	390	300	19	100.73	16.07
chr1	112479816	112480256	441	247	13	51.27	9.89
chr1	112521246	112521877	632	289	85	449.95	27.37
chr1	112533195	112534292	1098	646	57	156.92	14.42
chr1	113007074	113007306	233	94	6	56.81	21.48
chr1	113162291	113162453	163	81	6	73.06	24.74
chr1	113247313	113247671	359	176	11	63.47	10.31
chr1	113256172	113256612	441	242	29	178.83	20.33
chr1	113261373	113261542	170	85	9	84.04	19.74
chr1	113360593	113360779	187	93	6	70.09	34.08
chr1	113931430	113931607	178	89	7	71.77	27.76
chr1	114077318	114077576	259	182	7	51.21	16.72
chr1	114354404	114355429	1026	625	51	168.84	8.81
chr1	114447438	114448340	903	500	35	97.52	10.22
chr1	114471797	114472316	520	427	18	58.63	10.74
chr1	114472429	114472694	266	94	16	89.44	12.33
chr1	114519017	114519863	847	393	235	1363.97	45
chr1	114575888	114576222	335	206	12	62.01	9.37
chr1	114592368	114592616	249	58	9	58.02	9.55
chr1	114642275	114642396	122	61	7	76.28	10.31
chr1	114685802	114686197	396	171	12	56.32	11.45
chr1	114889132	114889600	469	189	20	70.65	12.53
chr1	115017428	115017558	131	65	8	83.54	13.75
chr1	115052755	115053157	403	73	18	68.56	8.75
chr1	115300027	115300291	265	169	15	81.86	14.73
chr1	115571740	115571942	203	95	6	51.74	15.62
chr1	115636262	115636419	158	79	6	50.84	12.37
chr1	115709255	115709526	272	87	10	72.17	18.74
chr1	115711337	115711648	312	218	11	80.24	25.77
chr1	115721986	115722655	670	436	57	378.01	33.95
chr1	115860265	115860642	378	214	16	117.88	19.64
chr1	115866279	115866748	470	341	13	72.39	13.75
chr1	115954383	115954703	321	200	8	57.47	15.62
chr1	116164800	116165077	278	206	7	50.74	11.78
chr1	116197604	116197937	334	194	9	65.7	15.62
chr1	116255630	116256156	527	224	28	136.88	17.77
chr1	116257065	116257574	510	196	19	68.88	8.96
chr1	116268306	116268528	223	83	6	50.86	16.63
chr1	116353619	116354072	454	277	26	105.11	15.59
chr1	116358344	116358743	400	135	52	357.45	32.92
chr1	116495242	116495647	406	147	23	172.58	30.93
chr1	116551310	116551654	345	183	19	145.24	25.25
chr1	116553325	116553655	331	238	11	62.84	13.12
chr1	116582450	116582764	315	125	8	61.49	17.18
chr1	116652808	116653282	475	221	13	70.69	17.93
chr1	116687125	116687369	245	95	7	52.95	16.72
chr1	116810748	116811198	451	214	22	128.86	26.96
chr1	116854615	116855279	665	465	44	222.29	15.52
chr1	116872208	116872505	298	116	19	127.5	21.78
chr1	116872900	116873215	316	67	13	72.34	9.23
chr1	116915280	116915517	238	77	10	50.35	8.49
chr1	116915555	116915913	359	143	13	52.17	7.03
chr1	116916332	116917036	705	202	19	52.93	7.28
chr1	117034810	117035235	426	207	82	665.96	43.71
chr1	117113611	117113836	226	61	9	73.54	18.04
chr1	117161754	117162132	379	202	30	266.23	36.51
chr1	117185911	117186191	281	185	10	81.98	21.22
chr1	117195424	117195669	246	112	7	64.04	19.83
chr1	117206998	117207269	272	136	9	59.14	12.89
chr1	117302989	117303323	335	248	8	61.75	22.09
chr1	117396313	117396710	398	177	15	80.04	15.27
chr1	117401650	117401897	248	95	28	278.3	36.27
chr1	117435167	117435359	193	70	6	59.74	19.83
chr1	117462560	117462810	251	93	12	104.45	27.13
chr1	117503940	117504101	162	81	6	55.56	14.39
chr1	117560687	117561049	363	157	42	341.04	41.24
chr1	117602056	117602340	285	86	10	77.66	19.5
chr1	117665064	117665186	123	61	6	86.27	18.19
chr1	117753543	117753848	306	120	10	62.6	14.73
chr1	117841195	117841342	148	74	6	55.56	14.39
chr1	117845686	117845845	160	80	6	57.06	15.09
chr1	117909244	117909418	175	87	7	57.06	17.6
chr1	118105286	118105728	443	236	11	54.18	10.31
chr1	118105877	118106111	235	142	9	64	14.73
chr1	118134858	118135315	458	254	14	71.19	11.25
chr1	118174951	118175540	590	153	63	383.54	17.62
chr1	118189184	118189457	274	84	6	53.44	17.93
chr1	118358622	118358838	217	126	7	59.46	15.16
chr1	118659587	118660372	786	174	30	166.77	23.79
chr1	118869756	118870145	390	203	10	86.73	23.43
chr1	118886076	118886307	232	149	6	64.92	28.4
chr1	119010437	119010656	220	144	7	66.45	28.4
chr1	119354575	119354917	343	161	7	53.79	28.4
chr1	119874263	119874530	268	106	6	56.63	19.64
chr1	119931113	119931376	264	164	6	53.29	17.18
chr1	119934246	119934454	209	93	6	57.62	15.86
chr1	120085134	120085525	392	269	11	91.77	20.62
chr1	120109050	120109400	351	260	9	78.07	31.38
chr1	120333388	120333795	408	256	22	171.06	34.36
chr1	120561928	120562113	186	93	25	299.95	57.27
chr1	120612145	120612358	214	136	6	63.04	19.64
chr1	121138587	121138844	258	116	7	74.22	28.4
chr1	121354239	121354390	152	76	8	77.15	15
chr1	121357943	121358121	179	89	14	143.34	30.71
chr1	121478573	121478756	184	92	18	196.99	47.58
chr1	121484044	121485493	1450	781	818	3100	13.81
chr1	142661192	142661461	270	187	6	52.67	17.18
chr1	143651152	143651305	154	77	6	83.68	34.08
chr1	144066379	144066623	245	169	6	63.35	22.72
chr1	144529691	144530207	517	174	18	95.03	12.89
chr1	144597688	144598051	364	214	11	89.89	22.09
chr1	144598720	144599028	309	220	8	65.93	22.91
chr1	144891873	144892205	333	107	14	88.14	18.41
chr1	144931693	144932301	609	444	32	105.26	8.66
chr1	144989331	144989847	517	342	20	56.15	10.31
chr1	145208869	145209227	359	250	14	91.51	16.83
chr1	145217040	145217194	155	77	9	108.31	25.77
chr1	145246271	145246629	359	92	30	249.16	39.1
chr1	145438178	145438508	331	180	11	69.01	12.89
chr1	145485510	145485726	217	91	7	58.53	17.67
chr1	145507798	145508053	256	76	9	59.14	16.17
chr1	145527823	145528092	270	189	10	76.62	18.04
chr1	145547120	145547384	265	76	11	61.36	8.71
chr1	145589289	145589524	236	135	12	101.2	23.98
chr1	145654123	145654438	316	220	18	142.72	17.18
chr1	145663238	145663463	226	60	7	53.03	12.89
chr1	145687171	145687406	236	94	9	78.32	21.22
chr1	145694427	145694826	400	287	18	124.93	21.48
chr1	145726436	145727062	627	283	271	2018.39	42.22
chr1	146542244	146542530	287	71	6	50.96	17.18
chr1	146673455	146673723	269	191	7	56.61	13.75
chr1	146697000	146697430	431	211	8	55.5	23.79
chr1	146709077	146709233	157	78	7	74.43	21.22
chr1	146714051	146714434	384	155	14	92.55	22.91
chr1	146814555	146814822	268	202	6	50.64	11.9
chr1	146874389	146874634	246	166	6	53.03	11.9
chr1	146987233	146987491	259	105	7	53.86	15.16
chr1	147010764	147011181	418	198	24	129.05	21.83
chr1	147042863	147043307	445	224	10	61.01	14.73
chr1	147099223	147099520	298	202	8	54.24	13.22
chr1	147123328	147123665	338	140	33	286.55	33.8
chr1	147188943	147189565	623	343	21	66.58	8.87
chr1	147191856	147192264	409	237	28	160.76	25.2
chr1	147241221	147241414	194	87	6	55.68	17.18
chr1	147381248	147381543	296	161	11	76.15	20.17
chr1	147789434	147789676	243	162	10	95.53	31.99
chr1	148176178	148176560	383	189	10	96.15	28.4
chr1	148241448	148241686	239	90	10	117.64	45.44
chr1	148560003	148560455	453	231	30	202.43	32.31
chr1	149035301	149035564	264	83	7	73.46	28.4
chr1	149223297	149223642	346	207	15	103.43	21.04
chr1	149223668	149224085	418	327	15	91.73	12.62
chr1	149764104	149764336	233	93	9	77.66	20.62
chr1	149871039	149871387	349	95	9	56.59	15.46
chr1	149887474	149887791	318	105	13	92.19	15.69
chr1	149911348	149911614	267	82	10	56.54	9.52
chr1	149968051	149968429	379	175	9	58.54	14.73
chr1	149982235	149982555	321	229	10	51.65	11.83
chr1	149989171	149989958	788	436	115	671.73	27.03
chr1	150104411	150104666	256	164	7	55.16	18.74
chr1	150241222	150241611	390	233	12	87.34	18.19
chr1	150321539	150321833	295	92	8	57.38	14.32
chr1	150477209	150477442	234	143	9	62.61	12.13
chr1	150533822	150534246	425	248	12	53.06	8.18
chr1	150883698	150884054	357	173	7	52.21	15.86
chr1	150898655	150898967	313	219	9	60.76	12.89
chr1	150943545	150944156	612	329	39	178.99	17.18
chr1	150944210	150944683	474	307	21	72.29	7.3
chr1	150954188	150954910	723	198	52	236.12	19.72
chr1	150980602	150980916	315	241	11	56.94	14.06
chr1	151077728	151077986	259	177	7	57.81	13.75
chr1	151119045	151119218	174	87	9	82.2	18.94
chr1	151138225	151138662	438	258	18	104.37	16
chr1	151147823	151148111	289	197	7	50.44	12.13
chr1	151214409	151214680	272	188	7	51.42	11.78
chr1	151260474	151260727	254	74	8	50.51	10.11
chr1	151283981	151284350	370	220	25	187.02	26.21
chr1	151431846	151432060	215	90	8	53.64	13.12
chr1	151464385	151464603	219	80	6	50.48	16.11
chr1	151488523	151489396	874	569	170	894.78	31.75
chr1	151512699	151512900	202	80	8	50.58	11.28
chr1	151513049	151513359	311	92	10	51.63	8.18
chr1	151584327	151584560	234	90	8	50.73	13.12
chr1	151682572	151682948	377	182	11	52.56	11.83
chr1	151738930	151739297	368	215	17	117.95	28.87
chr1	151762387	151763175	789	310	78	438.85	29.21
chr1	151792755	151793012	258	176	8	55.85	11.99
chr1	151801500	151801731	232	93	10	63.67	14.73
chr1	151828069	151828510	442	289	20	119.1	15.46
chr1	151858033	151858218	186	93	10	87.98	23.98
chr1	151864030	151864187	158	79	7	66.78	17.18
chr1	151881840	151882457	618	494	28	173.76	15.56
chr1	151966114	151966759	646	205	29	102.24	10.7
chr1	151985504	151985856	353	257	9	52.57	14.06
chr1	151991832	151991996	165	82	6	54.13	13.75
chr1	151996247	151996394	148	74	6	50.22	12.13
chr1	152008743	152009337	595	388	29	132.98	14.39
chr1	152020248	152020969	722	555	25	83.71	9.37
chr1	152082521	152083043	523	267	16	70.92	11.45
chr1	152131595	152131929	335	246	13	51.82	8.68
chr1	152135323	152135762	440	223	44	298.99	24.96
chr1	152151557	152152205	649	332	59	369.08	31.14
chr1	152181167	152181421	255	163	6	50.97	19.09
chr1	152365356	152365792	437	239	14	68.09	13.52
chr1	152715486	152716392	907	304	99	550.08	41.08
chr1	153002897	153003267	371	155	18	156.89	33.35
chr1	153095416	153095862	447	250	17	138.25	23.28
chr1	153275597	153275839	243	158	7	60.92	17.77
chr1	153467451	153467911	461	327	21	155.41	31.91
chr1	153483491	153483907	417	160	48	395.86	42.05
chr1	153533844	153534031	188	94	6	50.58	17.18
chr1	153538835	153539517	683	82	24	120.54	14.47
chr1	153541245	153541544	300	92	9	50.32	9.37
chr1	153580741	153581098	358	89	13	73.36	17.77
chr1	153588719	153589004	286	208	17	142.02	26.89
chr1	153599750	153600100	351	178	11	78.37	16.72
chr1	153670100	153670340	241	93	7	57.07	15.62
chr1	153918325	153918731	407	187	12	65.99	12.37
chr1	153919036	153919483	448	170	14	69.48	8.89
chr1	153936596	153936879	284	163	11	60.2	10.61
chr1	153958725	153959002	278	77	7	55.57	17.18
chr1	154000142	154000375	234	80	6	55.54	16.49
chr1	154162821	154163546	726	351	132	885.46	51.23
chr1	154301673	154302203	531	286	30	178	23.56
chr1	154307385	154307771	387	198	8	57.94	19.09
chr1	154313014	154313358	345	89	10	70.58	11.45
chr1	154390831	154391268	438	154	16	100.62	17.55
chr1	154391983	154392294	312	173	10	62.65	17.18
chr1	154402836	154403120	285	64	6	57.72	27.13
chr1	154415718	154415924	207	136	6	65.4	20.62
chr1	154527233	154527396	164	82	9	83.11	19.33
chr1	154531420	154531779	360	168	10	69.97	17.67
chr1	154574251	154574485	235	64	7	68.12	17.18
chr1	154721628	154721914	287	209	6	54.7	19.64
chr1	154887220	154887561	342	165	10	63.41	14.39
chr1	154909005	154909210	206	120	12	86.06	17.18
chr1	154913918	154914254	337	156	22	149.49	17.93
chr1	154959421	154959540	120	60	6	95.74	22.91
chr1	154962502	154962775	274	188	6	52.25	17.18
chr1	154973153	154973833	681	590	35	134.73	11.45
chr1	154974040	154974399	360	171	15	54.63	10.5
chr1	155011472	155011737	266	182	10	79.51	21.7
chr1	155099773	155100105	333	89	12	52.16	10.06
chr1	155107523	155107706	184	92	8	68.53	20.62
chr1	155108238	155108609	372	169	9	56.11	16.28
chr1	155163374	155163678	305	146	8	52.57	15.46
chr1	155214386	155214802	417	243	18	130.05	28.77
chr1	155225044	155225291	248	117	9	62.71	12.89
chr1	155243259	155243469	211	128	7	63.32	13.3
chr1	155278347	155278618	272	192	6	57.59	20.62
chr1	155299904	155300134	231	93	8	60.55	12.27
chr1	156024377	156024624	248	73	8	58.06	12.27
chr1	156033274	156033568	295	73	9	69.41	15.16
chr1	156056007	156056598	592	236	37	201.78	19.41
chr1	156060637	156060960	324	138	13	69.51	11.95
chr1	156092402	156092839	438	229	16	68.74	10.57
chr1	156182673	156182926	254	84	6	59.54	25.77
chr1	156291514	156291754	241	87	9	89.98	28.87
chr1	156335882	156336073	192	75	7	69.35	22.09
chr1	156426772	156427389	618	374	23	131.38	20.21
chr1	156432063	156432418	356	197	12	93.57	28.12
chr1	156441283	156441829	547	288	18	106.65	18.33
chr1	156554836	156554992	157	78	6	63.05	18.19
chr1	156576139	156576304	166	83	6	66.04	19.95
chr1	156630077	156630243	167	83	15	164.43	30.93
chr1	156698026	156698418	393	218	13	88.48	24.99
chr1	156710714	156711302	589	187	15	89.61	17.18
chr1	156718348	156718716	369	236	23	117.18	17.53
chr1	156737043	156737458	416	219	13	100.98	30.93
chr1	157068396	157068786	391	237	10	74.51	17.77
chr1	157108063	157108441	379	203	11	83.1	23.28
chr1	157408114	157408649	536	357	18	111.43	16.78
chr1	157567728	157567932	205	94	6	64.28	24.55
chr1	157868016	157868279	264	170	7	65.72	26.89
chr1	158065337	158065564	228	145	7	62.97	17.77
chr1	158105186	158105338	153	76	6	77.28	28.12
chr1	159199466	159199682	217	123	8	93.56	34.08
chr1	159886084	159886375	292	202	10	62.89	14.15
chr1	159894263	159894625	363	151	10	57.24	8.77
chr1	159915787	159916112	326	237	9	81.05	31.38
chr1	159940671	159941057	387	238	13	93.36	25.08
chr1	160001509	160001775	267	83	7	52	11.78
chr1	160031357	160031644	288	90	11	94.74	28.99
chr1	160312925	160313193	269	75	7	50.89	11.45
chr1	160404666	160404991	326	178	11	91.87	27.49
chr1	160751062	160751334	273	87	6	53.55	17.93
chr1	160983582	160983841	260	92	7	64.84	25.77
chr1	161052352	161052539	188	94	9	67.7	17.18
chr1	161053219	161053617	399	309	21	144.51	18.74
chr1	161059312	161059455	144	72	6	61.28	12.62
chr1	161088627	161089051	425	214	37	325.66	43.62
chr1	161102079	161102302	224	85	6	65.93	22.72
chr1	161129202	161129538	337	209	11	99.1	28.87
chr1	161368333	161368757	425	222	12	71.24	19.18
chr1	161409663	161409933	271	77	7	59.72	19.09
chr1	161510007	161510279	273	95	6	60.25	22.72
chr1	161558864	161558994	131	65	11	163.97	27
chr1	161559113	161559675	563	312	24	168.32	39.27
chr1	161640988	161641357	370	248	11	100.78	37.49
chr1	161646880	161647055	176	88	8	92.29	39.27
chr1	161713057	161713281	225	79	7	78.74	34.08
chr1	161972831	161973049	219	94	7	58.24	17.67
chr1	162005354	162005581	228	108	6	55.16	15.86
chr1	162106537	162106819	283	92	7	62.11	25.77
chr1	162129158	162129700	543	263	98	778.53	48.56
chr1	162135458	162135652	195	79	6	64.38	23.43
chr1	162167215	162167466	252	170	7	53.81	11.78
chr1	162179977	162180243	267	171	7	60.2	19.09
chr1	162255096	162255392	297	155	10	107.68	39.76
chr1	162343791	162344052	262	84	6	52.36	12.37
chr1	162351260	162351477	218	95	8	87.92	29.46
chr1	162377988	162378190	203	107	8	82.63	27.76
chr1	162531725	162531971	247	93	7	61.53	18.41
chr1	162816604	162817010	407	217	27	224.65	49.09
chr1	163792429	163792660	232	83	6	63.6	27.13
chr1	164558251	164558643	393	217	11	68.37	10.06
chr1	164571367	164571575	209	89	7	71.96	21.48
chr1	164581094	164581448	355	213	8	66.7	17.93
chr1	165147864	165148106	243	152	6	58.09	18.74
chr1	165374818	165375079	262	83	8	81.1	29.46
chr1	165530234	165530483	250	154	6	62.77	28.4
chr1	165667650	165667814	165	82	6	83.68	34.08
chr1	165684600	165684845	246	69	7	66.63	21.48
chr1	165867040	165867320	281	127	6	53.98	14.06
chr1	166572670	166572906	237	154	7	66.52	20.62
chr1	166601577	166601782	206	94	6	56.96	19.09
chr1	166809996	166810415	420	131	30	233.89	36.82
chr1	166845163	166845496	334	199	8	56.08	12.5
chr1	166926485	166926753	269	92	6	51.63	20.62
chr1	167072965	167073125	161	80	6	73.06	24.74
chr1	167906574	167906875	302	213	11	92.45	25.77
chr1	168258871	168259117	247	165	6	56.36	13.45
chr1	168578418	168578706	289	130	9	80.97	23.79
chr1	168721951	168722147	197	78	6	58.23	19.09
chr1	168876293	168876776	484	293	27	204.42	35.1
chr1	169078115	169078401	287	101	19	131.56	16.2
chr1	169087713	169087927	215	80	7	68.41	23.79
chr1	169214901	169215295	395	210	9	54.85	16.72
chr1	169455337	169455512	176	88	8	82.92	30.55
chr1	169498607	169499009	403	134	34	302.15	30.93
chr1	169523934	169524110	177	88	6	59.74	23.79
chr1	169539457	169539712	256	186	7	56.13	12.89
chr1	169696260	169696446	187	93	6	59.74	23.79
chr1	169749299	169749513	215	138	6	61.58	23.43
chr1	169863280	169863578	299	225	9	63.51	18.5
chr1	170426773	170427094	322	218	8	60.76	28.12
chr1	170742558	170742901	344	179	9	73.96	19.83
chr1	171072859	171073104	246	86	7	64.04	23.79
chr1	171106332	171106567	236	66	6	56.45	17.18
chr1	171220594	171220816	223	129	6	54.73	19.09
chr1	171226459	171226757	299	172	11	77.76	21.09
chr1	171227701	171227961	261	93	16	141.59	26.37
chr1	171306737	171306988	252	73	6	58.37	24.55
chr1	171350686	171350838	153	76	6	83.68	34.08
chr1	171425156	171425442	287	235	6	56.07	15.46
chr1	171750516	171750823	308	168	13	101.7	20.62
chr1	172020650	172020846	197	125	6	66.83	25.77
chr1	172147065	172147282	218	103	9	94.11	28.87
chr1	172258955	172259225	271	162	6	52.56	12.89
chr1	172412897	172413238	342	166	8	54.22	15.16
chr1	172466529	172466744	216	150	8	63.79	12.57
chr1	172466930	172467144	215	149	7	54.6	12.89
chr1	172501880	172502180	301	80	9	77.8	30.55
chr1	172599739	172600449	711	355	138	947.34	51.24
chr1	172612158	172612419	262	113	17	168.61	44.18
chr1	172715398	172715976	579	272	63	463.15	30.81
chr1	173159844	173160068	225	150	8	72.4	19.95
chr1	173445853	173446301	449	324	85	706.82	55.51
chr1	173469038	173469235	198	83	9	85.43	24.26
chr1	173476076	173476358	283	107	7	57.18	18.41
chr1	173651463	173651663	201	79	7	67.05	21.33
chr1	173793862	173794128	267	93	6	50.75	19.83
chr1	173837314	173837917	604	255	37	250.01	25.77
chr1	173991507	173991869	363	195	10	77.73	14.22
chr1	174992599	174992862	264	118	7	58.28	17.77
chr1	175156023	175156709	687	450	89	579.29	46.86
chr1	175186961	175187216	256	88	8	77.03	21.48
chr1	175342987	175343164	178	89	6	51.36	17.67
chr1	175907765	175908191	427	88	13	81.13	14.73
chr1	176300087	176300328	242	121	10	112.6	41.24
chr1	176460934	176461259	326	95	10	89.02	32.99
chr1	176484439	176484652	214	85	6	65.92	27.13
chr1	176665262	176665492	231	90	9	66.29	17.55
chr1	176714519	176714719	201	107	6	58.73	19.83
chr1	176797571	176797827	257	168	7	58.05	20.62
chr1	176816785	176816925	141	70	6	74.43	18.19
chr1	177244115	177244329	215	95	6	52.79	17.18
chr1	177320511	177320767	257	170	10	81.02	21.7
chr1	177389057	177389322	266	176	7	55.92	13.3
chr1	177417435	177418515	1081	636	302	1656.07	44.14
chr1	177514584	177514762	179	89	7	80.44	36.08
chr1	177540839	177541313	475	233	25	189.21	34.36
chr1	177554725	177554968	244	148	16	154.89	35.27
chr1	177589806	177590046	241	93	8	67.65	15.62
chr1	177749817	177750060	244	88	6	57.97	23.43
chr1	177759618	177760152	535	279	30	206.21	41.24
chr1	178007890	178008104	215	130	7	67.18	22.91
chr1	178366775	178367002	228	68	6	50.25	13.3
chr1	178624702	178625142	441	101	26	213.27	28.77
chr1	178694659	178695632	974	426	140	801.54	48.11
chr1	178703877	178704150	274	78	6	58.84	27.13
chr1	178974733	178975080	348	112	24	216.8	34.36
chr1	179050838	179051137	300	84	8	54.01	15.86
chr1	179051143	179051292	150	75	10	118.12	27.13
chr1	179341312	179341623	312	201	10	84.38	21.33
chr1	179751216	179751520	305	69	7	61.07	17.93
chr1	179760420	179760708	289	95	6	57.33	21.7
chr1	179781367	179781610	244	88	7	54.82	17.67
chr1	179852115	179852407	293	138	9	72.08	22.55
chr1	180036320	180036601	282	201	10	78.12	19.5
chr1	180126511	180127040	530	447	14	62.31	12.89
chr1	180136745	180137532	788	469	125	757.25	31.3
chr1	180197642	180198208	567	184	78	473.58	31.83
chr1	180213816	180214390	575	278	57	424.82	40.97
chr1	180227311	180227491	181	90	6	52.17	18.19
chr1	180239009	180239311	303	185	17	136.27	21.93
chr1	180574752	180574981	230	136	8	84.2	32.8
chr1	180796406	180796694	289	153	6	54.5	19.64
chr1	180991482	180992039	558	182	15	82.16	16.78
chr1	181057467	181057744	278	182	8	50.22	10.97
chr1	181058917	181059226	310	168	13	98.62	19.64
chr1	181074322	181074557	236	90	10	83.63	21.15
chr1	181081574	181081948	375	234	17	100.54	16.36
chr1	181086718	181087143	426	245	27	137.47	11.45
chr1	181088460	181088793	334	245	16	73.85	9.87
chr1	181096105	181096562	458	135	27	166.59	23.56
chr1	181102626	181103064	439	292	45	280.11	24.85
chr1	181103715	181104405	691	167	34	129.45	8.84
chr1	181326164	181326359	196	93	9	78.26	20.12
chr1	181353521	181353743	223	74	6	50.86	16.63
chr1	181450752	181450919	168	84	6	53.87	19.33
chr1	181527661	181527920	260	69	9	66.07	14.73
chr1	181642156	181642314	159	79	6	77.28	28.12
chr1	182070611	182070858	248	78	6	63	22.72
chr1	182098207	182098524	318	113	11	91.49	29.93
chr1	182110103	182110441	339	212	11	80.01	16.72
chr1	182150484	182150770	287	195	13	123.93	24.88
chr1	182187137	182187405	269	126	10	99.48	34.36
chr1	182213621	182213920	300	130	29	305.52	48.97
chr1	182284414	182284650	237	94	14	146.28	34.36
chr1	182354177	182354443	267	201	7	59.04	14.73
chr1	182360305	182360786	482	230	20	126.83	18.56
chr1	182565826	182565949	124	62	7	105.73	24.88
chr1	182572976	182573273	298	132	12	85.65	13.45
chr1	182573379	182573575	197	102	7	55.82	14.73
chr1	182615984	182616150	167	83	7	68.53	18.04
chr1	182706935	182707152	218	123	6	61.18	18.74
chr1	182922606	182922998	393	146	19	147.15	34.36
chr1	182992809	182993446	638	298	188	1375.72	41.88
chr1	183176715	183176900	186	93	6	57.63	22.09
chr1	183218569	183219093	525	188	137	1139.77	59.75
chr1	183231881	183232333	453	238	58	486.99	48.83
chr1	183250670	183251258	589	432	90	671.19	46.21
chr1	183365097	183365384	288	66	6	52.05	13.45
chr1	183440499	183440725	227	82	9	51.72	11.78
chr1	183441258	183441830	573	334	23	111.07	17.93
chr1	183538347	183538621	275	138	27	226.56	31.84
chr1	183829414	183829591	178	89	7	59.48	18.99
chr1	183829682	183829957	276	89	9	68.7	13.93
chr1	183835433	183835680	248	76	6	51.75	15.27
chr1	183994441	183994679	239	160	8	57.33	18.74
chr1	184148862	184148992	131	65	6	92.29	29.46
chr1	184217284	184217411	128	64	6	106.2	29.46
chr1	184342381	184342565	185	92	10	107.32	36.82
chr1	184356208	184356566	359	274	9	58.48	16.72
chr1	184377720	184378157	438	187	19	120.29	31.12
chr1	184406497	184406754	258	179	8	71.12	22.09
chr1	184450490	184450758	269	176	8	61.62	20.62
chr1	184595576	184596302	727	393	147	1004.17	48.31
chr1	184723677	184723817	141	70	7	74.93	16.04
chr1	184772220	184772573	354	159	8	57.38	20.62
chr1	184789483	184789666	184	92	6	60.86	24.74
chr1	184807934	184808184	251	93	7	68.81	28.12
chr1	184831164	184831408	245	68	6	51.08	14.73
chr1	184943097	184943427	331	127	8	62.18	22.09
chr1	184986703	184986914	212	66	6	60.71	22.41
chr1	185286594	185286937	344	157	8	52.05	14.32
chr1	185554860	185555138	279	207	7	71.65	28.4
chr1	185614594	185615146	553	277	41	298.57	40.91
chr1	185643449	185643739	291	110	7	57.45	15.27
chr1	185717534	185717822	289	98	7	58.87	11.9
chr1	186201156	186201401	246	84	11	94.05	21.7
chr1	186631936	186632192	257	143	29	299.49	52.6
chr1	187328776	187328984	209	90	6	66.61	27.13
chr1	187460486	187460863	378	236	10	70.4	15.62
chr1	187624290	187624598	309	135	7	54.41	11.05
chr1	187657298	187657478	181	90	7	69.35	25.77
chr1	188067924	188068186	263	82	7	54.31	18.74
chr1	188401592	188401816	225	131	11	97.12	26.43
chr1	188799085	188799361	277	209	6	51.95	17.18
chr1	188844446	188844700	255	159	7	61.67	15.27
chr1	189346470	189346780	311	230	8	61.94	17.18
chr1	189482077	189482308	232	93	6	59.4	23.43
chr1	189678012	189678278	267	84	7	66.8	18.74
chr1	189688692	189689303	612	360	68	500.82	46.86
chr1	189845231	189845586	356	173	8	57.18	17.18
chr1	190095948	190096339	392	172	10	71.52	16.63
chr1	190763514	190763844	331	237	10	68.93	13.22
chr1	190914212	190914453	242	70	7	61.06	21.33
chr1	191151853	191152105	253	85	7	59.63	21.33
chr1	192043037	192043275	239	85	6	50.79	17.77
chr1	192186287	192186496	210	131	7	76.2	29.46
chr1	192368216	192368597	382	200	9	65.51	21.33
chr1	192394000	192394264	265	179	6	55.63	23.43
chr1	192559745	192559946	202	114	6	56.49	18.41
chr1	193053847	193054011	165	82	6	69.35	22.09
chr1	193090816	193091078	263	162	7	54.31	15.62
chr1	193434860	193435087	228	147	7	66.5	23.79
chr1	193801904	193802166	263	138	6	52.26	16.49
chr1	193888834	193889526	693	294	68	472.92	46.75
chr1	194036925	194037335	411	187	48	424	46.16
chr1	194429091	194429334	244	69	6	52.2	15.27
chr1	194484933	194485132	200	91	6	64.99	24.55
chr1	195309547	195309814	268	87	6	50.64	15.86
chr1	195977067	195977221	155	77	6	80.44	30.93
chr1	196692732	196692941	210	137	6	54.41	17.77
chr1	196976666	196976865	200	118	6	53.01	16.11
chr1	197439875	197440170	296	205	15	140.84	28.99
chr1	197454903	197455353	451	244	17	126.84	25.77
chr1	197871650	197872150	501	93	12	57.07	8.42
chr1	198126372	198126673	302	82	9	61.18	17.6
chr1	198128053	198128354	302	206	9	58.47	16.4
chr1	198240137	198240346	210	70	7	65.63	21.33
chr1	198465895	198466109	215	123	8	71.78	21.87
chr1	198503852	198504103	252	55	7	54.72	12.13
chr1	198819557	198819797	241	123	9	79.92	22.55
chr1	199211410	199211672	263	88	9	68.53	18.5
chr1	199241779	199242134	356	198	10	60.77	16.4
chr1	199345770	199345963	194	107	6	54.76	16.63
chr1	199648255	199648492	238	109	9	66.83	16.04
chr1	199862308	199862537	230	159	7	59.53	16.11
chr1	199870266	199871014	749	434	76	502.73	39.73
chr1	199878330	199878576	247	169	6	58.94	19.64
chr1	199887642	199887954	313	92	8	51.68	18.04
chr1	199985697	199986436	740	460	191	1278.33	31.02
chr1	200008629	200008907	279	130	8	51.58	13.75
chr1	200119867	200120334	468	209	15	73.09	15.86
chr1	200306355	200306742	388	168	26	184.1	25.77
chr1	200378828	200379215	388	240	10	53.67	10.74
chr1	200398296	200398769	474	220	67	524.69	52.58
chr1	200446700	200447350	651	478	69	461.91	39.57
chr1	200638550	200639062	513	187	12	61.03	9.37
chr1	200677817	200678114	298	125	8	63.46	13.75
chr1	200708099	200708636	538	453	19	117.05	18.33
chr1	200858017	200858596	580	293	29	130.81	16.04
chr1	200862621	200863060	440	261	19	74.67	9.47
chr1	200877610	200877892	283	134	12	74.87	12.03
chr1	200942609	200942833	225	88	9	64.13	12.13
chr1	201029047	201029353	307	130	10	56.93	14.73
chr1	201062908	201063121	214	66	7	54.86	18.41
chr1	201083536	201083929	394	207	13	71.12	11.25
chr1	201123254	201123561	308	215	9	67.71	15.16
chr1	201139526	201140625	1100	249	55	247.11	19.64
chr1	201244351	201244890	540	227	23	162.01	24.55
chr1	201276995	201277374	380	120	13	80.22	19.33
chr1	201317353	201317537	185	92	6	54.76	19.95
chr1	201322242	201322833	592	394	33	221.7	25.77
chr1	201430998	201431334	337	256	14	83.5	12.03
chr1	201451282	201451492	211	94	12	100.22	23.14
chr1	201458405	201458697	293	86	9	53.29	9.91
chr1	201464389	201464971	583	300	102	727.17	43.98
chr1	201485204	201485471	268	188	8	62.78	15.16
chr1	201662030	201662245	216	67	6	50.01	15.62
chr1	201665560	201665838	279	189	7	53.42	19.33
chr1	201683742	201684303	562	284	25	132.05	20
chr1	201924290	201924491	202	76	6	68.92	28.4
chr1	201977306	201977569	264	170	14	126.66	30.65
chr1	201987346	201988407	1062	359	154	734.88	16.94
chr1	201992119	201992501	383	292	23	54.93	6.47
chr1	202003869	202004281	413	92	27	213.08	24.26
chr1	202015265	202015700	436	272	35	236.88	20.88
chr1	202016099	202016682	584	148	22	88.5	10.18
chr1	202025894	202026658	765	331	83	441.59	24.68
chr1	202027269	202027848	580	206	40	147.77	12.45
chr1	202054952	202055498	547	205	22	110.87	12.5
chr1	202056096	202056498	403	126	23	140.25	15.97
chr1	202075418	202075957	540	214	82	328.59	16.39
chr1	202077221	202077769	549	302	127	485.51	14.86
chr1	202081974	202082471	498	149	149	887.29	26.81
chr1	202101315	202102173	859	512	59	299.99	31.56
chr1	202152461	202152864	404	269	20	134.96	26.73
chr1	202169277	202169661	385	297	16	94.22	15.73
chr1	202223436	202223723	288	209	10	94.56	32.99
chr1	202238814	202239094	281	170	11	77.58	17.55
chr1	202253277	202253536	260	77	7	57.69	17.18
chr1	202304379	202305004	626	222	82	595.41	33.38
chr1	202315768	202315920	153	76	6	66.04	19.95
chr1	202501280	202501648	369	145	57	517.74	46.52
chr1	202550715	202550935	221	78	7	56.19	13.93
chr1	202624896	202625233	338	162	8	59	17.18
chr1	202631956	202632267	312	154	8	59.54	16.11
chr1	202765306	202765585	280	198	7	51.42	12.13
chr1	202776099	202776398	300	160	9	53.87	12.37
chr1	202777476	202777690	215	129	9	58.97	11.83
chr1	202896291	202896514	224	130	8	59.21	16.04
chr1	202907517	202907675	159	79	6	58.65	15.86
chr1	202935887	202936180	294	154	11	83.05	20.62
chr1	202958052	202958209	158	79	6	61.21	17.18
chr1	202976618	202977036	419	218	12	82.22	14.73
chr1	202985246	202985472	227	84	6	54.23	11.45
chr1	202995600	202995795	196	71	9	78.26	20.12
chr1	203028462	203028933	472	227	55	412.36	35.12
chr1	203057980	203059437	1458	638	614	2681.28	25.97
chr1	203069566	203069859	294	93	9	57.8	13.45
chr1	203070946	203071311	366	211	12	74.22	15.35
chr1	203076903	203077096	194	120	6	50.58	14.32
chr1	203100906	203101302	397	124	58	423.72	29.46
chr1	203115011	203115265	255	111	8	50.38	10.11
chr1	203154041	203154462	422	214	14	95.39	23.79
chr1	203236687	203236910	224	84	8	52.23	13.12
chr1	203256369	203256616	248	95	7	50.93	13.22
chr1	203278359	203278537	179	89	7	51.46	14.73
chr1	203322754	203322929	176	88	8	71.35	22.29
chr1	203409768	203410052	285	204	7	64.69	18.74
chr1	203488637	203489018	382	199	15	92.44	15.56
chr1	203574629	203574775	147	73	11	129.59	23.63
chr1	203764511	203764814	304	95	8	50.2	14.39
chr1	203767460	203767738	279	196	8	52.35	11.72
chr1	203830470	203830818	349	158	8	57.87	17.18
chr1	203967736	203968112	377	207	9	66.02	21.33
chr1	204010685	204010920	236	164	9	68.95	16.78
chr1	204053346	204053583	238	152	9	63.5	14.73
chr1	204099230	204099772	543	252	46	279.24	26.85
chr1	204120960	204121089	130	65	6	57.21	11.25
chr1	204166105	204166289	185	92	7	50.22	14.15
chr1	204215307	204215591	285	194	10	67.36	17.55
chr1	204267044	204267300	257	178	9	56.12	15
chr1	204288736	204288987	252	95	9	66.37	14.39
chr1	204349630	204350002	373	148	33	212.82	22.79
chr1	204367686	204367906	221	144	9	76.48	16.28
chr1	204463014	204463497	484	257	28	163.79	23.68
chr1	204677718	204677870	153	76	6	55.56	14.39
chr1	204732598	204733286	689	387	219	1510.7	37.07
chr1	204776194	204776583	390	300	16	100.35	17.51
chr1	204872732	204873030	299	90	18	157.23	36.82
chr1	205028789	205029077	289	198	8	51.93	11.99
chr1	205125342	205125621	280	75	8	64.51	16.63
chr1	205180246	205180738	493	295	19	118.8	17.18
chr1	205180756	205180945	190	95	8	62.01	17.18
chr1	205276853	205277015	163	81	6	62.12	17.67
chr1	205383491	205383708	218	63	7	71.97	26.89
chr1	205410280	205410543	264	71	7	61.77	19.83
chr1	205454620	205454786	167	83	8	75.83	18.74
chr1	205474764	205475610	847	605	63	299.94	31.38
chr1	205533011	205533382	372	205	22	200.52	37.23
chr1	205600994	205601266	273	179	11	95.84	28.12
chr1	205638834	205639094	261	175	9	65.92	19.64
chr1	205644645	205645122	478	256	14	70.87	15.56
chr1	205718290	205718911	622	266	20	92.38	12.03
chr1	205718946	205719102	157	78	7	54.19	12.03
chr1	205883875	205884182	308	78	8	56.85	14.73
chr1	206589662	206589865	204	124	6	55.22	17.77
chr1	206674612	206674863	252	75	7	55.66	15.62
chr1	206698249	206698558	310	177	8	60.89	16.63
chr1	206713596	206714064	469	345	15	91.27	14.06
chr1	206785611	206785979	369	186	11	85.93	20.62
chr1	206862192	206862488	297	208	9	59.11	16.4
chr1	206881393	206881743	351	154	40	338.56	38.13
chr1	206970310	206970700	391	232	19	129.12	23.34
chr1	207016894	207017521	628	290	107	747.29	39.38
chr1	207068635	207069045	411	225	42	205.95	11.74
chr1	207071747	207072437	691	354	74	293.75	22.35
chr1	207076789	207077462	674	338	140	892.52	39.81
chr1	207082799	207083420	622	358	55	368.67	35.59
chr1	207165135	207165407	273	184	7	59.49	15.27
chr1	207198985	207199184	200	94	11	87.11	19.09
chr1	207256710	207257085	376	238	9	54.73	10.57
chr1	207301728	207301867	140	70	6	79.02	20.62
chr1	207311900	207312128	229	84	6	51.98	17.77
chr1	207320664	207320876	213	129	6	57.09	19.83
chr1	207331509	207331659	151	75	6	57.85	15.46
chr1	207414899	207415336	438	228	16	106.47	21.58
chr1	207489531	207489810	280	92	15	105.06	17.47
chr1	207490005	207490431	427	176	16	51.94	8.67
chr1	207494445	207495290	846	355	52	259.28	18.13
chr1	207588824	207589090	267	76	6	54.17	13.45
chr1	207668114	207668304	191	95	6	56.64	21.33
chr1	207688361	207688605	245	83	7	52.95	11.15
chr1	207832403	207832574	172	86	7	66.04	23.28
chr1	208006765	208007022	258	86	7	63.77	16.49
chr1	208649774	208650086	313	224	11	92.25	23.28
chr1	208650171	208650512	342	175	11	87.99	19.95
chr1	208769263	208769470	208	117	8	91.5	36.08
chr1	208841001	208841203	203	110	6	68.78	28.4
chr1	209583333	209583654	322	133	9	91.23	28.4
chr1	209719649	209720149	501	264	73	631.38	56.46
chr1	210540244	210540561	318	177	11	115.48	43.41
chr1	211432222	211432542	321	148	43	407.73	41.57
chr1	211501072	211501260	189	94	8	72.35	22.91
chr1	211688612	211688856	245	154	8	80.21	31.38
chr1	211694809	211695265	457	165	86	779.65	56.33
chr1	211715401	211715752	352	168	9	79.75	32.8
chr1	211776764	211777096	333	141	12	97.04	21.87
chr1	211816891	211817483	593	501	17	122.74	21.33
chr1	212640272	212640548	277	138	19	192.96	33.35
chr1	212659588	212659808	221	127	6	66.32	28.4
chr1	212731358	212731933	576	149	44	339.23	44.44
chr1	213369941	213370224	284	89	9	86.67	31.38
chr1	214223857	214224097	241	153	7	70.14	28.12
chr1	214390216	214390447	232	83	6	64.92	28.4
chr1	214500847	214501247	401	127	38	314.32	40.27
chr1	214851801	214852090	290	214	7	55.3	17.77
chr1	214873772	214874169	398	148	37	318.89	46.21
chr1	215256626	215256894	269	205	7	54.57	12.89
chr1	215355152	215355501	350	91	8	56.63	16.63
chr1	215598443	215598973	531	246	30	214.01	37.67
chr1	215740430	215740765	336	175	10	51.16	8.74
chr1	215756786	215757085	300	112	13	95.4	20.17
chr1	215811570	215811923	354	252	23	159.2	24.99
chr1	215880285	215880475	191	95	7	58.65	18.5
chr1	215915584	215915888	305	178	8	55.26	16.72
chr1	216020309	216020605	297	226	7	53.49	17.18
chr1	216396842	216397174	333	89	9	55.63	16.78
chr1	216951494	216951768	275	70	8	75.97	22.41
chr1	217247280	217247417	138	69	6	71.35	16.72
chr1	217277581	217277867	287	68	6	52.15	13.45
chr1	217553621	217553804	184	92	6	70.09	34.08
chr1	218126833	218127019	187	93	7	55.56	16.78
chr1	218293581	218293718	138	69	7	85.08	20.62
chr1	218337482	218337946	465	93	13	61.71	9.2
chr1	218633126	218633529	404	231	9	56.1	17.67
chr1	218654013	218654463	451	238	21	119.89	22.2
chr1	218790018	218790568	551	244	35	220.93	35.35
chr1	218847855	218848240	386	154	12	76	14.39
chr1	218879605	218879902	298	89	11	65.97	14.47
chr1	219035448	219035734	287	94	8	59.33	17.67
chr1	219195465	219195735	271	75	7	52.44	12.13
chr1	219378731	219378972	242	65	7	50.14	10.06
chr1	219388314	219388543	230	75	6	50	16.63
chr1	219834509	219834720	212	95	7	80.72	28.4
chr1	220219447	220219963	517	151	20	160.7	33.26
chr1	220408842	220409160	319	125	8	75.65	30.93
chr1	220863586	220863832	247	157	8	85.09	36.08
chr1	221080385	221080592	208	114	9	94.42	31.72
chr1	221227194	221227455	262	169	7	73.71	28.4
chr1	221843013	221843245	233	90	12	130.8	41.24
chr1	221888743	221888989	247	65	7	59.32	17.18
chr1	222013267	222013520	254	163	9	97.01	30.93
chr1	222060535	222060741	207	88	6	68.21	28.4
chr1	222638664	222638934	271	198	6	60.46	22.72
chr1	223089350	223089633	284	137	6	56.37	20.62
chr1	223192287	223192503	217	134	6	65.52	27.13
chr1	223385870	223386467	598	257	52	397.11	48.42
chr1	223842738	223843361	624	362	41	289.34	50.67
chr1	223853382	223853658	277	121	11	98.18	19.95
chr1	223871110	223871446	337	254	10	89.36	25.77
chr1	223888705	223888953	249	119	8	75.39	34.08
chr1	223894851	223895244	394	211	15	120.27	31.24
chr1	223899979	223900398	420	332	17	124.4	20.62
chr1	224044583	224044782	200	114	7	70.78	23.79
chr1	224392614	224392817	204	113	7	78.77	25.77
chr1	224921165	224921364	200	139	6	69.21	28.4
chr1	225091672	225092029	358	216	35	338.32	57.99
chr1	225111498	225111805	308	166	11	112.1	44.18
chr1	225117441	225117690	250	173	7	73.75	21.7
chr1	225638225	225638668	444	168	44	349.77	49.37
chr1	225841336	225841506	171	85	6	65.87	29.46
chr1	225872092	225872368	277	84	6	58.53	16.28
chr1	226063159	226063502	344	200	16	136.73	32.4
chr1	226069339	226069720	382	176	9	80.3	30.93
chr1	226187078	226187338	261	171	6	58.76	20.62
chr1	226249625	226250262	638	225	169	1289.78	64.5
chr1	226298457	226298660	204	116	6	68.63	28.4
chr1	226678730	226678947	218	49	6	66.71	22.72
chr1	227003034	227003216	183	91	10	122.78	51.55
chr1	227050513	227050646	134	67	6	92.29	29.46
chr1	227058286	227058567	282	91	7	65.03	23.43
chr1	227058571	227058843	273	196	6	56.11	19.64
chr1	227505976	227506143	168	84	8	94.24	29.46
chr1	227506445	227506678	234	150	6	53.37	15.27
chr1	227922972	227923144	173	86	7	73.06	28.87
chr1	228134115	228134413	299	93	8	68.47	19.83
chr1	228233513	228234038	526	281	15	100.1	18.19
chr1	228594818	228594972	155	77	6	73.06	24.74
chr1	228611210	228611397	188	94	6	68.76	32.56
chr1	228619582	228619760	179	89	6	59.74	23.79
chr1	228986954	228987264	311	225	8	80.15	34.08
chr1	229139471	229139641	171	85	10	122.6	38.18
chr1	229283699	229284273	575	353	96	780.89	52.99
chr1	229297379	229297732	354	193	20	88.49	13
chr1	229297939	229298404	466	223	47	290.34	23.22
chr1	229300969	229301522	554	294	32	137.06	20.81
chr1	229344298	229344572	275	74	7	67.35	24.55
chr1	229356906	229357674	769	438	47	296.74	20.62
chr1	229364909	229365137	229	58	6	61.1	19.64
chr1	229517717	229517985	269	117	28	293.2	49.2
chr1	229663543	229663783	241	52	6	59.64	24.55
chr1	230207143	230207433	291	192	21	185.92	32.69
chr1	230220368	230220723	356	174	22	183.71	38.95
chr1	230424918	230425177	260	193	6	61.64	28.4
chr1	230636122	230636762	641	314	57	434.93	43.08
chr1	230816449	230816757	309	129	9	78.27	23.79
chr1	230820060	230820326	267	150	8	67.39	20.62
chr1	230883928	230884208	281	177	10	70.78	14.06
chr1	230888226	230888538	313	79	8	51.68	10.31
chr1	230908280	230908582	303	190	15	135.34	33.35
chr1	230931354	230931580	227	87	6	65.54	28.4
chr1	231762313	231762548	236	158	9	98.04	34.36
chr1	231906466	231906996	531	278	36	308.37	45.55
chr1	232299279	232299600	322	169	9	79.83	21.48
chr1	232736158	232736694	537	281	30	222.13	37.49
chr1	233243370	233243907	538	248	34	255.57	41.63
chr1	233248701	233249093	393	126	25	221.55	46.39
chr1	233679112	233679557	446	180	14	126.39	42.17
chr1	233763198	233763451	254	74	6	62.31	28.4
chr1	234614387	234614510	124	62	6	106.2	29.46
chr1	234643735	234643949	215	87	6	67.11	17.04
chr1	234735610	234735787	178	89	8	90.54	37.49
chr1	234803729	234804394	666	395	101	740.35	51.55
chr1	234859836	234860330	495	251	21	86.18	11.45
chr1	234860418	234860986	569	307	55	375.59	39.38
chr1	235011236	235011649	414	310	21	119.67	17.42
chr1	235012036	235012507	472	283	35	244.85	31.38
chr1	235047604	235047885	282	194	15	138.14	35.35
chr1	235061872	235062159	288	111	8	71.24	20.62
chr1	235093121	235093507	387	182	15	104.6	21.58
chr1	235098801	235099658	858	310	131	797.99	43.81
chr1	235110777	235111030	254	58	7	58.43	13.75
chr1	235120691	235120862	172	86	6	56.64	21.33
chr1	235142427	235142764	338	161	20	206.03	47.86
chr1	236203434	236203580	147	73	6	83.68	34.08
chr1	236260522	236260752	231	140	7	62.55	17.77
chr1	236666558	236666866	309	87	9	92.93	39.76
chr1	237044203	237044479	277	134	7	54.39	23.43
chr1	237593377	237593673	297	95	7	69.6	28.4
chr1	237934309	237934595	287	84	6	53.39	18.74
chr1	241428367	241429088	722	319	37	239.11	28.64
chr1	241555472	241555769	298	94	9	94.42	39.76
chr1	241805673	241805933	261	166	12	98.42	17.6
chr1	241870202	241870532	331	169	9	88.22	27.13
chr1	241980493	241980789	297	63	8	76.48	24.55
chr1	242216311	242216553	243	154	7	76.2	28.4
chr1	242388960	242389376	417	163	13	99.02	19.95
chr1	244065470	244065722	253	162	7	74.86	28.4
chr1	244466302	244466573	272	190	7	62.07	20.62
chr1	244617875	244618069	195	93	6	64.38	23.43
chr1	244799300	244799517	218	168	6	66.71	22.72
chr1	245026465	245026774	310	76	9	84.9	32.8
chr1	245499568	245499925	358	157	25	231.49	38.66
chr1	245704011	245704284	274	199	7	72.24	28.4
chr1	245771402	245771650	249	71	6	62.88	22.72
chr1	246013396	246013523	128	64	6	112.32	34.08
chr1	246742454	246742732	279	184	6	59.63	17.04
chr1	247267442	247267932	491	379	75	655.41	56.34
chr10	180754	181083	330	200	7	53.49	19.09
chr10	384825	385170	346	202	49	463.05	51.55
chr10	481974	482551	578	330	145	1177.63	60.03
chr10	563258	563638	381	175	18	121.17	23.34
chr10	566460	566651	192	92	12	101.51	21.81
chr10	659278	659501	224	144	8	86.91	34.36
chr10	824922	825152	231	129	6	65.04	22.72
chr10	988241	988499	259	168	6	61.75	17.04
chr10	1094957	1095247	291	145	9	80.69	19.83
chr10	1310943	1311438	496	256	25	178.05	30.07
chr10	1639004	1639261	258	63	6	61.86	22.72
chr10	1676389	1676687	299	221	10	92.88	37.11
chr10	1708634	1708967	334	132	8	60.61	17.77
chr10	3332114	3332369	256	160	7	65.34	21.48
chr10	3510297	3510680	384	210	16	97.77	18.41
chr10	3510854	3511483	630	100	29	172.74	21.7
chr10	3734557	3734982	426	278	32	284.2	57.27
chr10	4170251	4170525	275	153	22	234.73	48.51
chr10	4321863	4322404	542	206	66	505.36	46.96
chr10	4456858	4457084	227	147	6	65.54	28.4
chr10	4567467	4567730	264	90	14	148.47	47.58
chr10	4703938	4704275	338	220	11	81.44	14.32
chr10	4750538	4750774	237	99	9	84.59	24.88
chr10	4764205	4764488	284	72	6	51.25	17.18
chr10	5530281	5530593	313	158	8	60.55	16.63
chr10	5530835	5531063	229	113	8	58.43	13.75
chr10	5535635	5536133	499	268	17	75.51	14.94
chr10	5538430	5538849	420	269	30	211.68	33.85
chr10	5545395	5545725	331	250	13	108.45	24.99
chr10	5593540	5594096	557	150	39	244.33	28.12
chr10	5701693	5702735	1043	724	403	2260.05	30.58
chr10	5727261	5727496	236	150	6	60.24	19.64
chr10	6195121	6195564	444	303	113	781.85	34.52
chr10	6196540	6197072	533	370	82	424.82	24.66
chr10	6321465	6321712	248	146	6	63	22.72
chr10	6338633	6339124	492	179	35	157.63	19.79
chr10	6339481	6340448	968	647	67	277.43	22.09
chr10	6356974	6357163	190	95	6	60.86	24.74
chr10	6443528	6443717	190	95	10	114.38	42.96
chr10	6746881	6747092	212	155	6	67.52	22.72
chr10	6799252	6799482	231	65	6	51.74	14.22
chr10	7530603	7530917	315	142	11	90.42	25.77
chr10	7742512	7742758	247	87	6	63.11	28.4
chr10	7928123	7928359	237	144	9	99.89	41.24
chr10	8092459	8092959	501	407	35	230.35	21.48
chr10	8170232	8170695	464	189	67	629.94	66.27
chr10	8601343	8601555	213	129	6	61.84	23.43
chr10	8767938	8768545	608	191	95	709.23	48.93
chr10	8794471	8794843	373	154	29	266.58	49.2
chr10	9229996	9230676	681	236	24	134.97	14.73
chr10	9279982	9280541	560	201	34	242.14	26.24
chr10	10838830	10839028	199	132	6	69.35	28.4
chr10	11225172	11225426	255	67	9	100.88	34.08
chr10	11847429	11847654	226	134	11	134.89	56.8
chr10	11917298	11917519	222	132	6	59.39	22.41
chr10	12148421	12148581	161	80	7	97.77	39.76
chr10	12180042	12180301	260	210	6	61.64	22.72
chr10	12192209	12192623	415	154	49	440.83	61.86
chr10	12237824	12237988	165	82	6	70.54	22.91
chr10	12465638	12465872	235	93	6	63.23	16.28
chr10	12647793	12648102	310	229	9	92.79	45.44
chr10	12762476	12762743	268	144	6	60.78	17.04
chr10	12914672	12914997	326	142	61	621.27	61.04
chr10	13082316	13082720	405	165	20	193.46	45.82
chr10	13368347	13368582	236	162	6	64.42	22.72
chr10	13628865	13629132	268	93	8	80.26	19.64
chr10	14116435	14116624	190	95	6	64.53	28.12
chr10	14614231	14614521	291	79	7	70.27	34.08
chr10	14790576	14790795	220	99	7	66.45	28.4
chr10	15095604	15095796	193	66	6	70.09	28.4
chr10	15352289	15352522	234	138	6	64.67	17.04
chr10	15503358	15503828	471	239	27	244.29	45.48
chr10	15752693	15752907	215	140	6	60.31	22.41
chr10	17105096	17105505	410	216	56	517.33	47.13
chr10	17243317	17243714	398	302	11	104.39	27.13
chr10	17271954	17272118	165	82	6	83.68	34.08
chr10	17281299	17281604	306	223	18	184.37	35.55
chr10	17377651	17377912	262	178	8	86.51	34.08
chr10	17487324	17488186	863	551	137	900.49	57.51
chr10	17504907	17505150	244	71	8	58.63	14.73
chr10	17507684	17508078	395	261	25	208.53	45.82
chr10	17658722	17658972	251	160	6	62.65	22.72
chr10	17696421	17696756	336	146	27	273.58	47.37
chr10	18429719	18429896	178	89	6	62.03	25.77
chr10	19466788	19467048	261	169	7	67.54	28.12
chr10	19940914	19941089	176	88	6	67.28	30.93
chr10	20193086	20193513	428	153	21	191.95	34.36
chr10	20325660	20325903	244	169	6	63.46	28.4
chr10	20911902	20912212	311	87	10	103.49	37.98
chr10	21254376	21254701	326	141	9	90.72	28.4
chr10	21372891	21373141	251	191	6	61.34	21.7
chr10	21919380	21919757	378	164	61	604.28	50.07
chr10	22028901	22029131	231	139	6	58.26	22.41
chr10	22605842	22606199	358	174	8	63.42	20.62
chr10	22614590	22614836	247	59	9	100.3	27.13
chr10	22921866	22922228	363	201	26	254.46	48.68
chr10	22971633	22971865	233	74	6	59.28	18.74
chr10	23015832	23016055	224	91	6	65.93	28.4
chr10	23133376	23133655	280	216	6	59.53	28.4
chr10	23340802	23341211	410	170	24	202.53	47.77
chr10	23384353	23384629	277	184	6	54.39	23.43
chr10	23728141	23728372	232	150	6	60.73	19.64
chr10	23926353	23926664	312	173	7	67.99	28.4
chr10	24157119	24157515	397	192	19	156.53	30.65
chr10	24207189	24207585	397	250	18	153.96	28.12
chr10	24269058	24269399	342	93	14	132.43	35.69
chr10	24316131	24316417	287	92	6	52.15	13.45
chr10	24387498	24387753	256	124	8	87.37	34.08
chr10	25013500	25013655	156	78	8	102.4	35.86
chr10	25346596	25346922	327	139	14	126.4	30.93
chr10	25463871	25464120	250	174	6	53.68	16.49
chr10	26504989	26505255	267	175	8	80.4	24.55
chr10	26986740	26986945	206	86	8	78.45	36.08
chr10	27528622	27528893	272	90	7	62.07	20.62
chr10	27793157	27793410	254	193	7	66.98	17.93
chr10	28545677	28546122	446	299	29	235.5	38.36
chr10	28552185	28552420	236	71	7	66.66	20.62
chr10	28785052	28785239	188	94	7	62.12	20.62
chr10	28785348	28785678	331	235	16	139.39	29.46
chr10	28791956	28792137	182	91	6	70.09	34.08
chr10	28949323	28949662	340	92	11	104.93	42.17
chr10	29214334	29214835	502	195	62	529.79	55.73
chr10	29228636	29229221	586	272	23	193.15	33.14
chr10	29391649	29391878	230	143	8	64.26	18.99
chr10	29393968	29394256	289	214	8	50.38	16.04
chr10	29710610	29710837	228	80	6	61.23	24.55
chr10	29919141	29919585	445	271	22	159.11	21.93
chr10	30101161	30101383	223	128	13	138.52	39.1
chr10	30109977	30110294	318	173	27	268.05	55.32
chr10	30505851	30506043	193	81	7	83.68	34.08
chr10	30722485	30723040	556	315	15	85.23	15.09
chr10	30783145	30783384	240	90	12	141.31	46.39
chr10	30971134	30971516	383	264	13	115.92	24.74
chr10	31320598	31320900	303	208	7	62.71	23.43
chr10	31522449	31522709	261	139	6	61.53	22.72
chr10	32047918	32048655	738	239	55	350.2	32.13
chr10	32384282	32384446	165	82	6	80.44	30.93
chr10	32394786	32395209	424	231	16	122.44	23.56
chr10	32428236	32428530	295	209	9	85.11	22.41
chr10	33009894	33010178	285	81	7	70.95	34.08
chr10	33247265	33247509	245	75	6	56.59	17.93
chr10	33298995	33299489	495	92	12	92.99	21.48
chr10	33454537	33454860	324	151	10	79.79	23.28
chr10	33476476	33476748	273	89	6	60.25	28.4
chr10	33545382	33545647	266	147	7	66.92	23.43
chr10	33553382	33553809	428	300	17	163.34	44.82
chr10	33624759	33625142	384	237	15	105.09	23.98
chr10	33873426	33873765	340	208	14	135.21	45.36
chr10	33904977	33905131	155	77	6	83.68	34.08
chr10	34153179	34153625	447	214	8	52.94	19.09
chr10	34716390	34716602	213	129	10	122.95	51.12
chr10	35784548	35784804	257	161	6	54.05	21.48
chr10	36653271	36653644	374	154	13	124.59	37.49
chr10	36823596	36823834	239	151	10	106.78	31.38
chr10	37014650	37014868	219	68	6	61.05	18.74
chr10	37048439	37048725	287	86	6	58.82	22.72
chr10	37157147	37157423	277	139	14	141.98	46.86
chr10	38881704	38881874	171	85	7	78.82	34.36
chr10	39138093	39138256	164	82	8	102.4	35.86
chr10	42365009	42365315	307	179	8	63.6	17.77
chr10	42383965	42384816	852	764	49	53.3	9.63
chr10	42384946	42385832	887	612	84	201.35	12.71
chr10	42387051	42387463	413	254	48	142.7	14.92
chr10	42392504	42392918	415	228	62	225.45	18
chr10	42396590	42397243	654	315	54	80.8	8.57
chr10	42399106	42399574	469	364	42	119.34	12.52
chr10	42529747	42530398	652	472	34	154.48	14.73
chr10	42531800	42532022	223	89	18	117.62	17.36
chr10	42596644	42597301	658	513	22	66.14	9.66
chr10	42599501	42600306	806	294	43	182.79	18.94
chr10	43133550	43133793	244	166	6	62.15	21.7
chr10	43477232	43477633	402	220	12	97.68	34.36
chr10	43521762	43522287	526	309	76	596.72	45.7
chr10	43533371	43533816	446	265	18	116.85	25.77
chr10	43540099	43540412	314	158	13	102.04	21.15
chr10	43546171	43546351	181	90	6	67.28	30.93
chr10	43555993	43556320	328	203	9	90.47	34.08
chr10	43577617	43577901	285	72	7	56.96	14.73
chr10	43606254	43606647	394	173	73	693.97	52.14
chr10	43691635	43691898	264	194	6	58.44	20.62
chr10	43702238	43702520	283	72	7	53.97	19.95
chr10	43838084	43838321	238	52	6	61.39	20.62
chr10	43859007	43859268	262	169	9	84.95	31.72
chr10	43915997	43916136	140	70	7	112.32	39.76
chr10	43951026	43951265	240	156	6	61.16	20.62
chr10	44092164	44092599	436	203	25	200.5	44.52
chr10	44668406	44669404	999	788	101	608.9	52.02
chr10	44732244	44732821	578	209	33	240.17	37.11
chr10	44754470	44754964	495	253	22	145.69	33.66
chr10	44962738	44962961	224	86	6	63.13	25.77
chr10	45137509	45137831	323	167	14	112.8	24.42
chr10	45248759	45249034	276	185	6	50.91	12.37
chr10	45323095	45323540	446	234	20	160.54	34.36
chr10	45939400	45939666	267	173	6	60.88	22.72
chr10	46090256	46090521	266	77	6	56.84	19.64
chr10	46967124	46967262	139	69	6	94.12	30.93
chr10	47023146	47023362	217	80	8	58.79	13.16
chr10	47081466	47081736	271	188	6	51.42	20.62
chr10	48328977	48329397	421	161	13	81.89	22.09
chr10	48332039	48332384	346	221	17	116.87	21
chr10	48337925	48338110	186	93	6	55.68	20.62
chr10	48644958	48645436	479	234	19	150.62	34.36
chr10	49495836	49496106	271	198	7	54.34	12.89
chr10	49514329	49514531	203	111	6	65.97	25.77
chr10	49716964	49717183	220	132	6	60.92	18.74
chr10	49754124	49754373	250	186	6	62.77	28.4
chr10	50021873	50022494	622	328	67	413.48	35.86
chr10	50022865	50023283	419	260	30	147.67	14.34
chr10	50479434	50479641	208	105	12	154.46	56.8
chr10	50627197	50627489	293	91	8	80.66	27.13
chr10	51531067	51531494	428	198	19	152.67	34.36
chr10	51547195	51547898	704	369	109	739.78	41.54
chr10	51795100	51795346	247	90	7	75.66	28.4
chr10	52120729	52121209	481	325	114	1014.63	72.58
chr10	52153011	52153264	254	178	6	51.08	15.27
chr10	52298148	52298266	119	59	7	142.61	39.76
chr10	52312537	52312735	199	88	6	65.13	24.55
chr10	52709721	52709987	267	81	6	50.75	15.86
chr10	53657446	53657672	227	153	7	78.45	34.08
chr10	56836225	56836495	271	72	6	60.46	22.72
chr10	57738867	57739105	239	63	6	64.06	22.72
chr10	58933781	58933997	217	85	7	79.95	34.08
chr10	59802415	59802637	223	79	6	66.06	28.4
chr10	59949268	59949459	192	60	6	65.87	24.55
chr10	60228259	60228553	295	207	7	63.57	18.74
chr10	61082815	61083221	407	309	25	235.16	42.45
chr10	61548734	61548990	257	109	17	184.11	49.77
chr10	61666549	61666805	257	184	7	60.25	22.09
chr10	61791329	61791623	295	164	10	99.24	28.12
chr10	61946492	61946741	250	166	6	61.45	27.13
chr10	62013295	62013561	267	210	6	55.42	23.43
chr10	62042604	62042870	267	201	8	85.8	39.76
chr10	62480555	62480783	229	94	7	73.34	29.46
chr10	62493057	62493315	259	143	9	92.27	32.8
chr10	62607924	62609000	1077	689	235	1335.88	41.4
chr10	63031211	63031592	382	148	14	107.66	35.55
chr10	63158485	63158887	403	150	11	92.41	25.77
chr10	63169638	63170093	456	146	34	299.54	54.98
chr10	63428102	63428293	192	86	6	70.09	28.4
chr10	64076233	64076425	193	66	6	67.28	25.77
chr10	64214884	64215072	189	94	7	82.15	37.98
chr10	64564744	64564906	163	81	6	83.68	34.08
chr10	65098947	65099140	194	115	6	70.09	28.4
chr10	65237903	65238195	293	163	11	102.18	34.36
chr10	65390271	65390698	428	243	32	249.91	36.96
chr10	65406465	65406599	135	67	6	97.77	34.08
chr10	65471872	65472394	523	317	13	113.81	27.13
chr10	68386038	68386288	251	172	12	124.67	31.72
chr10	68862712	68862942	231	126	17	178	38.29
chr10	68874771	68875093	323	131	8	64.34	19.09
chr10	69579577	69579845	269	88	6	50.54	15.86
chr10	69611925	69612183	259	74	10	88.27	25.77
chr10	69644211	69644494	284	191	6	54.99	19.64
chr10	69968175	69968604	430	230	54	504.54	65.46
chr10	70748825	70749098	274	221	7	60.58	19.83
chr10	71078955	71079472	518	337	78	624.21	51.04
chr10	71101821	71102208	388	258	11	88.57	22.91
chr10	71120523	71120842	320	84	13	98.2	20.12
chr10	71198989	71199482	494	295	99	864.22	65.01
chr10	71219203	71219415	213	85	6	67.38	28.4
chr10	71841114	71841647	534	244	50	417.64	60.14
chr10	73068639	73069025	387	305	20	188.28	37.8
chr10	73093972	73094174	203	82	10	92.67	22.29
chr10	73099729	73100111	383	270	29	233.82	27.61
chr10	73149963	73150123	161	80	6	83.68	34.08
chr10	73195644	73195993	350	198	9	68.94	14.22
chr10	73272549	73272953	405	230	10	81.23	21.48
chr10	73526608	73526818	211	127	7	70.31	20.62
chr10	73627971	73628405	435	233	25	205.64	31.91
chr10	73828572	73829038	467	234	13	109.4	26.89
chr10	74057636	74057866	231	91	7	77.87	28.4
chr10	74070091	74070320	230	65	8	91.37	28.4
chr10	74085149	74085669	521	159	15	104.48	19.33
chr10	74091211	74091683	473	230	13	82.44	25.08
chr10	74862374	74862636	263	167	13	130.99	36.82
chr10	74950257	74950526	270	204	7	71.22	32.56
chr10	75573227	75573475	249	156	7	66.24	21.48
chr10	75579361	75579732	372	107	16	125.74	24.42
chr10	75647554	75647736	183	91	8	90.54	37.49
chr10	75911366	75911740	375	204	14	118.06	20.62
chr10	76503031	76503294	264	76	6	52.15	16.49
chr10	76586377	76586809	433	308	74	614.39	48.17
chr10	76970749	76971042	294	73	7	58.33	15.86
chr10	77005233	77005489	257	183	6	56.5	18.74
chr10	77160924	77161184	261	176	8	60.72	16.72
chr10	77875178	77875402	225	93	12	132.69	41.24
chr10	78386110	78386601	492	259	49	406	50.75
chr10	78401809	78402505	697	242	88	652.5	57.39
chr10	78790048	78790323	276	186	6	54.49	18.74
chr10	78923826	78924185	360	194	10	86.42	30.07
chr10	79047499	79047873	375	213	24	222.14	39.01
chr10	79130527	79130701	175	87	9	95.74	34.36
chr10	79169812	79170170	359	266	22	196.33	31.72
chr10	79191046	79191325	280	92	6	56.77	15.46
chr10	79239798	79240227	430	282	26	211.06	25.2
chr10	79342339	79342813	475	200	36	282.78	32.56
chr10	79474398	79474684	287	194	7	63.03	22.41
chr10	79619766	79619945	180	90	7	78.82	34.36
chr10	79625421	79625672	252	91	7	56.63	16.11
chr10	79631972	79632369	398	232	42	340.95	33.89
chr10	79649081	79649565	485	233	23	176.93	38.66
chr10	79666736	79666994	259	69	7	64.97	17.18
chr10	79686551	79686697	147	73	7	87.49	21.87
chr10	79732005	79732295	291	151	28	295.22	51.55
chr10	79945342	79945859	518	250	58	483.42	55.18
chr10	80016047	80016325	279	120	27	255.67	39.65
chr10	80159829	80160105	277	81	7	50.81	16.49
chr10	80216905	80217171	267	177	7	61.41	23.79
chr10	80274639	80275069	431	229	37	326.5	40.43
chr10	80514118	80514465	348	204	45	423.95	39.65
chr10	80585783	80586088	306	211	10	60.93	16.17
chr10	80586160	80586592	433	230	30	227.94	29.74
chr10	80651953	80652309	357	183	58	544.71	43.81
chr10	80671505	80671936	432	292	16	136.41	25.77
chr10	80679987	80680213	227	133	7	67.92	20.62
chr10	80724923	80725142	220	147	6	59.65	17.93
chr10	80737493	80737933	441	162	22	152.51	22.24
chr10	80806615	80806831	217	84	8	80.17	27.76
chr10	80828491	80828733	243	80	7	53.2	11.15
chr10	80888296	80888795	500	220	115	935.28	49.43
chr10	80909762	80910142	381	188	12	106.67	34.36
chr10	80918185	80918913	729	239	135	792.74	38.72
chr10	80922599	80922995	397	174	22	58.41	7.57
chr10	80952265	80952424	160	80	6	83.68	34.08
chr10	81024594	81024939	346	124	9	59.9	13.93
chr10	81040348	81040487	140	70	6	97.77	34.08
chr10	81101928	81102220	293	200	11	75.63	19.74
chr10	81102421	81102727	307	216	12	74.45	22.41
chr10	81103021	81103346	326	160	11	67.84	12.37
chr10	81109524	81109689	166	83	7	90.54	32.8
chr10	81115529	81115662	134	67	6	61.28	12.62
chr10	81118470	81118891	422	204	28	226.64	48.39
chr10	81299528	81299680	153	76	6	83.68	34.08
chr10	81742135	81742384	250	89	8	67.43	16.11
chr10	81923464	81923657	194	98	6	70.09	28.4
chr10	82173521	82173767	247	111	6	61.8	16.28
chr10	82189257	82189570	314	178	7	56.28	28.4
chr10	82295836	82296128	293	210	10	106.21	43.41
chr10	82369458	82369684	227	66	6	65.54	28.4
chr10	82726252	82726839	588	334	50	384.39	48.32
chr10	83658251	83658486	236	144	6	51.14	17.77
chr10	85899414	85899664	251	174	8	86.4	27.13
chr10	86087888	86088159	272	125	6	60.35	22.72
chr10	86441045	86441317	273	51	8	73.19	20.62
chr10	86768313	86768569	257	161	10	103.48	31.38
chr10	87079031	87079219	189	94	7	83.68	39.76
chr10	87381225	87381390	166	83	8	98.93	32.99
chr10	88121256	88121463	208	76	6	54.67	17.77
chr10	88475545	88475781	237	151	8	73.82	36.08
chr10	88718900	88719151	252	173	9	82.09	21.33
chr10	88727387	88727519	133	66	6	81.57	22.09
chr10	88728047	88728359	313	92	10	85.79	29.46
chr10	88768052	88768432	381	287	25	259.41	67.54
chr10	88855321	88855471	151	75	6	68.2	21.33
chr10	89264568	89264752	185	92	7	77.28	32.8
chr10	89379473	89379666	194	55	6	62.03	21.48
chr10	89417130	89417549	420	178	57	492.38	58.33
chr10	89623213	89623417	205	113	7	65.31	20.62
chr10	90145260	90145729	470	251	57	478.27	55.62
chr10	91334942	91335392	451	305	21	168.51	30.65
chr10	91752555	91752813	259	170	6	55.03	17.93
chr10	92472881	92473159	279	117	11	112.49	31.38
chr10	92680900	92681192	293	94	12	112.42	29.46
chr10	92688164	92688419	256	164	9	77.48	22.55
chr10	93120790	93121087	298	82	7	69.49	28.4
chr10	93548354	93548617	264	178	9	91.48	28.12
chr10	94050698	94051170	473	221	11	72.71	16.63
chr10	95038547	95038663	117	58	7	140.29	37.98
chr10	95163833	95164029	197	101	9	98.3	32.99
chr10	95194666	95195230	565	291	25	171.3	22.91
chr10	95241886	95242146	261	92	7	64.72	25.77
chr10	95330738	95331270	533	225	60	471.08	47.68
chr10	95462302	95462585	284	86	7	59.12	28.4
chr10	95493225	95493503	279	58	6	59.63	22.72
chr10	95700894	95701091	198	80	7	83	34.08
chr10	95776701	95777120	420	177	60	524.16	41.49
chr10	96163049	96163243	195	101	7	60.71	24.74
chr10	96304912	96305175	264	76	6	51.06	15.86
chr10	97259218	97259680	463	250	15	109.98	28.12
chr10	97476538	97476843	306	153	10	101.9	30.93
chr10	97667584	97667757	174	87	7	77.28	32.8
chr10	97849423	97849705	283	101	8	83.64	34.08
chr10	97956275	97956576	302	85	9	87.87	29.46
chr10	98215119	98215384	266	179	7	73.21	22.72
chr10	98238863	98239279	417	199	45	381.23	42.45
chr10	98273453	98273687	235	149	7	66.79	24.74
chr10	98356413	98356709	297	84	8	73.16	22.41
chr10	98602867	98603197	331	96	25	254.28	53.02
chr10	99097147	99097374	228	155	6	53.08	18.41
chr10	99113761	99113978	218	133	11	136.71	51.12
chr10	99168247	99168628	382	270	18	161.78	43.23
chr10	99258290	99258540	251	158	6	62.65	28.4
chr10	99331379	99331746	368	228	24	201.82	40.34
chr10	99393127	99393412	286	95	8	77.87	24.55
chr10	99408817	99409090	274	89	9	96	27.13
chr10	99765242	99765443	202	113	6	66.11	25.77
chr10	99967917	99968227	311	80	8	80.15	39.76
chr10	100029018	100029581	564	182	44	356.06	42
chr10	100055781	100055972	192	83	9	110.4	43.41
chr10	100074043	100074770	728	265	160	1155.6	47.95
chr10	100155807	100156314	508	269	36	295.36	50.49
chr10	101132104	101132317	214	145	6	65.92	21.7
chr10	101154747	101155009	263	185	6	53.4	12.89
chr10	101407622	101407878	257	164	6	59.2	25.77
chr10	101412705	101413091	387	269	12	101.64	31.72
chr10	101605595	101605863	269	193	6	60.67	28.4
chr10	101780083	101780350	268	95	6	60.78	17.04
chr10	102372960	102373232	273	186	6	60.25	22.72
chr10	102749398	102749676	279	90	16	155.38	24.99
chr10	102758165	102758663	499	264	19	126.4	31.17
chr10	102820689	102821045	357	186	14	102.29	15.09
chr10	102852753	102853082	330	92	11	82.57	22.91
chr10	102884230	102884578	349	142	28	282.68	50.15
chr10	102950658	102950980	323	131	8	78.76	28.4
chr10	103322892	103323130	239	85	7	70.41	28.12
chr10	103361311	103361477	167	83	7	96.05	37.98
chr10	103391665	103391967	303	127	7	62.71	23.43
chr10	103578524	103578694	171	85	6	68.76	32.56
chr10	103591343	103591766	424	241	27	197.65	23.51
chr10	103698167	103698561	395	220	18	161.73	44.67
chr10	103880045	103880619	575	267	68	464.21	46.25
chr10	103893239	103893531	293	179	9	73.35	16.63
chr10	103948610	103948793	184	92	6	70.09	34.08
chr10	103995314	103995497	184	92	7	71.77	27.76
chr10	104168095	104168381	287	78	6	56.07	20.62
chr10	104210401	104210690	290	75	7	60.02	24.74
chr10	104263592	104263870	279	77	6	50.61	16.49
chr10	104405693	104405938	246	92	10	76.52	16.4
chr10	104438533	104438818	286	85	6	56.17	20.62
chr10	104470352	104470812	461	256	59	504.24	42.84
chr10	104512982	104513357	376	168	10	54.11	10.52
chr10	104517256	104517640	385	161	25	190.86	39.97
chr10	104534078	104534471	394	226	47	419.81	56.93
chr10	104559815	104560391	577	351	38	283.78	34.36
chr10	104573874	104574266	393	225	24	199.66	30.46
chr10	104838187	104838422	236	68	6	52.12	14.73
chr10	104915714	104915961	248	159	8	81.41	28.12
chr10	104928147	104928620	474	183	45	344.12	35.31
chr10	105001377	105001751	375	166	9	79.07	24.55
chr10	105492754	105492912	159	79	6	80.44	30.93
chr10	105553909	105554356	448	264	18	135.97	25.08
chr10	105593486	105593745	260	87	10	101.02	30.07
chr10	105649996	105650393	398	127	22	208.27	43.23
chr10	105677808	105677972	165	82	6	68.2	21.33
chr10	106051110	106051441	332	200	8	76.07	32.56
chr10	106240615	106241041	427	165	20	171.64	40.61
chr10	108775342	108775573	232	154	7	71.39	28.12
chr10	108854944	108855257	314	168	20	195.54	51.55
chr10	110481720	110482003	284	207	6	59.12	17.04
chr10	110778477	110778747	271	175	6	60.46	17.04
chr10	111668192	111668384	193	98	10	116.34	40.34
chr10	112168027	112168309	283	143	7	63.48	17.93
chr10	112190626	112190976	351	110	12	95.9	28.99
chr10	112257283	112257665	383	86	19	176.54	34.36
chr10	112499552	112499842	291	140	10	79.18	20.62
chr10	112499879	112500231	353	159	9	62.39	15.16
chr10	112501652	112501900	249	93	10	81.27	23.79
chr10	112534793	112535004	212	95	7	79.2	27.13
chr10	112541035	112541301	267	137	12	119.32	34.36
chr10	112549380	112550069	690	404	35	251.67	41.24
chr10	112582274	112582758	485	298	102	859.89	55.26
chr10	112867458	112868014	557	348	57	450.97	50.11
chr10	113150291	113150622	332	149	40	412.03	49.48
chr10	113622862	113623132	271	186	6	60.46	22.72
chr10	113813633	113814255	623	328	192	1474.89	52.51
chr10	113943343	113943755	413	191	7	54.33	24.55
chr10	114052331	114052542	212	81	7	75.89	29.46
chr10	114323254	114323480	227	75	8	83.04	26.89
chr10	114564202	114564482	281	219	6	53.98	14.06
chr10	115438076	115439097	1022	646	453	2645.42	26.63
chr10	115510993	115511415	423	146	19	158.24	36.39
chr10	115718360	115718597	238	123	13	89.12	15.86
chr10	115719216	115719662	447	182	24	146.74	15.62
chr10	115738071	115738210	140	70	6	82.92	22.91
chr10	115742495	115742667	173	86	6	59.74	23.79
chr10	115816692	115817238	547	298	71	555.35	51.55
chr10	115938718	115938892	175	87	7	75.81	31.38
chr10	115998991	115999476	486	188	40	314.3	38.87
chr10	116139068	116139295	228	143	8	78.35	27.76
chr10	116267200	116267470	271	139	7	63.5	21.48
chr10	116311179	116311436	258	88	6	61.86	22.72
chr10	116371506	116371751	246	79	6	63.23	28.4
chr10	116395266	116395446	181	90	6	57.63	22.09
chr10	116414530	116414813	284	79	6	51.25	12.89
chr10	116583111	116583401	291	212	7	55.19	14.22
chr10	117424071	117424818	748	349	181	1290.33	51.28
chr10	117840039	117840427	389	269	25	240.01	45.48
chr10	117902917	117903363	447	139	32	243.77	39.1
chr10	118369097	118369346	250	89	12	136.44	49.09
chr10	119133819	119134107	289	203	6	58.63	28.4
chr10	119368616	119368898	283	204	6	57.92	21.7
chr10	119444491	119444831	341	168	11	100.52	30.07
chr10	119496132	119496624	493	308	22	157.88	21.58
chr10	119643696	119643935	240	72	7	75.09	32.56
chr10	119806400	119806638	239	151	8	62.58	18.41
chr10	119876380	119876761	382	153	26	231.65	39.27
chr10	119942676	119943049	374	235	21	210.45	33.14
chr10	120385067	120385376	310	141	35	350.77	48.51
chr10	120514633	120514919	287	217	6	54.7	19.64
chr10	120564661	120564830	170	85	6	67.28	30.93
chr10	120840726	120841000	275	169	7	55.91	17.18
chr10	120852391	120852597	207	121	6	68.21	28.4
chr10	120916235	120916542	308	92	8	80.51	28.4
chr10	121077019	121077309	291	144	12	104.09	24.99
chr10	121146044	121146296	253	59	6	62.42	22.72
chr10	121228892	121229083	192	110	6	70.09	28.4
chr10	121283226	121283385	160	80	7	70.39	18.99
chr10	121285710	121286064	355	122	14	104.09	28.35
chr10	121302306	121302586	281	84	8	70.71	23.79
chr10	121427576	121427790	215	133	6	59.09	17.18
chr10	121485375	121485665	291	91	7	61.21	25.77
chr10	122012792	122013090	299	186	7	53.55	19.64
chr10	122198030	122198281	252	191	6	62.54	22.72
chr10	122709636	122709947	312	115	55	571.22	53.79
chr10	122756232	122756429	198	87	16	212	68.73
chr10	123002747	123003018	272	176	11	97.52	25.77
chr10	123005449	123005700	252	62	9	80.72	17.18
chr10	123485400	123485610	211	94	7	77.66	30.93
chr10	123802316	123802535	220	125	6	63.65	25.77
chr10	123906452	123906785	334	182	16	151.83	31.99
chr10	123946818	123947065	248	55	6	61.68	27.13
chr10	124916182	124916443	262	180	8	66.89	19.95
chr10	125318235	125318471	237	147	7	77.02	34.08
chr10	125396293	125396635	343	196	14	109.97	33.26
chr10	125481451	125481837	387	112	28	237.25	42.17
chr10	125503446	125503825	380	202	20	179.07	39.42
chr10	125795442	125795743	302	107	19	174.51	31.72
chr10	125816158	125816578	421	289	41	350.33	37.18
chr10	125853007	125853340	334	178	68	662.22	52.11
chr10	125969606	125969846	241	154	6	63.82	17.04
chr10	125996972	125997306	335	154	17	159.38	36.58
chr10	126028531	126028864	334	244	20	192.77	43.74
chr10	126074475	126075213	739	414	194	1332.27	49.47
chr10	126183943	126184161	219	142	6	66.58	28.4
chr10	126441988	126442221	234	64	6	64.67	28.4
chr10	126711989	126712169	181	90	10	95.93	28.64
chr10	126723751	126724065	315	118	7	67.68	28.4
chr10	126812359	126812656	298	230	11	101.35	26.73
chr10	126849331	126849559	229	69	7	61.74	17.18
chr10	127227524	127227789	266	185	6	51.94	16.49
chr10	127273446	127273822	377	198	12	93.84	23.28
chr10	127274054	127274286	233	137	9	81.28	16.11
chr10	127313217	127313831	615	331	178	1340.83	49.33
chr10	127379247	127379529	283	199	9	83.41	32.99
chr10	127585144	127585368	225	130	6	56.64	20.62
chr10	127585416	127585642	227	79	6	56.39	20.62
chr10	127603411	127603639	229	159	6	65.29	28.4
chr10	127616893	127617243	351	162	18	188.47	47.25
chr10	127748820	127749039	220	127	14	106.94	24.26
chr10	127750887	127751312	426	243	15	89.34	12.37
chr10	127777876	127778132	257	85	6	55.24	22.41
chr10	127802385	127802682	298	211	7	69.49	28.4
chr10	127864389	127864883	495	266	16	129.57	30.55
chr10	128185236	128185529	294	175	8	67.71	19.09
chr10	128197334	128197568	235	142	12	90.56	19.45
chr10	128197656	128197968	313	157	27	240.24	35.01
chr10	128232191	128232727	537	294	91	764.98	55.59
chr10	128241070	128241226	157	78	6	83.68	34.08
chr10	128331215	128331432	218	123	9	105.51	43.41
chr10	128514630	128514903	274	83	6	51.12	16.49
chr10	128606873	128607183	311	146	13	125.59	35.69
chr10	128812381	128812665	285	231	6	54.89	19.64
chr10	129045256	129045524	269	72	7	69.66	25.77
chr10	129127173	129127846	674	339	286	2163.88	50.17
chr10	129368267	129368507	241	72	6	58.32	18.74
chr10	129573160	129573366	207	112	6	60.17	21.48
chr10	129706951	129707346	396	180	12	89.67	25.77
chr10	129720024	129720210	187	93	7	53.44	15.69
chr10	129721335	129721682	348	218	24	199.03	30.93
chr10	129823881	129824116	236	160	7	75.65	32.56
[truncated: 15,044 more rows]
