# Supplementary material for: Identification and Analysis of Estrogen Receptor α Promoting Tamoxifen Resistance-Related lncRNAs
Source: Biomed Res Int. 2020 Apr 28;2020:9031723. doi: 10.1155/2020/9031723 (PMC7204353; doi:10.1155/2020/9031723)
Supplement: Supplementary 2 — Table S2: differentially expressed protein-coding genes and lncRNAs. [file 9031723.f2.xlsx]

## Sheet: Protein-coding_p<=0.05 FC>=2
Gene ID	baseMean	log2FoldChange	lfcSE	stat	pvalue	padj
ENSG00000111716	5897.87	14.5745	1.42378	10.2365	1.36e-24	1.38e-23
ENSG00000081189	662.934	12.8634	1.44703	8.88949	6.14e-19	4.98e-18
ENSG00000169429	473.432	12.3762	1.44901	8.54115	1.33e-17	1.01e-16
ENSG00000176887	368.206	12.0149	1.45001	8.28603	1.17e-16	8.43e-16
ENSG00000112319	326.486	11.8405	1.45105	8.15996	3.35e-16	2.36e-15
ENSG00000254087	308.48	11.7586	1.45153	8.10082	5.46e-16	3.79e-15
ENSG00000181449	215.586	11.2423	1.45478	7.72785	1.09e-14	7.09e-14
ENSG00000127324	213.759	11.2296	1.45497	7.71814	1.18e-14	7.64e-14
ENSG00000149948	192.638	11.0807	1.45618	7.60944	2.75e-14	1.75e-13
ENSG00000185008	158.587	10.8005	1.45903	7.40249	1.34e-13	8.18e-13
ENSG00000008311	3247.75	10.7141	0.513923	20.8476	1.6e-96	7.3e-95
ENSG00000163297	137.85	10.6002	1.46302	7.24543	4.31e-13	2.56e-12
ENSG00000125845	134.931	10.5672	1.46168	7.22947	4.85e-13	2.87e-12
ENSG00000146858	131.892	10.5343	1.4621	7.20493	5.81e-13	3.42e-12
ENSG00000233280	129.913	10.5128	1.46249	7.18833	6.56e-13	3.85e-12
ENSG00000133687	343.727	10.4728	1.43052	7.32095	2.46e-13	1.48e-12
ENSG00000173093	125.85	10.465	1.46313	7.15253	8.52e-13	4.97e-12
ENSG00000104267	120.565	10.4038	1.46379	7.10745	1.18e-12	6.85e-12
ENSG00000174607	106.224	10.2203	1.46679	6.96783	3.22e-12	1.81e-11
ENSG00000198121	86.0889	9.91865	1.47195	6.73845	1.6e-11	8.59e-11
ENSG00000170954	84.6204	9.89252	1.47258	6.71782	1.84e-11	9.84e-11
ENSG00000164749	81.6883	9.84544	1.47533	6.6734	2.5e-11	1.32e-10
ENSG00000118596	76.2799	9.74518	1.476	6.60241	4.05e-11	2.11e-10
ENSG00000123342	73.2514	9.68335	1.47766	6.55315	5.63e-11	2.91e-10
ENSG00000213684	72.4663	9.66851	1.47756	6.54357	6.01e-11	3.09e-10
ENSG00000071967	778.572	9.65199	0.72891	13.2417	5.04e-40	8.42e-39
ENSG00000112902	69.1678	9.60409	1.47936	6.49204	8.47e-11	4.32e-10
ENSG00000188641	67.2486	9.56172	1.47987	6.46117	1.04e-10	5.26e-10
ENSG00000140563	65.4953	9.52429	1.48088	6.4315	1.26e-10	6.36e-10
ENSG00000182568	1193.68	9.46213	0.552356	17.1305	8.79e-66	2.53e-64
ENSG00000182263	170.036	9.45765	1.43849	6.57471	4.87e-11	2.53e-10
ENSG00000165300	62.1546	9.45251	1.48709	6.3564	2.07e-10	1.02e-09
ENSG00000197044	61.3474	9.42773	1.48393	6.35322	2.11e-10	1.04e-09
ENSG00000137727	160.631	9.37311	1.43885	6.51431	7.3e-11	3.74e-10
ENSG00000004799	55.3446	9.28133	1.48769	6.23875	4.41e-10	2.13e-09
ENSG00000249853	54.9608	9.27084	1.48796	6.23059	4.65e-10	2.24e-09
ENSG00000079819	1153.71	9.21972	0.517771	17.8066	6.28e-71	1.97e-69
ENSG00000198185	139.993	9.17612	1.44124	6.36681	1.93e-10	9.59e-10
ENSG00000177707	48.958	9.10658	1.49479	6.09222	1.11e-09	5.24e-09
ENSG00000116701	885.807	9.02918	0.554829	16.2738	1.51e-59	3.93e-58
ENSG00000184304	1124.47	9.01183	0.489274	18.4188	9.29e-76	3.16e-74
ENSG00000205426	14025.2	8.97841	0.319008	28.1448	2.77e-174	2.75e-172
ENSG00000136542	43.6412	8.93869	1.49945	5.96132	2.5e-09	1.15e-08
ENSG00000175556	112.807	8.86218	1.44533	6.13161	8.7e-10	4.12e-09
ENSG00000188321	40.9197	8.84668	1.50349	5.88412	4e-09	1.81e-08
ENSG00000167981	110.504	8.83101	1.44647	6.10523	1.03e-09	4.84e-09
ENSG00000187527	40.3279	8.82236	1.50459	5.86362	4.53e-09	2.04e-08
ENSG00000167383	436.473	8.81671	0.733795	12.0152	2.96e-33	4.04e-32
ENSG00000175745	429.667	8.7946	0.734254	11.9776	4.66e-33	6.31e-32
ENSG00000183098	606.153	8.70567	0.600536	14.4965	1.27e-47	2.58e-46
ENSG00000169855	1209.69	8.70225	0.425928	20.4313	8.82e-93	3.81e-91
ENSG00000057019	592.823	8.67335	0.600679	14.4392	2.93e-47	5.86e-46
ENSG00000117114	279.843	8.58923	0.849021	10.1166	4.66e-24	4.65e-23
ENSG00000134138	180.426	8.54161	1.04021	8.21145	2.19e-16	1.55e-15
ENSG00000146233	32.5644	8.51422	1.51855	5.6068	2.06e-08	8.78e-08
ENSG00000144063	84.6335	8.44716	1.45251	5.81556	6.04e-09	2.69e-08
ENSG00000198155	83.7719	8.43389	1.45316	5.80381	6.48e-09	2.88e-08
ENSG00000196104	28.4908	8.32122	1.52915	5.44173	5.28e-08	2.17e-07
ENSG00000170786	71.7763	8.21045	1.45809	5.63098	1.79e-08	7.69e-08
ENSG00000120162	71.4172	8.20349	1.45826	5.62552	1.85e-08	7.93e-08
ENSG00000080200	142.267	8.19917	1.04607	7.83804	4.58e-15	3.02e-14
ENSG00000153292	139.132	8.16321	1.04706	7.79629	6.38e-15	4.18e-14
ENSG00000136155	25.3185	8.15163	1.53922	5.29595	1.18e-07	4.74e-07
ENSG00000114248	67.5689	8.12346	1.46024	5.56312	2.65e-08	1.12e-07
ENSG00000165474	801.456	8.10674	0.429289	18.8841	1.54e-79	5.56e-78
ENSG00000144278	24.0654	8.08424	1.54894	5.21922	1.8e-07	7.09e-07
ENSG00000105852	23.0229	8.01445	1.54854	5.17549	2.27e-07	8.89e-07
ENSG00000182795	373.735	8.00755	0.607816	13.1743	1.23e-39	2.04e-38
ENSG00000124491	22.5796	7.99228	1.55533	5.13864	2.77e-07	1.07e-06
ENSG00000153291	61.6031	7.98504	1.46384	5.45485	4.9e-08	2.03e-07
ENSG00000175294	22.4137	7.97439	1.55224	5.13734	2.79e-07	1.08e-06
ENSG00000105880	22.0794	7.95566	1.55276	5.12357	3e-07	1.16e-06
ENSG00000047457	1126.63	7.93224	0.34332	23.1045	4.17e-118	2.46e-116
ENSG00000162009	57.3537	7.88278	1.4662	5.37632	7.6e-08	3.09e-07
ENSG00000161298	20.97	7.87521	1.56486	5.03255	4.84e-07	1.84e-06
ENSG00000116016	3412.36	7.87334	0.196654	40.0366	0	0
ENSG00000125285	20.2097	7.82643	1.56273	5.00816	5.5e-07	2.08e-06
ENSG00000155130	2606.56	7.80633	0.218655	35.7017	3.72e-279	8.26e-277
ENSG00000186777	54.3151	7.80375	1.46858	5.31382	1.07e-07	4.32e-07
ENSG00000178573	217.134	7.80331	0.745354	10.4693	1.2e-25	1.27e-24
ENSG00000060709	19.2241	7.75907	1.57125	4.93817	7.89e-07	2.94e-06
ENSG00000002587	19.0656	7.74621	1.57102	4.93069	8.19e-07	3.05e-06
ENSG00000165259	18.4738	7.69363	1.57707	4.87845	1.07e-06	3.94e-06
ENSG00000165659	17.8052	7.6476	1.57973	4.84108	1.29e-06	4.72e-06
ENSG00000184388	17.8052	7.6476	1.57973	4.84108	1.29e-06	4.72e-06
ENSG00000168702	97.3355	7.64485	1.05568	7.24167	4.43e-13	2.63e-12
ENSG00000182986	95.7831	7.62109	1.06002	7.18954	6.5e-13	3.82e-12
ENSG00000164199	4592.21	7.60737	0.157327	48.3538	0	0
ENSG00000251188	17.4139	7.60601	1.59066	4.78166	1.74e-06	6.28e-06
ENSG00000253525	17.3297	7.60537	1.58169	4.80839	1.52e-06	5.53e-06
ENSG00000139973	47.2946	7.60346	1.47514	5.15439	2.54e-07	9.89e-07
ENSG00000115414	24156.6	7.57171	0.0776591	97.4992	0	0
ENSG00000137968	44.9321	7.52938	1.47786	5.0948	3.49e-07	1.34e-06
ENSG00000198947	89.545	7.5272	1.05934	7.10557	1.2e-12	6.93e-12
ENSG00000168505	1027.85	7.52315	0.316994	23.7328	1.65e-124	1.04e-122
ENSG00000163638	133.214	7.51664	0.86602	8.67953	3.97e-18	3.09e-17
ENSG00000016082	16.2525	7.51653	1.59287	4.71886	2.37e-06	8.48e-06
ENSG00000166840	16.1361	7.50143	1.59185	4.7124	2.45e-06	8.74e-06
ENSG00000124107	306.331	7.49282	0.567712	13.1983	8.98e-40	1.49e-38
ENSG00000147027	16.0445	7.49122	1.59442	4.69841	2.62e-06	9.34e-06
ENSG00000154065	301.757	7.47076	0.568205	13.148	1.75e-39	2.87e-38
ENSG00000182389	398.574	7.35573	0.481367	15.2809	1.03e-52	2.3e-51
ENSG00000158352	14.2912	7.32698	1.60996	4.55104	5.34e-06	1.85e-05
ENSG00000162373	14.0411	7.29791	1.61612	4.51569	6.31e-06	2.17e-05
ENSG00000151655	37.82	7.27898	1.48788	4.89219	9.97e-07	3.68e-06
ENSG00000244405	692.047	7.22781	0.348988	20.7108	2.77e-95	1.24e-93
ENSG00000196368	72.6091	7.21993	1.06948	6.75085	1.47e-11	7.91e-11
ENSG00000187678	1048.59	7.21709	0.283448	25.4618	5.23e-143	3.96e-141
ENSG00000145431	283.084	7.18612	0.535971	13.4077	5.45e-41	9.31e-40
ENSG00000066032	12.8301	7.17422	1.62902	4.40401	1.06e-05	3.56e-05
ENSG00000081052	659.408	7.15568	0.349453	20.4768	3.47e-93	1.51e-91
ENSG00000118523	204.209	7.12807	0.61937	11.5086	1.19e-30	1.5e-29
ENSG00000154822	33.9867	7.12673	1.4959	4.76417	1.9e-06	6.83e-06
ENSG00000113083	1043.88	7.11411	0.275249	25.8461	2.69e-147	2.15e-145
ENSG00000108602	12.1962	7.09506	1.63992	4.32647	1.52e-05	4.98e-05
ENSG00000171658	33.2191	7.09208	1.49857	4.73256	2.22e-06	7.95e-06
ENSG00000166546	12.1293	7.08817	1.63962	4.32307	1.54e-05	5.05e-05
ENSG00000169031	1812.33	7.08069	0.208667	33.9329	2.18e-252	4.01e-250
ENSG00000197603	98.7234	7.07992	0.876952	8.07333	6.84e-16	4.72e-15
ENSG00000119866	11.8197	7.05993	1.6514	4.27513	1.91e-05	6.21e-05
ENSG00000164690	11.7034	7.03938	1.64494	4.27942	1.87e-05	6.1e-05
ENSG00000121743	159.718	7.0382	0.680719	10.3394	4.68e-25	4.83e-24
ENSG00000124939	11.5696	7.02508	1.64819	4.2623	2.02e-05	6.56e-05
ENSG00000080493	11.5449	7.01807	1.64804	4.25843	2.06e-05	6.67e-05
ENSG00000029559	31.4905	7.01727	1.50129	4.67415	2.95e-06	1.05e-05
ENSG00000213045	11.478	7.01083	1.64874	4.25224	2.12e-05	6.84e-05
ENSG00000118507	31.0819	6.99602	1.50308	4.65444	3.25e-06	1.15e-05
ENSG00000164683	403.606	6.99484	0.423829	16.5039	3.44e-61	9.14e-60
ENSG00000105388	307.331	6.97848	0.482851	14.4527	2.41e-47	4.84e-46
ENSG00000153823	121.789	6.97066	0.763693	9.12756	7.01e-20	5.89e-19
ENSG00000138795	89.5085	6.93612	0.880237	7.87984	3.28e-15	2.19e-14
ENSG00000084453	29.7719	6.93056	1.51111	4.5864	4.51e-06	1.57e-05
ENSG00000173482	10.802	6.92163	1.66169	4.16543	3.11e-05	9.85e-05
ENSG00000064225	10.5098	6.88271	1.66698	4.12885	3.65e-05	0.000114655
ENSG00000132965	10.4677	6.88244	1.67071	4.11947	3.8e-05	0.000119231
ENSG00000242615	10.4677	6.88244	1.67071	4.11947	3.8e-05	0.000119231
ENSG00000116729	425.102	6.86176	0.397109	17.2793	6.74e-67	1.99e-65
ENSG00000174343	9.83371	6.78495	1.68308	4.03127	5.55e-05	0.000170575
ENSG00000242265	5231.99	6.77662	0.117338	57.7531	0	0
ENSG00000257966	26.3818	6.76035	1.5159	4.45964	8.21e-06	2.79e-05
ENSG00000152527	3024.25	6.75511	0.150641	44.8425	0	0
ENSG00000198300	25.0792	6.68908	1.52193	4.39512	1.11e-05	3.7e-05
ENSG00000135272	99.2073	6.67529	0.773673	8.62805	6.24e-18	4.82e-17
ENSG00000187210	5509.67	6.6639	0.11146	59.7872	0	0
ENSG00000254535	24.0614	6.62464	1.52482	4.34454	1.4e-05	4.6e-05
ENSG00000121297	95.7946	6.62225	0.774965	8.54522	1.28e-17	9.72e-17
ENSG00000101871	238.424	6.61204	0.489826	13.4988	1.59e-41	2.75e-40
ENSG00000155093	118.672	6.60734	0.693732	9.52435	1.66e-21	1.51e-20
ENSG00000255735	8.6401	6.59609	1.71749	3.84054	0.000122763	0.000363541
ENSG00000154240	23.477	6.58949	1.52699	4.31535	1.59e-05	5.23e-05
ENSG00000145147	94.3925	6.58709	0.775024	8.49921	1.91e-17	1.44e-16
ENSG00000064042	1190.38	6.57786	0.220659	29.8101	2.89e-195	3.34e-193
ENSG00000259495	8.3974	6.56624	1.72574	3.80487	0.000141877	0.000416475
ENSG00000106541	7474.94	6.55767	0.0962559	68.1275	0	0
ENSG00000177599	8.30578	6.54678	1.7228	3.80008	0.000144647	0.000424086
ENSG00000198739	8.28102	6.53703	1.72464	3.79037	0.000150423	0.00044054
ENSG00000164116	838.16	6.53618	0.257882	25.3456	1e-141	7.5e-140
ENSG00000170775	447.218	6.51992	0.349586	18.6504	1.25e-77	4.42e-76
ENSG00000136059	198.719	6.49964	0.5186	12.533	4.92e-36	7.4e-35
ENSG00000166510	598.643	6.45236	0.296638	21.7516	6.67e-105	3.43e-103
ENSG00000125207	7.72135	6.44355	1.74489	3.69281	0.000221793	0.000636731
ENSG00000187689	41.8452	6.42586	1.10401	5.82046	5.87e-09	2.61e-08
ENSG00000198053	230.352	6.42549	0.472552	13.5974	4.15e-42	7.31e-41
ENSG00000148948	7.67184	6.42277	1.75385	3.66211	0.000250151	0.00071357
ENSG00000157680	7.60497	6.41169	1.75198	3.65968	0.000252531	0.000720073
ENSG00000183671	7.56286	6.41127	1.74787	3.66805	0.000244407	0.000698111
ENSG00000168542	143.893	6.3946	0.59132	10.8141	2.95e-27	3.3e-26
ENSG00000197619	40.6416	6.38949	1.11327	5.73938	9.5e-09	4.17e-08
ENSG00000078053	121.674	6.376	0.638692	9.98291	1.81e-23	1.77e-22
ENSG00000086205	7.31276	6.35591	1.76157	3.60809	0.000308455	0.000871109
ENSG00000166750	1627.54	6.3244	0.176687	35.7944	1.35e-280	3.09e-278
ENSG00000259030	7.02054	6.2979	1.77214	3.55384	0.000379646	0.00106212
ENSG00000133636	6.88681	6.27387	1.77474	3.53509	0.000407629	0.00113568
ENSG00000146409	320.43	6.26773	0.382555	16.3839	2.49e-60	6.53e-59
ENSG00000196353	110.867	6.23615	0.644717	9.6727	3.94e-22	3.68e-21
ENSG00000107611	6.66146	6.225	1.78531	3.48678	0.000488874	0.00135015
ENSG00000196581	6.61935	6.22437	1.79751	3.46277	0.000534653	0.00146753
ENSG00000184985	306.687	6.20056	0.385009	16.105	2.35e-58	5.94e-57
ENSG00000107249	17.8356	6.18382	1.55802	3.96903	7.22e-05	0.000219108
ENSG00000021488	6.27763	6.13543	1.80934	3.39098	0.000696422	0.00188085
ENSG00000128739	6.27763	6.13543	1.80934	3.39098	0.000696422	0.00188085
ENSG00000184486	17.2167	6.13329	1.56777	3.91212	9.15e-05	0.000274486
ENSG00000159899	97.6539	6.11096	1.51938	4.022	5.77e-05	0.000176951
ENSG00000109738	50.5922	6.10207	0.913806	6.67764	2.43e-11	1.29e-10
ENSG00000147408	789.461	6.09735	0.235383	25.904	6e-148	4.84e-146
ENSG00000268225	6.07704	6.09484	1.81518	3.3577	0.000785933	0.00210332
ENSG00000155966	16.34	6.05799	1.57285	3.8516	0.000117348	0.000348128
ENSG00000172318	15.9412	6.01414	1.57253	3.82449	0.000131042	0.000386622
ENSG00000215795	5.76007	6.01112	1.8391	3.26851	0.00108115	0.0028392
ENSG00000121895	5.65109	5.99582	1.84949	3.24187	0.00118747	0.00309889
ENSG00000149269	741.241	5.97943	0.235664	25.3728	5.04e-142	3.79e-140
ENSG00000058091	293.145	5.97727	0.36927	16.1867	6.26e-59	1.6e-57
ENSG00000127990	737.888	5.97056	0.234054	25.5093	1.56e-143	1.19e-141
ENSG00000251689	5.60158	5.96757	1.8588	3.21044	0.00132531	0.00343526
ENSG00000074527	368.788	5.96703	0.328427	18.1685	9.16e-74	3.02e-72
ENSG00000163362	930.003	5.95854	0.210002	28.3737	4.27e-177	4.31e-175
ENSG00000188817	45.3227	5.94733	0.923884	6.43732	1.22e-10	6.12e-10
ENSG00000053747	877.091	5.94688	0.214411	27.7359	2.58e-169	2.47e-167
ENSG00000128512	1452.1	5.93009	0.167622	35.3776	3.77e-274	8.03e-272
ENSG00000152217	58.812	5.89794	0.802026	7.3538	1.93e-13	1.17e-12
ENSG00000073737	5.26726	5.89038	1.86805	3.15322	0.00161482	0.00413389
ENSG00000183580	28.5544	5.87682	1.15131	5.10448	3.32e-07	1.27e-06
ENSG00000213759	5.2425	5.87507	1.87419	3.13473	0.00172015	0.00438684
ENSG00000258591	5.20039	5.87442	1.8768	3.13002	0.00174797	0.00445198
ENSG00000169851	14.2524	5.86561	1.59174	3.68503	0.000228676	0.000654828
ENSG00000183230	5.13353	5.85818	1.8884	3.1022	0.00192089	0.00485618
ENSG00000166974	137.061	5.83908	0.933759	6.2533	4.02e-10	1.95e-09
ENSG00000139174	55.7291	5.82543	0.805804	7.22934	4.85e-13	2.87e-12
ENSG00000139910	111.331	5.81496	0.573045	10.1475	3.4e-24	3.41e-23
ENSG00000168032	137.009	5.80244	0.511832	11.3366	8.64e-30	1.06e-28
ENSG00000152454	95.1529	5.78638	0.611286	9.46591	2.91e-21	2.61e-20
ENSG00000137872	13.3684	5.7624	1.6075	3.5847	0.000337465	0.000950041
ENSG00000074047	4.81656	5.75924	1.90197	3.02805	0.0024614	0.00612901
ENSG00000237917	4.81656	5.75924	1.90197	3.02805	0.0024614	0.00612901
ENSG00000109819	40.3275	5.7584	0.93786	6.13993	8.26e-10	3.92e-09
ENSG00000148735	754.969	5.74925	0.219364	26.2087	2.11e-151	1.77e-149
ENSG00000215811	13.1009	5.73659	1.60447	3.57539	0.000349711	0.000982588
ENSG00000221923	25.9765	5.72949	1.1533	4.9679	6.77e-07	2.54e-06
ENSG00000200222	4.68283	5.72409	1.92097	2.9798	0.00288441	0.00711315
ENSG00000171385	381.641	5.69119	0.300577	18.9342	5.96e-80	2.17e-78
ENSG00000139318	947.862	5.68358	0.437634	12.9871	1.45e-38	2.33e-37
ENSG00000164647	12.5586	5.6711	1.61733	3.50647	0.000454097	0.00125911
ENSG00000121318	4.52434	5.67061	1.92933	2.93917	0.00329093	0.00803189
ENSG00000257591	4.43272	5.63399	1.94095	2.9027	0.00369966	0.00893671
ENSG00000172478	428.031	5.63071	0.281477	20.0041	5.07e-89	2.08e-87
ENSG00000185477	12.0906	5.62299	1.61803	3.4752	0.000510472	0.00140546
ENSG00000036448	4.36586	5.61497	1.94424	2.888	0.00387695	0.00933818
ENSG00000138435	11.9568	5.60903	1.62238	3.45728	0.000545662	0.00149584
ENSG00000184635	143.57	5.60297	0.474111	11.8179	3.16e-32	4.15e-31
ENSG00000147251	464.922	5.59562	0.26564	21.0647	1.68e-98	7.92e-97
ENSG00000198467	2394.75	5.58723	0.1224	45.6473	0	0
ENSG00000139289	1323.83	5.57047	0.159502	34.9242	3.19e-267	6.48e-265
ENSG00000110195	210.917	5.56793	0.389256	14.304	2.06e-46	4.02e-45
ENSG00000164047	34.6942	5.56288	0.954536	5.82783	5.62e-09	2.51e-08
ENSG00000127329	244.116	5.55893	0.360299	15.4286	1.05e-53	2.41e-52
ENSG00000184500	193.389	5.5315	0.403562	13.7067	9.26e-43	1.66e-41
ENSG00000264357	4.00678	5.49607	1.98494	2.76888	0.00562495	0.0132156
ENSG00000120068	3.98203	5.47602	1.99763	2.74127	0.00612031	0.0142874
ENSG00000197705	3.98203	5.47602	1.99763	2.74127	0.00612031	0.0142874
ENSG00000270200	3.93992	5.47504	1.99881	2.73915	0.0061598	0.0143702
ENSG00000101144	23949.2	5.47176	0.0576379	94.9333	0	0
ENSG00000185585	293.223	5.4638	0.324397	16.8429	1.18e-63	3.29e-62
ENSG00000196090	32.4678	5.45556	0.9569	5.70128	1.19e-08	5.18e-08
ENSG00000206538	3.87305	5.45352	2.01782	2.70268	0.00687819	0.0159201
ENSG00000136653	367.885	5.45226	0.286636	19.0215	1.13e-80	4.14e-79
ENSG00000132170	290.601	5.44272	0.322038	16.9009	4.43e-64	1.24e-62
ENSG00000159905	10.7655	5.43531	1.63825	3.31775	0.00090747	0.00240612
ENSG00000102243	3.8483	5.43312	2.00293	2.71259	0.00667598	0.0154854
ENSG00000214659	3.8483	5.43312	2.00293	2.71259	0.00667598	0.0154854
ENSG00000058085	529.183	5.42139	0.238201	22.7597	1.15e-114	6.51e-113
ENSG00000240038	41.9953	5.41508	0.833086	6.50003	8.03e-11	4.1e-10
ENSG00000270510	3.78143	5.41125	2.01179	2.68978	0.00715002	0.0164978
ENSG00000214814	31.1629	5.40724	0.968644	5.58228	2.37e-08	1.01e-07
ENSG00000146648	551.083	5.39299	0.232185	23.2271	2.42e-119	1.45e-117
ENSG00000105523	78.7187	5.3808	1.8054	2.98039	0.00287883	0.0071002
ENSG00000130643	20.4267	5.3689	1.17802	4.55755	5.18e-06	1.79e-05
ENSG00000114251	71.1397	5.36769	0.634965	8.45352	2.83e-17	2.1e-16
ENSG00000134531	91.1903	5.36221	0.560463	9.56746	1.1e-21	1e-20
ENSG00000131773	162.851	5.35923	0.419481	12.7759	2.24e-37	3.48e-36
ENSG00000170577	816.771	5.35121	0.197268	27.1266	4.78e-162	4.28e-160
ENSG00000086548	793.849	5.34639	0.193242	27.6668	1.75e-168	1.67e-166
ENSG00000196376	3.62295	5.3444	2.03442	2.62699	0.00861438	0.0196075
ENSG00000150471	69.6021	5.3387	0.638658	8.35924	6.31e-17	4.61e-16
ENSG00000168594	3.55608	5.32113	2.04231	2.60545	0.0091754	0.0207876
ENSG00000169621	19.4067	5.30368	1.19306	4.44543	8.77e-06	2.97e-05
ENSG00000184185	9.63647	5.28786	1.66285	3.18	0.00147274	0.00379457
ENSG00000156140	48.4641	5.28645	0.750776	7.04131	1.9e-12	1.09e-11
ENSG00000143995	255.413	5.25329	0.327166	16.057	5.11e-58	1.28e-56
ENSG00000180801	56.4659	5.24237	0.688886	7.60993	2.74e-14	1.74e-13
ENSG00000146592	46.6613	5.22912	0.755412	6.92221	4.45e-12	2.47e-11
ENSG00000233690	3.33073	5.225	2.07731	2.51527	0.011894	0.0263448
ENSG00000253485	183.826	5.21746	0.385052	13.55	7.92e-42	1.38e-40
ENSG00000150630	136.646	5.20009	0.43911	11.8423	2.36e-32	3.12e-31
ENSG00000222222	3.26387	5.1997	2.08944	2.48856	0.0128261	0.0282119
ENSG00000197971	745.741	5.19328	0.192337	27.0009	1.44e-160	1.28e-158
ENSG00000129682	377.946	5.17922	0.26621	19.4554	2.62e-84	1e-82
ENSG00000171714	8.96042	5.17851	1.67989	3.08265	0.00205165	0.00516974
ENSG00000172348	3.23911	5.17523	2.11491	2.44702	0.0144044	0.0313502
ENSG00000228208	3.197	5.17384	2.10781	2.4546	0.0141042	0.0307465
ENSG00000121406	133.714	5.16976	0.441653	11.7055	1.19e-31	1.55e-30
ENSG00000236710	3.17225	5.14877	2.11304	2.43666	0.0148235	0.0321906
ENSG00000187398	17.4701	5.14791	1.21183	4.24804	2.16e-05	6.96e-05
ENSG00000168481	3.13014	5.14727	2.13408	2.41195	0.0158677	0.034237
ENSG00000073146	103.753	5.1227	0.49343	10.3818	3e-25	3.13e-24
ENSG00000146411	34.4745	5.12195	0.855281	5.98861	2.12e-09	9.77e-09
ENSG00000176597	26.1008	5.1213	0.985256	5.19793	2.02e-07	7.92e-07
ENSG00000143196	3.03852	5.09482	2.12893	2.39313	0.0167052	0.0358266
ENSG00000207339	3.03852	5.09482	2.12893	2.39313	0.0167052	0.0358266
ENSG00000240902	3.03852	5.09482	2.12893	2.39313	0.0167052	0.0358266
ENSG00000162981	218.358	5.08437	0.343393	14.8062	1.33e-49	2.8e-48
ENSG00000183831	16.6948	5.07526	1.22103	4.15656	3.23e-05	0.000102187
ENSG00000154269	25.4518	5.0722	0.995767	5.09376	3.51e-07	1.35e-06
ENSG00000115844	258.229	5.0679	0.311739	16.2569	2e-59	5.16e-58
ENSG00000198774	2.97165	5.06705	2.14687	2.3602	0.018265	0.0388179
ENSG00000236993	2.97165	5.06705	2.14687	2.3602	0.018265	0.0388179
ENSG00000178772	8.26931	5.04734	1.6986	2.97148	0.0029637	0.00729198
ENSG00000167755	8.11083	5.01599	1.70177	2.94751	0.00320341	0.00783694
ENSG00000112246	2.88003	5.01112	2.16541	2.31417	0.0206586	0.0434372
ENSG00000153157	2.88003	5.01112	2.16541	2.31417	0.0206586	0.0434372
ENSG00000173376	2.88003	5.01112	2.16541	2.31417	0.0206586	0.0434372
ENSG00000108244	31.4585	4.99788	0.875576	5.70811	1.14e-08	4.99e-08
ENSG00000109814	8594.18	4.9899	0.0673512	74.0877	0	0
ENSG00000064787	2608.98	4.98704	0.103639	48.1195	0	0
ENSG00000102445	2.7463	4.95169	2.19225	2.25873	0.0239004	0.0495084
ENSG00000165972	2.7463	4.95169	2.19225	2.25873	0.0239004	0.0495084
ENSG00000163898	308.299	4.94994	0.278551	17.7703	1.2e-70	3.75e-69
ENSG00000170624	2.67944	4.92087	2.21856	2.21804	0.0265518	0.0544501
ENSG00000218416	30.1605	4.9173	0.868754	5.66018	1.51e-08	6.53e-08
ENSG00000163993	5403.46	4.89152	0.0812451	60.2069	0	0
ENSG00000161055	2.65468	4.89104	2.22206	2.20113	0.0277268	0.0566598
ENSG00000042980	2.61257	4.88897	2.2578	2.16537	0.0303592	0.061438
ENSG00000171243	7.34086	4.88566	1.72997	2.82413	0.00474092	0.0112566
ENSG00000091409	656.143	4.855	0.191384	25.3678	5.72e-142	4.29e-140
ENSG00000206892	2.52095	4.82628	2.2456	2.14922	0.0316172	0.0636784
ENSG00000241478	2.52095	4.82628	2.2456	2.14922	0.0316172	0.0636784
ENSG00000244607	2.52095	4.82628	2.2456	2.14922	0.0316172	0.0636784
ENSG00000153162	92.223	4.82498	0.488212	9.88296	4.94e-23	4.78e-22
ENSG00000128602	2.4962	4.79504	2.30229	2.08272	0.0372765	0.0737033
ENSG00000154262	2.4962	4.79504	2.30229	2.08272	0.0372765	0.0737033
ENSG00000203306	2.45409	4.79271	2.27185	2.10961	0.0348923	0.0695712
ENSG00000149260	373.562	4.78905	0.24433	19.6007	1.52e-85	5.98e-84
ENSG00000175471	562.119	4.77584	0.198922	24.0086	2.26e-127	1.47e-125
ENSG00000198189	278.989	4.76268	0.280139	17.0011	8.06e-65	2.29e-63
ENSG00000235631	6.78349	4.74958	1.7516	2.71157	0.00669656	0.0155315
ENSG00000150782	33.6132	4.74282	0.792105	5.98762	2.13e-09	9.83e-09
ENSG00000102290	2.36247	4.72485	2.29462	2.0591	0.039485	0.077564
ENSG00000130433	2.36247	4.72485	2.29462	2.0591	0.039485	0.077564
ENSG00000138944	2.36247	4.72485	2.29462	2.0591	0.039485	0.077564
ENSG00000204930	2.36247	4.72485	2.29462	2.0591	0.039485	0.077564
ENSG00000214338	2.36247	4.72485	2.29462	2.0591	0.039485	0.077564
ENSG00000107159	2.32036	4.72156	2.37799	1.98552	0.0470863	0.0907801
ENSG00000241978	2.32036	4.72156	2.37799	1.98552	0.0470863	0.0907801
ENSG00000125398	330.108	4.71753	0.256025	18.4261	8.12e-76	2.78e-74
ENSG00000122012	6.625	4.71089	1.75734	2.68069	0.00734702	0.0169036
ENSG00000053918	13.2079	4.70367	1.26311	3.72388	0.000196183	0.000566381
ENSG00000143344	588.648	4.70168	0.193322	24.3205	1.19e-130	8.05e-129
ENSG00000164825	2.2956	4.6889	2.30923	2.03051	0.0423049	0.0824707
ENSG00000176571	2.2956	4.6889	2.30923	2.03051	0.0423049	0.0824707
ENSG00000265724	2.2956	4.6889	2.30923	2.03051	0.0423049	0.0824707
ENSG00000137561	6.43947	4.68688	1.76987	2.64814	0.00809355	0.0184905
ENSG00000068366	172.701	4.66647	0.347377	13.4335	3.85e-41	6.6e-40
ENSG00000139572	2.22874	4.65201	2.33521	1.99211	0.0463586	0.0895295
ENSG00000164266	2.22874	4.65201	2.33521	1.99211	0.0463586	0.0895295
ENSG00000250483	2.22874	4.65201	2.33521	1.99211	0.0463586	0.0895295
ENSG00000269501	31.3898	4.65029	0.814059	5.71248	1.11e-08	4.86e-08
ENSG00000104967	25.2275	4.64666	0.896343	5.18402	2.17e-07	8.52e-07
ENSG00000082684	6.33279	4.64407	1.77122	2.62196	0.00874263	0.0198825
ENSG00000160191	270.884	4.64281	0.278847	16.65	3.02e-62	8.24e-61
ENSG00000136153	1915.62	4.62102	0.111241	41.5407	0	0
ENSG00000122694	289.121	4.6091	0.266783	17.2765	7.07e-67	2.08e-65
ENSG00000154118	186.914	4.58111	0.327983	13.9675	2.46e-44	4.6e-43
ENSG00000196954	161.995	4.58029	0.354161	12.9328	2.94e-38	4.68e-37
ENSG00000177283	130.225	4.55558	0.388755	11.7184	1.03e-31	1.33e-30
ENSG00000145569	230.306	4.54923	0.293396	15.5054	3.19e-54	7.44e-53
ENSG00000203952	47.134	4.5415	0.64186	7.07553	1.49e-12	8.56e-12
ENSG00000113205	257.55	4.5362	0.277598	16.3409	5.05e-60	1.32e-58
ENSG00000158125	5.83028	4.53266	1.81419	2.49845	0.0124737	0.0275128
ENSG00000081853	51.8751	4.51969	0.609829	7.41141	1.25e-13	7.67e-13
ENSG00000103460	40.7788	4.51778	0.693198	6.51731	7.16e-11	3.67e-10
ENSG00000185532	52.0208	4.51525	0.606837	7.44063	1e-13	6.2e-13
ENSG00000140092	5.74836	4.50031	1.80476	2.49359	0.012646	0.02787
ENSG00000198363	6141.82	4.49675	0.0695957	64.6125	0	0
ENSG00000072182	27.9478	4.4899	0.836858	5.36519	8.09e-08	3.28e-07
ENSG00000239903	45.5071	4.48515	0.651536	6.88397	5.82e-12	3.21e-11
ENSG00000119715	5.68149	4.48498	1.81298	2.47382	0.0133678	0.0293016
ENSG00000016402	296.256	4.47007	0.255094	17.5232	9.53e-69	2.9e-67
ENSG00000135447	5.65674	4.46965	1.80838	2.47163	0.0134499	0.0294665
ENSG00000184564	11723.6	4.45854	0.05658	78.8006	0	0
ENSG00000065609	5.49596	4.45653	1.82109	2.44717	0.0143982	0.0313398
ENSG00000117983	10907.2	4.44876	0.155882	28.5393	3.82e-179	3.91e-177
ENSG00000183696	143.254	4.4483	0.363222	12.2468	1.75e-34	2.48e-33
ENSG00000164379	5.42909	4.44092	1.82902	2.42804	0.0151808	0.0329095
ENSG00000160180	4608.39	4.43711	0.0765052	57.9975	0	0
ENSG00000061918	195.282	4.43304	0.316967	13.9858	1.9e-44	3.57e-43
ENSG00000154898	10.6997	4.42806	1.31918	3.35667	0.000788863	0.00211011
ENSG00000186288	5.36223	4.42506	1.83959	2.40546	0.0161522	0.0347742
ENSG00000185015	37.961	4.4245	0.695789	6.35897	2.03e-10	1.01e-09
ENSG00000269559	5.49825	4.42237	1.82299	2.42589	0.0152707	0.0330884
ENSG00000172551	358.647	4.4194	0.23479	18.8227	4.92e-79	1.76e-77
ENSG00000161638	1273.4	4.41139	0.128773	34.2572	3.41e-257	6.61e-255
ENSG00000254944	5.43139	4.40647	1.82343	2.41658	0.015667	0.0338515
ENSG00000118508	388.321	4.39597	0.222064	19.796	3.23e-87	1.3e-85
ENSG00000107165	320.95	4.37813	0.240174	18.229	3.04e-74	1.01e-72
ENSG00000213071	5.13688	4.35973	1.85279	2.35306	0.0186197	0.0394936
ENSG00000126733	5.2729	4.35704	1.84082	2.3669	0.0179378	0.0382168
ENSG00000170485	495.383	4.34819	0.194371	22.3706	7.61e-111	4.19e-109
ENSG00000120738	5971.67	4.33369	0.0724504	59.8159	0	0
ENSG00000146072	1880.76	4.3266	0.108138	40.0101	0	0
ENSG00000152495	5.13917	4.32358	1.84202	2.3472	0.0189153	0.0400772
ENSG00000179603	5.09706	4.32306	1.86216	2.32152	0.0202585	0.0426669
ENSG00000149289	202.402	4.32242	0.300352	14.3912	5.88e-47	1.16e-45
ENSG00000164023	880.031	4.31662	0.147528	29.2597	3.38e-188	3.69e-186
ENSG00000177398	43.1712	4.30974	1.90359	2.26401	0.0235735	0.0489301
ENSG00000081803	1620.87	4.30971	0.111676	38.5911	0	0
ENSG00000135547	10.1446	4.2981	1.32308	3.24855	0.00115994	0.00302999
ENSG00000171234	4.95364	4.2908	1.8632	2.30292	0.0212833	0.044633
ENSG00000198483	14.8729	4.27647	1.07965	3.96096	7.46e-05	0.000226353
ENSG00000118432	4.84696	4.23564	1.86328	2.27322	0.0230132	0.0478732
ENSG00000132837	85.4124	4.22355	0.449418	9.39782	5.57e-21	4.93e-20
ENSG00000214960	18.6283	4.21829	0.969182	4.35243	1.35e-05	4.45e-05
ENSG00000110002	41.9467	4.18526	0.635576	6.58499	4.55e-11	2.37e-10
ENSG00000138759	1161.7	4.18337	0.126436	33.0869	4.58e-240	7.64e-238
ENSG00000179023	36.3673	4.16964	0.682015	6.11371	9.73e-10	4.6e-09
ENSG00000148942	90.6374	4.16701	0.442864	9.40923	5e-21	4.44e-20
ENSG00000172379	671.01	4.16023	0.162653	25.5773	2.73e-144	2.1e-142
ENSG00000007306	17.5264	4.12773	0.984111	4.19437	2.74e-05	8.73e-05
ENSG00000128815	4.39397	4.12422	1.91396	2.15481	0.0311767	0.0628912
ENSG00000203697	403.235	4.11478	0.205365	20.0364	2.65e-89	1.09e-87
ENSG00000181634	201.973	4.1089	0.288729	14.231	5.88e-46	1.14e-44
ENSG00000139946	52.4027	4.10476	0.564913	7.26617	3.7e-13	2.2e-12
ENSG00000085276	126.841	4.1042	0.362377	11.3258	9.78e-30	1.19e-28
ENSG00000173338	4.36921	4.10382	1.90825	2.15057	0.0315102	0.0635104
ENSG00000105877	8.95101	4.10339	1.35885	3.01974	0.00252988	0.0062886
ENSG00000176222	48.1619	4.10091	0.580317	7.06668	1.59e-12	9.11e-12
ENSG00000174099	91.8629	4.09824	0.421314	9.72726	2.31e-22	2.17e-21
ENSG00000261115	412.624	4.0943	0.209753	19.5196	7.48e-85	2.9e-83
ENSG00000124225	17585.3	4.09118	0.0542937	75.3527	0	0
ENSG00000112541	74.0744	4.09059	0.467582	8.74839	2.16e-18	1.7e-17
ENSG00000139915	8.6565	4.08551	1.36125	3.0013	0.0026883	0.00666007
ENSG00000233820	4.39626	4.08243	1.9036	2.14459	0.031986	0.064355
ENSG00000120833	1007.27	4.07641	0.134943	30.2083	1.84e-200	2.18e-198
ENSG00000188404	8.56488	4.06503	1.35844	2.99242	0.00276775	0.00684115
ENSG00000142303	8.49801	4.05486	1.36234	2.9764	0.00291658	0.00718673
ENSG00000164794	17.1989	4.05386	0.967395	4.19049	2.78e-05	8.87e-05
ENSG00000170017	15900.5	4.04503	0.0534041	75.7437	0	0
ENSG00000164675	4.26253	4.04183	1.91643	2.10905	0.0349406	0.069661
ENSG00000136114	16.9218	4.03885	0.973358	4.1494	3.33e-05	0.000105297
ENSG00000105711	312.213	4.02137	0.233397	17.2297	1.59e-66	4.63e-65
ENSG00000184584	12.3744	4.0204	1.12891	3.56132	0.000369	0.00103381
ENSG00000162909	6476.2	4.01247	0.0637092	62.981	0	0
ENSG00000169469	4.077	4.00044	1.93621	2.06612	0.0388175	0.0764341
ENSG00000207357	4.17091	3.99925	1.92783	2.07448	0.0380346	0.0750643
ENSG00000233719	4.17091	3.99925	1.92783	2.07448	0.0380346	0.0750643
ENSG00000120875	1141.05	3.99532	0.123938	32.2366	5.43e-228	7.73e-226
ENSG00000101384	267.443	3.98986	0.253314	15.7506	6.8e-56	1.65e-54
ENSG00000109790	1077.75	3.9811	0.12661	31.4437	5.12e-217	6.8e-215
ENSG00000214274	81.2303	3.97537	0.445987	8.91363	4.94e-19	4.03e-18
ENSG00000153071	28.246	3.96966	0.739486	5.36813	7.96e-08	3.23e-07
ENSG00000130052	96.2434	3.96235	0.401166	9.87708	5.23e-23	5.06e-22
ENSG00000164099	56.284	3.96168	0.524971	7.54648	4.47e-14	2.8e-13
ENSG00000106772	20.3099	3.95973	0.888299	4.45765	8.29e-06	2.82e-05
ENSG00000139044	632.812	3.94185	0.161559	24.3988	1.76e-131	1.21e-129
ENSG00000099954	267.086	3.94118	0.251659	15.6608	2.8e-55	6.69e-54
ENSG00000078898	19.3746	3.94117	0.91197	4.3216	1.55e-05	5.08e-05
ENSG00000185261	282.091	3.93913	0.246657	15.9701	2.07e-57	5.13e-56
ENSG00000239332	3.8764	3.93521	1.97214	1.9954	0.0459992	0.0889195
ENSG00000150281	47.0288	3.93487	0.573726	6.85845	6.96e-12	3.82e-11
ENSG00000259205	3.97032	3.93417	1.95024	2.01727	0.043667	0.0848034
ENSG00000134398	3.94556	3.91098	1.9556	1.99988	0.0455127	0.088054
ENSG00000196622	19.5002	3.89696	0.895726	4.35062	1.36e-05	4.48e-05
ENSG00000105810	176.864	3.89393	0.300169	12.9725	1.75e-38	2.81e-37
ENSG00000197863	68.86	3.89364	0.467708	8.32494	8.44e-17	6.13e-16
ENSG00000099256	229.828	3.89174	0.258501	15.0551	3.2e-51	6.92e-50
ENSG00000177025	3.78478	3.88909	1.96902	1.97513	0.0482529	0.0928296
ENSG00000225774	3.78478	3.88909	1.96902	1.97513	0.0482529	0.0928296
ENSG00000170477	19.0449	3.88869	0.88518	4.39311	1.12e-05	3.73e-05
ENSG00000140511	34.1442	3.88731	0.664151	5.85305	4.83e-09	2.17e-08
ENSG00000010310	84.936	3.88544	0.443695	8.75701	2e-18	1.58e-17
ENSG00000142494	94.764	3.8825	0.403315	9.62648	6.18e-22	5.72e-21
ENSG00000071575	161.925	3.86859	0.305765	12.6522	1.09e-36	1.66e-35
ENSG00000212237	3.81183	3.86541	1.96373	1.9684	0.0490225	0.0941669
ENSG00000215182	14.6463	3.85776	1.03162	3.73953	0.000184365	0.000533553
ENSG00000124813	283.345	3.85062	0.231863	16.6073	6.17e-62	1.67e-60
ENSG00000185710	29.5519	3.83504	0.705073	5.43921	5.35e-08	2.2e-07
ENSG00000182771	18.4875	3.83218	0.890931	4.30133	1.7e-05	5.55e-05
ENSG00000154127	113.319	3.82037	0.361052	10.5812	3.64e-26	3.93e-25
ENSG00000198157	152.107	3.80545	0.313136	12.1527	5.55e-34	7.77e-33
ENSG00000225968	43.7912	3.80093	0.590103	6.44113	1.19e-10	5.98e-10
ENSG00000170381	226.655	3.79255	0.260788	14.5427	6.5e-48	1.32e-46
ENSG00000119514	1608.75	3.78273	0.104245	36.2867	2.62e-288	6.19e-286
ENSG00000022267	142.853	3.7818	0.322734	11.718	1.03e-31	1.34e-30
ENSG00000127249	17.6433	3.76319	0.921336	4.08449	4.42e-05	0.00013777
ENSG00000167914	10.5987	3.75841	1.16122	3.2366	0.00120962	0.00315364
ENSG00000174370	31.4574	3.75549	0.689762	5.44462	5.19e-08	2.14e-07
ENSG00000253910	118.425	3.74454	0.349084	10.7268	7.62e-27	8.42e-26
ENSG00000183484	124.106	3.72446	0.343921	10.8294	2.5e-27	2.8e-26
ENSG00000184867	197.577	3.71156	0.275572	13.4686	2.39e-41	4.12e-40
ENSG00000139182	1037.85	3.70852	0.1239	29.9316	7.64e-197	8.93e-195
ENSG00000145819	2990.14	3.69633	0.0799052	46.2589	0	0
ENSG00000111961	1568.34	3.69553	0.103481	35.7121	2.56e-279	5.75e-277
ENSG00000180806	187.82	3.68758	0.277137	13.306	2.14e-40	3.6e-39
ENSG00000148700	1493.21	3.6841	0.104949	35.1038	5.9e-270	1.21e-267
ENSG00000170647	13.5091	3.68038	1.02217	3.60057	0.000317515	0.000896223
ENSG00000122877	43.3543	3.67991	0.567407	6.48548	8.84e-11	4.5e-10
ENSG00000179061	9.96244	3.67936	1.18053	3.1167	0.00182888	0.00464486
ENSG00000204920	72.6572	3.66757	0.439512	8.34465	7.14e-17	5.2e-16
ENSG00000070526	6.62835	3.66647	1.43816	2.54942	0.0107902	0.0241284
ENSG00000243566	59.952	3.66495	0.491595	7.45522	8.97e-14	5.56e-13
ENSG00000204152	30.2806	3.66253	1.46402	2.50168	0.0123604	0.0272797
ENSG00000108176	389.42	3.66234	0.197219	18.5699	5.63e-77	1.96e-75
ENSG00000138772	2027.67	3.65683	0.0930704	39.291	0	0
ENSG00000268172	9.76184	3.65272	1.18699	3.07729	0.00208891	0.00525807
ENSG00000026652	6.6036	3.65235	1.4542	2.51159	0.0120188	0.0265965
ENSG00000188779	9.80395	3.65218	1.18814	3.07385	0.00211313	0.00531407
ENSG00000215018	104.442	3.65198	0.368242	9.91734	3.5e-23	3.4e-22
ENSG00000124493	226.392	3.64895	0.252812	14.4334	3.19e-47	6.37e-46
ENSG00000189423	16.3504	3.64253	0.918438	3.96601	7.31e-05	0.000221807
ENSG00000143195	6.33384	3.63921	1.49754	2.43013	0.0150934	0.0327339
ENSG00000175832	199.596	3.6299	0.26759	13.5652	6.44e-42	1.13e-40
ENSG00000106070	1722.78	3.62493	0.0982877	36.8808	9.39e-298	2.38e-295
ENSG00000172164	324.019	3.61882	0.209925	17.2387	1.36e-66	3.97e-65
ENSG00000197991	9.45993	3.61703	1.24311	2.90967	0.0036181	0.00874999
ENSG00000250892	19.4119	3.61152	0.859102	4.20384	2.62e-05	8.39e-05
ENSG00000041353	14189	3.60084	0.0592121	60.8125	0	0
ENSG00000162849	9.28409	3.59695	1.23118	2.92155	0.00348294	0.00846212
ENSG00000156463	57.1115	3.59574	0.500454	7.18496	6.72e-13	3.94e-12
ENSG00000111452	126.304	3.59395	0.332036	10.824	2.65e-27	2.97e-26
ENSG00000182742	6.08374	3.56738	1.50076	2.37705	0.0174518	0.0372884
ENSG00000185869	101.392	3.55591	0.378472	9.39545	5.7e-21	5.04e-20
ENSG00000180616	18.5253	3.5538	0.879064	4.04271	5.28e-05	0.000163019
ENSG00000197479	33.5289	3.53947	0.630652	5.61239	2e-08	8.53e-08
ENSG00000186026	18.3745	3.53939	0.857172	4.12915	3.64e-05	0.000114523
ENSG00000064666	2394.2	3.5331	0.0879204	40.1852	0	0
ENSG00000125931	6.04392	3.52513	1.47082	2.39671	0.0165431	0.0355233
ENSG00000143147	51.0612	3.51374	0.511812	6.86529	6.64e-12	3.65e-11
ENSG00000117525	123.105	3.51218	0.330416	10.6296	2.17e-26	2.36e-25
ENSG00000174672	123.184	3.51012	0.332485	10.5572	4.7e-26	5.05e-25
ENSG00000158747	26.9006	3.50963	0.700292	5.01167	5.4e-07	2.04e-06
ENSG00000130822	5.91019	3.49549	1.48633	2.35177	0.0186844	0.0396115
ENSG00000198515	20.859	3.49278	0.79824	4.3756	1.21e-05	4.02e-05
ENSG00000101198	11.9143	3.48843	1.0621	3.28446	0.00102177	0.00269127
ENSG00000162552	188.661	3.48709	0.266544	13.0826	4.14e-39	6.73e-38
ENSG00000197959	1732.18	3.48597	0.0960527	36.2923	2.14e-288	5.12e-286
ENSG00000158715	126.404	3.48485	0.326002	10.6896	1.14e-26	1.25e-25
ENSG00000168646	32.4022	3.48475	0.637101	5.4697	4.51e-08	1.87e-07
ENSG00000136205	2100.81	3.4762	0.0910029	38.1987	0	0
ENSG00000169116	169.287	3.47546	0.28381	12.2457	1.77e-34	2.51e-33
ENSG00000171522	66.8236	3.47387	0.45518	7.63186	2.31e-14	1.48e-13
ENSG00000122547	61.9202	3.47258	0.471131	7.37073	1.7e-13	1.03e-12
ENSG00000106003	3683.78	3.46988	0.0754725	45.9754	0	0
ENSG00000102879	426.953	3.46697	0.18856	18.3866	1.68e-75	5.71e-74
ENSG00000171044	69.509	3.46348	0.439647	7.87787	3.33e-15	2.22e-14
ENSG00000130294	483.962	3.46024	0.181766	19.0368	8.46e-81	3.11e-79
ENSG00000110693	37.4357	3.45072	0.588857	5.86004	4.63e-09	2.08e-08
ENSG00000112812	508.847	3.4478	0.164922	20.9057	4.75e-97	2.21e-95
ENSG00000198453	80.5339	3.44511	0.402967	8.54935	1.24e-17	9.39e-17
ENSG00000064655	2217.95	3.44493	0.0871675	39.5208	0	0
ENSG00000154229	366.073	3.44088	0.192511	17.8737	1.89e-71	5.97e-70
ENSG00000167555	171.173	3.44018	0.279917	12.29	1.03e-34	1.47e-33
ENSG00000132692	51.4484	3.43817	0.504363	6.81685	9.31e-12	5.06e-11
ENSG00000124406	460.098	3.43586	0.173507	19.8024	2.84e-87	1.15e-85
ENSG00000130270	50.976	3.4318	0.510325	6.72473	1.76e-11	9.4e-11
ENSG00000182902	31.1394	3.4304	0.64559	5.31359	1.07e-07	4.32e-07
ENSG00000189377	56.8089	3.42469	0.478029	7.16419	7.82e-13	4.58e-12
ENSG00000165091	8.40974	3.41532	1.23162	2.77304	0.0055536	0.0130694
ENSG00000198682	727.604	3.41372	0.140358	24.3215	1.16e-130	7.87e-129
ENSG00000170689	109.433	3.41207	0.346805	9.83859	7.68e-23	7.37e-22
ENSG00000119638	463.769	3.40525	0.172412	19.7507	7.92e-87	3.17e-85
ENSG00000152154	16.6436	3.40525	0.882069	3.86052	0.000113146	0.000336405
ENSG00000150907	1575.22	3.40419	0.102356	33.2581	1.56e-242	2.64e-240
ENSG00000196458	183.377	3.40348	0.278466	12.2222	2.37e-34	3.35e-33
ENSG00000132669	297.607	3.40072	0.214414	15.8605	1.19e-56	2.92e-55
ENSG00000197380	11.1864	3.40061	1.06489	3.1934	0.00140609	0.00363109
ENSG00000146530	192.355	3.39824	0.264585	12.8437	9.34e-38	1.47e-36
ENSG00000198945	127.958	3.39434	0.31956	10.6219	2.36e-26	2.56e-25
ENSG00000128655	36.0168	3.38907	0.594885	5.69701	1.22e-08	5.31e-08
ENSG00000165410	1446.26	3.37299	0.103407	32.6185	2.24e-233	3.5e-231
ENSG00000262118	5.45949	3.36845	1.51267	2.22682	0.0259594	0.0533421
ENSG00000196620	21.6869	3.36251	0.806054	4.17157	3.03e-05	9.61e-05
ENSG00000122584	16.2869	3.35702	0.879567	3.81667	0.000135263	0.000398038
ENSG00000183775	8.16933	3.35302	1.24586	2.69133	0.00711686	0.0164301
ENSG00000198478	704.775	3.34674	0.143156	23.3783	7.1e-121	4.27e-119
ENSG00000059377	21.4963	3.33858	0.763102	4.37501	1.21e-05	4.03e-05
ENSG00000135205	50.6969	3.33772	0.501428	6.65643	2.81e-11	1.48e-10
ENSG00000105707	174.803	3.33531	0.274106	12.1679	4.61e-34	6.46e-33
ENSG00000056998	535.124	3.33386	0.158099	21.0871	1.05e-98	4.95e-97
ENSG00000125430	16.3583	3.33017	0.904128	3.68329	0.000230239	0.00065913
ENSG00000145349	834.908	3.32566	0.130423	25.499	2.02e-143	1.54e-141
ENSG00000118557	23.956	3.31761	0.722966	4.58889	4.46e-06	1.55e-05
ENSG00000178386	15.6927	3.3038	0.895507	3.68931	0.000224862	0.000644851
ENSG00000104043	26.3218	3.30319	0.688367	4.79858	1.6e-06	5.8e-06
ENSG00000152583	21.2334	3.29729	0.780027	4.22715	2.37e-05	7.62e-05
ENSG00000184305	62.3539	3.28133	0.447757	7.32839	2.33e-13	1.4e-12
ENSG00000130821	1163.74	3.27512	0.111935	29.2591	3.44e-188	3.73e-186
ENSG00000262209	38.5467	3.26772	0.566959	5.7636	8.23e-09	3.63e-08
ENSG00000196878	220.554	3.26615	0.245599	13.2987	2.35e-40	3.96e-39
ENSG00000136717	22.5204	3.25656	0.768944	4.23511	2.28e-05	7.36e-05
ENSG00000143036	109.131	3.2465	0.338817	9.58189	9.53e-22	8.73e-21
ENSG00000150540	731.864	3.2462	0.135881	23.89	3.89e-126	2.51e-124
ENSG00000126970	22.7601	3.24615	0.732097	4.43405	9.25e-06	3.12e-05
ENSG00000257446	10.0327	3.24367	1.1105	2.92092	0.00349	0.00847544
ENSG00000166833	1603.43	3.24324	0.0994759	32.6033	3.68e-233	5.66e-231
ENSG00000241399	85.6696	3.2327	0.384789	8.40123	4.42e-17	3.25e-16
ENSG00000183873	19.6889	3.22167	0.796884	4.04284	5.28e-05	0.000162954
ENSG00000240764	7.44148	3.21998	1.2744	2.52666	0.0115152	0.0255717
ENSG00000121236	57.5761	3.21883	0.463948	6.93791	3.98e-12	2.22e-11
ENSG00000144355	940.254	3.21642	0.122193	26.3224	1.06e-152	9.01e-151
ENSG00000136048	2609.23	3.21622	0.080749	39.8299	0	0
ENSG00000165895	96.2832	3.21085	0.361766	8.87549	6.96e-19	5.63e-18
ENSG00000120328	36.9616	3.20091	0.577332	5.54431	2.95e-08	1.24e-07
ENSG00000166268	29.4436	3.19487	0.640522	4.98792	6.1e-07	2.3e-06
ENSG00000145087	4.91718	3.19091	1.55511	2.05188	0.0401812	0.078874
ENSG00000182732	148.487	3.184	0.287125	11.0892	1.42e-28	1.66e-27
ENSG00000171124	36.7853	3.16939	0.595453	5.32266	1.02e-07	4.12e-07
ENSG00000120896	1013.61	3.16913	0.130338	24.3147	1.37e-130	9.24e-129
ENSG00000135443	9.75243	3.1666	1.11745	2.83378	0.00460011	0.0109513
ENSG00000169184	28.4363	3.15709	0.661318	4.77393	1.81e-06	6.51e-06
ENSG00000163072	105.684	3.15401	0.341653	9.23162	2.67e-20	2.29e-19
ENSG00000148468	74.4835	3.15128	0.407737	7.72871	1.09e-14	7.04e-14
ENSG00000163683	10311.6	3.15024	0.0639896	49.2305	0	0
ENSG00000165424	225.476	3.14827	0.239746	13.1317	2.17e-39	3.55e-38
ENSG00000232742	30.7472	3.14464	0.62393	5.04005	4.65e-07	1.77e-06
ENSG00000075651	456.666	3.1423	0.169544	18.5339	1.1e-76	3.82e-75
ENSG00000206561	44.5507	3.13825	0.526886	5.95623	2.58e-09	1.18e-08
ENSG00000143153	4562.04	3.12913	0.0667545	46.8752	0	0
ENSG00000104894	144.209	3.1277	0.294017	10.6378	1.99e-26	2.16e-25
ENSG00000103647	9.56919	3.12747	1.1247	2.78071	0.00542405	0.0127757
ENSG00000011201	51.7068	3.12628	0.480792	6.50236	7.91e-11	4.04e-10
ENSG00000168785	533.726	3.12337	0.155512	20.0844	1.01e-89	4.19e-88
ENSG00000225282	11.5045	3.12307	1.03529	3.0166	0.00255624	0.00634899
ENSG00000115423	18.75	3.1195	0.792456	3.9365	8.27e-05	0.000249368
ENSG00000133106	9.18076	3.1113	1.13822	2.73347	0.00626702	0.0146061
ENSG00000184731	644.871	3.10805	0.141991	21.8891	3.3e-106	1.73e-104
ENSG00000175592	85.6396	3.10037	0.375228	8.26263	1.42e-16	1.02e-15
ENSG00000105855	32.3574	3.09757	0.602817	5.1385	2.77e-07	1.07e-06
ENSG00000081665	122.219	3.09489	0.312955	9.88925	4.63e-23	4.49e-22
ENSG00000172602	876.301	3.08358	0.123224	25.0242	3.34e-138	2.43e-136
ENSG00000166173	522.133	3.08116	0.157629	19.547	4.38e-85	1.7e-83
ENSG00000183506	159.341	3.07829	0.274528	11.213	3.52e-29	4.23e-28
ENSG00000113448	126.937	3.07565	0.311992	9.85812	6.32e-23	6.08e-22
ENSG00000168243	45.5087	3.06757	0.521642	5.88061	4.09e-09	1.85e-08
ENSG00000173267	17.8095	3.06541	0.848101	3.61444	0.000301003	0.000851179
ENSG00000136826	2061.69	3.06169	0.0922241	33.1983	1.14e-241	1.91e-239
ENSG00000164056	178.227	3.05826	0.260418	11.7436	7.61e-32	9.91e-31
ENSG00000136327	139.647	3.05736	0.294123	10.3948	2.62e-25	2.74e-24
ENSG00000077063	11.1898	3.05204	1.01574	3.00474	0.0026581	0.0065883
ENSG00000128610	11.1898	3.05204	1.01574	3.00474	0.0026581	0.0065883
ENSG00000101049	6.65646	3.0518	1.31863	2.31438	0.0206467	0.0434249
ENSG00000138738	109.242	3.04571	0.331654	9.1834	4.18e-20	3.55e-19
ENSG00000163395	9.00951	3.03772	1.14285	2.65803	0.00785989	0.017991
ENSG00000115828	93.4816	3.03663	0.355415	8.5439	1.3e-17	9.83e-17
ENSG00000166002	121.965	3.03518	0.310872	9.76344	1.62e-22	1.53e-21
ENSG00000165801	230.049	3.0339	0.230197	13.1796	1.15e-39	1.9e-38
ENSG00000154143	11.3108	3.0335	1.03015	2.9447	0.00323266	0.00789954
ENSG00000128917	48.7599	3.03231	0.488205	6.21113	5.26e-10	2.53e-09
ENSG00000128203	92.5733	3.0286	0.357182	8.47917	2.27e-17	1.7e-16
ENSG00000158321	466.367	3.02029	0.163429	18.4807	2.95e-76	1.02e-74
ENSG00000106546	1831.39	3.01403	0.0932472	32.323	3.32e-229	4.79e-227
ENSG00000174599	95.0844	3.00768	0.366956	8.1963	2.48e-16	1.76e-15
ENSG00000197892	944.808	3.00581	0.117226	25.6411	5.31e-145	4.11e-143
ENSG00000162627	271.046	3.0056	0.220698	13.6186	3.1e-42	5.48e-41
ENSG00000132535	188.105	3.00156	0.257026	11.678	1.65e-31	2.13e-30
ENSG00000119771	119.29	2.99668	0.321102	9.33248	1.03e-20	9.03e-20
ENSG00000152818	2255.77	2.99572	0.0818767	36.5883	4.4e-293	1.06e-290
ENSG00000118298	152.847	2.99004	0.278876	10.7217	8.05e-27	8.88e-26
ENSG00000168135	32.2096	2.98618	0.604896	4.93668	7.95e-07	2.96e-06
ENSG00000135269	2700.17	2.98354	0.076699	38.8993	0	0
ENSG00000182247	956.709	2.98176	0.124171	24.0134	2.01e-127	1.31e-125
ENSG00000197594	765.762	2.97992	0.128865	23.1243	2.64e-118	1.56e-116
ENSG00000166831	76.9895	2.9783	0.387916	7.6777	1.62e-14	1.04e-13
ENSG00000108947	477.149	2.97814	0.161212	18.4735	3.38e-76	1.16e-74
ENSG00000145075	104.221	2.97233	0.336509	8.83284	1.02e-18	8.2e-18
ENSG00000176406	40.6521	2.97207	0.532428	5.58212	2.38e-08	1.01e-07
ENSG00000170498	10.6054	2.967	1.03124	2.87711	0.00401332	0.00964429
ENSG00000109466	725.316	2.96607	0.136748	21.69	2.55e-104	1.3e-102
ENSG00000196754	54.8407	2.95952	0.469046	6.30965	2.8e-10	1.37e-09
ENSG00000146090	25.4465	2.95611	0.682864	4.32899	1.5e-05	4.93e-05
ENSG00000169860	8.34623	2.95282	1.16687	2.53054	0.0113888	0.0253144
ENSG00000108846	4720.77	2.95086	0.0655336	45.0282	0	0
ENSG00000063127	93.4965	2.94667	0.370966	7.94325	1.97e-15	1.33e-14
ENSG00000251247	33.6095	2.94448	0.581956	5.05963	4.2e-07	1.6e-06
ENSG00000267041	164.946	2.94348	0.2708	10.8696	1.61e-27	1.81e-26
ENSG00000101850	79.6726	2.94311	0.379586	7.75346	8.94e-15	5.82e-14
ENSG00000132031	389.303	2.94174	0.178596	16.4715	5.88e-61	1.56e-59
ENSG00000121270	96.362	2.94035	0.349141	8.42165	3.71e-17	2.74e-16
ENSG00000146005	10.4071	2.91779	1.03729	2.81289	0.00490988	0.0116347
ENSG00000105088	311.432	2.91545	0.193936	15.033	4.46e-51	9.61e-50
ENSG00000103544	942.828	2.9118	0.116466	25.0012	5.93e-138	4.3e-136
ENSG00000141441	667.239	2.90519	0.13614	21.3397	4.86e-101	2.4e-99
ENSG00000139178	22.3926	2.89923	0.710414	4.08105	4.48e-05	0.000139709
ENSG00000198040	8.08847	2.89806	1.30187	2.22607	0.0260093	0.0534394
ENSG00000196338	30.4985	2.89697	0.613636	4.721	2.35e-06	8.4e-06
ENSG00000234115	6.00516	2.89168	1.38059	2.09452	0.0362136	0.0718461
ENSG00000252105	6.04727	2.89028	1.34941	2.14188	0.0322029	0.0647549
ENSG00000215441	12.3492	2.88987	0.958698	3.01437	0.00257513	0.00639441
ENSG00000113555	26.3439	2.87969	0.65093	4.42396	9.69e-06	3.26e-05
ENSG00000119547	375.894	2.87826	0.180029	15.9877	1.56e-57	3.88e-56
ENSG00000068078	409.506	2.87671	0.169953	16.9265	2.87e-64	8.06e-63
ENSG00000206044	6.02252	2.87369	1.36531	2.10478	0.0353106	0.0702944
ENSG00000021762	953.751	2.87159	0.116825	24.5801	2.06e-133	1.44e-131
ENSG00000162390	23.939	2.87083	0.687896	4.17334	3e-05	9.54e-05
ENSG00000118194	52.2942	2.86765	0.467496	6.13407	8.57e-10	4.06e-09
ENSG00000159885	27.6332	2.86642	0.657225	4.3614	1.29e-05	4.28e-05
ENSG00000254221	270.467	2.86604	0.206647	13.8693	9.73e-44	1.79e-42
ENSG00000148180	2941	2.865	0.0836523	34.2489	4.53e-257	8.7e-255
ENSG00000230756	33.3268	2.86487	0.648359	4.41865	9.93e-06	3.34e-05
ENSG00000079739	298.876	2.86431	0.204247	14.0238	1.12e-44	2.11e-43
ENSG00000130508	8663.41	2.86253	0.0586638	48.7955	0	0
ENSG00000163637	1015.73	2.86089	0.114133	25.0663	1.16e-138	8.55e-137
ENSG00000271424	5.91354	2.85989	1.36458	2.0958	0.0360999	0.0716535
ENSG00000178662	18.4108	2.85891	0.827146	3.45635	0.000547545	0.00150043
ENSG00000076067	207.635	2.8584	0.247685	11.5405	8.25e-31	1.04e-29
ENSG00000240891	16.0976	2.85808	0.834444	3.42512	0.000614518	0.00167245
ENSG00000111077	4852.91	2.85484	0.0749624	38.0836	0	0
ENSG00000183840	145.255	2.85345	0.279194	10.2203	1.61e-24	1.63e-23
ENSG00000185345	6.00746	2.85214	1.35273	2.10844	0.0349934	0.0697339
ENSG00000152952	7158.31	2.84503	0.0619929	45.8928	0	0
ENSGR0000182378	7.83836	2.84357	1.23102	2.30992	0.0208923	0.0438943
ENSG00000227295	7.92258	2.84306	1.17401	2.42166	0.0154496	0.0334423
ENSG00000221818	6.10138	2.8419	1.39225	2.04123	0.0412275	0.0806189
ENSG00000135373	5426.65	2.84141	0.0617033	46.0496	0	0
ENSG00000142871	1662.12	2.83994	0.0907936	31.279	9e-215	1.18e-212
ENSG00000106392	122.308	2.83976	0.307241	9.24279	2.4e-20	2.07e-19
ENSG00000232013	9.79559	2.83867	1.05638	2.68717	0.007206	0.0166127
ENSG00000136928	13.7963	2.83362	0.893754	3.17047	0.00152193	0.00391094
ENSG00000196141	2102.75	2.83308	0.0839826	33.7342	1.82e-249	3.3e-247
ENSG00000113749	14.051	2.8318	0.921748	3.0722	0.00212484	0.00534165
ENSG00000138640	68.6677	2.83102	0.402045	7.04156	1.9e-12	1.09e-11
ENSG00000135052	8758.86	2.82602	0.0531556	53.1651	0	0
ENSG00000125775	21.4417	2.82115	0.716686	3.93639	8.27e-05	0.000249449
ENSG00000143882	280.352	2.82022	0.202239	13.945	3.37e-44	6.29e-43
ENSG00000169744	5.91584	2.8193	1.35943	2.07389	0.0380897	0.0751593
ENSG00000256667	56.0606	2.81124	0.44968	6.25165	4.06e-10	1.97e-09
ENSG00000107957	243.262	2.80997	0.218819	12.8415	9.6e-38	1.51e-36
ENSG00000160255	131.925	2.80823	0.294631	9.53137	1.55e-21	1.41e-20
ENSG00000105329	2369.94	2.80455	0.0924979	30.3202	6.22e-202	7.47e-200
ENSG00000125257	507.221	2.79743	0.15227	18.3715	2.22e-75	7.51e-74
ENSG00000225603	7.44254	2.79624	1.2602	2.21889	0.0264944	0.0543531
ENSG00000237922	30.6057	2.78197	0.611608	4.54862	5.4e-06	1.87e-05
ENSG00000154874	5.62133	2.77894	1.39026	1.99887	0.0456227	0.0882351
ENSG00000145198	37.6274	2.77888	0.547625	5.07442	3.89e-07	1.49e-06
ENSG00000120278	71.6598	2.77776	0.396788	7.00063	2.55e-12	1.44e-11
ENSG00000153814	34.1187	2.77736	0.570409	4.86907	1.12e-06	4.12e-06
ENSG00000134871	5.66344	2.77691	1.38046	2.01159	0.0442632	0.0858063
ENSG00000115963	843.351	2.7719	0.120142	23.0718	8.9e-118	5.2e-116
ENSG00000121413	128.194	2.77172	0.294931	9.39787	5.57e-21	4.93e-20
ENSG00000131015	145.263	2.76486	0.280929	9.84187	7.43e-23	7.14e-22
ENSG00000163171	341.403	2.75441	0.188407	14.6194	2.11e-48	4.34e-47
ENSG00000184454	443.597	2.7434	0.164849	16.6419	3.46e-62	9.41e-61
ENSG00000253598	31.4239	2.74148	0.58745	4.66674	3.06e-06	1.08e-05
ENSG00000072694	9.46586	2.73999	1.08707	2.52053	0.0117177	0.0259865
ENSG00000102048	27.3142	2.72748	0.638872	4.2692	1.96e-05	6.37e-05
ENSG00000102935	24.1422	2.72718	0.673694	4.04811	5.16e-05	0.000159604
ENSG00000162745	12.8949	2.71934	0.911234	2.98423	0.00284289	0.0070156
ENSG00000254245	9.16165	2.7174	1.09513	2.48135	0.0130886	0.0287482
ENSG00000100473	60.2342	2.71468	0.423425	6.41123	1.44e-10	7.24e-10
ENSG00000145860	2260.15	2.70768	0.0794754	34.0694	2.09e-254	3.92e-252
ENSG00000182158	4561.76	2.7056	0.0625741	43.2383	0	0
ENSG00000111859	1065.74	2.69963	0.109111	24.7422	3.76e-135	2.69e-133
ENSG00000197872	21.5615	2.69466	0.704232	3.82638	0.000130044	0.000383833
ENSG00000256043	135.922	2.69335	0.287446	9.36995	7.26e-21	6.39e-20
ENSG00000142875	369.082	2.69255	0.175907	15.3067	6.9e-53	1.56e-51
ENSG00000105549	180.674	2.69253	0.258988	10.3963	2.58e-25	2.7e-24
ENSG00000183421	1545.25	2.6921	0.0945814	28.4633	3.33e-178	3.38e-176
ENSG00000148926	25.1783	2.68713	0.650519	4.13075	3.62e-05	0.000113746
ENSG00000050030	17.88	2.68683	0.771648	3.48195	0.000497786	0.00137299
ENSG00000170011	490.163	2.68552	0.152771	17.5788	3.58e-69	1.1e-67
ENSG00000162804	120.681	2.68148	0.310444	8.63756	5.74e-18	4.44e-17
ENSG00000147650	700.558	2.6761	0.130016	20.5828	3.91e-94	1.73e-92
ENSG00000141448	252.212	2.6674	0.209192	12.751	3.08e-37	4.78e-36
ENSG00000160209	9134.96	2.66425	0.0605422	44.0065	0	0
ENSG00000172201	354.116	2.65953	0.182003	14.6126	2.34e-48	4.8e-47
ENSG00000169862	398.221	2.65613	0.167945	15.8155	2.43e-56	5.93e-55
ENSG00000073792	1305.9	2.65564	0.0988998	26.8518	8.03e-159	7.05e-157
ENSG00000250305	124.829	2.6528	0.296896	8.93512	4.07e-19	3.33e-18
ENSG00000109472	2198.76	2.65057	0.081855	32.3813	5.04e-230	7.37e-228
ENSG00000182871	3888.5	2.64313	0.0790572	33.4331	4.53e-245	7.74e-243
ENSG00000170390	15.7148	2.64115	0.817559	3.23054	0.00123559	0.00321821
ENSG00000162836	1039.36	2.63783	0.108654	24.2772	3.41e-130	2.29e-128
ENSG00000196119	7.02118	2.63752	1.22651	2.15043	0.0315209	0.0635202
ENSG00000029153	535.599	2.63258	0.150932	17.4421	3.95e-68	1.19e-66
ENSG00000004660	292.359	2.62799	0.196007	13.4076	5.46e-41	9.31e-40
ENSG00000205795	10.623	2.62631	1.02517	2.56183	0.0104123	0.023366
ENSG00000100442	7530.29	2.61996	0.0587952	44.5608	0	0
ENSG00000228653	13.7576	2.61875	0.883492	2.96409	0.00303578	0.00745824
ENSG00000106031	8.6959	2.61697	1.09735	2.38481	0.0170881	0.0365804
ENSG00000124788	2319.06	2.61428	0.0780637	33.489	6.96e-246	1.22e-243
ENSG00000152433	49.6643	2.61387	0.46918	5.57114	2.53e-08	1.07e-07
ENSG00000166147	16.9365	2.5993	0.788077	3.29828	0.000972797	0.00256921
ENSG00000165795	386.415	2.59156	0.169591	15.2812	1.02e-52	2.29e-51
ENSG00000112182	48.0529	2.59129	0.482481	5.37077	7.84e-08	3.18e-07
ENSG00000088992	13.5743	2.58999	0.874292	2.96238	0.00305266	0.00749628
ENSG00000125354	33.9542	2.58766	0.561196	4.61097	4.01e-06	1.4e-05
ENSG00000101188	42.6794	2.58455	0.508748	5.08021	3.77e-07	1.44e-06
ENSG00000162458	104.584	2.5844	0.330153	7.82787	4.96e-15	3.27e-14
ENSG00000113763	286.221	2.57668	0.197736	13.0309	8.16e-39	1.32e-37
ENSG00000133083	105.526	2.57477	0.317771	8.10259	5.38e-16	3.74e-15
ENSG00000186973	10.3482	2.56898	1.06164	2.41982	0.0155282	0.0335786
ENSG00000099617	36.8927	2.56769	0.538808	4.76551	1.88e-06	6.78e-06
ENSG00000170442	414.893	2.56616	0.168628	15.2178	2.69e-52	6e-51
ENSG00000123983	5627.42	2.56086	0.0590756	43.3488	0	0
ENSG00000069188	269.448	2.55929	0.201522	12.6998	5.93e-37	9.11e-36
ENSG00000104490	6.56819	2.55824	1.25728	2.03474	0.0418771	0.0817554
ENSG00000148677	76.1081	2.55005	0.370834	6.87653	6.13e-12	3.38e-11
ENSG00000073150	377.377	2.54793	0.178142	14.3028	2.1e-46	4.09e-45
ENSG00000205213	1549.7	2.54252	0.0937024	27.134	3.91e-162	3.52e-160
ENSG00000204118	43.0592	2.53165	0.505264	5.01055	5.43e-07	2.05e-06
ENSG00000182240	1125.08	2.52982	0.10611	23.8416	1.24e-125	7.92e-124
ENSG00000188322	1074.1	2.52947	0.110582	22.8742	8.39e-116	4.81e-114
ENSG00000139626	29.7942	2.52655	0.625933	4.03646	5.43e-05	0.000167164
ENSG00000138669	42.5521	2.52507	0.495559	5.0954	3.48e-07	1.34e-06
ENSG00000135363	124.418	2.52398	0.302578	8.34158	7.33e-17	5.33e-16
ENSG00000186462	65.1403	2.52176	0.399044	6.3195	2.62e-10	1.29e-09
ENSG00000165188	7.9905	2.52133	1.14645	2.19924	0.0278605	0.0569115
ENSG00000162975	275.852	2.5193	0.198278	12.7059	5.48e-37	8.44e-36
ENSG00000213901	71.3548	2.51901	0.388124	6.49023	8.57e-11	4.36e-10
ENSG00000183929	9.59835	2.51331	1.04084	2.41469	0.0157485	0.0340105
ENSG00000120093	14.6398	2.51177	0.837214	3.00015	0.00269845	0.00668214
ENSG00000031081	43.6822	2.5083	0.486793	5.15269	2.57e-07	9.98e-07
ENSG00000164211	760.182	2.50756	0.12807	19.5797	2.31e-85	9.02e-84
ENSG00000062370	97.9846	2.50693	0.330627	7.58236	3.39e-14	2.14e-13
ENSG00000234602	95.3518	2.50562	0.331195	7.56538	3.87e-14	2.43e-13
ENSG00000267756	9.82829	2.5054	1.0331	2.42513	0.0153029	0.0331514
ENSG00000119729	1502.48	2.49862	0.0932984	26.7809	5.39e-158	4.71e-156
ENSG00000078401	1074.69	2.49122	0.107909	23.0863	6.35e-118	3.73e-116
ENSG00000229083	17.3906	2.48752	0.772379	3.2206	0.00127921	0.00332219
ENSG00000135643	377.829	2.48698	0.170578	14.5797	3.78e-48	7.73e-47
ENSG00000137648	214.694	2.48574	0.227845	10.9098	1.03e-27	1.18e-26
ENSG00000102313	28.3811	2.48013	0.637703	3.88915	0.000100595	0.000300332
ENSG00000153395	6898.05	2.4774	0.0576646	42.9622	0	0
ENSG00000053524	28.3068	2.47023	0.606142	4.07533	4.59e-05	0.000142852
ENSG00000150977	208.419	2.47009	0.225574	10.9503	6.63e-28	7.57e-27
ENSG00000232387	11.159	2.46779	0.964693	2.55811	0.0105242	0.0235901
ENSG00000151692	391.571	2.46653	0.167885	14.6918	7.28e-49	1.5e-47
ENSG00000101230	15.5152	2.46487	0.825669	2.9853	0.00283303	0.00699206
ENSG00000188766	14.0531	2.46018	0.85674	2.87156	0.00408453	0.00980306
ENSG00000136158	135.613	2.44634	0.276293	8.85414	8.43e-19	6.79e-18
ENSG00000141527	781.008	2.44584	0.12394	19.7341	1.1e-86	4.38e-85
ENSG00000170271	256.725	2.44396	0.203988	11.9809	4.47e-33	6.07e-32
ENSG00000253425	7.72534	2.44376	1.13962	2.14437	0.032003	0.064383
ENSG00000102554	1174.78	2.44081	0.101005	24.1652	5.17e-129	3.41e-127
ENSG00000130234	16.6086	2.43804	0.840812	2.89962	0.0037361	0.00901913
ENSG00000128791	891.944	2.43534	0.115898	21.0128	5.01e-98	2.35e-96
ENSG00000158856	479.644	2.43523	0.158342	15.3796	2.24e-53	5.12e-52
ENSG00000168172	944.042	2.43313	0.118736	20.492	2.54e-93	1.11e-91
ENSG00000239093	10.585	2.43228	1.00794	2.41311	0.0158171	0.0341313
ENSG00000121039	675.692	2.42825	0.129297	18.7804	1.09e-78	3.9e-77
ENSG00000102524	9.24157	2.42737	1.04099	2.3318	0.0197114	0.0416186
ENSG00000252925	15.5469	2.42693	0.810608	2.99397	0.00275377	0.00681182
ENSG00000107719	35.571	2.42642	0.539753	4.49543	6.94e-06	2.38e-05
ENSG00000035115	3818.67	2.4264	0.0652787	37.1699	2.09e-302	5.49e-300
ENSG00000176533	56.4391	2.41987	0.43035	5.62303	1.88e-08	8.04e-08
ENSG00000229091	7.64341	2.41499	1.19161	2.02666	0.0426969	0.0831371
ENSG00000131389	6465.48	2.41177	0.0564624	42.7147	0	0
ENSG00000132334	133.37	2.41066	0.283727	8.49641	1.96e-17	1.47e-16
ENSG00000152766	45.9256	2.40912	0.478032	5.03968	4.66e-07	1.77e-06
ENSG00000006740	261.394	2.40782	0.201362	11.9577	5.92e-33	7.99e-32
ENSG00000163009	19.747	2.40729	0.71444	3.36948	0.0007531	0.00202148
ENSG00000165434	328.239	2.40552	0.185124	12.9941	1.32e-38	2.13e-37
ENSG00000174808	409.778	2.40271	0.162567	14.7798	1.98e-49	4.14e-48
ENSG00000119698	13.6445	2.40258	0.855884	2.80713	0.00499846	0.0118289
ENSG00000088340	663.141	2.39994	0.130289	18.4201	9.06e-76	3.09e-74
ENSG00000055732	121.056	2.39727	0.290958	8.23924	1.73e-16	1.24e-15
ENSG00000149527	39.2114	2.39421	0.522903	4.57868	4.68e-06	1.63e-05
ENSG00000109787	2262.8	2.38927	0.0827695	28.8666	3.14e-183	3.28e-181
ENSG00000132122	90.4419	2.38189	0.342655	6.95128	3.62e-12	2.02e-11
ENSG00000110975	59.8611	2.38136	0.413431	5.76	8.41e-09	3.71e-08
ENSG00000152256	678.555	2.37927	0.131957	18.0307	1.12e-72	3.62e-71
ENSG00000151612	805.1	2.37854	0.124004	19.1812	5.32e-82	1.98e-80
ENSG00000105854	2831.48	2.37664	0.073147	32.4913	1.41e-231	2.08e-229
ENSG00000146205	47.7154	2.37662	0.4602	5.16433	2.41e-07	9.4e-07
ENSG00000116285	7563.87	2.37455	0.0554936	42.7896	0	0
ENSG00000135046	61.1519	2.37395	0.40824	5.81508	6.06e-09	2.7e-08
ENSG00000169989	28.142	2.36987	0.602077	3.93617	8.28e-05	0.000249645
ENSG00000180263	901.133	2.36807	0.112936	20.9683	1.28e-97	5.97e-96
ENSG00000135596	530.859	2.36575	0.142951	16.5495	1.62e-61	4.33e-60
ENSG00000222365	8.83068	2.36395	1.06216	2.22561	0.0260401	0.053494
ENSG00000156804	295.092	2.3631	0.197276	11.9786	4.6e-33	6.23e-32
ENSG00000135502	14.6657	2.3599	0.840486	2.80778	0.00498846	0.0118066
ENSG00000086619	91.4115	2.34443	0.335335	6.9913	2.72e-12	1.53e-11
ENSG00000124140	314.972	2.34343	0.182612	12.8329	1.07e-37	1.69e-36
ENSG00000168772	169.641	2.33814	0.245609	9.51975	1.74e-21	1.58e-20
ENSG00000106688	38.1194	2.33722	0.513203	4.55418	5.26e-06	1.82e-05
ENSG00000215277	7.32644	2.33693	1.1756	1.98787	0.0468263	0.0903435
ENSG00000187372	166.136	2.33677	0.249345	9.37166	7.14e-21	6.29e-20
ENSG00000157021	42.2105	2.33539	0.488897	4.77686	1.78e-06	6.42e-06
ENSG00000147576	54.0608	2.33422	0.433462	5.38506	7.24e-08	2.95e-07
ENSG00000173320	58.2956	2.33036	0.414978	5.61564	1.96e-08	8.38e-08
ENSG00000133962	27.3623	2.33026	0.641569	3.63213	0.000281095	0.000797609
ENSG00000181358	8.6722	2.32958	1.07113	2.17489	0.0296383	0.0601431
ENSG00000182308	11.4921	2.32843	0.946011	2.46132	0.0138428	0.030235
ENSG00000132356	3164.44	2.32785	0.0780562	29.8227	1.99e-195	2.31e-193
ENSG00000118985	542.119	2.32779	0.152613	15.2529	1.58e-52	3.54e-51
ENSG00000166068	533.945	2.32694	0.148925	15.6249	4.93e-55	1.16e-53
ENSG00000215513	181.741	2.32535	0.2468	9.42198	4.43e-21	3.94e-20
ENSG00000081377	416.516	2.32024	0.159418	14.5544	5.47e-48	1.11e-46
ENSG00000180891	1424.89	2.31808	0.0932632	24.8552	2.27e-136	1.63e-134
ENSG00000164125	291.686	2.31547	0.195777	11.8271	2.83e-32	3.73e-31
ENSG00000111254	11.3583	2.31144	0.945639	2.44432	0.0145125	0.0315759
ENSG00000166426	979.073	2.30782	0.110413	20.9018	5.16e-97	2.39e-95
ENSG00000168487	722.037	2.30196	0.132398	17.3867	1.04e-67	3.12e-66
ENSG00000232549	11.4372	2.30004	0.928217	2.47792	0.0132152	0.0289995
ENSG00000267508	43.9832	2.29981	0.482816	4.76331	1.9e-06	6.85e-06
ENSG00000184702	255.589	2.29795	0.20123	11.4195	3.34e-30	4.15e-29
ENSG00000120658	7.11615	2.2965	1.17045	1.96205	0.0497562	0.0954315
ENSG00000106123	106.379	2.29596	0.316669	7.25034	4.16e-13	2.47e-12
ENSG00000151320	232.959	2.29217	0.211507	10.8373	2.29e-27	2.57e-26
ENSG00000141504	150.491	2.29106	0.268867	8.52116	1.58e-17	1.19e-16
ENSG00000247596	380.498	2.28775	0.166298	13.7569	4.63e-43	8.37e-42
ENSG00000152763	46.5252	2.28071	0.462334	4.93303	8.1e-07	3.02e-06
ENSG00000203815	41.1131	2.27914	0.491117	4.64073	3.47e-06	1.22e-05
ENSG00000145451	107.673	2.27777	0.306272	7.43707	1.03e-13	6.36e-13
ENSG00000168386	9.73543	2.27479	1.01023	2.25174	0.0243385	0.0503141
ENSG00000079337	189.93	2.27074	0.247955	9.15784	5.29e-20	4.48e-19
ENSG00000218586	18.1522	2.26696	0.749134	3.02611	0.00247721	0.00616622
ENSG00000130164	1650.9	2.26568	0.0922803	24.5522	4.1e-133	2.87e-131
ENSG00000134317	2354.44	2.26501	0.0780865	29.0064	5.47e-185	5.79e-183
ENSG00000171848	6256.5	2.26395	0.0617332	36.6732	1.96e-294	4.84e-292
ENSG00000163644	179.906	2.26285	0.264647	8.55046	1.23e-17	9.3e-17
ENSG00000139344	25.3495	2.26091	0.637491	3.54658	0.000390269	0.00109
ENSG00000117643	44.0391	2.25997	0.505329	4.47228	7.74e-06	2.64e-05
ENSG00000008323	79.8085	2.25792	0.353477	6.38774	1.68e-10	8.41e-10
ENSG00000177675	103.551	2.25452	0.32945	6.84329	7.74e-12	4.23e-11
ENSG00000108352	2617.5	2.25354	0.0808248	27.8818	4.44e-171	4.32e-169
ENSG00000198729	24.8153	2.25252	0.644966	3.49247	0.00047858	0.00132376
ENSG00000138735	353.255	2.25039	0.175896	12.7939	1.77e-37	2.77e-36
ENSG00000122497	811.275	2.24876	0.121422	18.5202	1.42e-76	4.91e-75
ENSG00000108821	1424.61	2.24771	0.102761	21.8732	4.68e-106	2.45e-104
ENSG00000100003	119.883	2.24713	0.294729	7.62438	2.45e-14	1.56e-13
ENSG00000143870	9547.28	2.24577	0.0515324	43.5797	0	0
ENSG00000213250	9.97736	2.24498	1.03582	2.16735	0.030208	0.0611437
ENSG00000105419	275.761	2.24446	0.203362	11.0368	2.54e-28	2.96e-27
ENSG00000139112	226.623	2.23785	0.211693	10.5712	4.05e-26	4.36e-25
ENSG00000169635	214.293	2.23639	0.230344	9.70889	2.76e-22	2.59e-21
ENSG00000163393	167.849	2.23627	0.245745	9.09997	9.04e-20	7.58e-19
ENSG00000151623	52.4523	2.23452	0.436251	5.12209	3.02e-07	1.17e-06
ENSG00000154035	228.985	2.23274	0.214061	10.4304	1.8e-25	1.9e-24
ENSG00000087589	10.9865	2.22856	0.939083	2.37312	0.0176384	0.037635
ENSG00000047365	857.788	2.22775	0.125651	17.7296	2.48e-70	7.74e-69
ENSG00000073910	97.1129	2.2271	0.320855	6.94114	3.89e-12	2.17e-11
ENSG00000102760	8.06072	2.22614	1.12238	1.98341	0.0473215	0.0912171
ENSG00000198580	8.06072	2.22614	1.12238	1.98341	0.0473215	0.0912171
ENSG00000145555	1866.35	2.22472	0.0823048	27.0303	6.52e-161	5.79e-159
ENSG00000114166	301.473	2.21953	0.184585	12.0244	2.65e-33	3.62e-32
ENSG00000091436	1461.2	2.21732	0.0912228	24.3066	1.67e-130	1.12e-128
ENSG00000091844	364.303	2.21719	0.17384	12.7542	2.95e-37	4.59e-36
ENSG00000168077	582.25	2.21713	0.14137	15.6832	1.97e-55	4.72e-54
ENSG00000115594	28.6902	2.21686	0.587048	3.77629	0.000159183	0.000464298
ENSG00000181649	730.505	2.21381	0.129661	17.0739	2.32e-65	6.65e-64
ENSG00000106089	645.987	2.20917	0.133666	16.5276	2.32e-61	6.2e-60
ENSG00000135472	13.702	2.20827	0.84542	2.61204	0.0090004	0.0204277
ENSG00000057252	472.596	2.20775	0.153149	14.4157	4.12e-47	8.19e-46
ENSG00000120327	155.726	2.20696	0.253349	8.71117	3.01e-18	2.35e-17
ENSG00000162878	25.715	2.20597	0.618788	3.56499	0.000363865	0.00102049
ENSG00000137266	664.201	2.20526	0.130012	16.9619	1.57e-64	4.44e-63
ENSG00000112561	111.624	2.19699	0.30384	7.23075	4.8e-13	2.84e-12
ENSG00000043355	216.674	2.19689	0.217159	10.1165	4.67e-24	4.65e-23
ENSG00000206559	21.4855	2.19631	0.681774	3.22146	0.00127541	0.0033143
ENSG00000241852	117.727	2.19341	0.295968	7.41098	1.25e-13	7.69e-13
ENSG00000167680	397.005	2.192	0.175535	12.4875	8.73e-36	1.3e-34
ENSG00000151332	2796.41	2.18849	0.0838883	26.0881	4.97e-150	4.07e-148
ENSG00000165138	1787.22	2.18599	0.0848201	25.7721	1.82e-146	1.44e-144
ENSG00000143466	232.322	2.18173	0.21298	10.2439	1.26e-24	1.29e-23
ENSG00000126562	10.7882	2.18068	0.950718	2.29373	0.0218063	0.0456007
ENSG00000239264	105.528	2.17852	0.306117	7.11663	1.11e-12	6.42e-12
ENSG00000182372	1472.32	2.17618	0.0942115	23.0989	4.75e-118	2.8e-116
ENSG00000060656	3001.81	2.17591	0.0791943	27.4756	3.44e-166	3.18e-164
ENSG00000164929	9.44781	2.17492	1.03227	2.10693	0.0351233	0.0699734
ENSG00000138294	493.815	2.17008	0.150526	14.4167	4.06e-47	8.08e-46
ENSG00000179750	125.481	2.16944	0.292434	7.41857	1.18e-13	7.29e-13
ENSG00000154263	14.6218	2.16806	0.816535	2.6552	0.00792611	0.018131
ENSG00000143797	1057.09	2.1677	0.103905	20.8624	1.18e-96	5.39e-95
ENSG00000158296	21.2204	2.16714	0.679543	3.18911	0.00142711	0.00368183
ENSG00000197183	619.945	2.16534	0.130836	16.55	1.6e-61	4.29e-60
ENSG00000170412	533.969	2.16492	0.147357	14.6917	7.29e-49	1.5e-47
ENSG00000089356	4010.36	2.15711	0.0693962	31.084	3.97e-212	5.08e-210
ENSG00000253731	35.5844	2.15701	0.52188	4.13314	3.58e-05	0.000112633
ENSG00000007516	500.741	2.15586	0.15212	14.1721	1.36e-45	2.63e-44
ENSG00000120925	669.105	2.1552	0.12691	16.9821	1.11e-64	3.15e-63
ENSG00000142279	115.837	2.14916	0.293132	7.33172	2.27e-13	1.37e-12
ENSG00000140545	436.858	2.14696	0.155321	13.8227	1.86e-43	3.39e-42
ENSG00000150672	34.0434	2.14581	0.532081	4.03287	5.51e-05	0.000169513
ENSG00000168268	3410.7	2.14381	0.0692596	30.9533	2.3e-210	2.92e-208
ENSG00000122035	40.654	2.14372	0.489066	4.3833	1.17e-05	3.89e-05
ENSG00000187730	18.5041	2.14358	0.734399	2.91883	0.00351351	0.00852963
ENSG00000100478	793.716	2.14286	0.11956	17.9229	7.81e-72	2.5e-70
ENSG00000174791	47.9305	2.14159	0.458887	4.66691	3.06e-06	1.08e-05
ENSG00000158555	200.917	2.14136	0.231928	9.23287	2.63e-20	2.26e-19
ENSG00000176595	287.065	2.1411	0.19694	10.8719	1.57e-27	1.77e-26
ENSG00000116396	34.9706	2.13804	0.533024	4.01115	6.04e-05	0.000185047
ENSG00000165626	312.628	2.13687	0.179913	11.8772	1.55e-32	2.07e-31
ENSG00000226525	191.219	2.12915	0.228981	9.29837	1.43e-20	1.24e-19
ENSG00000131171	1049.94	2.12908	0.112129	18.9877	2.15e-80	7.87e-79
ENSG00000171236	142.35	2.12613	0.262757	8.09161	5.89e-16	4.08e-15
ENSG00000124302	156.682	2.12534	0.251184	8.46126	2.64e-17	1.97e-16
ENSG00000114698	14.3566	2.12518	0.821652	2.58648	0.00969629	0.0218712
ENSG00000183760	48.5948	2.11875	0.455009	4.65651	3.22e-06	1.14e-05
ENSG00000160190	2226.44	2.1185	0.0798338	26.5364	3.69e-155	3.18e-153
ENSG00000114279	99.5707	2.11693	0.314787	6.72496	1.76e-11	9.38e-11
ENSG00000116678	276.131	2.11561	0.198499	10.658	1.6e-26	1.75e-25
ENSG00000187870	10.2165	2.11543	0.966811	2.18805	0.0286662	0.0583467
ENSG00000138678	199.03	2.11434	0.225778	9.3647	7.63e-21	6.7e-20
ENSG00000179088	25.1421	2.1105	0.65893	3.20291	0.00136045	0.00351955
ENSG00000145362	25.9278	2.10864	0.628181	3.35675	0.000788652	0.00210981
ENSG00000257674	17.3713	2.09985	0.804416	2.6104	0.00904372	0.0205152
ENSG00000158055	67.2036	2.09957	0.400617	5.24083	1.6e-07	6.34e-07
ENSG00000113070	44.3279	2.0962	0.468913	4.47033	7.81e-06	2.66e-05
ENSG00000175505	203.856	2.09355	0.223461	9.36874	7.34e-21	6.46e-20
ENSG00000225526	109.19	2.09346	0.299113	6.99888	2.58e-12	1.46e-11
ENSG00000091490	2113.81	2.09279	0.0800984	26.1277	1.76e-150	1.45e-148
ENSG00000197747	16559.3	2.09231	0.0492966	42.4433	0	0
ENSG00000116254	113.168	2.08998	0.293273	7.1264	1.03e-12	5.99e-12
ENSG00000055118	127.187	2.08741	0.281716	7.40963	1.27e-13	7.76e-13
ENSG00000187984	19.9283	2.08679	0.715144	2.918	0.00352284	0.00854747
ENSG00000197712	444.019	2.0857	0.155617	13.4028	5.83e-41	9.92e-40
ENSG00000227440	20.21	2.08415	0.686297	3.03681	0.00239095	0.00596531
ENSG00000196963	492.227	2.08237	0.145334	14.3281	1.46e-46	2.86e-45
ENSG00000067167	4897.8	2.08195	0.0657108	31.6835	2.62e-220	3.52e-218
ENSG00000169330	29.2439	2.08133	0.57536	3.61744	0.000297534	0.000841812
ENSG00000168461	2013.85	2.08082	0.0799979	26.011	3.72e-149	3.02e-147
ENSG00000146674	66.7034	2.08047	0.385164	5.40151	6.61e-08	2.7e-07
ENSG00000175662	1787.87	2.07521	0.0870236	23.8465	1.1e-125	7.09e-124
ENSG00000130649	10.179	2.07261	0.970115	2.13645	0.0326424	0.0655714
ENSG00000140564	5381.42	2.0695	0.0629176	32.8923	2.83e-237	4.58e-235
ENSG00000186832	32.6763	2.0693	0.540253	3.83024	0.00012802	0.000378121
ENSG00000245680	146.028	2.06852	0.26169	7.90447	2.69e-15	1.81e-14
ENSG00000177731	6535.34	2.06755	0.0648642	31.8751	5.91e-223	8.14e-221
ENSG00000112852	600.788	2.06657	0.132227	15.6289	4.63e-55	1.09e-53
ENSG00000167281	9.91462	2.06478	1.01849	2.0273	0.0426315	0.0830322
ENSG00000082929	18.9334	2.06364	0.714103	2.88984	0.00385438	0.00929006
ENSG00000115221	428.715	2.05929	0.158011	13.0325	7.99e-39	1.29e-37
ENSG00000104763	3774.76	2.05771	0.064617	31.8447	1.56e-222	2.13e-220
ENSG00000180354	848.507	2.05624	0.113639	18.0945	3.52e-73	1.15e-71
ENSG00000139537	44.8804	2.05541	0.462352	4.44556	8.77e-06	2.97e-05
ENSG00000120318	18.7479	2.05289	0.711906	2.88366	0.00393089	0.00945751
ENSG00000111087	60.7293	2.05054	0.413066	4.9642	6.9e-07	2.59e-06
ENSG00000152669	233.177	2.04975	0.211454	9.6936	3.21e-22	3e-21
ENSG00000183186	248.285	2.04564	0.20102	10.1763	2.53e-24	2.55e-23
ENSG00000076685	1236.26	2.04491	0.0969188	21.0992	8.09e-99	3.85e-97
ENSG00000188659	19.769	2.04403	0.699716	2.92122	0.0034866	0.00846908
ENSG00000104611	1409.68	2.04349	0.0937447	21.7984	2.4e-105	1.24e-103
ENSG00000139263	529.237	2.03968	0.141125	14.453	2.4e-47	4.82e-46
ENSG00000151690	2165.92	2.0392	0.0788131	25.8739	1.31e-147	1.05e-145
ENSGR0000169093	78.9443	2.03806	0.419302	4.8606	1.17e-06	4.3e-06
ENSG00000163386	2146.42	2.0359	0.07769	26.2055	2.3e-151	1.92e-149
ENSG00000185022	171.135	2.035	0.238264	8.54095	1.33e-17	1.01e-16
ENSG00000030419	370.242	2.03148	0.166625	12.192	3.43e-34	4.82e-33
ENSG00000143375	7192.25	2.02875	0.0542514	37.3955	4.63e-306	1.23e-303
ENSG00000171853	1362.71	2.02287	0.0965534	20.9508	1.85e-97	8.62e-96
ENSG00000179476	490.786	2.02233	0.14514	13.9336	3.96e-44	7.36e-43
ENSG00000141526	714.19	2.0223	0.121593	16.6317	4.11e-62	1.11e-60
ENSG00000059728	996.631	2.02186	0.107021	18.8921	1.32e-79	4.78e-78
ENSG00000182718	15837.6	2.01689	0.0502622	40.1274	0	0
ENSG00000197888	13.2922	2.01606	0.843458	2.39023	0.0168377	0.0360911
ENSG00000021826	298.818	2.0143	0.183379	10.9844	4.54e-28	5.23e-27
ENSG00000100934	9435.84	2.01339	0.0536673	37.5162	5.02e-308	1.37e-305
ENSG00000246575	52.0829	2.01263	0.435418	4.62231	3.79e-06	1.33e-05
ENSG00000152439	85.1088	2.01258	0.336995	5.97213	2.34e-09	1.08e-08
ENSG00000136378	22.7635	2.01113	0.659905	3.04761	0.00230673	0.0057699
ENSG00000198108	35.0886	2.0102	0.521188	3.85696	0.000114807	0.000340873
ENSG00000137393	612.547	2.00834	0.130111	15.4356	9.44e-54	2.17e-52
ENSG00000212710	40.0515	2.0077	0.485748	4.13321	3.58e-05	0.000112615
ENSG00000135916	690.075	2.00764	0.123576	16.2462	2.38e-59	6.13e-58
ENSG00000129295	65.3569	2.00725	0.382355	5.24972	1.52e-07	6.04e-07
ENSG00000142694	55.4701	2.00479	0.416032	4.81884	1.44e-06	5.26e-06
ENSG00000186480	1861.77	2.00112	0.0824476	24.2714	3.93e-130	2.62e-128
ENSG00000164932	125.542	2.00082	0.292868	6.83182	8.38e-12	4.58e-11
ENSG00000213240	630.608	2.00031	0.128488	15.5681	1.2e-54	2.82e-53
ENSG00000146013	83.9977	2.00016	0.342942	5.83235	5.47e-09	2.44e-08
ENSG00000127863	14.5703	1.99727	0.806016	2.47795	0.013214	0.0289995
ENSG00000169403	102.764	1.99588	0.30876	6.46418	1.02e-10	5.16e-10
ENSG00000125733	1147.02	1.99337	0.0988734	20.1608	2.16e-90	9.05e-89
ENSG00000122707	14.3156	1.99156	0.814962	2.44375	0.0145355	0.0316195
ENSG00000116260	5977.6	1.99048	0.0574956	34.6196	1.28e-262	2.53e-260
ENSG00000172780	45.016	1.98755	0.488461	4.069	4.72e-05	0.0001466
ENSG00000140284	1863.92	1.98752	0.0819739	24.2458	7.33e-130	4.86e-128
ENSG00000253305	10.9523	1.98658	0.936109	2.12217	0.0338235	0.0677289
ENSG00000196792	3322.02	1.98547	0.0769656	25.7969	9.61e-147	7.63e-145
ENSG00000147459	2113.18	1.98454	0.0775489	25.5909	1.93e-144	1.49e-142
ENSG00000163536	43.3323	1.9819	0.478439	4.14242	3.44e-05	0.000108375
ENSG00000100941	20167.5	1.97413	0.0487153	40.5238	0	0
ENSG00000051108	3149.57	1.96959	0.0674682	29.1928	2.39e-187	2.58e-185
ENSG00000168522	1079.99	1.96362	0.102335	19.1882	4.64e-82	1.73e-80
ENSG00000130066	849.524	1.96305	0.113222	17.338	2.43e-67	7.22e-66
ENSG00000106686	80.8575	1.9605	0.361892	5.41737	6.05e-08	2.48e-07
ENSG00000131981	3776.75	1.95933	0.0652264	30.0389	3.05e-198	3.58e-196
ENSG00000106789	527.885	1.95591	0.138805	14.0911	4.31e-45	8.23e-44
ENSG00000243232	44.8593	1.95213	0.459373	4.24955	2.14e-05	6.92e-05
ENSG00000149294	40.9573	1.9514	0.481067	4.05639	4.98e-05	0.000154361
ENSG00000179222	2771.36	1.95061	0.0705902	27.6328	4.49e-168	4.24e-166
ENSG00000108551	27.1218	1.94884	0.58897	3.30889	0.000936653	0.00247953
ENSG00000147689	59.8446	1.94752	0.396915	4.90665	9.26e-07	3.43e-06
ENSG00000259516	31.4891	1.94527	0.562272	3.45966	0.000540855	0.0014838
ENSG00000138448	4255.79	1.94142	0.0679937	28.5529	2.59e-179	2.66e-177
ENSG00000250565	437.892	1.94088	0.155599	12.4736	1.04e-35	1.54e-34
ENSG00000156535	237.366	1.94058	0.202209	9.59691	8.24e-22	7.57e-21
ENSG00000158186	75.0266	1.93803	0.360463	5.3765	7.59e-08	3.09e-07
ENSG00000176399	375.495	1.9343	0.17048	11.3462	7.74e-30	9.5e-29
ENSG00000260903	18.0486	1.93393	0.804476	2.40397	0.0162183	0.034899
ENSG00000143727	3970.99	1.93381	0.0656623	29.4508	1.23e-190	1.36e-188
ENSG00000090661	784.049	1.933	0.11827	16.3439	4.81e-60	1.25e-58
ENSG00000002834	6651.41	1.93251	0.0577593	33.458	1.97e-245	3.42e-243
ENSG00000215105	222.524	1.93067	0.21333	9.05018	1.43e-19	1.19e-18
ENSG00000185033	3578.62	1.92768	0.0710138	27.1451	2.89e-162	2.61e-160
ENSG00000168398	797.553	1.92621	0.123984	15.536	1.98e-54	4.64e-53
ENSG00000089505	23.0636	1.92354	0.63926	3.00901	0.00262096	0.00650074
ENSG00000137575	1460.8	1.92296	0.0910022	21.1309	4.13e-99	1.99e-97
ENSG00000015475	1829.89	1.9168	0.0815647	23.5004	4.04e-122	2.48e-120
ENSG00000126705	719.18	1.91508	0.127361	15.0367	4.22e-51	9.1e-50
ENSG00000069667	66.7	1.91461	0.375416	5.09997	3.4e-07	1.3e-06
ENSG00000105767	257.401	1.91387	0.211596	9.04495	1.5e-19	1.24e-18
ENSG00000254995	42.504	1.9134	0.46972	4.0735	4.63e-05	0.000143937
ENSG00000196511	152.94	1.91331	0.250863	7.62689	2.4e-14	1.53e-13
ENSG00000187244	3563.71	1.90725	0.0771987	24.7057	9.3e-135	6.62e-133
ENSG00000119737	21.1069	1.90654	0.714468	2.66847	0.00761966	0.0174839
ENSG00000154310	201.167	1.90445	0.219543	8.67463	4.15e-18	3.22e-17
ENSG00000251633	16.8864	1.9038	0.761315	2.50067	0.0123958	0.0273465
ENSG00000183742	315.899	1.90346	0.18172	10.4747	1.13e-25	1.2e-24
ENSG00000211451	106.921	1.8998	0.302974	6.27051	3.6e-10	1.75e-09
ENSG00000026025	96.5649	1.89895	0.317791	5.97546	2.29e-09	1.06e-08
ENSG00000234589	21.4114	1.8983	0.671097	2.82865	0.00467447	0.0111123
ENSG00000196924	51541.9	1.89747	0.0573745	33.0716	7.6e-240	1.26e-237
ENSG00000116133	7192.36	1.8947	0.0582065	32.5513	2.01e-232	3.02e-230
ENSG00000104953	39.8793	1.89189	0.504793	3.74785	0.000178356	0.000517065
ENSG00000111879	110.281	1.89151	0.3125	6.05282	1.42e-09	6.65e-09
ENSG00000153294	157.571	1.89085	0.270025	7.00252	2.51e-12	1.42e-11
ENSG00000188738	43.7967	1.88816	0.475288	3.97267	7.11e-05	0.000215994
ENSG00000243244	179.174	1.88811	0.231011	8.17325	3e-16	2.12e-15
ENSG00000151229	100.853	1.88341	0.305341	6.16821	6.91e-10	3.3e-09
ENSG00000206530	421.753	1.88103	0.155364	12.1072	9.67e-34	1.35e-32
ENSG00000178401	4536.55	1.88073	0.0608855	30.8897	1.64e-209	2.06e-207
ENSG00000147174	44.0656	1.88043	0.459173	4.09526	4.22e-05	0.000131847
ENSG00000088881	421.856	1.87486	0.158561	11.8242	2.93e-32	3.86e-31
ENSG00000123095	25.3894	1.87143	0.636179	2.94168	0.00326439	0.00797436
ENSG00000171863	17097.8	1.87103	0.0485422	38.5445	0	0
ENSG00000127824	181.132	1.87076	0.229995	8.13389	4.16e-16	2.9e-15
ENSG00000069966	678.646	1.86902	0.128311	14.5664	4.59e-48	9.37e-47
ENSG00000121207	20.0312	1.8671	0.690921	2.70233	0.00688554	0.0159337
ENSG00000183405	1866.21	1.86459	0.0808769	23.0546	1.32e-117	7.71e-116
ENSG00000164684	1141.77	1.85792	0.0984818	18.8656	2.19e-79	7.88e-78
ENSG00000179454	2347.54	1.85724	0.0775787	23.94	1.17e-126	7.6e-125
ENSG00000100228	260.521	1.85468	0.194271	9.54686	1.34e-21	1.22e-20
ENSG00000167964	1455.83	1.85423	0.0918223	20.1936	1.11e-90	4.69e-89
ENSG00000069493	83.0604	1.852	0.33928	5.45861	4.8e-08	1.99e-07
ENSG00000123612	16.5717	1.85199	0.759408	2.43873	0.014739	0.0320234
ENSG00000104723	3085.85	1.85112	0.0680777	27.1913	8.23e-163	7.5e-161
ENSG00000154639	404.479	1.85067	0.157364	11.7604	6.24e-32	8.14e-31
ENSG00000092108	6229.16	1.85053	0.0580498	31.8782	5.35e-223	7.42e-221
ENSG00000133789	1001.22	1.85013	0.105545	17.5292	8.57e-69	2.61e-67
ENSG00000140600	90.9675	1.8496	0.32129	5.75679	8.57e-09	3.77e-08
ENSG00000110723	348.726	1.84777	0.180119	10.2586	1.08e-24	1.1e-23
ENSG00000129534	7778.85	1.84657	0.0668473	27.6236	5.79e-168	5.44e-166
ENSG00000135404	7238.72	1.84394	0.0542037	34.0188	1.18e-253	2.18e-251
ENSG00000125246	119.301	1.84387	0.292276	6.30866	2.81e-10	1.38e-09
ENSG00000163132	27.9676	1.84321	0.587342	3.13822	0.00169978	0.00433695
ENSG00000135842	236.453	1.84298	0.202912	9.08267	1.06e-19	8.85e-19
ENSG00000204128	17.4915	1.84259	0.767513	2.40073	0.0163623	0.0351772
ENSG00000145794	11.2328	1.84124	0.924446	1.99173	0.0464011	0.0895955
ENSG00000133302	1651.8	1.84093	0.0932609	19.7395	9.87e-87	3.94e-85
ENSG00000137103	116.889	1.83943	0.290229	6.33784	2.33e-10	1.15e-09
ENSG00000165985	13.2827	1.83918	0.829283	2.21779	0.0265691	0.0544804
ENSG00000134324	948.554	1.83751	0.109405	16.7955	2.63e-63	7.29e-62
ENSG00000131378	108.846	1.83697	0.297072	6.18357	6.27e-10	3e-09
ENSG00000162576	155.16	1.83474	0.248244	7.39089	1.46e-13	8.91e-13
ENSG00000162949	120.341	1.83193	0.287177	6.3791	1.78e-10	8.88e-10
ENSG00000221995	33.2065	1.83147	0.535022	3.42318	0.000618936	0.00168363
ENSG00000170634	145.842	1.82983	0.258306	7.08399	1.4e-12	8.07e-12
ENSG00000174945	1572.99	1.82846	0.0883028	20.7067	3.01e-95	1.35e-93
ENSG00000172264	122.794	1.82786	0.288319	6.33972	2.3e-10	1.14e-09
ENSG00000115194	44.813	1.82727	0.456419	4.00349	6.24e-05	0.000190815
ENSG00000217648	22.0675	1.82651	0.647958	2.81888	0.00481922	0.0114337
ENSG00000129657	2551.2	1.82512	0.0717683	25.4307	1.15e-142	8.72e-141
ENSG00000171865	1002.29	1.82321	0.110986	16.4275	1.22e-60	3.2e-59
ENSG00000109794	37.2019	1.8167	0.497615	3.65081	0.000261417	0.00074403
ENSG00000198934	68.104	1.81594	0.383093	4.74021	2.13e-06	7.66e-06
ENSG00000251595	43.4672	1.81448	0.465492	3.89798	9.7e-05	0.000290082
ENSG00000121005	53.2808	1.81185	0.416417	4.35104	1.35e-05	4.48e-05
ENSG00000151726	1939.46	1.81141	0.0801286	22.6063	3.76e-113	2.11e-111
ENSG00000151090	1004.17	1.81126	0.107524	16.8451	1.14e-63	3.17e-62
ENSG00000188785	143.137	1.80586	0.256475	7.0411	1.91e-12	1.09e-11
ENSG00000101197	22.5321	1.80116	0.645497	2.79034	0.00526524	0.0124206
ENSG00000100504	854.07	1.80111	0.113456	15.875	9.44e-57	2.32e-55
ENSG00000134569	65.9694	1.80071	0.376506	4.78269	1.73e-06	6.25e-06
ENSG00000145247	1148.6	1.8005	0.102364	17.5892	2.98e-69	9.17e-68
ENSG00000143013	1148.32	1.78828	0.098239	18.2034	4.85e-74	1.61e-72
ENSG00000161958	29.0891	1.78776	0.578493	3.09038	0.00199901	0.00504182
ENSG00000179361	170.02	1.78625	0.235675	7.57929	3.47e-14	2.19e-13
ENSG00000120324	45.071	1.78623	0.451577	3.95554	7.64e-05	0.000231257
ENSG00000037280	167.971	1.78595	0.242157	7.3752	1.64e-13	9.96e-13
ENSG00000175183	28.938	1.78516	0.562259	3.17497	0.00149851	0.00385586
ENSG00000183032	157.488	1.78334	0.257683	6.9207	4.49e-12	2.5e-11
ENSG00000122390	78.6024	1.78326	0.345154	5.16657	2.38e-07	9.3e-07
ENSG00000032389	1346.73	1.77993	0.0912408	19.5081	9.38e-85	3.63e-83
ENSG00000137941	37.2331	1.7751	0.502249	3.53429	0.000408865	0.00113898
ENSG00000151693	1408.21	1.77468	0.0922001	19.2481	1.46e-82	5.49e-81
ENSG00000136040	57.2007	1.77177	0.413601	4.28378	1.84e-05	5.99e-05
ENSG00000177106	4028.9	1.77033	0.0687822	25.7382	4.38e-146	3.44e-144
ENSG00000157978	999.368	1.76916	0.105825	16.7178	9.72e-63	2.66e-61
ENSG00000145506	108.933	1.7685	0.303054	5.83561	5.36e-09	2.4e-08
ENSG00000160285	2172.08	1.76748	0.0836997	21.1169	5.56e-99	2.66e-97
ENSG00000164440	13.8037	1.76636	0.809217	2.1828	0.0290503	0.0590614
ENSG00000138413	2581.81	1.76606	0.0730466	24.1772	3.86e-129	2.56e-127
ENSG00000093144	1652.81	1.76599	0.102446	17.2382	1.37e-66	4e-65
ENSG00000135709	1445.2	1.76413	0.0903812	19.5188	7.6e-85	2.95e-83
ENSG00000142173	177.155	1.76401	0.23164	7.61531	2.63e-14	1.67e-13
ENSG00000168615	5978.99	1.75949	0.0592003	29.7209	4.12e-194	4.72e-192
ENSG00000196535	1637.82	1.75706	0.090515	19.4118	6.13e-84	2.33e-82
ENSG00000136161	54.7249	1.75591	0.414189	4.23939	2.24e-05	7.23e-05
ENSG00000162148	35.7783	1.75569	0.509319	3.44713	0.000566569	0.00154823
ENSG00000131019	53.9681	1.75553	0.414565	4.23463	2.29e-05	7.38e-05
ENSG00000100852	12080.5	1.75451	0.0568585	30.8574	4.46e-209	5.51e-207
ENSG00000181790	612.458	1.75249	0.129763	13.5053	1.46e-41	2.52e-40
ENSG00000186814	338.201	1.74868	0.17244	10.1408	3.64e-24	3.64e-23
ENSG00000179104	634.977	1.74675	0.126492	13.8092	2.24e-43	4.09e-42
ENSG00000125844	3636.08	1.7422	0.066668	26.1325	1.56e-150	1.28e-148
ENSG00000131037	2360.04	1.74212	0.0848904	20.522	1.37e-93	6e-92
ENSG00000130787	3394.71	1.73898	0.0705564	24.6466	4e-134	2.83e-132
ENSG00000172915	388.807	1.73615	0.158371	10.9625	5.79e-28	6.63e-27
ENSG00000143641	1240.61	1.73593	0.0955365	18.1704	8.86e-74	2.93e-72
ENSG00000105137	44.6385	1.73533	0.484463	3.58196	0.000341023	0.000959683
ENSG00000150551	116.447	1.73482	0.28781	6.02766	1.66e-09	7.74e-09
ENSG00000197217	1254.67	1.73409	0.0941927	18.41	1.09e-75	3.71e-74
ENSG00000117174	1612.94	1.73371	0.086673	20.0029	5.2e-89	2.13e-87
ENSG00000130997	15.5884	1.73368	0.763028	2.27211	0.0230798	0.0480025
ENSG00000175264	12.5916	1.73323	0.858971	2.0178	0.0436119	0.0847193
ENSG00000125266	441.541	1.7318	0.148896	11.6309	2.87e-31	3.68e-30
ENSG00000072954	147.158	1.73166	0.254151	6.81352	9.52e-12	5.18e-11
ENSG00000145545	1231.71	1.7316	0.0945591	18.3124	6.59e-75	2.21e-73
ENSG00000211455	1687.69	1.73049	0.0877929	19.7111	1.73e-86	6.88e-85
ENSG00000148908	1440.62	1.72894	0.0917341	18.8473	3.09e-79	1.11e-77
ENSG00000197599	52.2753	1.72778	0.423382	4.0809	4.49e-05	0.000139778
ENSG00000152402	1478.45	1.72747	0.095314	18.124	2.06e-73	6.77e-72
ENSG00000119203	2628.28	1.72656	0.0764309	22.5898	5.45e-113	3.05e-111
ENSG00000134215	1956.77	1.72455	0.0797411	21.6269	1e-103	5.08e-102
ENSG00000102580	2326.91	1.72323	0.0793365	21.7206	1.31e-104	6.72e-103
ENSG00000207501	12.4212	1.72106	0.853589	2.01627	0.043772	0.0849689
ENSG00000164574	7956.23	1.72103	0.054644	31.4953	1.01e-217	1.34e-215
ENSG00000214226	61.9968	1.71995	0.387485	4.43874	9.05e-06	3.06e-05
ENSG00000213406	135.368	1.71744	0.263945	6.5068	7.68e-11	3.93e-10
ENSG00000150527	335.571	1.71342	0.178327	9.60831	7.37e-22	6.78e-21
ENSG00000100253	13.1899	1.71142	0.849463	2.0147	0.0439357	0.0852463
ENSG00000116017	798.186	1.71017	0.119241	14.3421	1.19e-46	2.34e-45
ENSG00000075420	1772.26	1.70858	0.0839112	20.3617	3.66e-92	1.57e-90
ENSG00000070778	527.355	1.7081	0.142076	12.0224	2.71e-33	3.71e-32
ENSG00000110318	109.059	1.70709	0.291359	5.85905	4.66e-09	2.09e-08
ENSG00000162620	21.2596	1.7025	0.67171	2.53457	0.0112584	0.0250505
ENSG00000162409	301.021	1.70185	0.178246	9.54775	1.33e-21	1.21e-20
ENSG00000117592	8088.71	1.69905	0.0521994	32.5492	2.15e-232	3.21e-230
ENSG00000106025	540.449	1.69826	0.135223	12.559	3.55e-36	5.35e-35
ENSG00000179242	17.3183	1.69218	0.725703	2.33178	0.0197124	0.0416186
ENSG00000165821	502.533	1.68952	0.145062	11.647	2.38e-31	3.05e-30
ENSG00000162913	37.8505	1.68727	0.490482	3.44002	0.000581666	0.00158606
ENSG00000142149	124.389	1.68619	0.281218	5.99603	2.02e-09	9.35e-09
ENSG00000139269	245.476	1.6836	0.197104	8.5417	1.32e-17	1e-16
ENSG00000104419	1311.36	1.68319	0.0967717	17.3934	9.26e-68	2.78e-66
ENSG00000130962	116.589	1.67623	0.281855	5.94714	2.73e-09	1.25e-08
ENSG00000113319	16.1364	1.67094	0.745791	2.2405	0.0250587	0.0516787
ENSG00000116039	130.705	1.6708	0.268131	6.23128	4.63e-10	2.23e-09
ENSG00000183049	691.258	1.66877	0.121587	13.7249	7.21e-43	1.3e-41
ENSG00000172986	123.989	1.66471	0.2725	6.10903	1e-09	4.73e-09
ENSG00000173852	736.754	1.66434	0.12663	13.1433	1.86e-39	3.05e-38
ENSG00000167291	8446.32	1.66164	0.0611772	27.161	1.88e-162	1.7e-160
ENSG00000134308	11592.9	1.66144	0.0496763	33.4453	3.01e-245	5.18e-243
ENSG00000181061	1191.34	1.65483	0.0957134	17.2894	5.65e-67	1.67e-65
ENSG00000164733	4466.01	1.65379	0.0620424	26.6559	1.53e-156	1.33e-154
ENSG00000264918	16.2596	1.65143	0.765359	2.15772	0.0309496	0.0625034
ENSG00000162976	1011.82	1.64956	0.102904	16.0301	7.88e-58	1.97e-56
ENSG00000186806	215.787	1.6481	0.215073	7.66297	1.82e-14	1.17e-13
ENSG00000183255	8591.98	1.64795	0.0512251	32.1708	4.52e-227	6.39e-225
ENSG00000183023	120.684	1.64611	0.28259	5.82508	5.71e-09	2.55e-08
ENSG00000131069	557.481	1.64464	0.135789	12.1117	9.16e-34	1.28e-32
ENSG00000197815	13.063	1.64448	0.834188	1.97136	0.0486829	0.0935647
ENSG00000149231	149.879	1.64268	0.250699	6.55239	5.66e-11	2.92e-10
ENSG00000165355	1955.72	1.64216	0.0827591	19.8427	1.28e-87	5.16e-86
ENSG00000188157	10388.9	1.64139	0.0666621	24.6225	7.25e-134	5.1e-132
ENSG00000254502	36.677	1.64115	0.50135	3.27346	0.00106238	0.0027921
ENSG00000116661	18.6921	1.63754	0.697564	2.34751	0.0188995	0.0400516
ENSG00000143815	1543.3	1.6365	0.0906536	18.0522	7.57e-73	2.47e-71
ENSG00000123384	569.484	1.6363	0.141067	11.5995	4.15e-31	5.29e-30
ENSG00000135926	36.4968	1.63554	0.507752	3.22115	0.00127677	0.00331745
ENSG00000162825	124.182	1.63351	0.281955	5.79353	6.89e-09	3.06e-08
ENSG00000177839	84.8889	1.63293	0.329443	4.95663	7.17e-07	2.69e-06
ENSG00000232237	18.5313	1.63171	0.711248	2.29415	0.0217819	0.0455674
ENSG00000065357	121.877	1.6292	0.281164	5.79447	6.85e-09	3.04e-08
ENSG00000111817	253.906	1.62771	0.192063	8.47489	2.35e-17	1.76e-16
ENSG00000101605	16.5881	1.62649	0.742981	2.18914	0.028587	0.0582405
ENSG00000214279	172.946	1.62613	0.231435	7.02627	2.12e-12	1.21e-11
ENSG00000182957	2186.97	1.62563	0.0754436	21.5476	5.58e-103	2.81e-101
ENSG00000115884	6794	1.62481	0.057605	28.206	4.93e-175	4.93e-173
ENSG00000178935	516.712	1.62433	0.138811	11.7018	1.25e-31	1.62e-30
ENSG00000135116	159.362	1.62423	0.241351	6.72974	1.7e-11	9.1e-11
ENSG00000154978	527.459	1.62361	0.136128	11.9271	8.55e-33	1.15e-31
ENSG00000109670	1227.97	1.62355	0.0976013	16.6345	3.92e-62	1.06e-60
ENSG00000262576	72.5419	1.62244	0.364968	4.44543	8.77e-06	2.97e-05
ENSG00000268798	14.8327	1.62112	0.775927	2.08927	0.0366836	0.0726379
ENSG00000128487	2952.61	1.62066	0.0730812	22.1762	5.83e-109	3.13e-107
ENSG00000132470	3869.1	1.62058	0.0753792	21.499	1.59e-102	7.98e-101
ENSG00000136243	292.488	1.61899	0.181116	8.93901	3.93e-19	3.22e-18
ENSG00000198964	2257.23	1.61763	0.0759454	21.3	1.14e-100	5.59e-99
ENSG00000104361	3324.74	1.61603	0.0691565	23.3677	9.11e-121	5.46e-119
ENSG00000185561	40.1054	1.61583	0.477036	3.38723	0.000706018	0.00190413
ENSG00000125657	20.7977	1.61292	0.668199	2.41383	0.0157857	0.0340738
ENSG00000178750	15.9523	1.6123	0.770747	2.09187	0.0364499	0.0722683
ENSG00000163293	408.818	1.61036	0.156674	10.2784	8.82e-25	9.05e-24
ENSG00000198718	2850.42	1.6094	0.0761144	21.1444	3.1e-99	1.5e-97
ENSG00000198169	553.21	1.60873	0.135751	11.8506	2.14e-32	2.84e-31
ENSG00000166046	338.833	1.60799	0.167911	9.57646	1e-21	9.19e-21
ENSG00000128872	366.922	1.60756	0.161923	9.92792	3.15e-23	3.07e-22
ENSG00000259856	19.3986	1.6067	0.681682	2.35696	0.0184253	0.0391084
ENSG00000180914	90.214	1.6053	0.327726	4.89831	9.67e-07	3.57e-06
ENSG00000171502	65.3893	1.60496	0.37161	4.31893	1.57e-05	5.14e-05
ENSG00000117385	216.613	1.60436	0.229156	7.00118	2.54e-12	1.43e-11
ENSG00000185090	356.908	1.60142	0.16397	9.76654	1.57e-22	1.49e-21
ENSG00000035862	546.386	1.59938	0.134458	11.8951	1.26e-32	1.67e-31
ENSG00000089159	7580.76	1.59743	0.061245	26.0826	5.75e-150	4.68e-148
ENSG00000122729	439.53	1.59674	0.148259	10.77	4.77e-27	5.29e-26
ENSG00000144645	1462.59	1.59651	0.0885668	18.026	1.22e-72	3.93e-71
ENSG00000151117	57.1197	1.5963	0.399129	3.99945	6.35e-05	0.000193944
ENSG00000205730	2486.21	1.59587	0.0789598	20.2112	7.8e-91	3.3e-89
ENSG00000198933	194.411	1.59491	0.220176	7.24379	4.36e-13	2.59e-12
ENSG00000135083	432.169	1.59425	0.150281	10.6085	2.72e-26	2.94e-25
ENSG00000183722	13.5148	1.59123	0.809998	1.96448	0.0494743	0.0949162
ENSG00000052802	1347.37	1.59113	0.105863	15.0301	4.66e-51	1e-49
ENSG00000006125	9281.73	1.59014	0.0501562	31.7038	1.38e-220	1.86e-218
ENSG00000164877	1091.74	1.58836	0.104314	15.2268	2.35e-52	5.25e-51
ENSG00000186522	828.365	1.58734	0.112928	14.0562	7.06e-45	1.34e-43
ENSG00000073849	96.4694	1.58649	0.307004	5.16764	2.37e-07	9.25e-07
ENSG00000203799	76.992	1.58221	0.343977	4.59976	4.23e-06	1.48e-05
ENSG00000119703	43.3668	1.58089	0.456827	3.4606	0.000538981	0.00147904
ENSG00000163513	291.186	1.57952	0.184132	8.57819	9.64e-18	7.35e-17
ENSG00000115756	1544.2	1.57903	0.0883181	17.8788	1.72e-71	5.45e-70
ENSG00000249863	24.105	1.57893	0.622326	2.53715	0.0111758	0.0248951
ENSG00000156011	1502.61	1.57885	0.0875978	18.0239	1.27e-72	4.07e-71
ENSG00000077232	6490.91	1.57714	0.0566472	27.8415	1.37e-170	1.32e-168
ENSG00000152926	1038.04	1.57663	0.118028	13.3581	1.06e-40	1.8e-39
ENSG00000058063	1672.08	1.57545	0.0851474	18.5026	1.97e-76	6.8e-75
ENSG00000104687	4690.97	1.57521	0.061793	25.4917	2.44e-143	1.85e-141
ENSG00000142765	2549.48	1.57371	0.0752442	20.9146	3.94e-97	1.83e-95
ENSG00000163888	63.4343	1.57336	0.378767	4.15391	3.27e-05	0.000103344
ENSG00000115183	2091.49	1.57009	0.0764305	20.5427	8.94e-94	3.94e-92
ENSG00000094841	192.002	1.56943	0.221544	7.08407	1.4e-12	8.07e-12
ENSG00000020577	906.11	1.56885	0.109673	14.3048	2.04e-46	3.98e-45
ENSG00000143507	127.949	1.56796	0.268324	5.84352	5.11e-09	2.29e-08
ENSG00000240809	42.4419	1.56754	0.467229	3.35496	0.000793756	0.00212214
ENSG00000138696	344.505	1.56602	0.173588	9.02146	1.86e-19	1.54e-18
ENSG00000109458	1028.58	1.56585	0.102269	15.3111	6.44e-53	1.46e-51
ENSG00000162174	75.463	1.56522	0.345832	4.52597	6.01e-06	2.07e-05
ENSG00000203836	41.969	1.56424	0.570447	2.74214	0.00610408	0.0142557
ENSG00000198673	23.0364	1.56395	0.624181	2.5056	0.0122242	0.0270068
ENSG00000164638	197.981	1.5636	0.2287	6.83692	8.09e-12	4.42e-11
ENSG00000084764	271.22	1.56074	0.186749	8.35738	6.41e-17	4.68e-16
ENSG00000140391	5669.54	1.55983	0.0567538	27.4841	2.72e-166	2.52e-164
ENSG00000100644	7389.41	1.55952	0.0570863	27.3187	2.55e-164	2.33e-162
ENSG00000175155	1464.88	1.5585	0.0930796	16.7437	6.3e-63	1.73e-61
ENSG00000078804	169.309	1.55835	0.23647	6.59006	4.4e-11	2.29e-10
ENSG00000143434	119.75	1.55739	0.288652	5.39538	6.84e-08	2.79e-07
ENSG00000177432	25.1397	1.55696	0.632685	2.46088	0.0138599	0.0302636
ENSG00000105519	286.048	1.5566	0.18371	8.47313	2.39e-17	1.79e-16
ENSG00000134318	2819.93	1.55643	0.0711969	21.8609	6.12e-106	3.2e-104
ENSG00000212127	23.6768	1.55615	0.616197	2.52541	0.0115564	0.0256577
ENSG00000160211	21661.6	1.55148	0.0634394	24.4561	4.34e-132	3e-130
ENSG00000213326	73.6024	1.5489	0.360066	4.30172	1.69e-05	5.54e-05
ENSG00000109189	1090.28	1.54732	0.102315	15.1231	1.14e-51	2.49e-50
ENSG00000099812	3337.18	1.54524	0.0744774	20.7477	1.29e-95	5.77e-94
ENSG00000198744	20910.7	1.5448	0.0534316	28.9117	8.5e-184	8.97e-182
ENSG00000136560	1730.39	1.54301	0.087256	17.6837	5.6e-70	1.74e-68
ENSG00000179344	94.0602	1.54288	0.314837	4.90056	9.56e-07	3.54e-06
ENSG00000182362	155.115	1.54281	0.243005	6.34887	2.17e-10	1.07e-09
ENSG00000095752	53.1766	1.54236	0.414227	3.72348	0.000196497	0.000567212
ENSG00000008394	2910.27	1.539	0.0756206	20.3516	4.49e-92	1.93e-90
ENSG00000178878	218.477	1.5319	0.207044	7.39893	1.37e-13	8.39e-13
ENSG00000225828	69.3399	1.52912	0.359632	4.25191	2.12e-05	6.85e-05
ENSG00000171867	1738.81	1.52848	0.089565	17.0656	2.68e-65	7.64e-64
ENSG00000166562	1572.89	1.52705	0.0899108	16.984	1.08e-64	3.06e-63
ENSG00000204334	25.1964	1.52631	0.596312	2.55959	0.0104796	0.0235024
ENSG00000123358	999.99	1.52321	0.102971	14.7926	1.63e-49	3.42e-48
ENSG00000070540	303.087	1.52119	0.175647	8.66047	4.7e-18	3.64e-17
ENSG00000142156	81.7113	1.51947	0.33615	4.5202	6.18e-06	2.13e-05
ENSG00000104765	2033.01	1.51762	0.0840889	18.0478	8.2e-73	2.67e-71
ENSG00000153237	28.1127	1.51754	0.563619	2.69249	0.00709201	0.0163762
ENSG00000067225	52522.7	1.51683	0.0519972	29.1713	4.48e-187	4.82e-185
ENSG00000255408	35.5064	1.51674	0.503786	3.01068	0.00260663	0.00646611
ENSG00000136052	466.614	1.51547	0.143702	10.5459	5.31e-26	5.69e-25
ENSG00000228158	22.6302	1.51362	0.645092	2.34637	0.0189574	0.0401585
ENSG00000143416	5788.44	1.51349	0.063896	23.6867	4.94e-124	3.1e-122
ENSG00000105136	209.276	1.51181	0.221063	6.83881	7.99e-12	4.36e-11
ENSG00000164050	3521.77	1.51132	0.0717018	21.0779	1.27e-98	6e-97
ENSG00000197249	223.708	1.51036	0.203801	7.41097	1.25e-13	7.69e-13
ENSG00000198938	156768	1.51009	0.0426503	35.4064	1.36e-274	2.93e-272
ENSG00000100739	15.8865	1.50811	0.755801	1.99538	0.0460014	0.0889195
ENSG00000197182	18.5242	1.50785	0.689505	2.18686	0.0287528	0.0585063
ENSG00000104728	1311.93	1.50675	0.0958037	15.7275	9.8e-56	2.37e-54
ENSG00000151715	384.005	1.50659	0.157171	9.58572	9.18e-22	8.42e-21
ENSG00000100883	8626.45	1.50527	0.0575752	26.1445	1.14e-150	9.46e-149
ENSG00000115525	182.06	1.50482	0.227968	6.60104	4.08e-11	2.13e-10
ENSG00000186665	1509.53	1.50026	0.0861115	17.4223	5.59e-68	1.69e-66
ENSG00000186417	44.9801	1.49997	0.461303	3.25159	0.00114762	0.00300145
ENSG00000135631	140.68	1.49976	0.260907	5.74824	9.02e-09	3.96e-08
ENSG00000256294	66.5621	1.49967	0.366018	4.09725	4.18e-05	0.000130796
ENSG00000052126	908.869	1.49909	0.108009	13.8793	8.45e-44	1.56e-42
ENSG00000249986	115.683	1.4986	0.281638	5.32103	1.03e-07	4.16e-07
ENSG00000111215	65.7837	1.49785	0.380281	3.93879	8.19e-05	0.000247032
ENSG00000196562	17678.6	1.49655	0.0503164	29.7428	2.15e-194	2.47e-192
ENSG00000072310	9036.71	1.49268	0.0657264	22.7105	3.52e-114	1.98e-112
ENSG00000167693	34.9715	1.49267	0.503546	2.96431	0.0030336	0.00745457
ENSG00000025039	492.031	1.49236	0.140586	10.6153	2.53e-26	2.74e-25
ENSG00000119772	692.247	1.49215	0.124125	12.0213	2.75e-33	3.75e-32
ENSG00000121691	2350.21	1.49059	0.0753704	19.7769	4.71e-87	1.89e-85
ENSG00000160305	2190.82	1.48946	0.075396	19.7552	7.24e-87	2.9e-85
ENSG00000116128	2454.47	1.48923	0.0757845	19.6508	5.69e-86	2.25e-84
ENSG00000198892	65.2562	1.48899	0.370095	4.02326	5.74e-05	0.000176056
ENSG00000173083	240.982	1.48886	0.203918	7.30125	2.85e-13	1.71e-12
ENSG00000162430	1289.32	1.48871	0.0962291	15.4705	5.49e-54	1.27e-52
ENSG00000178202	943.08	1.48818	0.107882	13.7945	2.75e-43	5.01e-42
ENSG00000180773	162.019	1.48792	0.246913	6.02607	1.68e-09	7.81e-09
ENSG00000137193	360.209	1.48608	0.162023	9.17202	4.64e-20	3.94e-19
ENSG00000147437	21.3814	1.48412	0.68265	2.17406	0.0297006	0.0602468
ENSG00000198604	12011.5	1.48406	0.0506856	29.2798	1.88e-188	2.06e-186
ENSG00000138670	148.883	1.48355	0.250574	5.92061	3.21e-09	1.46e-08
ENSG00000113430	209.478	1.4829	0.211899	6.99813	2.59e-12	1.46e-11
ENSG00000101333	1465.09	1.48282	0.0920409	16.1105	2.15e-58	5.44e-57
ENSG00000088836	312.219	1.47968	0.175615	8.42572	3.59e-17	2.66e-16
ENSG00000185043	2981.4	1.47762	0.0681847	21.6708	3.87e-104	1.97e-102
ENSG00000163864	31.1249	1.47657	0.532819	2.77125	0.0055842	0.0131313
ENSG00000188910	49.8017	1.47562	0.435468	3.38858	0.000702568	0.00189578
ENSG00000206535	83.4402	1.47516	0.330685	4.46092	8.16e-06	2.77e-05
ENSG00000213023	38.2952	1.47389	0.540568	2.72655	0.00640001	0.0148983
ENSG00000231991	687.66	1.47304	0.146267	10.0709	7.43e-24	7.36e-23
ENSG00000164002	79.2229	1.47166	0.353981	4.15744	3.22e-05	0.000101822
ENSG00000099625	211.814	1.47156	0.214687	6.85442	7.16e-12	3.93e-11
ENSG00000151694	1608.31	1.47155	0.0850008	17.3122	3.81e-67	1.12e-65
ENSG00000164093	84.1714	1.47121	0.330572	4.45049	8.57e-06	2.91e-05
ENSG00000240890	33.4162	1.46775	0.52121	2.81604	0.00486194	0.0115312
ENSG00000163110	2089.07	1.46749	0.0787104	18.6442	1.41e-77	4.96e-76
ENSG00000170293	503.711	1.46714	0.141974	10.3339	4.95e-25	5.11e-24
ENSG00000186907	72.4375	1.46238	0.351298	4.16279	3.14e-05	9.96e-05
ENSG00000257093	3153.16	1.46237	0.0660168	22.1515	1.01e-108	5.39e-107
ENSG00000109171	1964.54	1.4598	0.0794162	18.3816	1.84e-75	6.25e-74
ENSG00000233836	186.27	1.45926	0.230175	6.33978	2.3e-10	1.14e-09
ENSG00000122711	142.604	1.45899	0.2544	5.73502	9.75e-09	4.27e-08
ENSG00000163694	5123.71	1.45872	0.0579296	25.1809	6.48e-140	4.79e-138
ENSG00000162994	89.2102	1.45728	0.323951	4.49846	6.84e-06	2.35e-05
ENSG00000138081	2022.11	1.45656	0.0780943	18.6514	1.23e-77	4.35e-76
ENSG00000119042	768.202	1.45609	0.118712	12.2658	1.38e-34	1.98e-33
ENSG00000203778	31.8336	1.45499	0.530462	2.74287	0.00609042	0.0142284
ENSG00000153132	644.586	1.45359	0.127154	11.4317	2.9e-30	3.61e-29
ENSG00000110042	566.615	1.45308	0.131092	11.0845	1.49e-28	1.75e-27
ENSG00000155760	202.146	1.45067	0.215565	6.72963	1.7e-11	9.11e-11
ENSG00000129951	22.9648	1.45012	0.64972	2.23191	0.0256208	0.0527369
ENSG00000168994	38.5961	1.44939	0.48014	3.01869	0.00253871	0.00630983
ENSG00000177932	252.029	1.44933	0.209473	6.91896	4.55e-12	2.53e-11
ENSG00000136379	3315.96	1.44898	0.0651611	22.237	1.51e-109	8.17e-108
ENSG00000083828	185.81	1.44774	0.222837	6.49688	8.2e-11	4.19e-10
ENSG00000111962	680.073	1.44463	0.12064	11.9748	4.82e-33	6.52e-32
ENSG00000138061	804.459	1.44238	0.113931	12.6601	9.84e-37	1.51e-35
ENSG00000006453	1706.31	1.44079	0.0836236	17.2295	1.59e-66	4.64e-65
ENSG00000185551	926.789	1.44014	0.112483	12.8032	1.57e-37	2.46e-36
ENSG00000148120	811.684	1.43418	0.111839	12.8236	1.21e-37	1.9e-36
ENSG00000197128	150.857	1.43097	0.253721	5.63993	1.7e-08	7.32e-08
ENSG00000198719	131.697	1.42871	0.275934	5.17772	2.25e-07	8.79e-07
ENSG00000269765	56.0207	1.42643	0.397404	3.58938	0.000331467	0.000933767
ENSG00000128016	763.945	1.42523	0.118543	12.0229	2.69e-33	3.69e-32
ENSG00000108039	1429.15	1.4252	0.0897421	15.881	8.58e-57	2.11e-55
ENSG00000134247	4746.18	1.42466	0.0587229	24.2607	5.09e-130	3.39e-128
ENSG00000152558	7870.64	1.42343	0.0607169	23.4438	1.53e-121	9.32e-120
ENSG00000056487	68.3418	1.42322	0.360263	3.95049	7.8e-05	0.000235962
ENSG00000167767	14135.8	1.41959	0.0510988	27.7814	7.29e-170	7e-168
ENSG00000162236	1031.51	1.41868	0.103771	13.6712	1.51e-42	2.69e-41
ENSG00000182534	72.2	1.41824	0.359873	3.94094	8.12e-05	0.000245038
ENSG00000188343	401.059	1.41637	0.192638	7.35253	1.94e-13	1.18e-12
ENSG00000136026	1842.59	1.41435	0.0815983	17.3331	2.65e-67	7.85e-66
ENSG00000147439	295.336	1.4143	0.178554	7.92087	2.36e-15	1.59e-14
ENSG00000130038	683.133	1.41398	0.120892	11.6962	1.33e-31	1.72e-30
ENSG00000253541	22.9071	1.41366	0.626959	2.25478	0.0241469	0.0499564
ENSG00000165025	767.731	1.41294	0.114795	12.3084	8.17e-35	1.18e-33
ENSG00000173898	5780.63	1.41235	0.0658809	21.4379	5.92e-102	2.95e-100
ENSG00000158201	289.853	1.41208	0.182062	7.75605	8.76e-15	5.71e-14
ENSG00000115107	1521.62	1.40913	0.0855578	16.47	6.03e-61	1.59e-59
ENSG00000139180	242.947	1.40906	0.198422	7.10134	1.24e-12	7.14e-12
ENSG00000073417	2738.69	1.40903	0.069594	20.2464	3.82e-91	1.62e-89
ENSG00000225950	19.5135	1.40851	0.672161	2.0955	0.0361264	0.0716995
ENSG00000183250	419.749	1.40844	0.152906	9.21112	3.23e-20	2.77e-19
ENSG00000141179	407.4	1.40783	0.153115	9.19461	3.76e-20	3.21e-19
ENSG00000064393	1983.01	1.40765	0.0794825	17.7102	3.5e-70	1.09e-68
ENSG00000109323	1145.19	1.40764	0.0958484	14.6861	7.92e-49	1.63e-47
ENSG00000187840	3528.38	1.40726	0.0763909	18.4218	8.78e-76	3e-74
ENSG00000101577	526.016	1.40647	0.135621	10.3706	3.37e-25	3.5e-24
ENSG00000109586	1976.06	1.406	0.080834	17.3937	9.21e-68	2.76e-66
ENSG00000112033	647.673	1.40446	0.122981	11.4201	3.32e-30	4.12e-29
ENSG00000175984	202.167	1.40341	0.214657	6.53794	6.24e-11	3.21e-10
ENSG00000115705	85.3945	1.40234	0.322507	4.34826	1.37e-05	4.53e-05
ENSG00000011105	1186.73	1.40124	0.0972263	14.4121	4.34e-47	8.62e-46
ENSG00000006016	41.718	1.39884	0.479909	2.9148	0.00355917	0.00862588
ENSG00000136295	2027	1.3975	0.0914119	15.288	9.19e-53	2.07e-51
ENSG00000033100	1138.29	1.39725	0.0994708	14.0468	8.05e-45	1.53e-43
ENSG00000153179	1301.14	1.3965	0.0927044	15.064	2.79e-51	6.06e-50
ENSG00000009950	326.758	1.39564	0.17829	7.82789	4.96e-15	3.27e-14
ENSG00000132879	411.964	1.39482	0.155492	8.97032	2.96e-19	2.43e-18
ENSG00000175318	51.081	1.39364	0.432964	3.21884	0.00128712	0.0033411
ENSG00000008710	4119.56	1.39307	0.0699649	19.911	3.27e-88	1.33e-86
ENSG00000145012	2193.83	1.39249	0.0793189	17.5556	5.39e-69	1.65e-67
ENSG00000160953	1335.16	1.39164	0.0899236	15.4758	5.06e-54	1.17e-52
ENSG00000164506	859.043	1.38965	0.108724	12.7815	2.08e-37	3.25e-36
ENSG00000178922	96.3455	1.38799	0.311205	4.46005	8.19e-06	2.79e-05
ENSG00000135740	152.25	1.38792	0.255452	5.43318	5.54e-08	2.28e-07
ENSG00000067182	2990.07	1.38791	0.0689822	20.1198	4.95e-90	2.06e-88
ENSG00000095383	345.907	1.38414	0.166042	8.33604	7.68e-17	5.58e-16
ENSG00000088538	139.805	1.38407	0.257936	5.36594	8.05e-08	3.27e-07
ENSG00000135362	87.3016	1.3831	0.330403	4.18609	2.84e-05	9.03e-05
ENSG00000153234	180.181	1.38284	0.227351	6.08239	1.18e-09	5.55e-09
ENSG00000104450	667.871	1.38084	0.130682	10.5665	4.26e-26	4.59e-25
ENSG00000127220	74.4286	1.37943	0.354509	3.89109	9.98e-05	0.000297983
ENSG00000118961	858.881	1.37907	0.10935	12.6115	1.82e-36	2.76e-35
ENSG00000063587	749.252	1.37742	0.114978	11.9799	4.53e-33	6.14e-32
ENSG00000166949	4280.46	1.37729	0.0622155	22.1374	1.38e-108	7.33e-107
ENSG00000265298	101.186	1.37458	0.299337	4.5921	4.39e-06	1.53e-05
ENSG00000176809	87.8117	1.3735	0.318714	4.30953	1.64e-05	5.36e-05
ENSG00000213976	21.7696	1.37271	0.645515	2.12653	0.0334592	0.0670431
ENSG00000184640	10942	1.37016	0.0647429	21.1631	2.09e-99	1.01e-97
ENSG00000131236	3830.82	1.36983	0.0627059	21.8453	8.61e-106	4.47e-104
ENSG00000140526	4968.08	1.36928	0.0576887	23.7357	1.54e-124	9.77e-123
ENSG00000110881	703.792	1.36912	0.118493	11.5544	7.01e-31	8.9e-30
ENSG00000140961	442.22	1.36858	0.152715	8.96169	3.2e-19	2.63e-18
ENSG00000256594	161.36	1.36799	0.238689	5.73126	9.97e-09	4.36e-08
ENSG00000117266	2636.62	1.36699	0.0731703	18.6823	6.9e-78	2.45e-76
ENSG00000141447	1097.01	1.36687	0.0980568	13.9396	3.64e-44	6.77e-43
ENSG00000170899	222.579	1.36408	0.202219	6.74556	1.52e-11	8.19e-11
ENSG00000072201	372.811	1.36368	0.159534	8.54787	1.25e-17	9.51e-17
ENSG00000235587	104.788	1.36292	0.293925	4.63696	3.54e-06	1.25e-05
ENSG00000155657	163.349	1.36127	0.23939	5.68641	1.3e-08	5.63e-08
ENSG00000013364	893.724	1.36083	0.10907	12.4766	1e-35	1.49e-34
ENSG00000115392	457.202	1.36019	0.153538	8.85898	8.08e-19	6.51e-18
ENSG00000091317	2970.59	1.35987	0.0687925	19.7678	5.64e-87	2.26e-85
ENSG00000187013	46.4671	1.35669	0.436728	3.1065	0.00189319	0.00479179
ENSG00000230982	25.763	1.35581	0.581116	2.33312	0.0196418	0.0414939
ENSG00000164078	280.135	1.35373	0.185117	7.31285	2.62e-13	1.57e-12
ENSG00000182606	1745.82	1.35371	0.0822297	16.4626	6.81e-61	1.8e-59
ENSG00000203546	36.7145	1.3532	0.493851	2.7401	0.00614207	0.0143319
ENSG00000167554	132.535	1.35081	0.260908	5.17736	2.25e-07	8.81e-07
ENSG00000133943	71.0978	1.35035	0.352343	3.83249	0.00012685	0.000374819
ENSG00000092140	4089.06	1.35027	0.0754241	17.9023	1.13e-71	3.6e-70
ENSG00000095380	1532.59	1.35019	0.0852317	15.8414	1.61e-56	3.95e-55
ENSG00000158863	1078.33	1.34951	0.105102	12.84	9.78e-38	1.54e-36
ENSG00000171004	308.862	1.34853	0.174807	7.71441	1.22e-14	7.86e-14
ENSG00000165288	777.5	1.34743	0.113202	11.9029	1.14e-32	1.53e-31
ENSG00000165521	389.12	1.34621	0.15675	8.5882	8.83e-18	6.78e-17
ENSG00000162105	2414.62	1.34568	0.0739909	18.1872	6.52e-74	2.16e-72
ENSG00000090097	505.911	1.34552	0.137026	9.81945	9.29e-23	8.87e-22
ENSG00000177697	5307.52	1.3452	0.0646349	20.8124	3.34e-96	1.51e-94
ENSG00000109971	32179.4	1.344	0.0437676	30.7076	4.5e-207	5.54e-205
ENSG00000198911	4667.24	1.3433	0.0727896	18.4546	4.79e-76	1.64e-74
ENSG00000167566	938.325	1.34289	0.110972	12.1011	1.04e-33	1.45e-32
ENSG00000165102	760.596	1.34285	0.114026	11.7767	5.15e-32	6.72e-31
ENSG00000144366	474.443	1.34257	0.145701	9.21451	3.13e-20	2.68e-19
ENSG00000159556	98.7943	1.34138	0.309156	4.33884	1.43e-05	4.72e-05
ENSG00000130449	736.126	1.34096	0.11671	11.4897	1.49e-30	1.87e-29
ENSG00000158966	59.5303	1.34085	0.388902	3.44778	0.000565207	0.00154489
ENSG00000269837	147.92	1.34043	0.251494	5.32988	9.83e-08	3.96e-07
ENSG00000152056	221.36	1.3397	0.203794	6.5738	4.9e-11	2.54e-10
ENSG00000123570	45.0402	1.33959	0.441724	3.03265	0.0024242	0.00604197
ENSG00000082805	1593.42	1.33935	0.0837491	15.9924	1.44e-57	3.6e-56
ENSG00000092148	20093.6	1.33853	0.0451638	29.6372	4.96e-193	5.61e-191
ENSG00000186047	29.6378	1.33836	0.549352	2.43625	0.0148405	0.0322211
ENSG00000137936	514.781	1.33797	0.142919	9.36174	7.84e-21	6.89e-20
ENSG00000112655	2821.55	1.33736	0.0685922	19.4973	1.16e-84	4.47e-83
ENSG00000214193	187.73	1.33505	0.219115	6.09291	1.11e-09	5.21e-09
ENSG00000135414	458.068	1.33143	0.150844	8.82654	1.08e-18	8.66e-18
ENSG00000162702	2655.72	1.33088	0.0695052	19.148	1.01e-81	3.74e-80
ENSG00000228232	250.176	1.33006	0.202618	6.56436	5.23e-11	2.7e-10
ENSG00000132906	136.802	1.32971	0.256536	5.18335	2.18e-07	8.54e-07
ENSG00000231982	30.626	1.32914	0.537594	2.47238	0.0134218	0.029411
ENSG00000114853	110.443	1.32137	0.289363	4.56648	4.96e-06	1.72e-05
ENSG00000158427	73.5127	1.32119	0.345577	3.82313	0.000131766	0.000388543
ENSG00000136943	285.848	1.32079	0.188356	7.01221	2.35e-12	1.33e-11
ENSG00000009307	151327	1.32015	0.0402528	32.7965	6.6e-236	1.06e-233
ENSG00000263002	161.374	1.32007	0.23528	5.61065	2.02e-08	8.61e-08
ENSG00000139722	945.999	1.31996	0.104401	12.6432	1.22e-36	1.86e-35
ENSG00000223612	28.4018	1.31943	0.563848	2.34004	0.0192816	0.040793
ENSG00000153982	202.169	1.31818	0.212714	6.19694	5.76e-10	2.76e-09
ENSG00000147535	950.487	1.31549	0.106572	12.3436	5.27e-35	7.66e-34
ENSG00000162695	720.728	1.31477	0.123487	10.6471	1.8e-26	1.96e-25
ENSG00000244627	24.4227	1.31262	0.604167	2.17261	0.0298097	0.0604282
ENSG00000157193	651.747	1.31234	0.12363	10.6151	2.54e-26	2.74e-25
ENSG00000100439	584.052	1.31108	0.128646	10.1914	2.17e-24	2.19e-23
ENSG00000162946	75.1234	1.30975	0.348217	3.7613	0.00016903	0.000491221
ENSG00000160932	10049.5	1.309	0.0585991	22.3382	1.57e-110	8.61e-109
ENSG00000174652	360.876	1.30776	0.169081	7.73452	1.04e-14	6.74e-14
ENSG00000236090	55.5147	1.30639	0.399075	3.27355	0.00106204	0.00279153
ENSG00000100196	408.99	1.30502	0.154514	8.44595	3.02e-17	2.24e-16
ENSG00000018408	1083.63	1.30415	0.107595	12.1209	8.18e-34	1.14e-32
ENSG00000111321	3229.4	1.30318	0.0688454	18.9291	6.56e-80	2.38e-78
ENSG00000157557	1452.38	1.30173	0.0893683	14.566	4.62e-48	9.42e-47
ENSG00000147364	542.747	1.301	0.133688	9.73157	2.21e-22	2.08e-21
ENSG00000099800	980.505	1.29945	0.108677	11.957	5.97e-33	8.05e-32
ENSG00000132640	1022.06	1.29853	0.102936	12.6149	1.75e-36	2.64e-35
ENSG00000196187	1030.18	1.29763	0.108465	11.9636	5.51e-33	7.45e-32
ENSG00000213331	27.4174	1.29691	0.564002	2.29948	0.0214777	0.045001
ENSG00000173926	56.4611	1.29671	0.397023	3.2661	0.00109041	0.00286191
ENSG00000150961	1542.06	1.29588	0.0853658	15.1803	4.77e-52	1.06e-50
ENSG00000130720	853.171	1.29571	0.132963	9.74491	1.94e-22	1.84e-21
ENSG00000104695	1790.52	1.29528	0.0798457	16.2222	3.51e-59	9.01e-58
ENSG00000143418	8378.51	1.29516	0.0538668	24.0437	9.73e-128	6.36e-126
ENSG00000164294	1042.9	1.29448	0.104806	12.3512	4.8e-35	6.99e-34
ENSG00000129521	235.108	1.29341	0.196488	6.58264	4.62e-11	2.4e-10
ENSG00000177427	464.758	1.29229	0.144665	8.93296	4.15e-19	3.39e-18
ENSG00000115170	924.118	1.29213	0.104996	12.3065	8.35e-35	1.2e-33
ENSG00000114315	1039.36	1.29209	0.10471	12.3398	5.53e-35	8.03e-34
ENSG00000139800	78.0401	1.29075	0.342266	3.77118	0.000162477	0.000473264
ENSG00000176428	179.806	1.29047	0.223397	5.77659	7.62e-09	3.37e-08
ENSG00000152284	86.559	1.29014	0.318664	4.04858	5.15e-05	0.000159375
ENSG00000138463	491.596	1.2901	0.152066	8.48386	2.18e-17	1.63e-16
ENSG00000171223	3768.71	1.2891	0.0751965	17.143	7.09e-66	2.04e-64
ENSG00000044459	174.176	1.28887	0.2308	5.58439	2.35e-08	9.96e-08
ENSG00000089060	378.905	1.28814	0.158457	8.12927	4.32e-16	3.01e-15
ENSG00000169223	7352.46	1.28802	0.0625061	20.6064	2.41e-94	1.07e-92
ENSG00000109063	33.6202	1.28549	0.532503	2.41405	0.0157763	0.034057
ENSG00000160310	1374.8	1.28517	0.0887411	14.4822	1.57e-47	3.17e-46
ENSG00000187091	200.475	1.2846	0.22106	5.81112	6.21e-09	2.76e-08
ENSG00000157637	3825.64	1.28397	0.0740804	17.3321	2.69e-67	7.98e-66
ENSG00000204991	729.969	1.28329	0.119301	10.7568	5.51e-27	6.1e-26
ENSG00000154640	132.742	1.28287	0.272075	4.71514	2.42e-06	8.63e-06
ENSG00000267680	64.8207	1.28277	0.369336	3.47317	0.00051435	0.00141523
ENSG00000103005	897.019	1.28151	0.112677	11.3733	5.68e-30	7.01e-29
ENSG00000160691	3591.13	1.28119	0.0641596	19.9688	1.03e-88	4.19e-87
ENSG00000069702	28.084	1.27892	0.556979	2.29616	0.0216666	0.0453484
ENSG00000166401	67.8522	1.27772	0.363943	3.51077	0.000446806	0.00123969
ENSG00000182118	103.202	1.27668	0.306213	4.16926	3.06e-05	9.7e-05
ENSG00000072210	4175.6	1.27633	0.0613899	20.7905	5.27e-96	2.37e-94
ENSG00000115761	1722.76	1.27335	0.0813593	15.651	3.27e-55	7.78e-54
ENSG00000137166	3150.27	1.27107	0.0797078	15.9467	3.01e-57	7.44e-56
ENSG00000105963	141.13	1.27024	0.25727	4.93739	7.92e-07	2.95e-06
ENSG00000185515	1484.01	1.26994	0.0869494	14.6055	2.59e-48	5.31e-47
ENSG00000154305	2072.15	1.26924	0.0787396	16.1195	1.86e-58	4.71e-57
ENSG00000065833	2764.04	1.26724	0.0702451	18.0402	9.41e-73	3.06e-71
ENSG00000082212	841.008	1.26671	0.113126	11.1974	4.2e-29	5.03e-28
ENSG00000186088	222.51	1.2659	0.202386	6.25488	3.98e-10	1.93e-09
ENSG00000138821	677.724	1.2641	0.122398	10.3278	5.28e-25	5.43e-24
ENSG00000141458	1404.57	1.26336	0.091111	13.8662	1.02e-43	1.87e-42
ENSG00000203485	4889.48	1.263	0.0649772	19.4376	3.71e-84	1.41e-82
ENSG00000138101	1064.52	1.26254	0.101181	12.4781	9.84e-36	1.46e-34
ENSG00000123201	202.811	1.2614	0.212442	5.9376	2.89e-09	1.32e-08
ENSG00000176124	407.177	1.26122	0.155966	8.08649	6.14e-16	4.25e-15
ENSG00000133858	2264.95	1.26099	0.0824383	15.2961	8.11e-53	1.83e-51
ENSG00000183762	582.96	1.26036	0.129856	9.70579	2.85e-22	2.67e-21
ENSG00000062716	10926.4	1.26003	0.0550588	22.8852	6.52e-116	3.75e-114
ENSG00000119185	1211.21	1.25961	0.0938911	13.4157	4.9e-41	8.37e-40
ENSG00000102265	881.936	1.25862	0.112634	11.1744	5.44e-29	6.49e-28
ENSG00000014824	3130.57	1.25745	0.0703098	17.8844	1.56e-71	4.95e-70
ENSG00000137942	2989.12	1.25439	0.0675709	18.564	6.28e-77	2.18e-75
ENSG00000097021	1122.78	1.25408	0.102459	12.2398	1.91e-34	2.7e-33
ENSG00000218739	1283.34	1.25352	0.0943032	13.2924	2.56e-40	4.3e-39
ENSG00000129925	2602.11	1.25154	0.0830494	15.0698	2.56e-51	5.55e-50
ENSG00000203827	41.1911	1.2511	0.477897	2.61793	0.00884645	0.0200995
ENSG00000115339	2140.29	1.2511	0.0758953	16.4846	4.74e-61	1.26e-59
ENSG00000182264	59.451	1.2508	0.383087	3.26505	0.00109445	0.00287111
ENSG00000171603	6743.32	1.25048	0.0572316	21.8494	7.87e-106	4.1e-104
ENSG00000135835	72.3784	1.2495	0.350965	3.56019	0.000370591	0.001038
ENSG00000202337	22.1053	1.24882	0.625301	1.99715	0.0458087	0.0885709
ENSG00000238105	689.379	1.24856	0.119916	10.4119	2.19e-25	2.3e-24
ENSG00000114529	36.7745	1.24789	0.486438	2.56536	0.010307	0.0231588
ENSG00000079785	3699.42	1.24696	0.064882	19.2189	2.57e-82	9.63e-81
ENSG00000076356	230.577	1.24637	0.197343	6.31575	2.69e-10	1.32e-09
ENSG00000123191	361.616	1.24549	0.167884	7.41879	1.18e-13	7.28e-13
ENSG00000115091	6367.26	1.24524	0.0570548	21.8254	1.33e-105	6.91e-104
ENSG00000214110	614.575	1.24152	0.126774	9.79319	1.2e-22	1.15e-21
ENSG00000104081	1606.29	1.23961	0.0842841	14.7075	5.77e-49	1.2e-47
ENSG00000261614	140.788	1.23926	0.252074	4.91623	8.82e-07	3.27e-06
ENSG00000100994	9640.15	1.23919	0.0587503	21.0925	9.31e-99	4.42e-97
ENSG00000167470	5005.23	1.23779	0.0662647	18.6794	7.28e-78	2.58e-76
ENSG00000258645	97.8809	1.23774	0.324132	3.81863	0.000134196	0.000395168
ENSG00000158470	1572.74	1.23657	0.0839799	14.7246	4.48e-49	9.32e-48
ENSG00000176834	1319.73	1.2336	0.0898469	13.73	6.72e-43	1.21e-41
ENSG00000114812	148.875	1.23161	0.243953	5.04856	4.45e-07	1.69e-06
ENSG00000111684	606.831	1.23113	0.125956	9.7743	1.45e-22	1.38e-21
ENSG00000068878	2804.92	1.23027	0.0691989	17.7788	1.03e-70	3.23e-69
ENSG00000129515	9287.92	1.22871	0.0575161	21.3628	2.96e-101	1.47e-99
ENSG00000147224	534.018	1.2278	0.13339	9.20463	3.43e-20	2.93e-19
ENSG00000168140	1144.56	1.22778	0.108261	11.341	8.22e-30	1.01e-28
ENSG00000196967	124.558	1.22709	0.269154	4.55908	5.14e-06	1.78e-05
ENSG00000163249	457.835	1.2266	0.145873	8.4087	4.15e-17	3.05e-16
ENSG00000185246	4466.55	1.2246	0.071681	17.084	1.95e-65	5.6e-64
ENSG00000169972	454.791	1.22433	0.151585	8.07684	6.65e-16	4.59e-15
ENSG00000125731	493.362	1.22349	0.137953	8.8689	7.39e-19	5.97e-18
ENSG00000166311	451.936	1.22265	0.153775	7.95094	1.85e-15	1.25e-14
ENSG00000134333	18579.1	1.2224	0.0467698	26.1366	1.4e-150	1.16e-148
ENSG00000071246	301.177	1.22228	0.180809	6.76007	1.38e-11	7.44e-11
ENSG00000111640	60543.4	1.22196	0.0512522	23.842	1.23e-125	7.87e-124
ENSG00000092621	18720.9	1.22181	0.0514469	23.749	1.12e-124	7.13e-123
ENSG00000196220	105.623	1.22157	0.293228	4.16595	3.1e-05	9.83e-05
ENSG00000227203	105.147	1.22146	0.289868	4.21384	2.51e-05	8.05e-05
ENSG00000148411	1593.83	1.22144	0.0877024	13.9271	4.34e-44	8.05e-43
ENSG00000179277	130.186	1.22106	0.266296	4.58534	4.53e-06	1.58e-05
ENSG00000196498	7931.8	1.22071	0.070735	17.2575	9.82e-67	2.88e-65
ENSG00000133812	821.577	1.22064	0.115266	10.5897	3.33e-26	3.59e-25
ENSG00000151773	321.645	1.22043	0.177074	6.89223	5.49e-12	3.03e-11
ENSG00000234130	71.2934	1.22013	0.358628	3.40222	0.000668418	0.0018093
ENSG00000117676	1272.87	1.21993	0.0922642	13.2222	6.53e-40	1.09e-38
ENSG00000198624	102.687	1.21938	0.301951	4.03835	5.38e-05	0.000165983
ENSG00000187790	1252.07	1.21921	0.0982472	12.4096	2.32e-35	3.41e-34
ENSG00000106078	1042.72	1.21895	0.0997544	12.2195	2.45e-34	3.46e-33
ENSG00000198753	1035.58	1.21843	0.108363	11.244	2.48e-29	2.99e-28
ENSG00000198807	1716.68	1.21815	0.0819338	14.8676	5.35e-50	1.13e-48
ENSG00000065559	1030.94	1.21724	0.101003	12.0514	1.91e-33	2.62e-32
ENSG00000204323	43.1318	1.21577	0.449857	2.70256	0.00688069	0.0159242
ENSG00000184432	6286.68	1.21524	0.0553017	21.9748	5.02e-107	2.65e-105
ENSG00000123989	2251.78	1.21355	0.0893235	13.586	4.85e-42	8.5e-41
ENSG00000146416	1190.15	1.212	0.0957866	12.6531	1.08e-36	1.64e-35
ENSG00000106524	422.912	1.21199	0.149126	8.12726	4.39e-16	3.06e-15
ENSG00000125744	235.081	1.21197	0.197201	6.14589	7.95e-10	3.78e-09
ENSG00000150337	25.1437	1.21194	0.611197	1.98289	0.0473797	0.091313
ENSG00000076716	529.155	1.21071	0.137159	8.82707	1.07e-18	8.62e-18
ENSG00000114861	1567.77	1.20859	0.0854677	14.1409	2.13e-45	4.07e-44
ENSG00000138031	1046.03	1.20837	0.108615	11.1252	9.46e-29	1.12e-27
ENSG00000139644	29148.3	1.20773	0.0433208	27.8787	4.84e-171	4.69e-169
ENSG00000064687	320.863	1.20744	0.17045	7.08384	1.4e-12	8.08e-12
ENSG00000225462	55.5737	1.20633	0.411476	2.93171	0.00337104	0.00821342
ENSG00000109133	2457.85	1.2062	0.0770214	15.6605	2.82e-55	6.71e-54
ENSG00000063660	361.908	1.20522	0.160295	7.51877	5.53e-14	3.45e-13
ENSG00000184232	137.956	1.20359	0.252793	4.76118	1.92e-06	6.92e-06
ENSG00000060138	4756.55	1.2029	0.0602324	19.971	9.84e-89	4.02e-87
ENSG00000130517	638.338	1.20289	0.123035	9.77677	1.42e-22	1.35e-21
ENSG00000010278	6285.79	1.20131	0.0555797	21.6141	1.32e-103	6.68e-102
ENSG00000115758	5402.29	1.20072	0.0562551	21.3443	4.41e-101	2.18e-99
ENSG00000110169	121.604	1.2006	0.270201	4.44335	8.86e-06	3e-05
ENSG00000152413	2013.55	1.20048	0.081515	14.7271	4.32e-49	8.99e-48
ENSG00000115652	1057.38	1.20046	0.100424	11.954	6.19e-33	8.35e-32
ENSG00000120694	6085.97	1.19995	0.0589668	20.3496	4.68e-92	2e-90
ENSG00000213782	31.0199	1.19906	0.529938	2.26264	0.0236579	0.0490673
ENSG00000067191	184.995	1.19812	0.223167	5.36873	7.93e-08	3.22e-07
ENSG00000170502	1314.95	1.19639	0.0908995	13.1617	1.46e-39	2.4e-38
ENSG00000152518	4040.48	1.19585	0.0651189	18.3642	2.54e-75	8.58e-74
ENSG00000196950	1660.91	1.19483	0.0936741	12.7552	2.92e-37	4.53e-36
ENSG00000122971	192.011	1.19443	0.215627	5.53935	3.04e-08	1.27e-07
ENSG00000154914	366.331	1.19387	0.163778	7.28954	3.11e-13	1.86e-12
ENSG00000060140	60.2136	1.19325	0.40286	2.96194	0.00305705	0.00750536
ENSG00000182919	666.705	1.19175	0.121217	9.83152	8.24e-23	7.9e-22
ENSG00000146038	514.116	1.191	0.135325	8.80105	1.36e-18	1.08e-17
ENSG00000115159	3216.4	1.19096	0.0760811	15.6539	3.13e-55	7.45e-54
ENSG00000105538	81.1539	1.19029	0.335217	3.5508	0.000384062	0.00107391
ENSG00000170100	257.105	1.1876	0.18722	6.34334	2.25e-10	1.11e-09
ENSG00000115541	525.743	1.18707	0.139735	8.49517	1.98e-17	1.49e-16
ENSG00000129493	1346.1	1.18503	0.0948826	12.4895	8.52e-36	1.27e-34
ENSG00000159842	2847.03	1.18481	0.0708518	16.7224	9e-63	2.47e-61
ENSG00000171962	93.1967	1.18436	0.309779	3.82324	0.000131708	0.000388425
ENSG00000180776	2117.2	1.18407	0.0754578	15.6919	1.72e-55	4.12e-54
ENSG00000128604	269.136	1.18307	0.184555	6.41037	1.45e-10	7.28e-10
ENSG00000196781	1769.98	1.18267	0.0890619	13.2792	3.06e-40	5.13e-39
ENSG00000129566	1514.16	1.18147	0.0856661	13.7915	2.87e-43	5.21e-42
ENSG00000181104	94.6818	1.18042	0.303299	3.89194	9.94e-05	0.000297032
ENSG00000246922	45.4829	1.17929	0.443012	2.66198	0.00776833	0.0178061
ENSG00000112293	25.4272	1.17877	0.586725	2.00907	0.0445301	0.0862771
ENSG00000109756	1265.14	1.17763	0.0914626	12.8755	6.18e-38	9.78e-37
ENSG00000146904	797.091	1.17656	0.114482	10.2772	8.93e-25	9.15e-24
ENSG00000122550	332.134	1.17543	0.170211	6.90574	4.99e-12	2.77e-11
ENSG00000239521	136.007	1.17496	0.254198	4.62221	3.8e-06	1.33e-05
ENSG00000103066	468.721	1.17395	0.14282	8.21983	2.04e-16	1.45e-15
ENSG00000163728	954.583	1.17374	0.112031	10.4769	1.1e-25	1.17e-24
ENSG00000153029	602.39	1.17229	0.128062	9.1541	5.48e-20	4.64e-19
ENSG00000131018	85.7458	1.17104	0.321754	3.63957	0.000273097	0.00077563
ENSG00000120690	4599.61	1.17022	0.0613411	19.0773	3.9e-81	1.44e-79
ENSG00000151353	1511.12	1.17021	0.0859173	13.6202	3.04e-42	5.37e-41
ENSG00000088448	1130.39	1.16916	0.0958215	12.2014	3.05e-34	4.3e-33
ENSG00000121210	2433.33	1.16893	0.0711735	16.4236	1.3e-60	3.41e-59
ENSG00000118939	56.9676	1.16858	0.392865	2.9745	0.0029347	0.00722475
ENSG00000109680	72.7327	1.16814	0.346654	3.36975	0.000752371	0.00201978
ENSG00000147324	1203.73	1.16742	0.0956449	12.2057	2.9e-34	4.08e-33
ENSG00000128298	29.865	1.16732	0.536432	2.17608	0.0295492	0.0599737
ENSG00000085733	13495.6	1.16579	0.0511353	22.7981	4.79e-115	2.73e-113
ENSG00000142192	11145.9	1.16578	0.0507234	22.9832	6.87e-117	3.97e-115
ENSG00000180346	544.052	1.16557	0.133292	8.74446	2.24e-18	1.76e-17
ENSG00000197442	1030.63	1.16528	0.102159	11.4066	3.88e-30	4.81e-29
ENSG00000174238	1895.13	1.16477	0.0794658	14.6575	1.21e-48	2.48e-47
ENSG00000131459	158.418	1.16395	0.239295	4.86407	1.15e-06	4.22e-06
ENSG00000102531	2387.33	1.16308	0.0818312	14.2131	7.6e-46	1.47e-44
ENSG00000151135	1625.08	1.1611	0.0895807	12.9615	2.02e-38	3.24e-37
ENSG00000204970	31.051	1.15886	0.530045	2.18634	0.0287909	0.0585562
ENSG00000135605	58.1181	1.15762	0.3931	2.94486	0.00323104	0.00789646
ENSG00000196526	1502.16	1.15703	0.0904747	12.7884	1.9e-37	2.97e-36
ENSG00000065717	924.263	1.15526	0.11185	10.3286	5.23e-25	5.39e-24
ENSG00000116141	140.395	1.15512	0.250887	4.60415	4.14e-06	1.45e-05
ENSG00000168743	3551.48	1.15487	0.0636523	18.1434	1.45e-73	4.77e-72
ENSG00000157800	1201.76	1.15457	0.093168	12.3923	2.88e-35	4.21e-34
ENSG00000152767	1622.18	1.15155	0.0847306	13.5907	4.54e-42	7.98e-41
ENSG00000050628	54.5351	1.15072	0.3984	2.88834	0.0038728	0.00933133
ENSG00000116883	73.9616	1.14986	0.345716	3.32603	0.000880931	0.00234269
ENSG00000136002	63.9567	1.14959	0.36936	3.11239	0.00185579	0.00470541
ENSG00000158941	3040	1.14922	0.0676691	16.983	1.1e-64	3.11e-63
ENSG00000149418	3412.67	1.14855	0.0680612	16.8753	6.84e-64	1.91e-62
ENSG00000170266	2456.75	1.14735	0.0755104	15.1946	3.84e-52	8.5e-51
ENSG00000147889	117.278	1.14693	0.272863	4.20332	2.63e-05	8.41e-05
ENSG00000080947	48.2584	1.14639	0.423525	2.70679	0.00679375	0.0157382
ENSG00000047346	4082.27	1.14604	0.0739282	15.5021	3.36e-54	7.83e-53
ENSG00000169499	480.899	1.14561	0.144613	7.92188	2.34e-15	1.58e-14
ENSG00000079482	551.964	1.14523	0.13265	8.63351	5.95e-18	4.6e-17
ENSG00000177156	3593.63	1.14425	0.063917	17.9021	1.14e-71	3.61e-70
ENSG00000154518	4246.87	1.14377	0.0615744	18.5753	5.09e-77	1.77e-75
ENSG00000136156	4202.35	1.14355	0.0702963	16.2676	1.68e-59	4.34e-58
ENSG00000162496	78.8144	1.14239	0.332407	3.43673	0.000588793	0.00160427
ENSG00000198727	157031	1.14215	0.0542671	21.0469	2.44e-98	1.15e-96
ENSG00000132432	1421.52	1.14211	0.0991116	11.5235	1e-30	1.27e-29
ENSG00000204084	453.986	1.14119	0.160642	7.1039	1.21e-12	7.01e-12
ENSG00000135097	805.302	1.14048	0.111969	10.1857	2.3e-24	2.32e-23
ENSG00000102753	2136.91	1.14017	0.0767655	14.8526	6.69e-50	1.41e-48
ENSG00000143933	13215.7	1.13968	0.0491704	23.1783	7.54e-119	4.48e-117
ENSG00000169016	533.75	1.1395	0.133256	8.55119	1.22e-17	9.25e-17
ENSG00000120254	4707.31	1.13857	0.0590506	19.2813	7.71e-83	2.9e-81
ENSG00000112379	4003.12	1.13769	0.0610912	18.6229	2.1e-77	7.34e-76
ENSG00000013375	1254.05	1.1373	0.0917004	12.4024	2.54e-35	3.72e-34
ENSG00000149179	713.231	1.13613	0.120192	9.45258	3.31e-21	2.96e-20
ENSG00000124214	5975.16	1.13475	0.0557937	20.3384	5.89e-92	2.51e-90
ENSG00000100902	1094.84	1.13397	0.111539	10.1666	2.79e-24	2.82e-23
ENSG00000077238	578.746	1.13334	0.133718	8.47557	2.34e-17	1.75e-16
ENSG00000244486	43.0438	1.13255	0.452379	2.50354	0.0122956	0.0271561
ENSG00000135111	205.629	1.13231	0.215668	5.25023	1.52e-07	6.03e-07
ENSG00000130653	365.722	1.13193	0.166726	6.78915	1.13e-11	6.1e-11
ENSG00000167508	1167.79	1.13184	0.101027	11.2034	3.92e-29	4.71e-28
ENSG00000198142	719.49	1.13157	0.116808	9.68747	3.41e-22	3.19e-21
ENSG00000225630	117.57	1.13131	0.274088	4.12753	3.67e-05	0.000115301
ENSG00000256673	27.0298	1.13007	0.565168	1.99953	0.045551	0.0881202
ENSG00000167705	41.966	1.12874	0.477905	2.36185	0.0181839	0.0386761
ENSG00000072778	6440.11	1.12855	0.0554091	20.3676	3.24e-92	1.4e-90
ENSG00000168005	660.062	1.12845	0.123391	9.14535	5.94e-20	5.01e-19
ENSG00000213371	49.1004	1.12826	0.424191	2.65979	0.00781887	0.017901
ENSG00000177706	654.007	1.12649	0.124549	9.04456	1.5e-19	1.25e-18
ENSG00000185386	134.994	1.12529	0.260092	4.3265	1.51e-05	4.98e-05
ENSG00000185420	431.077	1.12516	0.146967	7.65584	1.92e-14	1.23e-13
ENSG00000232267	42.2113	1.12502	0.457924	2.45679	0.0140186	0.0305877
ENSG00000198689	388.886	1.12411	0.153772	7.31023	2.67e-13	1.6e-12
ENSG00000116035	55.9467	1.124	0.394089	2.85216	0.00434237	0.0103779
ENSG00000120693	336.205	1.12265	0.166509	6.74227	1.56e-11	8.38e-11
ENSG00000121644	1861.43	1.12118	0.0805597	13.9174	4.97e-44	9.2e-43
ENSG00000106537	4450.36	1.12076	0.0607991	18.4339	7.02e-76	2.41e-74
ENSG00000146955	34.361	1.12065	0.509897	2.1978	0.0279633	0.0570835
ENSG00000145476	190.155	1.11885	0.21773	5.13868	2.77e-07	1.07e-06
ENSG00000106803	1426.11	1.11858	0.0893368	12.5209	5.74e-36	8.59e-35
ENSG00000104522	2209.28	1.11841	0.0748902	14.934	1.98e-50	4.21e-49
ENSG00000143819	361.574	1.11836	0.160806	6.95473	3.53e-12	1.98e-11
ENSG00000004399	566.503	1.11809	0.133536	8.373	5.62e-17	4.11e-16
ENSG00000154122	889.704	1.11806	0.107375	10.4126	2.17e-25	2.28e-24
ENSG00000174093	151.316	1.11754	0.244772	4.56565	4.98e-06	1.73e-05
ENSG00000114302	1373.86	1.1156	0.088118	12.6603	9.81e-37	1.5e-35
ENSG00000163754	2104.85	1.1156	0.07516	14.843	7.73e-50	1.63e-48
ENSG00000184009	87746.2	1.11557	0.0469584	23.7565	9.42e-125	5.99e-123
ENSG00000112237	2361.19	1.1146	0.0815571	13.6665	1.61e-42	2.87e-41
ENSG00000182379	804.829	1.11406	0.118255	9.42082	4.48e-21	3.98e-20
ENSG00000104635	2524.32	1.11375	0.0702866	15.8458	1.5e-56	3.69e-55
ENSG00000135862	3402.89	1.11338	0.0648066	17.18	3.75e-66	1.08e-64
ENSG00000181019	15695.2	1.11124	0.0456121	24.3628	4.24e-131	2.9e-129
ENSG00000184178	416.739	1.11007	0.148663	7.46704	8.2e-14	5.09e-13
ENSG00000071127	9377.75	1.11005	0.0525723	21.1147	5.82e-99	2.78e-97
ENSG00000235847	30.6537	1.1088	0.53451	2.07442	0.0380405	0.0750691
ENSG00000163346	1596.23	1.10852	0.0848442	13.0654	5.19e-39	8.42e-38
ENSG00000142657	5220.35	1.10835	0.0615662	18.0026	1.86e-72	5.97e-71
ENSG00000150403	1819.26	1.10809	0.0797244	13.8991	6.42e-44	1.19e-42
ENSG00000135540	709.085	1.10767	0.117786	9.40404	5.25e-21	4.66e-20
ENSG00000196233	1194.74	1.10722	0.0946659	11.6961	1.33e-31	1.73e-30
ENSG00000115310	4266.3	1.10592	0.0630373	17.5439	6.62e-69	2.02e-67
ENSG00000113391	1330.69	1.10526	0.0950367	11.6298	2.91e-31	3.72e-30
ENSG00000177685	2631.95	1.10476	0.0769704	14.353	1.02e-46	2.01e-45
ENSG00000156675	2242.25	1.10265	0.0738044	14.9402	1.8e-50	3.84e-49
ENSG00000171604	5455.97	1.10228	0.0636698	17.3125	3.79e-67	1.12e-65
ENSG00000115290	115.01	1.1015	0.30381	3.62563	0.00028826	0.000816864
ENSG00000145014	333.017	1.10133	0.165268	6.66392	2.67e-11	1.41e-10
ENSG00000108588	8216.19	1.10093	0.0544796	20.2081	8.31e-91	3.5e-89
ENSG00000104880	569.256	1.0989	0.130622	8.41285	4e-17	2.95e-16
ENSG00000168209	6489.91	1.09845	0.0542866	20.2343	4.89e-91	2.07e-89
ENSG00000100065	348.727	1.09662	0.163007	6.72742	1.73e-11	9.23e-11
ENSG00000183570	78.7167	1.09615	0.331202	3.30962	0.00093424	0.00247375
ENSG00000108654	33764.4	1.09555	0.0464265	23.5975	4.09e-123	2.54e-121
ENSG00000182400	4473.42	1.0953	0.0679477	16.1198	1.85e-58	4.7e-57
ENSG00000149782	2302.99	1.09433	0.0843673	12.971	1.79e-38	2.86e-37
ENSG00000159216	3124.4	1.09427	0.0719098	15.2173	2.72e-52	6.04e-51
ENSG00000169251	9452.61	1.09399	0.0586822	18.6426	1.45e-77	5.1e-76
ENSG00000109944	146.625	1.09366	0.249888	4.3766	1.21e-05	4.01e-05
ENSG00000186998	108.275	1.09354	0.289006	3.7838	0.000154451	0.000451476
ENSG00000188158	267.425	1.09345	0.183199	5.96863	2.39e-09	1.1e-08
ENSG00000167861	4931.27	1.09286	0.0713972	15.3068	6.89e-53	1.56e-51
ENSG00000215414	938.448	1.09252	0.105365	10.3689	3.44e-25	3.56e-24
ENSG00000160256	1106.06	1.09151	0.0997159	10.9462	6.93e-28	7.91e-27
ENSG00000127995	1128.15	1.09095	0.110207	9.89909	4.2e-23	4.08e-22
ENSG00000197134	133.53	1.09016	0.260539	4.18425	2.86e-05	9.11e-05
ENSG00000170921	4582.57	1.08942	0.0602812	18.0722	5.28e-73	1.72e-71
ENSG00000134313	2480.34	1.08875	0.0706595	15.4083	1.44e-53	3.3e-52
ENSG00000128965	956.493	1.08866	0.106738	10.1994	1.99e-24	2.02e-23
ENSG00000081818	42.4566	1.08601	0.460172	2.36	0.0182749	0.0388311
ENSG00000120889	3086.49	1.08587	0.0681806	15.9264	4.16e-57	1.03e-55
ENSG00000077585	273.05	1.0858	0.182973	5.93422	2.95e-09	1.35e-08
ENSG00000204178	773.045	1.08482	0.112726	9.62348	6.36e-22	5.89e-21
ENSG00000087191	5496.17	1.08382	0.0581791	18.6291	1.87e-77	6.55e-76
ENSG00000138386	925.449	1.08364	0.107685	10.0631	8.04e-24	7.96e-23
ENSG00000133872	4131.08	1.08323	0.0608276	17.8082	6.1e-71	1.92e-69
ENSG00000099864	676.739	1.08219	0.121451	8.91054	5.08e-19	4.14e-18
ENSG00000171219	2330.43	1.0811	0.074214	14.5673	4.53e-48	9.25e-47
ENSG00000076321	900.342	1.08068	0.10524	10.2687	9.75e-25	9.98e-24
ENSG00000119801	1395.52	1.07863	0.0876924	12.3002	9.04e-35	1.3e-33
ENSG00000076641	30.218	1.07809	0.534103	2.01851	0.0435378	0.0845831
ENSG00000161642	1181.17	1.07702	0.102157	10.5428	5.48e-26	5.88e-25
ENSG00000128596	86.345	1.07701	0.31613	3.40684	0.000657192	0.00178138
ENSG00000062598	960.405	1.07688	0.103601	10.3945	2.63e-25	2.75e-24
ENSG00000148143	513.469	1.07402	0.135927	7.90147	2.76e-15	1.85e-14
ENSG00000196275	46.6586	1.07372	0.450455	2.38364	0.0171424	0.036682
ENSG00000052795	269.085	1.07245	0.182377	5.88038	4.09e-09	1.85e-08
ENSG00000176018	2039.15	1.07206	0.0922119	11.626	3.04e-31	3.89e-30
ENSG00000162545	649.378	1.07193	0.122069	8.78138	1.61e-18	1.28e-17
ENSG00000198763	89324.7	1.07159	0.0427576	25.0619	1.3e-138	9.52e-137
ENSG00000077044	1504.73	1.07102	0.0872769	12.2715	1.29e-34	1.84e-33
ENSG00000173273	2225.75	1.07002	0.0734773	14.5626	4.86e-48	9.89e-47
ENSG00000166689	1021.28	1.06998	0.105913	10.1024	5.39e-24	5.36e-23
ENSG00000167315	3405.74	1.06973	0.0666067	16.0604	4.84e-58	1.22e-56
ENSG00000122591	83.1129	1.069	0.329349	3.24581	0.00117118	0.00305749
ENSG00000234782	189.453	1.06886	0.217414	4.91623	8.82e-07	3.27e-06
ENSG00000131711	601.277	1.06772	0.126956	8.41011	4.1e-17	3.02e-16
ENSG00000188559	1170.4	1.06734	0.0942895	11.3198	1.05e-29	1.28e-28
ENSG00000166130	343.924	1.06727	0.167504	6.3716	1.87e-10	9.32e-10
ENSG00000181191	334.2	1.06706	0.168519	6.332	2.42e-10	1.19e-09
ENSG00000100345	18452.3	1.06698	0.0520326	20.5059	1.91e-93	8.33e-92
ENSG00000167695	458.436	1.06599	0.14494	7.35467	1.91e-13	1.16e-12
ENSG00000100422	793.259	1.06587	0.112462	9.47758	2.6e-21	2.34e-20
ENSG00000160226	269.981	1.06493	0.18376	5.79522	6.82e-09	3.03e-08
ENSG00000248626	30.4151	1.06171	0.533802	1.98897	0.0467049	0.0901416
ENSG00000145284	362.347	1.06156	0.161494	6.57335	4.92e-11	2.55e-10
ENSG00000205336	11610.1	1.06142	0.0583862	18.1793	7.53e-74	2.49e-72
ENSG00000106868	64.4622	1.06134	0.369677	2.87098	0.00409201	0.00981991
ENSG00000116871	1448.29	1.06122	0.0899271	11.8008	3.86e-32	5.08e-31
ENSG00000104714	465.557	1.06073	0.140986	7.52362	5.33e-14	3.33e-13
ENSG00000011566	1847.17	1.06005	0.0848033	12.5001	7.46e-36	1.11e-34
ENSG00000111667	2890.46	1.05833	0.0670003	15.7958	3.32e-56	8.1e-55
ENSG00000105409	75.0145	1.05779	0.341281	3.09946	0.00193874	0.00489686
ENSG00000162599	1811.67	1.05739	0.079013	13.3825	7.65e-41	1.3e-39
ENSG00000067208	357.057	1.0571	0.161636	6.53999	6.15e-11	3.17e-10
ENSG00000179899	30.3903	1.05674	0.530096	1.9935	0.0462072	0.0892772
ENSG00000012822	1257.73	1.05665	0.0914946	11.5488	7.49e-31	9.48e-30
ENSG00000080819	509.456	1.05663	0.136914	7.7175	1.19e-14	7.67e-14
ENSG00000197385	344.337	1.05535	0.166987	6.31993	2.62e-10	1.29e-09
ENSG00000100890	34.529	1.05485	0.517635	2.03783	0.0415674	0.0812539
ENSG00000165449	211.903	1.05368	0.2084	5.05606	4.28e-07	1.63e-06
ENSG00000244754	3309.29	1.05308	0.0726436	14.4965	1.27e-47	2.58e-46
ENSG00000116171	1777.5	1.05249	0.0846151	12.4385	1.61e-35	2.39e-34
ENSG00000167920	358.75	1.05247	0.159505	6.59837	4.16e-11	2.17e-10
ENSG00000165389	6547.13	1.05046	0.0657928	15.9661	2.2e-57	5.46e-56
ENSG00000115685	1543.65	1.04983	0.0849224	12.3622	4.18e-35	6.1e-34
ENSG00000147099	275.06	1.04963	0.188299	5.57429	2.49e-08	1.05e-07
ENSG00000175711	229.702	1.04931	0.198528	5.28547	1.25e-07	5.01e-07
ENSG00000143387	177.357	1.04908	0.224116	4.68095	2.86e-06	1.01e-05
ENSG00000115211	1519.67	1.049	0.0894073	11.7329	8.65e-32	1.13e-30
ENSG00000109016	467.241	1.04866	0.142435	7.36241	1.81e-13	1.09e-12
ENSG00000185112	146.472	1.04833	0.260301	4.0274	5.64e-05	0.000173182
ENSG00000111653	594.412	1.04822	0.129619	8.08694	6.12e-16	4.24e-15
ENSG00000136490	50.944	1.04762	0.411626	2.54507	0.0109254	0.024398
ENSG00000167081	645.111	1.04736	0.12144	8.62452	6.44e-18	4.96e-17
ENSG00000163636	28851.4	1.04686	0.0446652	23.438	1.75e-121	1.07e-119
ENSG00000136279	2160.03	1.04662	0.0807654	12.9588	2.1e-38	3.35e-37
ENSG00000164040	2487.03	1.04653	0.0809337	12.9307	3.02e-38	4.8e-37
ENSG00000135677	4957.67	1.04606	0.0570529	18.3349	4.36e-75	1.46e-73
ENSG00000185624	15354	1.04467	0.0551124	18.9553	4e-80	1.46e-78
ENSG00000084234	10955.9	1.04443	0.0500994	20.8472	1.61e-96	7.34e-95
ENSG00000034152	1444.26	1.04441	0.0869717	12.0086	3.2e-33	4.36e-32
ENSG00000115944	4251.89	1.04428	0.0646542	16.1518	1.1e-58	2.81e-57
ENSG00000143786	37.1128	1.04342	0.482927	2.16061	0.0307254	0.0620974
ENSG00000111424	1244.27	1.04326	0.0928411	11.237	2.68e-29	3.23e-28
ENSG00000172493	3026.26	1.04245	0.0667665	15.6134	5.9e-55	1.39e-53
ENSG00000198794	672.51	1.04125	0.12126	8.58686	8.94e-18	6.86e-17
ENSG00000167468	4689.7	1.04114	0.066579	15.6377	4.03e-55	9.54e-54
ENSG00000213462	646.232	1.03937	0.121809	8.53282	1.43e-17	1.08e-16
ENSG00000149212	559.023	1.03903	0.132912	7.81743	5.39e-15	3.55e-14
ENSG00000175866	1279.33	1.03885	0.0925442	11.2255	3.06e-29	3.68e-28
ENSG00000115762	3541.81	1.03841	0.0635231	16.3469	4.58e-60	1.19e-58
ENSG00000147234	35.0047	1.03834	0.507829	2.04466	0.0408882	0.0800353
ENSG00000111540	826.769	1.03774	0.114782	9.041	1.55e-19	1.29e-18
ENSG00000233369	54.9709	1.0377	0.398804	2.60203	0.00926747	0.0209852
ENSG00000117616	1256.55	1.03737	0.094874	10.9342	7.91e-28	9.01e-27
ENSG00000137267	43.4002	1.03624	0.446458	2.32103	0.0202852	0.0427147
ENSG00000146733	1840.3	1.03603	0.0787373	13.1581	1.53e-39	2.52e-38
ENSG00000115738	2596.23	1.03568	0.0704935	14.6918	7.27e-49	1.5e-47
ENSG00000168280	120.039	1.03552	0.269111	3.84792	0.000119127	0.000353015
ENSG00000228797	57.0144	1.03528	0.402962	2.56918	0.0101939	0.0229285
ENSG00000197122	911.91	1.03428	0.104194	9.92653	3.19e-23	3.11e-22
ENSG00000147533	1170.08	1.03423	0.0951174	10.8732	1.55e-27	1.75e-26
ENSG00000153140	1138.97	1.03375	0.109245	9.46269	3e-21	2.69e-20
ENSG00000104660	1321.49	1.03372	0.0935547	11.0494	2.21e-28	2.58e-27
ENSG00000182809	7347.61	1.03362	0.0678519	15.2335	2.12e-52	4.74e-51
ENSG00000134698	583.078	1.03232	0.130192	7.9292	2.21e-15	1.49e-14
ENSG00000214050	115.527	1.0323	0.280067	3.68591	0.000227885	0.00065274
ENSG00000104365	1542.43	1.03195	0.0840277	12.2811	1.14e-34	1.64e-33
ENSG00000169242	2058.8	1.03119	0.075262	13.7013	9.97e-43	1.78e-41
ENSG00000170522	1468.75	1.03086	0.0883039	11.674	1.73e-31	2.23e-30
ENSG00000241553	2565.97	1.02794	0.0743263	13.8301	1.68e-43	3.07e-42
ENSG00000153250	1586.9	1.02778	0.0868994	11.8272	2.82e-32	3.73e-31
ENSG00000101695	301.285	1.02724	0.175035	5.86874	4.39e-09	1.98e-08
ENSG00000131788	4773.31	1.02562	0.061137	16.7757	3.67e-63	1.01e-61
ENSG00000005238	302.514	1.02539	0.172699	5.93744	2.89e-09	1.32e-08
ENSG00000170439	84.8668	1.02339	0.332031	3.0822	0.00205475	0.00517694
ENSG00000112282	1840.79	1.02314	0.0827841	12.3592	4.35e-35	6.33e-34
ENSG00000185010	160.846	1.02271	0.233529	4.37937	1.19e-05	3.96e-05
ENSG00000233585	172.601	1.02227	0.232194	4.40264	1.07e-05	3.58e-05
ENSG00000065320	1003.71	1.02216	0.100655	10.1551	3.15e-24	3.16e-23
ENSG00000188735	801.365	1.0214	0.11135	9.17289	4.61e-20	3.91e-19
ENSG00000215482	72.1857	1.02129	0.348771	2.92826	0.0034087	0.00830143
ENSG00000141298	779.043	1.01909	0.111837	9.11229	8.07e-20	6.78e-19
ENSG00000184669	63.1846	1.01784	0.372578	2.73189	0.00629716	0.0146731
ENSG00000144655	563.435	1.01626	0.130316	7.79842	6.27e-15	4.11e-14
ENSG00000085491	5066.7	1.01599	0.0681572	14.9066	2.99e-50	6.33e-49
ENSG00000134014	1219.62	1.01453	0.0927011	10.9441	7.09e-28	8.08e-27
ENSG00000081923	2541.6	1.01418	0.0703351	14.4193	3.91e-47	7.79e-46
ENSG00000137414	1282.53	1.01313	0.0915227	11.0697	1.76e-28	2.06e-27
ENSG00000182621	702.37	1.01269	0.123105	8.22628	1.93e-16	1.38e-15
ENSG00000205323	49.6967	1.01223	0.416456	2.43058	0.0150749	0.0326969
ENSG00000138698	1155.17	1.01183	0.0953066	10.6166	2.49e-26	2.7e-25
ENSG00000121900	793.419	1.01112	0.11559	8.74748	2.18e-18	1.72e-17
ENSG00000138623	55.7475	1.01056	0.395279	2.55658	0.0105707	0.0236819
ENSG00000049759	453.08	1.00882	0.142649	7.07203	1.53e-12	8.77e-12
ENSG00000177666	2237.24	1.00845	0.0797856	12.6395	1.28e-36	1.94e-35
ENSG00000050820	2384.21	1.00802	0.0843433	11.9515	6.38e-33	8.6e-32
ENSG00000142627	229.225	1.00745	0.196591	5.12459	2.98e-07	1.15e-06
ENSG00000136143	1216.02	1.00735	0.0960386	10.489	9.71e-26	1.03e-24
ENSG00000109686	1924.01	1.00732	0.0798398	12.6167	1.71e-36	2.59e-35
ENSG00000111752	271.112	1.00662	0.181017	5.56094	2.68e-08	1.13e-07
ENSG00000161533	2187.54	1.00544	0.0742754	13.5366	9.5e-42	1.65e-40
ENSG00000084710	144.146	1.00345	0.246082	4.07769	4.55e-05	0.000141491
[truncated: 7 more rows]

## Sheet: Protein-coding_p<=0.05 FC<=0.5
Gene ID	baseMean	log2FoldChange	lfcSE	stat	pvalue	padj
ENSG00000107562	2110.16	-14.4481	1.44446	-10.0024	1.49e-23	1.46e-22
ENSG00000157303	1738.11	-14.168	1.44496	-9.80514	1.07e-22	1.02e-21
ENSG00000162891	1304.29	-13.754	1.4452	-9.51701	1.78e-21	1.62e-20
ENSG00000130303	3135.74	-13.5824	1.39823	-9.71398	2.63e-22	2.47e-21
ENSG00000111335	2141.09	-13.0325	1.39855	-9.31859	1.18e-20	1.03e-19
ENSG00000204740	650.16	-12.7498	1.44712	-8.81048	1.25e-18	9.94e-18
ENSG00000137959	610.499	-12.6592	1.44755	-8.74525	2.23e-18	1.75e-17
ENSG00000095627	482.127	-12.3184	1.44842	-8.5047	1.82e-17	1.37e-16
ENSG00000147955	413.593	-12.0971	1.44925	-8.34716	6.99e-17	5.1e-16
ENSG00000218336	374.904	-11.9555	1.4499	-8.24578	1.64e-16	1.17e-15
ENSG00000177465	345.182	-11.8359	1.45056	-8.15955	3.36e-16	2.36e-15
ENSG00000132530	932.496	-11.833	1.40004	-8.45196	2.86e-17	2.13e-16
ENSG00000163873	904.841	-11.7887	1.40034	-8.41845	3.81e-17	2.82e-16
ENSG00000165512	331.635	-11.7791	1.45143	-8.11552	4.84e-16	3.37e-15
ENSG00000171587	2478.93	-11.664	0.835863	-13.9545	2.95e-44	5.51e-43
ENSG00000172403	260.224	-11.429	1.45295	-7.86604	3.66e-15	2.43e-14
ENSG00000119917	642.44	-11.2959	1.40164	-8.05904	7.69e-16	5.3e-15
ENSG00000137628	2463.17	-11.2403	0.725425	-15.4948	3.76e-54	8.75e-53
ENSG00000102109	226.101	-11.2258	1.45418	-7.71964	1.17e-14	7.55e-14
ENSG00000180787	204.974	-11.0841	1.45534	-7.61618	2.61e-14	1.66e-13
ENSG00000152977	202.995	-11.0704	1.45542	-7.60632	2.82e-14	1.79e-13
ENSG00000141968	164.93	-10.7699	1.45904	-7.38154	1.56e-13	9.52e-13
ENSG00000180543	3435.2	-10.7193	0.513713	-20.8662	1.09e-96	4.98e-95
ENSG00000174963	155.238	-10.6831	1.45921	-7.32115	2.46e-13	1.48e-12
ENSG00000174080	151.39	-10.6469	1.45963	-7.29423	3e-13	1.8e-12
ENSG00000185507	803.128	-10.6226	1.02557	-10.3577	3.86e-25	4e-24
ENSG00000136573	139.76	-10.5322	1.46106	-7.20859	5.65e-13	3.33e-12
ENSG00000169181	136.859	-10.5007	1.46227	-7.18111	6.91e-13	4.05e-12
ENSG00000176485	134.623	-10.4773	1.46186	-7.16711	7.66e-13	4.48e-12
ENSG00000136574	132.063	-10.4505	1.46206	-7.14774	8.82e-13	5.15e-12
ENSG00000146938	130.556	-10.434	1.46237	-7.13499	9.68e-13	5.63e-12
ENSG00000185745	3166.86	-10.4334	0.485891	-21.4727	2.8e-102	1.4e-100
ENSG00000126709	6272.15	-10.4179	0.344206	-30.2666	3.16e-201	3.76e-199
ENSG00000166405	119.266	-10.3034	1.46409	-7.03745	1.96e-12	1.12e-11
ENSG00000185686	110.411	-10.1924	1.46616	-6.9518	3.61e-12	2.02e-11
ENSG00000215146	104.814	-10.1171	1.4669	-6.8969	5.32e-12	2.94e-11
ENSG00000178537	103.402	-10.097	1.46703	-6.88262	5.88e-12	3.24e-11
ENSG00000147402	100.763	-10.0601	1.46776	-6.85406	7.18e-12	3.94e-11
ENSG00000181381	1067.78	-10.0336	0.727522	-13.7914	2.87e-43	5.21e-42
ENSG00000041515	98.4395	-10.025	1.47003	-6.8196	9.13e-12	4.97e-11
ENSG00000165949	4960.61	-10.0014	0.337271	-29.6538	3.03e-193	3.45e-191
ENSG00000160703	262.001	-10.0008	1.40714	-7.10715	1.18e-12	6.86e-12
ENSG00000111331	4721.27	-9.93031	0.336332	-29.5253	1.36e-191	1.53e-189
ENSG00000135069	1484.12	-9.92325	0.594508	-16.6915	1.51e-62	4.13e-61
ENSG00000074410	4929.11	-9.9174	0.327599	-30.273	2.6e-201	3.11e-199
ENSG00000256870	90.0907	-9.89923	1.47162	-6.72676	1.73e-11	9.27e-11
ENSG00000109113	954.113	-9.87064	0.727699	-13.5642	6.53e-42	1.14e-40
ENSG00000185885	1184.41	-9.86014	0.651255	-15.1402	8.79e-52	1.94e-50
ENSG00000205413	235.998	-9.85056	1.40849	-6.99368	2.68e-12	1.51e-11
ENSG00000164129	86.7807	-9.84512	1.4724	-6.68645	2.29e-11	1.21e-10
ENSG00000141574	86.6061	-9.84208	1.47219	-6.68535	2.3e-11	1.22e-10
ENSG00000185306	77.3499	-9.67814	1.475	-6.56146	5.33e-11	2.75e-10
ENSG00000021645	75.9236	-9.65123	1.47562	-6.54045	6.13e-11	3.16e-10
ENSG00000182492	183.198	-9.48428	1.41135	-6.72002	1.82e-11	9.69e-11
ENSG00000186472	181.125	-9.46562	1.41111	-6.70792	1.97e-11	1.05e-10
ENSG00000205363	358.792	-9.4611	1.03131	-9.17383	4.56e-20	3.88e-19
ENSG00000148803	65.5362	-9.43828	1.48175	-6.3697	1.89e-10	9.42e-10
ENSG00000162892	2046.95	-9.38567	0.422653	-22.2066	2.97e-109	1.6e-107
ENSG00000164619	170.384	-9.37783	1.41214	-6.64086	3.12e-11	1.64e-10
ENSG00000149243	60.5539	-9.32605	1.48467	-6.28158	3.35e-10	1.64e-09
ENSG00000180178	162.649	-9.3125	1.41311	-6.59009	4.4e-11	2.29e-10
ENSG00000163053	148.45	-9.18112	1.41473	-6.48969	8.6e-11	4.38e-10
ENSG00000229689	54.62	-9.17702	1.48852	-6.16519	7.04e-10	3.36e-09
ENSG00000137965	431.69	-9.14176	0.844449	-10.8257	2.6e-27	2.91e-26
ENSG00000164687	53.3167	-9.14085	1.48962	-6.13635	8.44e-10	4e-09
ENSG00000181433	53.2478	-9.14007	1.48933	-6.13702	8.41e-10	3.99e-09
ENSG00000184194	50.9338	-9.07562	1.49119	-6.08616	1.16e-09	5.43e-09
ENSG00000132677	50.8403	-9.07242	1.49155	-6.08253	1.18e-09	5.55e-09
ENSG00000150594	49.2788	-9.02783	1.49278	-6.04766	1.47e-09	6.86e-09
ENSG00000058335	660.761	-9.01684	0.654701	-13.7725	3.73e-43	6.75e-42
ENSG00000139737	48.7943	-9.01358	1.49327	-6.03616	1.58e-09	7.35e-09
ENSG00000083454	47.4221	-8.97212	1.49485	-6.00201	1.95e-09	9.03e-09
ENSG00000132329	45.713	-8.91923	1.4967	-5.95927	2.53e-09	1.16e-08
ENSG00000178773	242.286	-8.89103	1.03588	-8.58311	9.23e-18	7.07e-17
ENSG00000242498	44.0162	-8.8657	1.49926	-5.91338	3.35e-09	1.53e-08
ENSG00000148344	42.9391	-8.83043	1.50183	-5.8798	4.11e-09	1.86e-08
ENSG00000105974	42.2136	-8.80484	1.50099	-5.86604	4.46e-09	2.01e-08
ENSG00000076706	42.1866	-8.80403	1.5011	-5.86507	4.49e-09	2.02e-08
ENSG00000226057	42.1054	-8.80161	1.50163	-5.86135	4.59e-09	2.07e-08
ENSG00000136883	562.245	-8.78463	0.656369	-13.3837	7.53e-41	1.28e-39
ENSG00000154654	41.5669	-8.78329	1.50287	-5.84434	5.09e-09	2.28e-08
ENSG00000197977	223.048	-8.77259	1.0373	-8.45714	2.74e-17	2.04e-16
ENSG00000204950	41.0037	-8.76181	1.50357	-5.82735	5.63e-09	2.51e-08
ENSG00000100842	109.667	-8.7403	1.4202	-6.15425	7.54e-10	3.59e-09
ENSG00000100234	109.077	-8.73572	1.42076	-6.14862	7.82e-10	3.72e-09
ENSG00000134595	40.2094	-8.73389	1.50418	-5.80642	6.38e-09	2.84e-08
ENSG00000119922	312.774	-8.6762	0.848419	-10.2263	1.51e-24	1.54e-23
ENSG00000242284	37.0863	-8.61833	1.50909	-5.71094	1.12e-08	4.9e-08
ENSG00000158246	296.19	-8.59395	0.848467	-10.1288	4.12e-24	4.11e-23
ENSG00000114450	591.292	-8.59183	0.6004	-14.3102	1.89e-46	3.69e-45
ENSG00000099998	36.1445	-8.58111	1.51065	-5.68041	1.34e-08	5.82e-08
ENSG00000221844	35.3649	-8.54867	1.51232	-5.65268	1.58e-08	6.81e-08
ENSG00000162645	34.9887	-8.53268	1.51425	-5.63493	1.75e-08	7.52e-08
ENSG00000147872	185.578	-8.50532	1.04014	-8.17706	2.91e-16	2.06e-15
ENSG00000221866	92.6203	-8.49905	1.425	-5.96425	2.46e-09	1.13e-08
ENSG00000185760	33.2919	-8.46228	1.51616	-5.5814	2.39e-08	1.01e-07
ENSG00000204710	31.6369	-8.38852	1.51986	-5.51927	3.4e-08	1.42e-07
ENSG00000196917	167.031	-8.3536	1.04162	-8.01979	1.06e-15	7.25e-15
ENSG00000138769	30.668	-8.34366	1.52223	-5.4812	4.22e-08	1.76e-07
ENSG00000167080	30.6827	-8.34284	1.52513	-5.47025	4.49e-08	1.86e-07
ENSG00000151224	30.2794	-8.3233	1.52841	-5.44572	5.16e-08	2.13e-07
ENSG00000164128	3985.68	-8.31373	0.214927	-38.6816	0	0
ENSG00000178726	161.409	-8.30789	1.04404	-7.95748	1.76e-15	1.19e-14
ENSG00000170425	79.5524	-8.27984	1.42945	-5.79232	6.94e-09	3.08e-08
ENSG00000171791	2752.84	-8.26961	0.253529	-32.618	2.28e-233	3.53e-231
ENSG00000143320	3446.25	-8.22869	0.224505	-36.6526	4.16e-294	1.02e-291
ENSG00000103485	149.483	-8.1931	1.04418	-7.84646	4.28e-15	2.83e-14
ENSG00000213988	27.6137	-8.19174	1.53117	-5.34998	8.8e-08	3.56e-07
ENSG00000211689	27.0211	-8.16118	1.53269	-5.32476	1.01e-07	4.07e-07
ENSG00000197956	2468.95	-8.15185	0.256868	-31.7356	5.03e-221	6.84e-219
ENSG00000163347	144.21	-8.14043	1.04501	-7.78979	6.71e-15	4.39e-14
ENSG00000119714	72.0446	-8.13601	1.43274	-5.67863	1.36e-08	5.88e-08
ENSG00000126947	26.4825	-8.13254	1.5348	-5.29877	1.17e-07	4.67e-07
ENSG00000170190	357.256	-8.12675	0.661725	-12.2812	1.14e-34	1.64e-33
ENSG00000164411	136.754	-8.06914	1.04777	-7.70127	1.35e-14	8.69e-14
ENSG00000144218	667.655	-8.06258	1.16224	-6.9371	4e-12	2.23e-11
ENSG00000133710	68.169	-8.05609	1.43471	-5.61513	1.96e-08	8.4e-08
ENSG00000090339	24.8816	-8.04194	1.54016	-5.22149	1.77e-07	7.01e-07
ENSG00000137573	725.345	-8.00852	0.447837	-17.8827	1.61e-71	5.1e-70
ENSG00000171954	65.4517	-7.99679	1.43691	-5.56525	2.62e-08	1.11e-07
ENSG00000102934	24.075	-7.99317	1.54536	-5.17238	2.31e-07	9.03e-07
ENSG00000196208	9555.01	-7.98232	0.130042	-61.3825	0	0
ENSG00000118137	23.6717	-7.9682	1.5496	-5.1421	2.72e-07	1.05e-06
ENSG00000132517	23.1602	-7.93685	1.55095	-5.1174	3.1e-07	1.19e-06
ENSG00000179083	22.9438	-7.92501	1.54813	-5.1191	3.07e-07	1.18e-06
ENSG00000170819	21.9478	-7.86124	1.55281	-5.06258	4.14e-07	1.58e-06
ENSG00000152137	4018.88	-7.85445	0.184811	-42.4998	0	0
ENSG00000183145	21.7462	-7.84758	1.55376	-5.05071	4.4e-07	1.68e-06
ENSG00000198914	21.5298	-7.83498	1.55852	-5.0272	4.98e-07	1.89e-06
ENSG00000034053	57.9955	-7.82243	1.44112	-5.42803	5.7e-08	2.34e-07
ENSG00000152661	57.7127	-7.81549	1.44129	-5.42258	5.87e-08	2.41e-07
ENSG00000156587	794.541	-7.79108	0.400198	-19.468	2.05e-84	7.87e-83
ENSG00000183778	278.511	-7.77047	0.666751	-11.6542	2.18e-31	2.8e-30
ENSG00000231240	20.4797	-7.76359	1.5685	-4.9497	7.43e-07	2.78e-06
ENSG00000204219	541.775	-7.72339	0.472129	-16.3587	3.77e-60	9.87e-59
ENSG00000092068	371.211	-7.69394	0.564579	-13.6278	2.74e-42	4.85e-41
ENSG00000137441	52.9744	-7.6851	1.44451	-5.3202	1.04e-07	4.17e-07
ENSG00000184860	52.1821	-7.66967	1.44588	-5.30449	1.13e-07	4.53e-07
ENSG00000183036	19.1223	-7.66174	1.56867	-4.88422	1.04e-06	3.83e-06
ENSG00000161570	51.3883	-7.63967	1.44566	-5.28456	1.26e-07	5.03e-07
ENSG00000168269	18.7583	-7.63523	1.57148	-4.85864	1.18e-06	4.34e-06
ENSG00000005073	18.6378	-7.62472	1.57182	-4.85089	1.23e-06	4.5e-06
ENSG00000133019	50.7268	-7.62231	1.44719	-5.26699	1.39e-07	5.52e-07
ENSG00000162551	18.5173	-7.61417	1.57566	-4.83236	1.35e-06	4.92e-06
ENSG00000104870	50.2841	-7.60862	1.44635	-5.26055	1.44e-07	5.71e-07
ENSG00000100599	18.3427	-7.59987	1.58023	-4.80934	1.51e-06	5.5e-06
ENSG00000142089	5594.59	-7.58394	0.151488	-50.063	0	0
ENSG00000165194	341.559	-7.57158	0.565325	-13.3933	6.61e-41	1.12e-39
ENSG00000106927	96.3966	-7.56426	1.05885	-7.14387	9.07e-13	5.29e-12
ENSG00000115468	2028.02	-7.56095	0.234164	-32.2892	9.92e-229	1.42e-226
ENSG00000106560	17.7894	-7.55879	1.57833	-4.78911	1.68e-06	6.07e-06
ENSG00000118156	48.5209	-7.55699	1.44818	-5.21825	1.81e-07	7.13e-07
ENSG00000010030	17.4132	-7.52682	1.58041	-4.76259	1.91e-06	6.87e-06
ENSG00000145808	422.187	-7.51831	0.499901	-15.0396	4.04e-51	8.72e-50
ENSG00000027869	16.9017	-7.48412	1.58431	-4.72389	2.31e-06	8.28e-06
ENSG00000140403	435.191	-7.4071	0.475997	-15.5612	1.33e-54	3.14e-53
ENSG00000149596	16.0139	-7.40537	1.59278	-4.64932	3.33e-06	1.17e-05
ENSG00000186732	15.9328	-7.39898	1.59258	-4.64592	3.39e-06	1.19e-05
ENSG00000258527	15.7705	-7.38608	1.59866	-4.62017	3.83e-06	1.34e-05
ENSG00000198910	426.604	-7.37714	0.477133	-15.4614	6.32e-54	1.46e-52
ENSG00000108679	2185.8	-7.35936	0.212676	-34.6036	2.23e-262	4.37e-260
ENSG00000233622	329.558	-7.33284	0.533607	-13.742	5.69e-43	1.02e-41
ENSG00000173157	14.9762	-7.31238	1.61199	-4.53623	5.73e-06	1.98e-05
ENSG00000166159	14.9368	-7.30624	1.60236	-4.55966	5.12e-06	1.78e-05
ENSG00000204049	14.8704	-7.29764	1.60645	-4.54271	5.55e-06	1.92e-05
ENSG00000162006	79.9277	-7.29273	1.06699	-6.83484	8.21e-12	4.48e-11
ENSG00000134202	1884.05	-7.29224	0.223742	-32.5922	5.28e-233	8.06e-231
ENSG00000159167	80.7746	-7.29087	1.06173	-6.86694	6.56e-12	3.61e-11
ENSG00000188820	14.627	-7.27687	1.60738	-4.52716	5.98e-06	2.06e-05
ENSG00000178685	1218.63	-7.26202	0.274345	-26.4704	2.12e-154	1.82e-152
ENSG00000198959	14.4524	-7.25871	1.60751	-4.51549	6.32e-06	2.17e-05
ENSG00000154930	155.614	-7.24535	0.753681	-9.61329	7.03e-22	6.48e-21
ENSG00000146166	14.2507	-7.23792	1.60949	-4.49704	6.89e-06	2.36e-05
ENSG00000187608	3905.34	-7.20851	0.156463	-46.0716	0	0
ENSG00000077942	75.219	-7.19511	1.06945	-6.72787	1.72e-11	9.21e-11
ENSG00000163823	13.5646	-7.1662	1.61792	-4.42926	9.46e-06	3.19e-05
ENSG00000137558	13.0261	-7.10853	1.62447	-4.37592	1.21e-05	4.02e-05
ENSG00000169129	1446.07	-7.10796	0.240164	-29.5963	1.67e-192	1.88e-190
ENSG00000260284	12.972	-7.1033	1.62625	-4.36791	1.25e-05	4.16e-05
ENSG00000111186	12.9056	-7.09339	1.62883	-4.35491	1.33e-05	4.4e-05
ENSG00000227755	12.7433	-7.07747	1.62901	-4.34464	1.4e-05	4.6e-05
ENSG00000111344	69.1478	-7.06356	1.06842	-6.61121	3.81e-11	1.99e-10
ENSG00000135114	232.994	-7.02005	0.574495	-12.2195	2.45e-34	3.46e-33
ENSG00000173210	263.727	-7.00983	0.53875	-13.0113	1.06e-38	1.7e-37
ENSG00000170542	11.8285	-6.96926	1.64183	-4.2448	2.19e-05	7.06e-05
ENSG00000184371	32.2242	-6.96119	1.47453	-4.72094	2.35e-06	8.4e-06
ENSG00000050555	11.6809	-6.94966	1.64666	-4.22045	2.44e-05	7.83e-05
ENSG00000089127	725.015	-6.94188	0.320261	-21.6757	3.48e-104	1.77e-102
ENSG00000112343	31.486	-6.93759	1.47733	-4.69603	2.65e-06	9.45e-06
ENSG00000132554	31.6856	-6.93683	1.47683	-4.69711	2.64e-06	9.4e-06
ENSG00000161267	470.155	-6.93343	0.394873	-17.5586	5.11e-69	1.56e-67
ENSG00000231431	11.4916	-6.9291	1.65039	-4.19845	2.69e-05	8.58e-05
ENSG00000259836	11.4793	-6.92389	1.65277	-4.18927	2.8e-05	8.91e-05
ENSG00000211695	11.3711	-6.91194	1.64956	-4.19017	2.79e-05	8.88e-05
ENSG00000094755	212.524	-6.89006	0.577509	-11.9307	8.19e-33	1.1e-31
ENSG00000128274	393.779	-6.88997	0.425625	-16.1879	6.14e-59	1.57e-57
ENSG00000184809	30.0867	-6.87138	1.4816	-4.6378	3.52e-06	1.24e-05
ENSG00000126010	29.9785	-6.86678	1.48079	-4.63723	3.53e-06	1.24e-05
ENSG00000186603	354.462	-6.849	0.442291	-15.4853	4.36e-54	1.01e-52
ENSG00000117407	58.7579	-6.82571	1.076	-6.34361	2.24e-10	1.11e-09
ENSG00000166407	112.136	-6.78075	0.768404	-8.82445	1.1e-18	8.82e-18
ENSG00000168907	28.3092	-6.7708	1.48334	-4.56457	5.01e-06	1.74e-05
ENSG00000236431	10.2546	-6.76119	1.67549	-4.03535	5.45e-05	0.000167833
ENSG00000130487	10.2276	-6.75785	1.67405	-4.03683	5.42e-05	0.000166968
ENSG00000186115	10.0259	-6.72839	1.68182	-4.00065	6.32e-05	0.00019299
ENSG00000102001	26.8972	-6.70903	1.49059	-4.50092	6.77e-06	2.32e-05
ENSG00000178695	9.78247	-6.6974	1.68681	-3.97044	7.17e-05	0.000217933
ENSG00000214652	9.77018	-6.6913	1.68646	-3.96767	7.26e-05	0.000220294
ENSG00000186439	9.74312	-6.68779	1.6849	-3.96925	7.21e-05	0.000218932
ENSG00000168843	9.51442	-6.65325	1.69144	-3.93348	8.37e-05	0.000252237
ENSG00000124343	9.43327	-6.64245	1.68937	-3.93191	8.43e-05	0.000253784
ENSG00000179314	9.40622	-6.63884	1.68998	-3.92835	8.55e-05	0.000257433
ENSG00000226945	128.2	-6.62967	0.688723	-9.62603	6.21e-22	5.75e-21
ENSG00000143631	9.23162	-6.61047	1.69579	-3.89816	9.69e-05	0.000289899
ENSG00000108771	123.378	-6.57488	0.689983	-9.52905	1.59e-21	1.44e-20
ENSG00000164342	8.92177	-6.5626	1.70257	-3.85453	0.000115953	0.000344133
ENSG00000179455	8.89472	-6.55878	1.70408	-3.84888	0.000118658	0.000351822
ENSG00000157833	24.1381	-6.55263	1.50004	-4.3683	1.25e-05	4.16e-05
ENSG00000138411	214.106	-6.53071	0.516185	-12.6519	1.09e-36	1.67e-35
ENSG00000136840	93.9165	-6.51655	0.7765	-8.39221	4.77e-17	3.5e-16
ENSG00000006555	8.59962	-6.5062	1.72352	-3.77495	0.000160041	0.000466611
ENSG00000152213	8.59962	-6.5062	1.72352	-3.77495	0.000160041	0.000466611
ENSG00000149131	8.37092	-6.46698	1.73333	-3.73095	0.000190758	0.000551163
ENSG00000203401	22.7118	-6.46397	1.50629	-4.29131	1.78e-05	5.8e-05
ENSG00000205669	8.28977	-6.45456	1.72461	-3.74262	0.000182111	0.000527314
ENSG00000198797	66.8811	-6.45118	0.902784	-7.14588	8.94e-13	5.22e-12
ENSG00000164761	8.26272	-6.45044	1.72342	-3.74282	0.00018197	0.000526975
ENSG00000082482	66.9234	-6.44034	0.896182	-7.18642	6.65e-13	3.9e-12
ENSG00000198681	7.95287	-6.39685	1.73205	-3.69323	0.00022142	0.00063583
ENSG00000164741	604.704	-6.38954	0.298199	-21.4271	7.46e-102	3.71e-100
ENSG00000156711	1053.01	-6.37984	0.226333	-28.1879	8.23e-175	8.19e-173
ENSG00000115267	1259.06	-6.37246	0.206468	-30.8642	3.61e-209	4.49e-207
ENSG00000186086	7.83237	-6.37201	1.74314	-3.65548	0.000256699	0.000731569
ENSG00000121966	21.5122	-6.3701	1.51619	-4.20139	2.65e-05	8.48e-05
ENSG00000171631	210.362	-6.34255	0.494061	-12.8376	1.01e-37	1.59e-36
ENSG00000172716	7.64301	-6.34116	1.74756	-3.62857	0.000284996	0.000807826
ENSG00000184574	7.64301	-6.34116	1.74756	-3.62857	0.000284996	0.000807826
ENSG00000228966	7.64301	-6.34116	1.74756	-3.62857	0.000284996	0.000807826
ENSG00000173335	7.54957	-6.31983	1.74903	-3.61335	0.00030227	0.000854538
ENSG00000165863	20.5034	-6.31808	1.52362	-4.14676	3.37e-05	0.000106454
ENSG00000163879	143.168	-6.31555	0.591514	-10.6769	1.31e-26	1.43e-25
ENSG00000130775	20.5851	-6.3034	1.51436	-4.16243	3.15e-05	9.97e-05
ENSG00000143556	7.41431	-6.29708	1.75499	-3.5881	0.0003331	0.000938123
ENSG00000220008	7.38726	-6.29246	1.75935	-3.57659	0.000348106	0.000978463
ENSG00000168405	100.312	-6.28492	0.703496	-8.93384	4.11e-19	3.37e-18
ENSG00000128510	7.34792	-6.27977	1.76171	-3.56458	0.00036444	0.00102197
ENSG00000186891	7.32087	-6.27509	1.75927	-3.56688	0.000361257	0.00101357
ENSG00000196350	7.26677	-6.26574	1.75747	-3.56521	0.000363564	0.00101978
ENSG00000157502	7.18561	-6.25162	1.76303	-3.54595	0.000391195	0.00109244
ENSG00000024422	371.607	-6.23808	0.361325	-17.2645	8.71e-67	2.56e-65
ENSG00000140853	114.014	-6.20596	0.643552	-9.64329	5.25e-22	4.88e-21
ENSG00000165511	6.87576	-6.18981	1.78709	-3.46362	0.00053295	0.00146305
ENSG00000243064	6.87576	-6.18981	1.78709	-3.46362	0.00053295	0.00146305
ENSG00000179111	18.755	-6.18661	1.52855	-4.04737	5.18e-05	0.000160041
ENSG00000196092	75.5722	-6.18345	0.783829	-7.88876	3.05e-15	2.04e-14
ENSG00000251348	18.6738	-6.18121	1.53116	-4.03696	5.41e-05	0.000166901
ENSG00000132688	55.0969	-6.16814	0.91568	-6.73613	1.63e-11	8.72e-11
ENSG00000163485	739.294	-6.16805	0.252732	-24.4055	1.49e-131	1.03e-129
ENSG00000177409	6.70116	-6.15106	1.78464	-3.44667	0.00056755	0.00155071
ENSG00000254349	6.68887	-6.14239	1.80805	-3.39725	0.000680671	0.00184062
ENSG00000267736	54.7585	-6.13565	0.907247	-6.76293	1.35e-11	7.3e-11
ENSG00000132274	36.1776	-6.12917	1.11252	-5.50926	3.6e-08	1.5e-07
ENSG00000137462	6.44541	-6.09538	1.79898	-3.38824	0.000703434	0.00189764
ENSG00000268696	6.39131	-6.08467	1.8125	-3.35706	0.00078777	0.00210797
ENSG00000119673	139.693	-6.08161	0.559628	-10.8672	1.65e-27	1.86e-26
ENSG00000084628	105.26	-6.07817	0.648349	-9.37484	6.93e-21	6.1e-20
ENSG00000166509	6.31016	-6.06807	1.84763	-3.28425	0.00102253	0.00269296
ENSG00000176907	6.28311	-6.06235	1.86523	-3.25019	0.00115326	0.00301437
ENSG00000130475	452.226	-6.06005	0.886444	-6.83637	8.12e-12	4.44e-11
ENSG00000260153	6.29786	-6.05929	1.80165	-3.36319	0.000770477	0.00206349
ENSG00000184988	51.3275	-6.05294	0.914404	-6.61955	3.6e-11	1.89e-10
ENSG00000196440	6.24376	-6.04844	1.8053	-3.35038	0.000807021	0.00215546
ENSG00000150893	3092.86	-6.04707	0.124698	-48.4936	0	0
ENSG00000128422	6.16261	-6.03189	1.82235	-3.30995	0.000933115	0.00247156
ENSG00000156689	6.16261	-6.03189	1.82235	-3.30995	0.000933115	0.00247156
ENSG00000138356	16.7901	-6.02599	1.54393	-3.90301	9.5e-05	0.000284545
ENSG00000101180	6.15032	-6.02235	1.82252	-3.30442	0.000951737	0.00251637
ENSG00000166828	16.7237	-6.01816	1.54399	-3.89779	9.71e-05	0.000290265
ENSG00000180176	82.8376	-6.00285	0.712544	-8.42453	3.62e-17	2.68e-16
ENSG00000133640	6.04211	-5.99989	1.81515	-3.30546	0.000948216	0.00250798
ENSG00000222040	5.98801	-5.98858	1.82079	-3.28899	0.00100546	0.00265157
ENSG00000214872	5.89457	-5.96135	1.83463	-3.24934	0.00115672	0.00302231
ENSG00000132915	16.2791	-5.95686	1.54417	-3.85763	0.00011449	0.000340024
ENSG00000186529	5.86752	-5.9555	1.83101	-3.25259	0.0011436	0.00299203
ENSG00000169946	5.81341	-5.94381	1.82878	-3.25016	0.00115341	0.0030144
ENSG00000196155	1470.67	-5.93207	0.170379	-34.817	1.35e-265	2.71e-263
ENSG00000226907	5.73226	-5.92612	1.83807	-3.2241	0.00126371	0.00328628
ENSG00000184588	15.8881	-5.92265	1.54886	-3.82388	0.00013137	0.000387482
ENSG00000197816	5.70521	-5.92013	1.8447	-3.20927	0.00133072	0.00344845
ENSG00000267472	5.71997	-5.91606	1.8687	-3.16587	0.00154619	0.00397002
ENSG00000134533	793.274	-5.90656	0.22755	-25.9572	1.51e-148	1.22e-146
ENSG00000090539	31.0503	-5.90534	1.12749	-5.23759	1.63e-07	6.44e-07
ENSG00000111816	1268.51	-5.90182	0.180884	-32.6277	1.66e-233	2.61e-231
ENSG00000213144	61.6186	-5.89235	0.798746	-7.377	1.62e-13	9.84e-13
ENSG00000249679	5.61176	-5.89156	1.84504	-3.19319	0.0014071	0.00363327
ENSG00000124657	5.58471	-5.88546	1.84384	-3.19196	0.0014131	0.00364701
ENSG00000205456	5.58471	-5.88546	1.84384	-3.19196	0.0014131	0.00364701
ENSG00000078725	15.3102	-5.86609	1.55296	-3.77735	0.000158504	0.000462443
ENSG00000229375	5.44946	-5.85453	1.866	-3.13747	0.0017041	0.00434745
ENSG00000157613	45.1235	-5.85028	0.922331	-6.34294	2.25e-10	1.11e-09
ENSG00000164850	29.8797	-5.84868	1.13092	-5.17161	2.32e-07	9.07e-07
ENSG00000123453	15.0815	-5.84361	1.55545	-3.75686	0.000172062	0.000499561
ENSG00000069812	44.826	-5.84175	0.92338	-6.32649	2.51e-10	1.23e-09
ENSG00000215218	73.6719	-5.84061	0.719694	-8.11541	4.84e-16	3.37e-15
ENSG00000157064	29.262	-5.83858	1.1405	-5.11929	3.07e-07	1.18e-06
ENSG00000182578	14.934	-5.82758	1.56068	-3.73399	0.00018847	0.00054492
ENSG00000067066	761.654	-5.82733	0.227081	-25.6619	3.12e-145	2.42e-143
ENSG00000165899	29.383	-5.8225	1.13316	-5.13829	2.77e-07	1.07e-06
ENSG00000137843	44.2481	-5.82205	0.923485	-6.30444	2.89e-10	1.42e-09
ENSG00000165140	1865.59	-5.818	0.14865	-39.1389	0	0
ENSG00000068079	334.803	-5.8167	0.337339	-17.2429	1.27e-66	3.7e-65
ENSG00000169495	5.30191	-5.81188	1.86209	-3.12115	0.00180144	0.00457839
ENSG00000217275	5.30191	-5.81188	1.86209	-3.12115	0.00180144	0.00457839
ENSG00000142224	14.5031	-5.81091	1.56419	-3.71496	0.000203236	0.0005858
ENSG00000137571	5.24781	-5.79896	1.87165	-3.09832	0.0019462	0.00491438
ENSG00000165953	5.22076	-5.79241	1.87973	-3.08151	0.00205952	0.00518834
ENSG00000006071	28.7362	-5.79089	1.13448	-5.10445	3.32e-07	1.27e-06
ENSG00000236516	5.23552	-5.78803	1.90764	-3.03413	0.00241231	0.00601651
ENSG00000138829	214.136	-5.78583	0.416995	-13.8751	8.97e-44	1.66e-42
ENSG00000226372	5.16666	-5.77905	1.90398	-3.03525	0.00240336	0.00599488
ENSG00000144668	14.0728	-5.76626	1.57025	-3.6722	0.000240472	0.000687145
ENSG00000134258	97.7255	-5.7649	0.613242	-9.40068	5.42e-21	4.81e-20
ENSG00000159714	5.07321	-5.74782	1.87891	-3.05913	0.00221979	0.00556669
ENSG00000163827	5.07321	-5.74782	1.87891	-3.05913	0.00221979	0.00556669
ENSG00000258065	5.07321	-5.74782	1.87891	-3.05913	0.00221979	0.00556669
ENSG00000147573	5.04616	-5.74109	1.8819	-3.05069	0.00228317	0.0057143
ENSG00000248795	5.01911	-5.73432	1.8872	-3.03854	0.0023773	0.00593471
ENSG00000107485	10361.5	-5.73169	0.0717472	-79.8874	0	0
ENSG00000147255	27.4452	-5.72208	1.14053	-5.01703	5.25e-07	1.99e-06
ENSG00000169594	13.5342	-5.70998	1.57533	-3.62463	0.000289378	0.000819816
ENSG00000160321	4.92566	-5.70181	1.90529	-2.99263	0.00276585	0.00683803
ENSG00000205927	4.89861	-5.6948	1.90033	-2.99675	0.00272875	0.00675328
ENSG00000160339	4.87156	-5.6878	1.89785	-2.99696	0.00272684	0.00675088
ENSG00000154553	160.471	-5.68432	0.469012	-12.1198	8.3e-34	1.16e-32
ENSG00000105695	53.6908	-5.67862	0.807555	-7.03186	2.04e-12	1.16e-11
ENSG00000163017	4.81746	-5.67374	1.89981	-2.98647	0.00282216	0.00696683
ENSG00000183066	4.81746	-5.67374	1.89981	-2.98647	0.00282216	0.00696683
ENSG00000139352	12.9145	-5.64367	1.58607	-3.55827	0.000373307	0.00104534
ENSG00000177469	38.4096	-5.62781	0.941752	-5.97589	2.29e-09	1.05e-08
ENSG00000012223	4.66991	-5.62523	1.92404	-2.92365	0.00345949	0.00840989
ENSG00000106538	4.61581	-5.61047	1.91862	-2.92422	0.00345321	0.00839558
ENSG00000234685	4.58876	-5.60308	1.91981	-2.91856	0.00351656	0.00853511
ENSG00000167780	25.2246	-5.59802	1.14959	-4.86956	1.12e-06	4.11e-06
ENSG00000155980	62.892	-5.58964	0.727566	-7.68266	1.56e-14	1e-13
ENSG00000176753	4.53466	-5.58814	1.9301	-2.89526	0.00378839	0.00913717
ENSG00000133321	12.3637	-5.57719	1.59193	-3.50341	0.000459337	0.00127266
ENSG00000136689	24.3093	-5.57017	1.163	-4.78949	1.67e-06	6.06e-06
ENSG00000142552	36.2697	-5.56183	0.95211	-5.84158	5.17e-09	2.31e-08
ENSG00000164659	932.73	-5.55789	0.192301	-28.902	1.13e-183	1.18e-181
ENSG00000137841	23.9331	-5.54664	1.16522	-4.76017	1.93e-06	6.95e-06
ENSG00000180777	4.38711	-5.53657	1.94239	-2.85039	0.0043666	0.0104335
ENSG00000164120	361.186	-5.49008	0.299093	-18.3557	2.97e-75	1e-73
ENSG00000003989	7009.11	-5.47567	0.0790759	-69.2457	0	0
ENSG00000164626	761.947	-5.47189	0.207075	-26.4247	7.14e-154	6.09e-152
ENSG00000189127	23.1245	-5.47104	1.16073	-4.71345	2.44e-06	8.7e-06
ENSG00000102962	4.15841	-5.45869	1.96931	-2.77188	0.00557338	0.0131087
ENSG00000164867	4.15841	-5.45869	1.96931	-2.77188	0.00557338	0.0131087
ENSG00000152229	204.733	-5.45232	0.390257	-13.9711	2.34e-44	4.38e-43
ENSG00000148541	4.13136	-5.45044	1.96776	-2.76988	0.00560773	0.0131791
ENSG00000132139	4.10431	-5.44217	1.96926	-2.76356	0.00571747	0.0134154
ENSG00000143184	4.10431	-5.44217	1.96926	-2.76356	0.00571747	0.0134154
ENSG00000167916	4.10431	-5.44217	1.96926	-2.76356	0.00571747	0.0134154
ENSG00000188488	11.3805	-5.42614	1.60268	-3.38566	0.000710065	0.00191361
ENSG00000179284	4.05021	-5.42546	1.98228	-2.73697	0.00620071	0.0144562
ENSG00000165816	21.9411	-5.42071	1.17699	-4.60557	4.11e-06	1.44e-05
ENSG00000117122	11.0308	-5.41233	1.61361	-3.35418	0.000796018	0.00212766
ENSG00000139988	22.2515	-5.41111	1.17148	-4.61904	3.86e-06	1.35e-05
ENSG00000185640	3.99611	-5.40833	2.01075	-2.6897	0.00715162	0.0164997
ENSG00000214313	11.1518	-5.3956	1.60649	-3.35862	0.00078334	0.00209716
ENSG00000180264	10.9103	-5.39405	1.61579	-3.33833	0.000842821	0.00224594
ENSG00000272281	10.8833	-5.39086	1.61542	-3.33713	0.000846481	0.00225498
ENSG00000151640	21.4837	-5.38983	1.18015	-4.56707	4.95e-06	1.72e-05
ENSG00000162881	11.0977	-5.38922	1.60866	-3.35012	0.000807773	0.0021572
ENSG00000117318	632.128	-5.38436	0.221284	-24.3324	8.91e-131	6.06e-129
ENSG00000163431	3.90266	-5.36762	1.9967	-2.68824	0.00718293	0.0165649
ENSG00000164756	3.90266	-5.36762	1.9967	-2.68824	0.00718293	0.0165649
ENSG00000125823	3.87561	-5.35885	1.99671	-2.68384	0.00727825	0.016763
ENSG00000255398	3.87561	-5.35885	1.99671	-2.68384	0.00727825	0.016763
ENSG00000152034	3.82151	-5.34115	2.00774	-2.66029	0.00780743	0.0178767
ENSG00000155918	3.79446	-5.33216	2.01904	-2.64094	0.00826768	0.0188682
ENSG00000182111	20.7957	-5.31528	1.18189	-4.49729	6.88e-06	2.36e-05
ENSG00000108375	591.603	-5.29852	1.24339	-4.26135	2.03e-05	6.59e-05
ENSG00000143845	1722.65	-5.29476	0.135849	-38.9754	0	0
ENSG00000090554	3.70101	-5.2891	2.03611	-2.59764	0.00938662	0.0212259
ENSG00000256069	10.089	-5.28105	1.6313	-3.23734	0.00120652	0.00314707
ENSG00000118729	3.67396	-5.27976	2.03001	-2.60086	0.00929915	0.0210481
ENSG00000169174	3.67396	-5.27976	2.03001	-2.60086	0.00929915	0.0210481
ENSG00000100979	3.64691	-5.27042	2.0282	-2.59857	0.00936133	0.0211732
ENSG00000178206	3.64691	-5.27042	2.0282	-2.59857	0.00936133	0.0211732
ENSG00000134760	3.61986	-5.26105	2.03029	-2.59129	0.00956182	0.0215858
ENSG00000147378	3.61986	-5.26105	2.03029	-2.59129	0.00956182	0.0215858
ENSG00000198576	529.141	-5.25906	0.236217	-22.2637	8.31e-110	4.54e-108
ENSG00000242193	50.6582	-5.25635	0.74867	-7.02092	2.2e-12	1.25e-11
ENSG00000174827	386.408	-5.25403	0.272817	-19.2585	1.2e-82	4.5e-81
ENSG00000174992	3.59281	-5.25161	2.03661	-2.5786	0.00992006	0.0223407
ENSG00000171804	3.56576	-5.24206	2.0472	-2.5606	0.0104491	0.0234364
ENSG00000177294	3.56576	-5.24206	2.0472	-2.5606	0.0104491	0.0234364
ENSG00000243650	3.56576	-5.24206	2.0472	-2.5606	0.0104491	0.0234364
ENSGR0000178605	26.829	-5.23681	2.62618	-1.99408	0.0461436	0.0891703
ENSG00000104518	127.107	-5.22401	0.4663	-11.2031	3.94e-29	4.72e-28
ENSG00000145526	29.1362	-5.22301	0.970389	-5.38238	7.35e-08	2.99e-07
ENSG00000122859	3.51165	-5.22252	2.08543	-2.50429	0.0122699	0.0271049
ENSG00000230707	3.4846	-5.21241	2.11812	-2.46087	0.0138601	0.0302636
ENSG00000249948	3.4846	-5.21241	2.11812	-2.46087	0.0138601	0.0302636
ENSG00000255622	28.0611	-5.18827	0.984395	-5.27052	1.36e-07	5.42e-07
ENSG00000136960	9.69843	-5.18655	1.63545	-3.17133	0.00151745	0.0039004
ENSG00000189212	3.44526	-5.18622	2.06874	-2.50694	0.012178	0.0269103
ENSG00000186910	3.41821	-5.17623	2.06444	-2.50732	0.0121649	0.0268868
ENSG00000268529	3.41821	-5.17623	2.06444	-2.50732	0.0121649	0.0268868
ENSG00000196684	225.549	-5.16777	0.613513	-8.42324	3.66e-17	2.71e-16
ENSG00000119915	3.39116	-5.16621	2.06476	-2.50208	0.0123466	0.0272574
ENSG00000172867	3.39116	-5.16621	2.06476	-2.50208	0.0123466	0.0272574
ENSG00000246223	3.39116	-5.16621	2.06476	-2.50208	0.0123466	0.0272574
ENSG00000185499	1724.21	-5.16395	0.130886	-39.4537	0	0
ENSG00000103742	18.7251	-5.15639	1.19102	-4.32938	1.5e-05	4.92e-05
ENSG00000095370	3.36411	-5.15613	2.06961	-2.49135	0.0127259	0.0280144
ENSG00000099399	3.36411	-5.15613	2.06961	-2.49135	0.0127259	0.0280144
ENSG00000169302	3.36411	-5.15613	2.06961	-2.49135	0.0127259	0.0280144
ENSG00000256678	3.36411	-5.15613	2.06961	-2.49135	0.0127259	0.0280144
ENSG00000267142	3.33706	-5.14595	2.07923	-2.47494	0.013326	0.029216
ENSG00000180818	1144.96	-5.14413	0.157483	-32.6647	4.96e-234	7.85e-232
ENSG00000121898	50.9948	-5.1309	1.29774	-3.95372	7.69e-05	0.000232957
ENSG00000151892	9632.84	-5.1254	0.0669524	-76.5529	0	0
ENSG00000184330	3.28295	-5.12513	2.11651	-2.4215	0.0154566	0.0334541
ENSG00000178568	82.6191	-5.12417	0.564068	-9.08431	1.04e-19	8.73e-19
ENSG00000173193	2454.47	-5.10891	0.112598	-45.3729	0	0
ENSG00000169169	35.7676	-5.10571	0.851112	-5.99887	1.99e-09	9.2e-09
ENSG00000268869	8.91842	-5.09906	1.65855	-3.0744	0.00210925	0.00530494
ENSG00000125798	3.21656	-5.08623	2.11478	-2.40508	0.0161688	0.0348063
ENSG00000170054	3.18951	-5.07546	2.10675	-2.40915	0.0159899	0.0344662
ENSG00000196409	17.2048	-5.06542	1.21784	-4.15936	3.19e-05	0.000101028
ENSG00000165379	3.16246	-5.06469	2.10461	-2.40647	0.0161075	0.0346952
ENSG00000010319	17.1778	-5.06333	1.21729	-4.15949	3.19e-05	0.000100987
ENSG00000212719	3.13541	-5.05387	2.10767	-2.39784	0.0164919	0.0354204
ENSG00000169213	8.75658	-5.03228	1.65893	-3.03345	0.00241772	0.00602792
ENSG00000177551	3.0813	-5.03191	2.13023	-2.36214	0.0181695	0.0386532
ENSG00000183709	3.0813	-5.03191	2.13023	-2.36214	0.0181695	0.0386532
ENSG00000168350	669.891	-5.03178	0.201202	-25.0086	4.93e-138	3.59e-136
ENSG00000137225	3.05425	-5.02067	2.15186	-2.33318	0.0196387	0.0414913
ENSG00000165887	3.0272	-5.00916	2.18456	-2.29299	0.0218489	0.0456853
ENSG00000156564	8.36757	-5.00189	1.69226	-2.95575	0.00311913	0.00764468
ENSG00000162882	33.966	-4.98906	0.870131	-5.73368	9.83e-09	4.31e-08
ENSG00000185924	456.849	-4.96003	0.234423	-21.1585	2.31e-99	1.12e-97
ENSG00000238118	8.11182	-4.95622	1.69814	-2.91861	0.0035159	0.00853448
ENSG00000134627	2.93376	-4.9555	2.1514	-2.30338	0.0212572	0.0445825
ENSG00000136514	2.93376	-4.9555	2.1514	-2.30338	0.0212572	0.0445825
ENSG00000188596	2.93376	-4.9555	2.1514	-2.30338	0.0212572	0.0445825
ENSG00000128284	32.2682	-4.9545	0.864284	-5.7325	9.9e-09	4.33e-08
ENSG00000184845	8.27213	-4.94637	1.67288	-2.95679	0.00310857	0.00762401
ENSG00000100285	2.90671	-4.94381	2.15204	-2.29727	0.0216033	0.0452289
ENSG00000116014	2.90671	-4.94381	2.15204	-2.29727	0.0216033	0.0452289
ENSG00000154438	2.90671	-4.94381	2.15204	-2.29727	0.0216033	0.0452289
ENSG00000184357	2.90671	-4.94381	2.15204	-2.29727	0.0216033	0.0452289
ENSG00000100342	7.97657	-4.934	1.68665	-2.92532	0.00344104	0.00836975
ENSG00000115155	2.87966	-4.93204	2.15873	-2.2847	0.0223304	0.04657
ENSG00000139567	2.87966	-4.93204	2.15873	-2.2847	0.0223304	0.04657
ENSG00000187721	2.87966	-4.93204	2.15873	-2.2847	0.0223304	0.04657
ENSG00000197016	2.87966	-4.93204	2.15873	-2.2847	0.0223304	0.04657
ENSG00000203797	2.87966	-4.93204	2.15873	-2.2847	0.0223304	0.04657
ENSG00000172794	71.9361	-4.9249	0.577631	-8.52602	1.51e-17	1.14e-16
ENSG00000168491	72.51	-4.92132	0.579374	-8.49419	1.99e-17	1.5e-16
ENSG00000234511	2.8526	-4.92014	2.17184	-2.26542	0.0234868	0.048769
ENSG00000172828	23.2288	-4.91452	1.01474	-4.84313	1.28e-06	4.67e-06
ENSG00000254506	2.82555	-4.90803	2.19304	-2.238	0.0252211	0.0519887
ENSG00000047597	69.7539	-4.89809	0.583904	-8.38853	4.92e-17	3.61e-16
ENSG00000140022	77.4756	-4.88249	0.548915	-8.8948	5.85e-19	4.75e-18
ENSG00000159217	22.4763	-4.8642	1.01809	-4.77778	1.77e-06	6.4e-06
ENSG00000183346	2.73211	-4.8501	2.21823	-2.18647	0.0287813	0.0585421
ENSG00000196748	37.8501	-4.8475	0.778339	-6.22801	4.72e-10	2.28e-09
ENSG00000185668	7.73358	-4.84581	1.69154	-2.86473	0.00417365	0.0100002
ENSG00000111674	430.042	-4.84108	0.23694	-20.4317	8.74e-93	3.78e-91
ENSG00000102174	74.716	-4.83719	0.554334	-8.72613	2.64e-18	2.06e-17
ENSG00000221963	133.279	-4.83064	0.418472	-11.5435	7.96e-31	1.01e-29
ENSG00000069482	187.404	-4.83025	0.350163	-13.7943	2.76e-43	5.02e-42
ENSG00000100365	2.67801	-4.82467	2.20442	-2.18863	0.0286239	0.0582765
ENSG00000128594	2.67801	-4.82467	2.20442	-2.18863	0.0286239	0.0582765
ENSG00000149972	2.67801	-4.82467	2.20442	-2.18863	0.0286239	0.0582765
ENSG00000173917	2.67801	-4.82467	2.20442	-2.18863	0.0286239	0.0582765
ENSG00000182393	2.67801	-4.82467	2.20442	-2.18863	0.0286239	0.0582765
ENSG00000189023	2.67801	-4.82467	2.20442	-2.18863	0.0286239	0.0582765
ENSG00000107099	245.684	-4.82376	0.306271	-15.75	6.87e-56	1.67e-54
ENSG00000237289	200.057	-4.81859	0.376292	-12.8055	1.53e-37	2.39e-36
ENSG00000196132	29.8194	-4.81714	0.86979	-5.53828	3.05e-08	1.28e-07
ENSG00000101670	2.65096	-4.81187	2.20884	-2.17847	0.0293713	0.0596351
ENSG00000125531	2.65096	-4.81187	2.20884	-2.17847	0.0293713	0.0596351
ENSG00000160801	2.65096	-4.81187	2.20884	-2.17847	0.0293713	0.0596351
ENSG00000167165	2.65096	-4.81187	2.20884	-2.17847	0.0293713	0.0596351
ENSG00000168658	2.65096	-4.81187	2.20884	-2.17847	0.0293713	0.0596351
ENSG00000173876	2.65096	-4.81187	2.20884	-2.17847	0.0293713	0.0596351
ENSG00000059378	824.827	-4.80976	0.171291	-28.0794	1.75e-173	1.72e-171
ENSG00000049130	1936.85	-4.80926	0.119247	-40.3303	0	0
ENSG00000128656	419.557	-4.80559	0.239404	-20.0731	1.27e-89	5.24e-88
ENSG00000177096	65.8935	-4.80333	0.585007	-8.21072	2.2e-16	1.56e-15
ENSG00000250120	80.5536	-4.80153	0.528462	-9.08586	1.03e-19	8.61e-19
ENSG00000102043	2.6239	-4.79895	2.22054	-2.16116	0.0306828	0.0620228
ENSG00000151005	2.6239	-4.79895	2.22054	-2.16116	0.0306828	0.0620228
ENSG00000162654	2.6239	-4.79895	2.22054	-2.16116	0.0306828	0.0620228
ENSG00000249721	2.6239	-4.79895	2.22054	-2.16116	0.0306828	0.0620228
ENSG00000082175	9277.94	-4.79495	0.0692064	-69.2847	0	0
ENSG00000156127	299.254	-4.79465	0.276159	-17.3619	1.6e-67	4.79e-66
ENSG00000198691	7.45078	-4.79013	1.70563	-2.80842	0.00497852	0.0117843
ENSG00000166888	1020.17	-4.78607	0.15492	-30.8939	1.44e-209	1.82e-207
ENSG00000090530	2.59685	-4.78583	2.24074	-2.13583	0.0326933	0.0656368
ENSG00000170214	2.59685	-4.78583	2.24074	-2.13583	0.0326933	0.0656368
ENSG00000077935	79.2203	-4.7851	0.533259	-8.97331	2.88e-19	2.37e-18
ENSG00000158560	44.5739	-4.78331	0.716221	-6.67854	2.41e-11	1.28e-10
ENSG00000159409	72.3606	-4.78144	0.555277	-8.6109	7.25e-18	5.58e-17
ENSG00000060982	7.41143	-4.77627	1.71194	-2.78998	0.00527115	0.0124332
ENSG00000019505	2.5698	-4.77242	2.27336	-2.09928	0.0357921	0.0711476
ENSG00000163273	2.5698	-4.77242	2.27336	-2.09928	0.0357921	0.0711476
ENSG00000198054	29.3207	-4.77196	0.872464	-5.46952	4.51e-08	1.87e-07
ENSG00000005961	115.201	-4.75913	0.4414	-10.7819	4.19e-27	4.67e-26
ENSG00000144868	2.54275	-4.75854	2.32966	-2.04259	0.0410929	0.0804068
ENSG00000258780	7.07653	-4.75497	1.8438	-2.57889	0.00991173	0.0223266
ENSG00000115935	62.1128	-4.73549	0.599477	-7.89938	2.8e-15	1.88e-14
ENSG00000106624	56.1935	-4.72809	0.621659	-7.6056	2.84e-14	1.79e-13
ENSG00000232745	14.0281	-4.72629	1.23968	-3.8125	0.000137566	0.000404537
ENSG00000133328	7.15568	-4.72325	1.71992	-2.74621	0.00602889	0.0140969
ENSG00000144476	744.461	-4.7097	0.175156	-26.8887	2.98e-159	2.63e-157
ENSG00000162747	2.47636	-4.70877	2.27543	-2.06939	0.0385091	0.0758617
ENSG00000183668	2.47636	-4.70877	2.27543	-2.06939	0.0385091	0.0758617
ENSG00000176746	2.44931	-4.6948	2.26727	-2.07068	0.0383886	0.0756659
ENSG00000236956	2.44931	-4.6948	2.26727	-2.07068	0.0383886	0.0756659
ENSG00000143546	6.72486	-4.68275	1.73426	-2.70014	0.00693105	0.0160304
ENSG00000102195	2.42226	-4.68078	2.26847	-2.06341	0.0390735	0.076889
ENSG00000121361	2.42226	-4.68078	2.26847	-2.06341	0.0390735	0.076889
ENSG00000129757	2.42226	-4.68078	2.26847	-2.06341	0.0390735	0.076889
ENSG00000100078	6.92698	-4.6731	1.73225	-2.69771	0.00698191	0.0161379
ENSG00000125384	6.64371	-4.6675	1.74708	-2.6716	0.00754904	0.0173305
ENSG00000105641	2.3952	-4.66664	2.27812	-2.04846	0.0405153	0.0793705
ENSG00000135218	2.3952	-4.66664	2.27812	-2.04846	0.0405153	0.0793705
ENSG00000172350	2.3952	-4.66664	2.27812	-2.04846	0.0405153	0.0793705
ENSG00000183798	2.3952	-4.66664	2.27812	-2.04846	0.0405153	0.0793705
ENSG00000211892	2.3952	-4.66664	2.27812	-2.04846	0.0405153	0.0793705
ENSG00000169085	60.5212	-4.6586	0.592915	-7.8571	3.93e-15	2.61e-14
ENSG00000165084	2.36815	-4.65229	2.29715	-2.02525	0.042842	0.0833591
ENSG00000166206	2.36815	-4.65229	2.29715	-2.02525	0.042842	0.0833591
ENSG00000252645	2.36815	-4.65229	2.29715	-2.02525	0.042842	0.0833591
ENSG00000164743	27.0853	-4.65208	0.895187	-5.19677	2.03e-07	7.96e-07
ENSG00000206075	6.79173	-4.64775	1.72698	-2.69126	0.00711831	0.0164317
ENSG00000157873	6.76468	-4.64237	1.72977	-2.6838	0.00727898	0.016763
ENSG00000216490	6.55027	-4.6417	1.7439	-2.66167	0.00777535	0.0178184
ENSG00000239899	6.73763	-4.63686	1.73392	-2.67421	0.00749062	0.017208
ENSG00000184227	19.9321	-4.62957	1.02151	-4.53207	5.84e-06	2.02e-05
ENSG00000187848	35.9768	-4.61295	1.32298	-3.4868	0.000488843	0.00135015
ENSG00000144290	18.7089	-4.5947	1.056	-4.35103	1.36e-05	4.48e-05
ENSG00000149403	19.1127	-4.59398	1.04406	-4.4001	1.08e-05	3.62e-05
ENSG00000214617	18.6401	-4.59238	1.05569	-4.35011	1.36e-05	4.49e-05
ENSG00000150722	12.198	-4.56402	1.28983	-3.53847	0.000402449	0.00112212
ENSG00000116106	88.0625	-4.56271	0.481304	-9.47989	2.55e-21	2.29e-20
ENSG00000174498	19.0173	-4.55752	1.03093	-4.42078	9.83e-06	3.31e-05
ENSG00000112183	596.655	-4.55496	0.193537	-23.5353	1.78e-122	1.09e-120
ENSG00000127084	563.407	-4.55278	0.194685	-23.3854	6.02e-121	3.63e-119
ENSG00000166402	42.8625	-4.54102	0.683845	-6.64043	3.13e-11	1.64e-10
ENSG00000197846	18.5869	-4.5219	1.03745	-4.35866	1.31e-05	4.33e-05
ENSG00000168447	42.2034	-4.51763	0.686707	-6.57868	4.75e-11	2.46e-10
ENSG00000043039	144.75	-4.51035	0.370997	-12.1574	5.24e-34	7.35e-33
ENSG00000175591	427.853	-4.50721	0.221565	-20.3426	5.4e-92	2.3e-90
ENSG00000165168	5.95761	-4.50444	1.7764	-2.53572	0.0112216	0.0249816
ENSG00000198133	620.271	-4.50009	0.182612	-24.6429	4.38e-134	3.09e-132
ENSG00000188176	52.6658	-4.46835	0.608633	-7.34162	2.11e-13	1.27e-12
ENSG00000166220	23.5756	-4.4631	0.90472	-4.93313	8.09e-07	3.01e-06
ENSG00000151062	17.4971	-4.4629	1.04989	-4.25084	2.13e-05	6.88e-05
ENSG00000135144	5.75596	-4.45167	1.78402	-2.4953	0.0125849	0.0277466
ENSG00000141934	1013.45	-4.43836	0.145183	-30.5708	2.99e-205	3.64e-203
ENSG00000107201	2143.22	-4.42949	0.103408	-42.8351	0	0
ENSG00000145703	11.5124	-4.42567	1.28778	-3.43666	0.000588934	0.00160445
ENSG00000205436	11.4583	-4.41957	1.28451	-3.44066	0.000580291	0.00158311
ENSG00000173114	5.84988	-4.41817	1.77348	-2.49124	0.0127298	0.0280201
ENSG00000117115	681.737	-4.41452	0.171897	-25.6811	1.9e-145	1.48e-143
ENSG00000255690	5.58136	-4.4033	1.79627	-2.45136	0.0142318	0.0309996
ENSG00000183734	365.806	-4.40217	0.230491	-19.0991	2.57e-81	9.51e-80
ENSG00000084636	117.968	-4.39803	0.400472	-10.9821	4.66e-28	5.36e-27
ENSG00000120217	5.52726	-4.39071	1.7974	-2.44281	0.0145733	0.0316954
ENSG00000175356	44.8077	-4.38762	0.649199	-6.75852	1.39e-11	7.52e-11
ENSG00000131016	11.1755	-4.38246	1.28852	-3.40116	0.000670997	0.00181583
ENSG00000143473	33.795	-4.37776	0.746382	-5.8653	4.48e-09	2.02e-08
ENSG00000196427	27.2728	-4.37719	0.828215	-5.28509	1.26e-07	5.02e-07
ENSG00000152778	1262.3	-4.36908	0.129921	-33.6286	6.4e-248	1.15e-245
ENSG00000163840	2377.4	-4.35456	0.100505	-43.3267	0	0
ENSG00000205002	86.268	-4.33503	0.461622	-9.39087	5.95e-21	5.27e-20
ENSG00000117322	5.29856	-4.32706	1.8122	-2.38773	0.0169526	0.0363085
ENSG00000237732	53.3318	-4.32418	0.590187	-7.3268	2.36e-13	1.42e-12
ENSG00000124587	174.467	-4.30083	0.325185	-13.2258	6.23e-40	1.04e-38
ENSG00000101194	15.6404	-4.29323	1.07735	-3.985	6.75e-05	0.000205662
ENSG00000221743	26.1421	-4.29249	0.82809	-5.18361	2.18e-07	8.53e-07
ENSG00000168143	533.218	-4.29158	0.188396	-22.7795	7.32e-115	4.16e-113
ENSG00000049089	71.7172	-4.28217	0.508181	-8.42646	3.56e-17	2.64e-16
ENSG00000138496	1535.74	-4.27448	0.115297	-37.0737	7.45e-301	1.91e-298
ENSG00000110436	260.888	-4.27166	0.27003	-15.8192	2.29e-56	5.6e-55
ENSG00000183784	30.7152	-4.26636	0.766974	-5.56259	2.66e-08	1.12e-07
ENSG00000117228	10.3271	-4.26492	1.31099	-3.25321	0.00114109	0.00298581
ENSG00000144331	30.6463	-4.26479	0.76164	-5.59948	2.15e-08	9.16e-08
ENSG00000127954	5.06986	-4.26046	1.82866	-2.32983	0.019815	0.0418081
ENSG00000167207	51.1111	-4.26008	0.597062	-7.13508	9.67e-13	5.63e-12
ENSG00000188883	56.2233	-4.25223	0.561396	-7.57439	3.61e-14	2.27e-13
ENSG00000159921	35.7167	-4.25178	0.704588	-6.03443	1.6e-09	7.43e-09
ENSG00000179542	20.4525	-4.24951	0.931264	-4.56316	5.04e-06	1.75e-05
ENSG00000122786	20.4402	-4.24626	0.929224	-4.56969	4.88e-06	1.7e-05
ENSG00000127399	612.081	-4.2408	0.178383	-23.7736	6.27e-125	4e-123
ENSG00000143891	25.604	-4.23834	0.832373	-5.09188	3.55e-07	1.36e-06
ENSG00000225362	58.7396	-4.20939	0.558822	-7.53261	4.97e-14	3.11e-13
ENSG00000157404	5.05557	-4.19483	1.83191	-2.28987	0.0220291	0.0460085
ENSG00000218902	4.84116	-4.19064	1.84705	-2.26883	0.0232784	0.0483783
ENSG00000157601	112.633	-4.18362	0.395671	-10.5735	3.96e-26	4.26e-25
ENSG00000256463	4.81411	-4.18337	1.84794	-2.26381	0.023586	0.0489466
ENSG00000162989	9.77624	-4.17762	1.32447	-3.15418	0.00160951	0.00412226
ENSG00000204965	47.5629	-4.17644	1.1749	-3.55471	0.00037839	0.00105902
ENSG00000175697	24.2047	-4.15143	0.843957	-4.91901	8.7e-07	3.23e-06
ENSG00000242715	4.72066	-4.14913	1.8994	-2.18445	0.0289293	0.0588209
ENSG00000142973	65.8339	-4.12847	0.50648	-8.15131	3.6e-16	2.52e-15
ENSG00000181585	4.63951	-4.12505	1.87082	-2.20494	0.0274581	0.0561694
ENSG00000229474	18.7975	-4.12041	0.945647	-4.35724	1.32e-05	4.36e-05
ENSG00000188677	164.508	-4.11951	0.328859	-12.5267	5.34e-36	8.01e-35
ENSG00000100626	328.878	-4.11485	0.234972	-17.5121	1.16e-68	3.51e-67
ENSG00000135439	97.8746	-4.10975	0.415967	-9.87998	5.08e-23	4.92e-22
ENSG00000189058	4.58541	-4.10958	1.86742	-2.20067	0.0277591	0.056715
ENSG00000206172	4.55836	-4.10194	1.86982	-2.19376	0.0282523	0.0576352
ENSG00000113396	69.2447	-4.08881	0.501446	-8.15404	3.52e-16	2.47e-15
ENSG00000187017	705.079	-4.0881	0.16221	-25.2025	3.77e-140	2.79e-138
ENSG00000241361	86.7527	-4.08536	0.441338	-9.25676	2.11e-20	1.82e-19
ENSG00000130558	1049.76	-4.06989	0.133036	-30.5923	1.55e-205	1.89e-203
ENSG00000197457	599.009	-4.06067	0.173404	-23.4175	2.84e-121	1.72e-119
ENSG00000148400	1472.27	-4.0594	0.115402	-35.1761	4.65e-271	9.61e-269
ENSG00000107518	58.2606	-4.05147	0.531012	-7.62972	2.35e-14	1.5e-13
ENSG00000254503	4.41081	-4.04825	1.8962	-2.13493	0.0327666	0.0657655
ENSG00000204140	4.59817	-4.04629	1.86479	-2.16984	0.0300193	0.0608074
ENSG00000214425	26.5027	-4.04321	0.786756	-5.13909	2.76e-07	1.07e-06
ENSG00000196154	49.3873	-4.043	0.577608	-6.99955	2.57e-12	1.45e-11
ENSG00000253767	53.8921	-4.03817	0.555874	-7.26453	3.74e-13	2.23e-12
ENSG00000189045	13.526	-4.03693	1.09988	-3.67033	0.000242235	0.000691998
ENSG00000172476	4.35671	-4.0318	1.88937	-2.13393	0.0328485	0.0659175
ENSG00000119630	4.32966	-4.02369	1.89058	-2.12828	0.0333139	0.0667893
ENSG00000057593	92.1443	-4.02234	0.420503	-9.56554	1.12e-21	1.02e-20
ENSG00000178718	968.659	-4.01629	0.13608	-29.5141	1.9e-191	2.12e-189
ENSG00000113389	448.476	-4.01138	0.194463	-20.628	1.54e-94	6.85e-93
ENSG00000143341	22.0505	-4.00997	0.856166	-4.68363	2.82e-06	1e-05
ENSG00000064692	38.779	-4.0052	0.652372	-6.13944	8.28e-10	3.93e-09
ENSG00000138642	729.458	-4.002	0.155032	-25.8139	6.19e-147	4.93e-145
ENSG00000100385	4.45063	-3.99047	1.88064	-2.12187	0.0338487	0.0677541
ENSG00000130813	129.494	-3.97896	0.35813	-11.1104	1.12e-28	1.32e-27
ENSG00000257335	25.4133	-3.9786	0.800482	-4.97025	6.69e-07	2.51e-06
ENSG00000175877	4.39652	-3.97429	1.87995	-2.11404	0.034512	0.0688959
ENSG00000168062	12.9752	-3.96946	1.11033	-3.57502	0.0003502	0.000983707
ENSG00000164949	12.9481	-3.96678	1.10927	-3.57602	0.000348866	0.00098047
ENSG00000206262	4.36947	-3.96584	1.88414	-2.10486	0.0353039	0.0702876
ENSG00000237452	4.36947	-3.96584	1.88414	-2.10486	0.0353039	0.0702876
ENSG00000177519	12.0742	-3.94638	1.15399	-3.41976	0.000626757	0.00170294
ENSG00000185697	896.337	-3.94299	0.142518	-27.6666	1.76e-168	1.67e-166
ENSG00000173088	8.36223	-3.94274	1.37452	-2.86846	0.00412481	0.00989201
ENSG00000121316	45.378	-3.93568	0.589295	-6.67862	2.41e-11	1.28e-10
ENSG00000121075	37.3384	-3.9331	0.652886	-6.02418	1.7e-09	7.9e-09
ENSG00000170965	16.2813	-3.93249	0.985132	-3.99184	6.56e-05	0.000199984
ENSG00000159307	4.07391	-3.93235	1.91714	-2.05115	0.0402522	0.0789629
ENSG00000217791	4.07391	-3.93235	1.91714	-2.05115	0.0402522	0.0789629
ENSG00000131080	107.735	-3.93079	0.382805	-10.2684	9.78e-25	1e-23
ENSG00000137745	32.9113	-3.88119	0.700059	-5.54408	2.95e-08	1.24e-07
ENSG00000029534	11.8853	-3.87747	1.13286	-3.42274	0.000619939	0.00168593
ENSG00000189275	4.11372	-3.87147	1.91241	-2.02439	0.0429297	0.0835148
ENSG00000169071	24.3076	-3.86893	0.798497	-4.84526	1.26e-06	4.63e-06
ENSG00000185338	36.0306	-3.8659	0.65448	-5.90683	3.49e-09	1.58e-08
ENSG00000213100	3.89931	-3.86238	1.94295	-1.9879	0.0468231	0.0903435
ENSG00000166250	11.2799	-3.84561	1.17239	-3.28014	0.00103757	0.00273023
ENSG00000182168	85.8849	-3.84475	0.424976	-9.04698	1.47e-19	1.22e-18
ENSG00000121101	196.196	-3.8433	0.282896	-13.5856	4.88e-42	8.54e-41
ENSG00000107954	163.565	-3.84241	0.306867	-12.5214	5.7e-36	8.55e-35
ENSG00000188385	43.5719	-3.83801	0.597795	-6.42027	1.36e-10	6.83e-10
ENSG00000183067	20.005	-3.83023	0.882188	-4.34175	1.41e-05	4.66e-05
ENSG00000100767	87.9787	-3.82291	0.416426	-9.18027	4.3e-20	3.66e-19
ENSG00000166025	1085.35	-3.81282	0.124734	-30.5676	3.3e-205	3.99e-203
ENSG00000175886	71.3337	-3.80277	1.43473	-2.65051	0.00803696	0.018367
ENSG00000157514	958.064	-3.80128	0.132423	-28.7056	3.25e-181	3.36e-179
ENSG00000152270	251.081	-3.77101	0.258445	-14.5911	3.2e-48	6.55e-47
ENSG00000108387	7.16662	-3.77087	1.48502	-2.53928	0.0111082	0.0247676
ENSG00000213928	265.551	-3.75107	0.238472	-15.7297	9.47e-56	2.29e-54
ENSG00000151474	373.287	-3.74207	0.207238	-18.0568	6.97e-73	2.28e-71
ENSG00000101331	36.1099	-3.7402	0.639349	-5.85001	4.92e-09	2.2e-08
ENSG00000137801	8931.27	-3.72922	0.0600114	-62.142	0	0
ENSG00000160862	7.64955	-3.72873	1.40628	-2.65148	0.0080139	0.0183202
ENSG00000115919	504.886	-3.72719	0.178505	-20.8801	8.12e-97	3.73e-95
ENSG00000147642	265.335	-3.72472	0.239066	-15.5803	9.91e-55	2.33e-53
ENSG00000250722	10.727	-3.72412	1.17226	-3.17688	0.00148869	0.00383243
ENSG00000064205	200.438	-3.70984	0.282561	-13.1293	2.24e-39	3.65e-38
ENSG00000169955	113.929	-3.70451	0.360217	-10.2841	8.31e-25	8.53e-24
ENSG00000164308	28.3777	-3.70396	0.716939	-5.16634	2.39e-07	9.31e-07
ENSG00000196604	10.4319	-3.67682	1.16711	-3.15035	0.00163075	0.00417168
ENSG00000226942	24.4661	-3.67185	0.762915	-4.81292	1.49e-06	5.41e-06
ENSG00000075290	31.0799	-3.65035	0.675303	-5.4055	6.46e-08	2.65e-07
ENSG00000101311	140.408	-3.64725	0.333153	-10.9477	6.82e-28	7.79e-27
ENSG00000169255	772.724	-3.62846	0.147048	-24.6754	1.97e-134	1.4e-132
ENSG00000177191	9.97454	-3.60683	1.18102	-3.05399	0.00225816	0.00565434
ENSG00000171992	686.737	-3.59959	0.152731	-23.5682	8.17e-123	5.05e-121
ENSG00000137819	69.4307	-3.59916	0.45347	-7.93693	2.07e-15	1.4e-14
ENSG00000165061	72.2111	-3.59127	0.443564	-8.09641	5.66e-16	3.92e-15
ENSG00000175785	79.8592	-3.59113	0.419462	-8.56127	1.12e-17	8.5e-17
ENSG00000081479	6.69493	-3.58897	1.45559	-2.46564	0.0136769	0.029915
ENSG00000205018	49.6006	-3.58018	0.530107	-6.75369	1.44e-11	7.77e-11
ENSG00000254701	12.9074	-3.57877	1.22511	-2.92118	0.00348705	0.00846923
ENSG00000166780	259.298	-3.57745	0.234678	-15.2441	1.8e-52	4.04e-51
ENSG00000102683	20.191	-3.57337	0.844377	-4.23196	2.32e-05	7.46e-05
ENSG00000105996	12.9049	-3.57268	1.0395	-3.43694	0.000588328	0.0016032
ENSG00000163071	144.391	-3.54232	0.323087	-10.964	5.69e-28	6.52e-27
ENSG00000128253	18.778	-3.54154	0.862193	-4.10759	4e-05	0.000125256
ENSG00000179292	6.12886	-3.54116	1.52083	-2.32844	0.019889	0.0419502
ENSG00000162039	38.3223	-3.53255	0.596859	-5.91858	3.25e-09	1.48e-08
ENSG00000064309	851.916	-3.52525	0.133062	-26.4933	1.16e-154	9.98e-153
ENSG00000156049	16.1707	-3.52247	0.922766	-3.81729	0.000134923	0.000397254
ENSG00000125730	9.73155	-3.51915	1.18279	-2.97528	0.00292717	0.0072087
ENSG00000148680	9.67745	-3.51135	1.18719	-2.95769	0.00309953	0.00760358
ENSG00000122592	12.662	-3.50533	1.03127	-3.39904	0.000676236	0.0018289
ENSG00000162894	223.099	-3.50445	0.249429	-14.0499	7.71e-45	1.47e-43
ENSG00000113721	6.65359	-3.5041	1.45368	-2.4105	0.0159309	0.0343614
ENSG00000231579	6.27688	-3.49388	1.45676	-2.39839	0.0164674	0.0353855
ENSG00000135406	95.5297	-3.48969	0.397029	-8.78952	1.5e-18	1.19e-17
ENSG00000177103	18.4957	-3.4893	0.855259	-4.07982	4.51e-05	0.000140387
ENSG00000146054	92.7722	-3.48451	0.383466	-9.08687	1.02e-19	8.53e-19
ENSG00000103534	95.3223	-3.46837	0.377511	-9.18747	4.02e-20	3.42e-19
ENSG00000102755	21.8156	-3.46789	0.790507	-4.38691	1.15e-05	3.83e-05
ENSG00000138119	4606.9	-3.46667	0.0697535	-49.6988	0	0
ENSG00000211445	89.0332	-3.46584	0.388946	-8.91086	5.06e-19	4.13e-18
ENSG00000150995	226.385	-3.4618	0.253608	-13.6502	2.01e-42	3.57e-41
ENSG00000171557	9.04498	-3.45987	1.22427	-2.82607	0.00471235	0.0111962
ENSG00000126233	8.71007	-3.45302	1.25797	-2.74491	0.00605273	0.0141496
ENSG00000089041	6.12933	-3.4527	1.46799	-2.35199	0.018673	0.0395951
ENSG00000137198	65.0145	-3.44941	0.465254	-7.41403	1.23e-13	7.53e-13
ENSG00000215548	45.0134	-3.44869	0.545974	-6.31659	2.67e-10	1.31e-09
ENSG00000265386	11.8819	-3.44533	1.05794	-3.25663	0.00112742	0.00295364
ENSG00000187994	146.397	-3.43959	0.30803	-11.1664	5.95e-29	7.08e-28
ENSG00000182782	8.91219	-3.42861	1.24375	-2.75667	0.0058394	0.0136865
ENSG00000164292	4668.51	-3.4237	0.0729947	-46.9034	0	0
ENSG00000198626	12.03	-3.42248	1.0518	-3.25394	0.00113817	0.00298
ENSG00000223658	26.7321	-3.41598	0.705963	-4.83875	1.31e-06	4.77e-06
ENSG00000155380	1073.06	-3.41481	0.119797	-28.5051	1.01e-178	1.03e-176
ENSG00000123094	476.83	-3.41221	0.179039	-19.0585	5.58e-81	2.06e-79
ENSG00000139211	330.379	-3.40754	0.203306	-16.7606	4.74e-63	1.31e-61
ENSG00000185567	209.443	-3.40695	0.253499	-13.4397	3.54e-41	6.08e-40
ENSG00000106006	14.0594	-3.40679	1.00361	-3.39453	0.00068747	0.0018576
ENSG00000003096	11.8677	-3.40424	1.04813	-3.24793	0.00116248	0.00303575
ENSG00000169247	44.3258	-3.40307	0.544922	-6.24506	4.24e-10	2.05e-09
ENSG00000103723	67.9824	-3.40015	0.442742	-7.67975	1.59e-14	1.03e-13
ENSG00000124575	14.6235	-3.39596	0.945307	-3.59244	0.000327594	0.000923097
ENSG00000128045	8.99135	-3.39314	1.20693	-2.81137	0.00493311	0.0116866
ENSG00000047662	31.4908	-3.38481	0.648977	-5.21561	1.83e-07	7.22e-07
ENSG00000130005	506.673	-3.38269	0.16818	-20.1136	5.61e-90	2.34e-88
ENSG00000017621	49.0972	-3.37488	0.51608	-6.53945	6.17e-11	3.18e-10
ENSG00000188916	10.8191	-3.34671	1.11784	-2.99391	0.0027543	0.00681182
ENSG00000185269	11.0335	-3.33236	1.08089	-3.08299	0.00204932	0.00516448
ENSG00000163909	39.6076	-3.32626	0.574933	-5.78547	7.23e-09	3.2e-08
ENSG00000049768	64.4014	-3.32304	0.447386	-7.4277	1.11e-13	6.81e-13
ENSG00000147041	1057.64	-3.3183	0.117372	-28.2716	7.72e-176	7.77e-174
ENSG00000183091	206.187	-3.31776	0.252184	-13.1561	1.57e-39	2.58e-38
ENSG00000130528	5.29521	-3.31096	1.56258	-2.11891	0.0340982	0.0682028
ENSG00000259405	5.59078	-3.30886	1.49771	-2.20929	0.0271545	0.0556118
ENSG00000213694	833.712	-3.30721	0.13199	-25.0565	1.48e-138	1.08e-136
ENSG00000137672	13.8021	-3.30615	0.957309	-3.45358	0.000553192	0.00151475
ENSG00000186470	50.5589	-3.29573	0.511565	-6.44245	1.18e-10	5.93e-10
ENSG00000248409	5.53667	-3.29563	1.50573	-2.18873	0.0286164	0.0582765
ENSG00000119938	5.50962	-3.28887	1.51347	-2.17306	0.0297759	0.0603825
ENSG00000182584	69.5222	-3.27939	0.443101	-7.401	1.35e-13	8.27e-13
ENSG00000186354	16.6105	-3.26367	0.877707	-3.71841	0.000200482	0.000578251
ENSG00000142606	13.7485	-3.26302	0.962613	-3.38976	0.000699548	0.00188882
ENSG00000078081	7.68706	-3.26232	1.30005	-2.50938	0.0120945	0.0267503
ENSG00000183914	16.5023	-3.2544	0.881543	-3.69171	0.000222754	0.000638977
ENSG00000099769	10.5097	-3.25205	1.10131	-2.9529	0.00314805	0.00771028
ENSG00000177721	210.731	-3.24386	0.246661	-13.1511	1.68e-39	2.76e-38
ENSG00000136099	5.36208	-3.2415	1.51427	-2.14064	0.0323031	0.0649322
ENSG00000181085	472.096	-3.23775	0.167351	-19.347	2.16e-83	8.16e-82
ENSG00000026950	40.2072	-3.23648	0.562268	-5.75612	8.61e-09	3.79e-08
ENSG00000167011	5.03946	-3.23517	1.58423	-2.04211	0.0411404	0.0804778
ENSG00000115380	305.199	-3.22945	0.207691	-15.5493	1.61e-54	3.78e-53
ENSG00000230650	12.7934	-3.22182	0.990729	-3.25197	0.00114608	0.00299779
ENSG00000204267	15.8846	-3.2205	0.885232	-3.63802	0.000274737	0.00077998
ENSG00000249026	7.45836	-3.21532	1.31206	-2.45059	0.0142623	0.0310598
ENSG00000167103	81.2299	-3.203	0.407867	-7.85307	4.06e-15	2.69e-14
ENSG00000271361	35.9868	-3.20109	0.588307	-5.44119	5.29e-08	2.18e-07
ENSG00000127129	92.1594	-3.19833	0.372674	-8.5821	9.32e-18	7.12e-17
ENSG00000204967	10.3872	-3.19233	1.0874	-2.93574	0.00332749	0.00811376
ENSG00000189014	10.0646	-3.18807	1.10907	-2.87455	0.00404604	0.00971717
ENSG00000176387	63.3732	-3.18553	0.446199	-7.13926	9.38e-13	5.47e-12
ENSG00000187550	12.7791	-3.18474	0.97954	-3.25126	0.00114893	0.00300415
ENSG00000092758	95.0339	-3.1761	0.377318	-8.41756	3.84e-17	2.84e-16
ENSG00000197261	302.08	-3.16738	0.205042	-15.4474	7.85e-54	1.81e-52
ENSG00000175170	13.1956	-3.16114	0.983228	-3.21507	0.00130415	0.00338327
ENSG00000119681	160.244	-3.15216	0.280001	-11.2577	2.12e-29	2.56e-28
ENSG00000179363	7.71259	-3.14675	1.26613	-2.48532	0.0129434	0.0284554
ENSG00000154099	35.5701	-3.14009	0.59576	-5.27074	1.36e-07	5.42e-07
ENSG00000187193	44.303	-3.13576	0.526816	-5.95229	2.64e-09	1.21e-08
ENSG00000164172	4111.74	-3.13282	0.0714368	-43.8544	0	0
ENSG00000100292	348.595	-3.13075	0.194066	-16.1324	1.51e-58	3.84e-57
ENSG00000005243	10.011	-3.13039	1.09678	-2.85416	0.00431515	0.0103156
ENSG00000131398	264.917	-3.13039	0.218069	-14.3551	9.9e-47	1.95e-45
ENSG00000102032	7.6462	-3.12749	1.26478	-2.47276	0.0134075	0.0293827
ENSG00000147202	210.073	-3.12399	0.247974	-12.598	2.16e-36	3.27e-35
ENSG00000223551	7.32358	-3.12033	1.28084	-2.43616	0.014844	0.0322255
ENSG00000133121	562.653	-3.12017	0.151914	-20.5391	9.63e-94	4.24e-92
ENSG00000099994	250.362	-3.11257	0.240505	-12.9418	2.61e-38	4.16e-37
ENSG00000168546	36.2515	-3.10898	0.587893	-5.28834	1.23e-07	4.93e-07
ENSG00000087258	14.2163	-3.10784	0.931274	-3.33719	0.000846306	0.00225479
ENSG00000157445	6.91981	-3.1008	1.34293	-2.30898	0.0209448	0.0439874
ENSG00000248568	9.51379	-3.09476	1.12895	-2.74128	0.00611995	0.0142874
ENSG00000167653	9.16412	-3.08936	1.17755	-2.62354	0.00870203	0.0197944
ENSG00000230873	4.87762	-3.08899	1.55269	-1.98944	0.0466526	0.0900489
ENSG00000187595	40.8738	-3.08401	0.542783	-5.68185	1.33e-08	5.78e-08
ENSG00000166710	6369.46	-3.07335	0.0619893	-49.5786	0	0
ENSG00000204060	88.1699	-3.06367	0.38951	-7.86544	3.68e-15	2.44e-14
ENSG00000163710	20.8538	-3.0606	0.766616	-3.99235	6.54e-05	0.000199616
ENSG00000164309	189.746	-3.05948	0.255639	-11.968	5.23e-33	7.08e-32
ENSG00000101986	1238.31	-3.05202	0.247588	-12.327	6.48e-35	9.38e-34
ENSG00000168016	129.083	-3.05013	0.307027	-9.9344	2.95e-23	2.88e-22
ENSG00000149582	9.52655	-3.05005	1.11192	-2.74306	0.00608697	0.0142219
ENSG00000038427	80.3218	-3.04937	0.385807	-7.90387	2.7e-15	1.81e-14
ENSG00000140323	43.8565	-3.04715	0.53141	-5.73408	9.8e-09	4.3e-08
ENSG00000148832	31.8832	-3.04274	0.647469	-4.69944	2.61e-06	9.3e-06
ENSG00000185201	689.847	-3.03841	0.143929	-21.1106	6.36e-99	3.04e-97
ENSG00000165215	2494.19	-3.03682	0.0849928	-35.7303	1.34e-279	3.03e-277
ENSG00000179862	39.9595	-3.03474	0.545246	-5.56581	2.61e-08	1.1e-07
ENSG00000182612	19.147	-3.033	0.794905	-3.81555	0.000135881	0.000399691
ENSG00000177614	53.6771	-3.03064	0.46968	-6.45257	1.1e-10	5.56e-10
ENSG00000173269	26.9392	-3.02926	0.702916	-4.30956	1.64e-05	5.36e-05
ENSG00000187140	11.6233	-3.02705	1.03043	-2.93765	0.00330709	0.0080676
ENSG00000197536	23.3651	-3.01979	0.709749	-4.25473	2.09e-05	6.77e-05
ENSG00000155850	2735.58	-3.01535	0.0831496	-36.2642	5.94e-288	1.39e-285
ENSG00000130203	16.1493	-3.01502	0.854863	-3.5269	0.000420453	0.00116989
ENSG00000156427	7.13469	-3.0149	1.28588	-2.34461	0.0190467	0.0403401
ENSG00000177508	1808.64	-3.0142	0.0898069	-33.5631	5.8e-247	1.03e-244
ENSG00000157992	421.781	-3.00992	0.181801	-16.5561	1.45e-61	3.89e-60
ENSG00000107796	36.4901	-2.99401	0.569188	-5.26015	1.44e-07	5.72e-07
ENSG00000065621	759.865	-2.99267	0.131725	-22.7192	2.9e-114	1.64e-112
ENSG00000074657	8.89408	-2.99049	1.14579	-2.60998	0.00905475	0.0205381
ENSG00000160867	740.166	-2.98916	0.133352	-22.4156	2.77e-111	1.53e-109
ENSG00000019144	1247.88	-2.98057	0.10665	-27.9472	7.13e-172	7.01e-170
ENSG00000114805	571.458	-2.97707	0.149612	-19.8986	4.18e-88	1.7e-86
ENSG00000167600	35.2148	-2.97328	0.589704	-5.04198	4.61e-07	1.75e-06
ENSG00000150764	139.794	-2.96297	0.293898	-10.0816	6.66e-24	6.62e-23
ENSG00000176244	107.683	-2.95712	0.33165	-8.9164	4.82e-19	3.93e-18
ENSG00000144749	1765.23	-2.95682	0.0947418	-31.2093	7.97e-214	1.03e-211
ENSG00000214456	199.683	-2.95482	0.248694	-11.8814	1.48e-32	1.97e-31
ENSG00000130829	36.4898	-2.95106	0.588888	-5.01124	5.41e-07	2.04e-06
ENSG00000185215	6.85189	-2.94968	1.29816	-2.27221	0.0230739	0.047995
ENSG00000095321	168.182	-2.94927	0.267586	-11.0218	3e-28	3.48e-27
ENSG00000188130	109.762	-2.94748	0.330798	-8.91022	5.09e-19	4.14e-18
ENSG00000158486	10.7203	-2.94532	1.05405	-2.79428	0.00520158	0.0122826
ENSG00000154277	6.55633	-2.94368	1.31751	-2.23427	0.025465	0.0524312
ENSG00000150667	73.0835	-2.93639	0.404394	-7.26121	3.84e-13	2.28e-12
ENSG00000168124	8.51783	-2.91811	1.16253	-2.51013	0.0120686	0.0266957
ENSG00000183486	33.0363	-2.9152	0.594433	-4.90417	9.38e-07	3.47e-06
ENSG00000087077	4998.68	-2.91354	0.063805	-45.6632	0	0
ENSG00000142619	72.09	-2.91267	0.401273	-7.25859	3.91e-13	2.33e-12
ENSG00000178150	216.453	-2.91205	0.235897	-12.3446	5.21e-35	7.58e-34
ENSG00000198873	20.3668	-2.90812	0.779051	-3.7329	0.000189291	0.000547147
ENSG00000100968	1248.05	-2.90394	0.110541	-26.2703	4.19e-152	3.54e-150
ENSG00000198723	34.3133	-2.9035	0.592574	-4.89981	9.59e-07	3.55e-06
ENSG00000196747	23.5364	-2.8857	0.6946	-4.15447	3.26e-05	0.000103107
ENSG00000109101	72.0058	-2.88475	0.41553	-6.94235	3.86e-12	2.15e-11
ENSG00000106852	52.5928	-2.87868	0.471124	-6.11024	9.95e-10	4.7e-09
ENSG00000115041	44.3332	-2.87765	0.510273	-5.63944	1.71e-08	7.34e-08
ENSG00000225051	6.24647	-2.86791	1.33938	-2.14122	0.0322566	0.0648509
ENSG00000177873	335.858	-2.86456	0.188392	-15.2053	3.26e-52	7.24e-51
ENSG00000177380	1128.93	-2.85531	0.111152	-25.6884	1.58e-145	1.23e-143
ENSG00000132563	92.1954	-2.85068	0.35179	-8.10335	5.35e-16	3.72e-15
ENSG00000169439	840.68	-2.84968	0.125634	-22.6824	6.68e-114	3.75e-112
ENSG00000134668	68.7938	-2.84864	0.406237	-7.01227	2.34e-12	1.33e-11
ENSG00000137474	16.2266	-2.84546	0.852344	-3.3384	0.000842634	0.00224594
ENSG00000126561	6.15303	-2.83759	1.3564	-2.09199	0.0364394	0.0722541
ENSG00000185989	804.9	-2.82175	0.129771	-21.744	7.87e-105	4.04e-103
ENSG00000168754	52.7542	-2.82015	0.474827	-5.93933	2.86e-09	1.31e-08
ENSG00000111341	114.853	-2.81755	0.314622	-8.95535	3.39e-19	2.78e-18
ENSG00000138646	93.0086	-2.81169	0.35384	-7.94621	1.92e-15	1.3e-14
ENSG00000134321	37.2496	-2.80898	0.553519	-5.07478	3.88e-07	1.48e-06
ENSG00000214237	6.28629	-2.80897	1.3397	-2.09672	0.0360185	0.071525
ENSG00000127528	23.48	-2.80555	0.715498	-3.92111	8.81e-05	0.000264989
ENSG00000102038	12.5603	-2.80229	0.953566	-2.93875	0.00329542	0.00804102
ENSG00000099377	824.743	-2.79257	0.125558	-22.2413	1.37e-109	7.45e-108
ENSG00000212195	14.091	-2.79035	0.884919	-3.15322	0.00161478	0.00413389
ENSG00000196331	11.8609	-2.7813	0.964709	-2.88304	0.00393852	0.00947483
ENSG00000178821	55.2342	-2.7729	0.451402	-6.14287	8.1e-10	3.85e-09
ENSG00000134343	9.60388	-2.76527	1.07961	-2.56135	0.0104265	0.0233955
ENSG00000170629	8.26056	-2.76496	1.17632	-2.35051	0.0187476	0.0397415
ENSG00000101417	311.135	-2.76485	0.192546	-14.3595	9.3e-47	1.83e-45
ENSG00000197776	26.4083	-2.76427	0.65667	-4.20953	2.56e-05	8.2e-05
ENSG00000139192	27.7245	-2.76308	0.630759	-4.38057	1.18e-05	3.94e-05
ENSG00000176438	183.019	-2.76139	0.251929	-10.961	5.89e-28	6.74e-27
ENSG00000212747	792.801	-2.7607	0.124643	-22.1489	1.07e-108	5.7e-107
ENSG00000132130	161.979	-2.75708	0.263984	-10.4441	1.56e-25	1.65e-24
ENSG00000182459	74.4138	-2.75265	0.387478	-7.104	1.21e-12	7.01e-12
ENSG00000229391	5.78907	-2.74241	1.36703	-2.00611	0.0448441	0.0868307
ENSG00000187566	129.111	-2.73967	0.297913	-9.1962	3.71e-20	3.16e-19
ENSG00000253846	30.1411	-2.73787	0.62754	-4.36286	1.28e-05	4.26e-05
ENSG00000175567	2542.98	-2.72822	0.0787362	-34.6501	4.45e-263	8.86e-261
ENSG00000182704	3549.05	-2.72796	0.0734048	-37.1632	2.69e-302	6.97e-300
ENSG00000084444	933.307	-2.71217	0.115262	-23.5305	1.99e-122	1.22e-120
ENSG00000197768	40.8734	-2.70509	0.545949	-4.95484	7.24e-07	2.71e-06
ENSG00000129159	8.95912	-2.70154	1.16134	-2.32623	0.0200061	0.0421764
ENSG00000169908	276.152	-2.69704	0.223593	-12.0623	1.67e-33	2.3e-32
ENSG00000107731	595.493	-2.69183	0.141174	-19.0674	4.71e-81	1.74e-79
ENSG00000162636	3255.66	-2.68595	0.075798	-35.4357	4.83e-275	1.05e-272
ENSG00000196890	11.9952	-2.6812	1.00337	-2.6722	0.00753565	0.0173041
ENSG00000213949	16.7352	-2.68011	0.805223	-3.32841	0.000873421	0.00232358
ENSG00000140416	4838.59	-2.67957	0.0633298	-42.3114	0	0
ENSG00000115355	43.5975	-2.67936	0.499971	-5.35902	8.37e-08	3.39e-07
ENSG00000096968	974.547	-2.67621	0.116355	-23.0004	4.62e-117	2.69e-115
ENSG00000008056	7.05172	-2.67356	1.29806	-2.05965	0.0394318	0.0775161
ENSG00000182324	72.5391	-2.6703	0.391763	-6.81612	9.35e-12	5.09e-11
ENSG00000132429	7.56169	-2.6699	1.18797	-2.24744	0.024612	0.0508258
ENSG00000026508	815.013	-2.66938	0.12553	-21.2648	2.41e-100	1.18e-98
ENSG00000003987	96.7295	-2.6685	0.342251	-7.79689	6.35e-15	4.16e-14
ENSG00000124067	102.087	-2.66265	0.328529	-8.10477	5.28e-16	3.67e-15
ENSG00000184012	46.9935	-2.66051	0.50154	-5.30469	1.13e-07	4.53e-07
ENSG00000123096	18.7493	-2.65644	0.757933	-3.50485	0.00045686	0.00126596
ENSG00000143878	6424.8	-2.65563	0.0618201	-42.9573	0	0
ENSG00000269858	306.776	-2.65552	0.201303	-13.1917	9.8e-40	1.62e-38
ENSG00000179715	82.4114	-2.65412	0.365829	-7.25508	4.01e-13	2.39e-12
ENSG00000261764	10.9732	-2.65123	0.991234	-2.67467	0.00748022	0.0171915
ENSG00000196126	45.7441	-2.64824	0.488798	-5.41785	6.03e-08	2.47e-07
ENSG00000203813	102.554	-2.63325	0.3255	-8.08984	5.97e-16	4.14e-15
ENSG00000214282	21.878	-2.62832	0.698692	-3.76177	0.000168713	0.000490366
ENSG00000144452	817.309	-2.6223	0.121101	-21.6538	5.6e-104	2.84e-102
ENSG00000239389	83.2799	-2.61596	0.377417	-6.93123	4.17e-12	2.32e-11
ENSG00000165716	118.249	-2.61301	0.309096	-8.4537	2.82e-17	2.1e-16
ENSG00000233614	8.93054	-2.59954	1.08778	-2.38976	0.0168594	0.0361304
ENSG00000242173	247.379	-2.59841	0.215899	-12.0353	2.32e-33	3.18e-32
ENSG00000184979	589.427	-2.58446	0.14681	-17.6041	2.29e-69	7.07e-68
ENSG00000269516	25.1109	-2.58442	0.694989	-3.71865	0.000200293	0.000577783
ENSG00000166979	33.7361	-2.58161	0.565068	-4.56867	4.91e-06	1.71e-05
ENSG00000171227	22.6291	-2.57584	0.691663	-3.72412	0.000195994	0.000565989
ENSG00000130589	2496.9	-2.5753	0.0824172	-31.2471	2.44e-214	3.19e-212
ENSG00000256018	23.9852	-2.57373	0.684634	-3.75929	0.000170398	0.000494998
ENSG00000149609	8.81005	-2.5731	1.09324	-2.35363	0.018591	0.0394366
ENSG00000260001	26.0928	-2.57043	0.640966	-4.01023	6.07e-05	0.000185714
ENSG00000110799	24.2144	-2.57014	0.682785	-3.7642	0.000167086	0.000485964
ENSG00000100154	136.16	-2.56494	0.281994	-9.09572	9.4e-20	7.88e-19
ENSG00000166289	31.7205	-2.56405	0.578159	-4.43484	9.21e-06	3.11e-05
ENSG00000198832	17.2163	-2.55987	0.786835	-3.25338	0.00114043	0.00298491
ENSG00000178826	14.6645	-2.55866	0.878312	-2.91316	0.00357793	0.00866548
ENSG00000104808	7.02314	-2.54731	1.21843	-2.09065	0.0365592	0.0724383
ENSG00000138028	547.591	-2.537	0.144897	-17.509	1.22e-68	3.71e-67
ENSG00000114854	6.96904	-2.536	1.23277	-2.05715	0.0396719	0.0779239
ENSG00000182179	42.76	-2.5354	0.525058	-4.8288	1.37e-06	5.01e-06
ENSG00000183307	17.685	-2.53534	0.788114	-3.21697	0.00129554	0.00336214
ENSG00000102003	38.4219	-2.53328	0.539079	-4.69927	2.61e-06	9.3e-06
ENSG00000197043	2494.8	-2.53248	0.0812177	-31.1814	1.9e-213	2.45e-211
ENSG00000088002	480.894	-2.53208	0.159423	-15.8827	8.35e-57	2.06e-55
ENSG00000264091	7.22526	-2.53009	1.22844	-2.0596	0.039437	0.0775193
ENSG00000100031	34.5668	-2.52872	0.558077	-4.53113	5.87e-06	2.02e-05
ENSG00000185950	428.959	-2.52524	0.168725	-14.9666	1.21e-50	2.59e-49
ENSG00000149926	45.0787	-2.52514	0.491372	-5.13895	2.76e-07	1.07e-06
ENSG00000147257	9.61482	-2.52229	1.10677	-2.27897	0.0226689	0.0472118
ENSG00000095585	142.381	-2.52012	0.28703	-8.78	1.63e-18	1.3e-17
ENSG00000215187	9.30574	-2.51748	1.1602	-2.16987	0.030017	0.0608074
ENSG00000235721	9.53366	-2.51012	1.10843	-2.26458	0.0235385	0.0488669
ENSG00000166106	74.3418	-2.50862	0.386844	-6.48484	8.88e-11	4.51e-10
ENSG00000171365	334.851	-2.50658	0.181279	-13.8272	1.75e-43	3.19e-42
ENSG00000088882	6.84854	-2.5019	1.22531	-2.04186	0.0411656	0.0805198
ENSG00000117595	516.772	-2.49764	0.147621	-16.9193	3.24e-64	9.09e-63
ENSG00000157388	711.045	-2.49407	0.127462	-19.5672	2.94e-85	1.15e-83
ENSG00000172785	310.592	-2.49151	0.187323	-13.3006	2.3e-40	3.87e-39
ENSG00000058668	828.69	-2.48259	0.119039	-20.8552	1.37e-96	6.25e-95
ENSG00000126803	99.5402	-2.47775	0.326978	-7.57774	3.52e-14	2.21e-13
ENSG00000130518	53.9276	-2.47392	0.445857	-5.54868	2.88e-08	1.21e-07
ENSG00000102781	186.43	-2.47301	0.242858	-10.1829	2.36e-24	2.38e-23
ENSG00000198208	665.136	-2.47294	0.132886	-18.6094	2.69e-77	9.43e-76
ENSG00000140465	11.6417	-2.47131	0.939918	-2.62928	0.00855655	0.019482
ENSG00000139547	66.2654	-2.4713	0.397923	-6.21051	5.28e-10	2.54e-09
ENSG00000187720	2495.57	-2.4697	0.0786523	-31.4002	2.01e-216	2.65e-214
ENSG00000079308	258.916	-2.46791	0.205882	-11.987	4.16e-33	5.65e-32
ENSG00000173559	238.337	-2.46462	0.216667	-11.3752	5.56e-30	6.88e-29
ENSG00000146700	35.0066	-2.46148	0.547249	-4.49791	6.86e-06	2.35e-05
ENSG00000138336	119.153	-2.45549	0.301124	-8.15442	3.51e-16	2.46e-15
ENSG00000122644	390.814	-2.44709	0.169269	-14.4569	2.27e-47	4.56e-46
ENSG00000101347	749.256	-2.44629	0.1256	-19.4768	1.73e-84	6.65e-83
ENSG00000159208	573.758	-2.44606	0.144527	-16.9246	2.97e-64	8.33e-63
ENSG00000113211	27.8084	-2.4456	0.610109	-4.00847	6.11e-05	0.000187002
ENSG00000169047	3010.79	-2.44377	0.072254	-33.8219	9.4e-251	1.71e-248
ENSG00000118495	61.5767	-2.44182	0.413345	-5.90746	3.47e-09	1.58e-08
ENSG00000167723	123.827	-2.44045	0.306168	-7.97094	1.57e-15	1.07e-14
ENSG00000196776	2998.58	-2.43985	0.0738956	-33.0175	4.56e-239	7.48e-237
ENSG00000166997	221.632	-2.43829	0.226564	-10.762	5.2e-27	5.77e-26
ENSG00000137975	28.3852	-2.43731	0.611757	-3.98412	6.77e-05	0.000206369
ENSG00000138162	1254.47	-2.43115	0.0991728	-24.5143	1.04e-132	7.24e-131
ENSG00000198443	8.09689	-2.42962	1.12528	-2.15912	0.0308409	0.0622956
ENSG00000006747	971.534	-2.42007	0.11457	-21.1231	4.87e-99	2.34e-97
ENSG00000012660	4426.87	-2.41914	0.0685491	-35.2906	8.2e-273	1.71e-270
ENSG00000090006	1216.01	-2.41158	0.10728	-22.4794	6.61e-112	3.68e-110
ENSG00000124635	49.2218	-2.4105	0.460656	-5.23275	1.67e-07	6.6e-07
ENSG00000104205	137.946	-2.40507	0.275206	-8.73918	2.35e-18	1.84e-17
ENSG00000075461	1230.02	-2.40478	0.104581	-22.9944	5.3e-117	3.07e-115
ENSG00000131650	429.122	-2.40217	0.161883	-14.8389	8.21e-50	1.73e-48
ENSG00000107104	503.723	-2.39658	0.148644	-16.1229	1.76e-58	4.47e-57
ENSG00000134830	235.69	-2.39479	0.213707	-11.2059	3.81e-29	4.58e-28
ENSG00000204103	90.2363	-2.39433	0.354474	-6.7546	1.43e-11	7.72e-11
ENSG00000136010	9.61376	-2.38602	1.03235	-2.31124	0.0208193	0.0437495
ENSG00000159423	476.229	-2.38429	0.151482	-15.7397	8.08e-56	1.96e-54
ENSG00000178460	60.2304	-2.38314	0.412865	-5.7722	7.82e-09	3.46e-08
ENSG00000176723	20.3672	-2.38015	0.706923	-3.36691	0.000760148	0.00203913
ENSG00000205089	11.2782	-2.37976	0.951127	-2.50204	0.012348	0.0272577
ENSG00000113594	251.09	-2.37646	0.210721	-11.2778	1.69e-29	2.05e-28
ENSG00000164171	3766.29	-2.37273	0.0671718	-35.3233	2.58e-273	5.44e-271
ENSG00000166816	70.0559	-2.37123	0.385437	-6.15207	7.65e-10	3.64e-09
ENSG00000150556	50.4671	-2.37051	0.454566	-5.21488	1.84e-07	7.24e-07
ENSG00000157470	67.8537	-2.36594	0.392498	-6.02791	1.66e-09	7.73e-09
ENSG00000100918	239.412	-2.36164	0.213339	-11.0699	1.76e-28	2.06e-27
ENSG00000134602	2010.96	-2.36069	0.0883415	-26.7223	2.59e-157	2.26e-155
ENSG00000143479	74.9574	-2.35997	0.383038	-6.16119	7.22e-10	3.44e-09
ENSG00000198535	10.9015	-2.35929	0.961324	-2.45421	0.0141194	0.0307765
ENSG00000141655	135.316	-2.35762	0.280274	-8.41184	4.04e-17	2.97e-16
ENSG00000188001	16.433	-2.3531	0.808915	-2.90895	0.00362643	0.00876814
ENSG00000172508	18.0433	-2.34661	0.761682	-3.08082	0.00206428	0.00519852
ENSG00000128536	37.4571	-2.33185	0.525221	-4.43974	9.01e-06	3.05e-05
ENSG00000165388	22.9037	-2.33081	0.663628	-3.51222	0.000444379	0.00123328
ENSG00000133661	17.8687	-2.32893	0.762365	-3.05487	0.00225157	0.00563848
ENSG00000102221	1362.73	-2.31823	0.103398	-22.4205	2.49e-111	1.38e-109
ENSG00000172465	380.187	-2.3142	0.175401	-13.1938	9.53e-40	1.58e-38
ENSG00000164061	100.635	-2.314	0.319635	-7.23951	4.5e-13	2.67e-12
ENSG00000176842	942.95	-2.31351	0.11188	-20.6785	5.41e-95	2.42e-93
ENSG00000267385	7.55834	-2.31322	1.14483	-2.02058	0.043323	0.0841961
ENSG00000123728	3251.82	-2.31104	0.0747399	-30.9211	6.21e-210	7.86e-208
ENSG00000168556	255.539	-2.30836	0.206076	-11.2015	4.01e-29	4.81e-28
ENSG00000124713	10.7937	-2.30318	0.964976	-2.38678	0.0169968	0.0363923
ENSG00000133816	241.112	-2.29773	0.213263	-10.7742	4.56e-27	5.07e-26
ENSG00000167371	273.992	-2.29015	0.203137	-11.2739	1.76e-29	2.13e-28
ENSG00000181788	2942.91	-2.28918	0.0707234	-32.3681	7.73e-230	1.12e-227
ENSG00000104213	112.701	-2.28873	0.302804	-7.55846	4.08e-14	2.56e-13
ENSG00000159247	15.1442	-2.28604	0.837917	-2.72824	0.00636729	0.0148285
ENSG00000100298	10.2296	-2.28466	0.993408	-2.29982	0.0214584	0.0449782
ENSG00000258021	10.417	-2.28074	0.976027	-2.33675	0.0194519	0.0411251
ENSG00000168306	10.6314	-2.28005	0.986413	-2.31146	0.0208075	0.0437289
ENSG00000075073	12.6988	-2.27859	0.924937	-2.46351	0.0137584	0.0300659
ENSG00000197140	58.0876	-2.27828	0.416646	-5.46814	4.55e-08	1.88e-07
ENSG00000103056	145.64	-2.27707	0.270556	-8.41627	3.89e-17	2.87e-16
ENSG00000196976	881.486	-2.275	0.115747	-19.6549	5.25e-86	2.08e-84
ENSG00000118513	2338.76	-2.27488	0.0781208	-29.1201	2e-186	2.14e-184
ENSG00000166446	1660.18	-2.27473	0.0882589	-25.7734	1.76e-146	1.39e-144
ENSG00000268949	10.8335	-2.27161	0.978459	-2.32162	0.0202533	0.04266
ENSG00000204677	7.5711	-2.26548	1.14698	-1.97517	0.0482485	0.0928296
ENSG00000181856	11.0209	-2.26149	1.01643	-2.22493	0.0260856	0.0535809
ENSG00000106336	24.7266	-2.26038	0.636923	-3.5489	0.000386842	0.00108085
ENSG00000162104	750.156	-2.24797	0.125438	-17.921	8.09e-72	2.59e-70
ENSG00000135318	22.5264	-2.2459	0.683669	-3.28507	0.00101955	0.00268577
ENSG00000009694	9.9739	-2.2413	1.00065	-2.23983	0.0251018	0.0517529
ENSG00000182195	1507.15	-2.23622	0.0927768	-24.1032	2.31e-128	1.52e-126
ENSG00000149927	692.204	-2.23357	0.132036	-16.9164	3.41e-64	9.54e-63
ENSG00000118096	1212.78	-2.23354	0.100435	-22.2387	1.45e-109	7.88e-108
ENSG00000166033	87.8294	-2.23128	0.339201	-6.57805	4.77e-11	2.47e-10
ENSG00000233382	31.2344	-2.23085	0.580805	-3.84096	0.000122554	0.000362972
ENSG00000248405	25.6787	-2.22885	0.662049	-3.36659	0.000761042	0.00204102
ENSG00000187889	11.4637	-2.22686	0.926875	-2.40255	0.0162814	0.0350208
ENSG00000100097	1552.84	-2.2224	0.0945701	-23.5	4.08e-122	2.49e-120
ENSG00000129675	159.281	-2.21912	0.253828	-8.74263	2.28e-18	1.79e-17
ENSG00000198440	35.5313	-2.21736	0.531362	-4.17298	3.01e-05	9.55e-05
ENSG00000168421	20.4292	-2.20778	0.708815	-3.11475	0.001841	0.00467287
ENSG00000128408	110.032	-2.20623	0.312261	-7.06534	1.6e-12	9.19e-12
ENSG00000143333	88.7948	-2.19999	0.342077	-6.43127	1.27e-10	6.36e-10
ENSG00000063438	156.159	-2.19242	0.254207	-8.62454	6.43e-18	4.96e-17
ENSG00000105464	32.1726	-2.1924	0.617344	-3.55135	0.000383259	0.00107181
ENSG00000117226	27.9729	-2.19218	0.596786	-3.67331	0.000239428	0.000684435
ENSG00000126262	58.7505	-2.1912	0.414669	-5.28421	1.26e-07	5.04e-07
ENSG00000167191	16.6568	-2.1855	0.772019	-2.83089	0.00464182	0.0110432
ENSG00000179388	1236.66	-2.183	0.0993418	-21.9747	5.03e-107	2.65e-105
ENSG00000174950	8.53666	-2.18184	1.06649	-2.04581	0.0407748	0.0798352
ENSG00000112562	21.02	-2.18077	0.685178	-3.18278	0.00145866	0.00375963
ENSG00000113924	27.1268	-2.18024	0.605449	-3.60103	0.00031696	0.000894776
ENSG00000127124	404.777	-2.17305	0.160572	-13.5332	9.96e-42	1.73e-40
ENSG00000050438	117.792	-2.17295	0.294934	-7.36759	1.74e-13	1.05e-12
ENSG00000198948	478.755	-2.17037	0.151175	-14.3566	9.68e-47	1.91e-45
ENSG00000150593	5246.83	-2.16749	0.0590268	-36.7204	3.45e-295	8.64e-293
ENSG00000225264	16.121	-2.16746	0.811715	-2.67023	0.00757996	0.0173984
ENSG00000197321	1163.73	-2.15315	0.101136	-21.2897	1.41e-100	6.95e-99
ENSG00000112245	20768.5	-2.14594	0.0553196	-38.7917	0	0
ENSG00000237276	13.9318	-2.14396	0.835199	-2.56701	0.010258	0.0230607
ENSG00000187837	205.323	-2.14327	0.224277	-9.55638	1.22e-21	1.11e-20
ENSG00000128335	352.818	-2.14225	0.172607	-12.4112	2.27e-35	3.35e-34
ENSG00000183621	164.923	-2.1417	0.249547	-8.58237	9.29e-18	7.11e-17
ENSG00000226608	167.621	-2.13593	0.246584	-8.66207	4.63e-18	3.59e-17
ENSG00000173275	319.845	-2.1352	0.186555	-11.4454	2.48e-30	3.09e-29
ENSG00000203867	29.6212	-2.13494	0.580896	-3.67526	0.000237609	0.000679416
ENSG00000105467	11.0732	-2.13042	0.937662	-2.27205	0.0230833	0.0480052
ENSG00000138311	9.55631	-2.12631	1.00498	-2.11578	0.0343637	0.0686555
ENSG00000214076	72.6087	-2.12339	0.373225	-5.6893	1.28e-08	5.54e-08
ENSG00000248923	34.1568	-2.11925	0.56174	-3.77265	0.000161526	0.000470621
ENSG00000233406	9.94579	-2.11584	1.01118	-2.09244	0.036399	0.0721873
ENSG00000104783	159.08	-2.11462	0.251686	-8.4018	4.4e-17	3.23e-16
ENSG00000134369	118.149	-2.1116	0.295624	-7.14284	9.14e-13	5.33e-12
ENSG00000152076	41.6334	-2.10914	0.492693	-4.28084	1.86e-05	6.06e-05
ENSG00000146555	91.809	-2.10378	0.339571	-6.1954	5.81e-10	2.79e-09
ENSG00000134470	54.5175	-2.10324	0.428946	-4.90328	9.42e-07	3.49e-06
ENSG00000110446	12.9369	-2.1026	0.887061	-2.3703	0.0177735	0.0378743
ENSG00000133519	50.18	-2.10232	0.450428	-4.66739	3.05e-06	1.08e-05
ENSG00000213398	24.2521	-2.09877	0.633633	-3.31228	0.000925388	0.00245212
ENSG00000181409	44.6927	-2.09616	0.471713	-4.44372	8.84e-06	2.99e-05
ENSG00000105559	464.062	-2.09254	0.149733	-13.9751	2.21e-44	4.14e-43
ENSG00000062282	575.304	-2.08955	0.135461	-15.4255	1.1e-53	2.53e-52
ENSG00000165171	48.3939	-2.08914	0.452538	-4.61649	3.9e-06	1.37e-05
ENSG00000037965	19.2579	-2.08864	0.734011	-2.84551	0.00443402	0.0105828
ENSG00000156500	74.1478	-2.08426	0.364277	-5.72165	1.05e-08	4.61e-08
ENSG00000158373	393.99	-2.08364	0.163569	-12.7386	3.61e-37	5.59e-36
ENSG00000235275	37.884	-2.07621	0.516006	-4.02363	5.73e-05	0.000175833
ENSG00000180592	88.157	-2.0748	0.335514	-6.18395	6.25e-10	2.99e-09
ENSG00000146834	4701.49	-2.07462	0.0607987	-34.1228	3.38e-255	6.38e-253
ENSG00000169122	139.932	-2.07249	0.266016	-7.79084	6.66e-15	4.35e-14
ENSG00000260318	51.7878	-2.07028	0.436502	-4.74289	2.11e-06	7.56e-06
ENSG00000076770	1172.56	-2.06938	0.0995071	-20.7963	4.67e-96	2.11e-94
ENSG00000184898	308.324	-2.06675	0.187601	-11.0167	3.17e-28	3.68e-27
ENSG00000184675	350.399	-2.06455	0.181027	-11.4046	3.96e-30	4.91e-29
ENSG00000184828	14.292	-2.05971	0.82019	-2.51126	0.01203	0.0266186
ENSG00000250504	13.0018	-2.05716	0.952359	-2.16007	0.0307671	0.0621699
ENSG00000125850	323.153	-2.05037	0.178048	-11.5158	1.1e-30	1.39e-29
ENSG00000224324	19.069	-2.05013	0.721672	-2.8408	0.00450001	0.0107225
ENSG00000204052	46.7424	-2.0488	0.461722	-4.4373	9.11e-06	3.08e-05
ENSG00000105639	80.6409	-2.04821	0.350879	-5.83738	5.3e-09	2.37e-08
ENSG00000149922	99.7349	-2.04591	0.314479	-6.50573	7.73e-11	3.95e-10
ENSG00000100867	1344.92	-2.04416	0.0973234	-21.0038	6.06e-98	2.84e-96
ENSG00000054654	2487.01	-2.03639	0.0770682	-26.4232	7.41e-154	6.3e-152
ENSG00000113494	4990.25	-2.03584	0.0624723	-32.5879	6.09e-233	9.22e-231
ENSG00000165675	960.066	-2.03542	0.108991	-18.6752	7.88e-78	2.79e-76
ENSG00000137337	15.9713	-2.03392	0.990498	-2.05343	0.040031	0.0785934
ENSG00000204961	11.6748	-2.03319	0.902366	-2.25317	0.0242481	0.0501562
ENSG00000184160	270.952	-2.03157	0.192725	-10.5413	5.57e-26	5.97e-25
ENSG00000136167	446.974	-2.03016	0.153143	-13.2566	4.13e-40	6.91e-39
ENSG00000182575	24.5045	-2.02714	0.628272	-3.22653	0.001253	0.0032604
ENSG00000088305	600.881	-2.02544	0.132532	-15.2826	9.99e-53	2.25e-51
ENSG00000152086	10.6556	-2.02493	0.95861	-2.11236	0.0346556	0.0691505
ENSG00000143994	24.2089	-2.02101	0.634689	-3.18426	0.00145125	0.00374143
ENSG00000175793	671.661	-2.01844	0.132594	-15.2227	2.5e-52	5.57e-51
ENSG00000187098	97.3957	-2.01761	0.315906	-6.38673	1.69e-10	8.47e-10
ENSG00000176490	80.8783	-2.01578	0.353862	-5.69651	1.22e-08	5.32e-08
ENSG00000111052	60.7761	-2.01257	0.40078	-5.02162	5.12e-07	1.94e-06
ENSG00000252419	12.3049	-2.01233	0.899889	-2.23619	0.025339	0.0522069
ENSG00000064300	28.0459	-2.01105	0.583675	-3.4455	0.000570008	0.00155683
ENSG00000133808	15.2973	-2.01017	0.788759	-2.54852	0.0108181	0.0241783
ENSG00000179698	530.364	-2.00467	0.141683	-14.149	1.89e-45	3.64e-44
ENSG00000025708	40.8342	-2.00404	0.48477	-4.13399	3.57e-05	0.00011225
ENSG00000184925	41.1143	-2.00359	0.494655	-4.05048	5.11e-05	0.000158199
ENSG00000233822	57.3927	-2.00147	0.408987	-4.89374	9.89e-07	3.66e-06
ENSG00000047617	10.9639	-2.00011	1.00036	-1.99939	0.045566	0.0881333
ENSG00000106526	36.4467	-1.99946	0.523984	-3.81588	0.000135696	0.000399203
ENSG00000143429	78.3256	-1.99469	0.355209	-5.61554	1.96e-08	8.38e-08
ENSG00000086300	330.212	-1.99072	0.184671	-10.7798	4.29e-27	4.77e-26
ENSG00000087086	8035.87	-1.98784	0.0604323	-32.8936	2.71e-237	4.42e-235
ENSG00000240204	175.999	-1.98766	0.23647	-8.40556	4.26e-17	3.13e-16
ENSG00000127152	452.345	-1.98469	0.155375	-12.7735	2.3e-37	3.59e-36
ENSG00000101825	100.869	-1.9841	0.31568	-6.28517	3.27e-10	1.6e-09
ENSG00000197360	28.0173	-1.9837	0.587856	-3.37446	0.000739606	0.0019875
ENSG00000267573	12.5051	-1.98327	0.884082	-2.24331	0.0248768	0.0513256
ENSG00000106976	77.8797	-1.98223	0.352026	-5.63092	1.79e-08	7.69e-08
ENSG00000259015	12.478	-1.98	0.890988	-2.22226	0.0262661	0.0539155
ENSG00000105784	29.1452	-1.97939	0.572229	-3.45909	0.000542009	0.00148659
ENSG00000176125	99.5535	-1.97904	0.316871	-6.24559	4.22e-10	2.05e-09
ENSG00000072422	334.874	-1.9704	0.176561	-11.1599	6.41e-29	7.61e-28
ENSG00000170523	17.7261	-1.97015	0.735329	-2.67928	0.00737817	0.0169733
ENSG00000025434	228.337	-1.9691	0.207919	-9.4705	2.79e-21	2.5e-20
ENSG00000132109	596.062	-1.96494	0.133144	-14.758	2.73e-49	5.71e-48
ENSG00000196267	114.481	-1.96432	0.293528	-6.69209	2.2e-11	1.17e-10
ENSG00000172927	37.5973	-1.96361	0.503389	-3.90078	9.59e-05	0.000287106
ENSG00000134363	15.6595	-1.96306	0.816065	-2.40552	0.0161496	0.034772
ENSG00000167676	123.863	-1.96198	0.28777	-6.81787	9.24e-12	5.03e-11
ENSG00000026103	119.676	-1.96024	0.291366	-6.72775	1.72e-11	9.22e-11
ENSG00000102098	296.428	-1.95919	0.183465	-10.6788	1.28e-26	1.4e-25
ENSG00000172428	598.407	-1.9587	0.134635	-14.5482	6e-48	1.22e-46
ENSG00000184083	902.392	-1.95684	0.111728	-17.5143	1.12e-68	3.39e-67
ENSG00000183971	36.5896	-1.95559	0.516085	-3.78928	0.000151086	0.000442301
ENSG00000147119	29.6799	-1.9549	0.565405	-3.45751	0.000545184	0.00149472
ENSG00000158623	761.17	-1.95111	0.120128	-16.2419	2.55e-59	6.56e-58
ENSG00000105516	583.206	-1.9507	0.133691	-14.5911	3.2e-48	6.55e-47
ENSG00000186648	110.995	-1.94594	0.307991	-6.31818	2.65e-10	1.3e-09
ENSG00000161714	1566.24	-1.94554	0.0934905	-20.81	3.51e-96	1.59e-94
ENSG00000187172	205.426	-1.94524	0.220439	-8.82441	1.1e-18	8.82e-18
ENSG00000183508	303.09	-1.94051	0.180962	-10.7234	7.91e-27	8.73e-26
ENSG00000198339	26.4202	-1.93673	0.610273	-3.17355	0.00150589	0.00387346
ENSG00000111199	35.4209	-1.9341	0.520522	-3.7157	0.000202642	0.000584169
ENSG00000118777	16.7312	-1.93276	0.759241	-2.54565	0.0109073	0.0243651
ENSG00000149043	60.2181	-1.93232	0.398459	-4.84947	1.24e-06	4.53e-06
ENSG00000167889	25.2916	-1.93162	0.61625	-3.13447	0.00172164	0.0043901
ENSG00000100605	10725.5	-1.92958	0.0664667	-29.0308	2.69e-185	2.86e-183
ENSG00000241416	14.4509	-1.92943	0.817935	-2.3589	0.0183291	0.0389271
ENSG00000156384	257.73	-1.92564	0.204742	-9.40518	5.19e-21	4.61e-20
ENSG00000124171	8830.58	-1.91912	0.0590604	-32.4942	1.29e-231	1.91e-229
ENSG00000165632	693.102	-1.91776	0.126714	-15.1346	9.58e-52	2.11e-50
ENSG00000268996	15.685	-1.91733	0.778474	-2.46294	0.0137804	0.0301048
ENSG00000103489	858.889	-1.91102	0.112804	-16.9411	2.24e-64	6.31e-63
ENSG00000160460	40.7065	-1.90563	0.483341	-3.94261	8.06e-05	0.000243437
ENSG00000178127	43.8462	-1.90516	0.475712	-4.00485	6.21e-05	0.000189778
ENSG00000168539	68.7197	-1.90491	0.382075	-4.98571	6.17e-07	2.32e-06
ENSG00000115415	8940.2	-1.90409	0.0527379	-36.1047	1.91e-285	4.43e-283
ENSG00000250221	14.0201	-1.90384	0.830532	-2.29231	0.0218876	0.0457531
ENSG00000100583	108.811	-1.90216	0.303417	-6.26914	3.63e-10	1.77e-09
ENSG00000230638	36.5748	-1.90199	0.510615	-3.72491	0.000195385	0.000564305
ENSG00000167114	1187.55	-1.90143	0.098179	-19.367	1.47e-83	5.55e-82
ENSG00000158406	75.4053	-1.90083	0.368018	-5.16505	2.4e-07	9.37e-07
ENSG00000227268	99.4843	-1.89773	0.31285	-6.06595	1.31e-09	6.14e-09
ENSG00000133401	39.5258	-1.89733	0.505698	-3.75191	0.000175493	0.000508904
ENSG00000175536	58.3362	-1.89661	0.405843	-4.67325	2.96e-06	1.05e-05
ENSG00000184271	10.4246	-1.89593	0.963825	-1.96708	0.0491734	0.0944162
ENSG00000160326	88.6417	-1.89448	0.335456	-5.64747	1.63e-08	7.01e-08
ENSG00000132932	17.1733	-1.89253	0.745859	-2.53738	0.0111686	0.0248839
ENSG00000138166	463.131	-1.89166	0.153795	-12.2999	9.07e-35	1.31e-33
ENSG00000019186	18.0179	-1.88711	0.722002	-2.61373	0.00895611	0.0203337
ENSG00000152804	14.2743	-1.88594	0.813862	-2.31728	0.0204887	0.0431264
ENSG00000184182	189.319	-1.88529	0.230622	-8.17483	2.96e-16	2.09e-15
ENSG00000137880	139.021	-1.88523	0.274472	-6.86855	6.49e-12	3.57e-11
ENSG00000223820	12.0752	-1.88329	0.881547	-2.13634	0.0326516	0.0655836
ENSG00000171903	393.181	-1.88172	0.161176	-11.675	1.71e-31	2.21e-30
ENSG00000102575	13.1342	-1.88005	0.843044	-2.23007	0.0257427	0.0529574
ENSG00000160447	332.678	-1.87935	0.174207	-10.788	3.92e-27	4.38e-26
ENSG00000244291	367.896	-1.87885	0.16547	-11.3546	7.03e-30	8.65e-29
ENSG00000165655	262.108	-1.87451	0.194638	-9.63078	5.93e-22	5.5e-21
ENSG00000180573	617.016	-1.87332	0.129712	-14.4421	2.81e-47	5.63e-46
ENSG00000157110	476.597	-1.87175	0.153338	-12.2067	2.86e-34	4.04e-33
ENSG00000156697	1781.91	-1.87091	0.0836945	-22.354	1.1e-110	6.06e-109
ENSG00000235750	838.812	-1.87061	0.113361	-16.5013	3.59e-61	9.53e-60
ENSG00000133466	596.464	-1.86618	0.132495	-14.085	4.7e-45	8.96e-44
ENSG00000147003	35.8616	-1.8656	0.514553	-3.62566	0.00028822	0.000816859
ENSG00000119574	836.81	-1.86554	0.116294	-16.0416	6.54e-58	1.64e-56
ENSG00000213445	34.585	-1.86462	0.53284	-3.49939	0.000466325	0.00129129
ENSG00000131044	10.6247	-1.86434	0.944861	-1.97313	0.0484802	0.0932169
ENSG00000176463	79.9587	-1.85861	0.344551	-5.3943	6.88e-08	2.81e-07
ENSG00000080854	114.572	-1.85835	0.289056	-6.42905	1.28e-10	6.46e-10
ENSG00000099250	1384.35	-1.85769	0.0929682	-19.982	7.9e-89	3.23e-87
ENSG00000154237	93.6161	-1.8558	0.32033	-5.79339	6.9e-09	3.06e-08
ENSG00000213085	56.2121	-1.85421	0.409714	-4.52563	6.02e-06	2.08e-05
ENSG00000221994	276.993	-1.85256	0.187601	-9.875	5.34e-23	5.16e-22
ENSG00000187990	44.6198	-1.85064	0.458858	-4.03315	5.5e-05	0.00016934
ENSG00000123066	6778.5	-1.848	0.0540416	-34.1958	2.79e-256	5.31e-254
ENSG00000104369	314.181	-1.84707	0.182117	-10.1422	3.59e-24	3.59e-23
ENSG00000264644	24.5646	-1.84699	0.621074	-2.97386	0.00294082	0.00723817
ENSG00000188763	12.7181	-1.8464	0.857385	-2.15352	0.0312778	0.0630892
ENSG00000083720	1600.25	-1.84563	0.088381	-20.8827	7.69e-97	3.54e-95
ENSG00000167972	3268.53	-1.84529	0.0738393	-24.9906	7.74e-138	5.58e-136
ENSG00000255353	81.4332	-1.84446	0.343727	-5.36606	8.05e-08	3.26e-07
ENSG00000116771	95.332	-1.8436	0.328503	-5.61212	2e-08	8.54e-08
ENSG00000060762	230.861	-1.84218	0.210461	-8.7531	2.08e-18	1.64e-17
ENSG00000121753	180.385	-1.84133	0.239742	-7.68044	1.59e-14	1.02e-13
ENSG00000271602	26.5892	-1.83865	0.592545	-3.10298	0.00191586	0.00484459
ENSG00000215333	73.1258	-1.83511	0.358901	-5.11314	3.17e-07	1.22e-06
ENSG00000101255	6460.41	-1.82799	0.0559157	-32.6919	2.04e-234	3.25e-232
ENSG00000099219	3203.54	-1.82515	0.0667674	-27.3359	1.59e-164	1.46e-162
ENSG00000160999	87.6132	-1.82439	0.327792	-5.56568	2.61e-08	1.1e-07
ENSG00000145911	3538.71	-1.8223	0.0661078	-27.5656	2.88e-167	2.69e-165
ENSG00000085511	1203.69	-1.82021	0.0962305	-18.9151	8.57e-80	3.1e-78
ENSG00000112964	99.8902	-1.82016	0.319864	-5.69042	1.27e-08	5.51e-08
ENSG00000141622	64.8615	-1.81909	0.380609	-4.77941	1.76e-06	6.35e-06
ENSG00000156504	2623.34	-1.81855	0.0771172	-23.5816	5.95e-123	3.69e-121
ENSG00000151929	2378.26	-1.81706	0.0766182	-23.7158	2.48e-124	1.56e-122
ENSG00000182791	24.3069	-1.81632	0.625193	-2.90521	0.00367007	0.00886868
ENSG00000166529	272.9	-1.81547	0.193773	-9.36907	7.32e-21	6.44e-20
ENSG00000198814	41.9212	-1.81437	0.477677	-3.79832	0.00014568	0.000426998
ENSG00000187266	222.684	-1.81214	0.209274	-8.6592	4.75e-18	3.68e-17
ENSG00000223940	22.1734	-1.81032	0.666314	-2.71692	0.00658934	0.0153042
ENSG00000265417	24.0679	-1.80684	0.65679	-2.75101	0.00594113	0.0139098
ENSG00000025423	27.3273	-1.80329	0.612828	-2.94257	0.00325505	0.00795334
ENSG00000134326	111.061	-1.80125	0.298541	-6.0335	1.6e-09	7.47e-09
ENSG00000178026	343.811	-1.80006	0.174015	-10.3443	4.44e-25	4.6e-24
ENSG00000225784	19.7613	-1.79703	0.788837	-2.27808	0.0227219	0.047304
ENSG00000240356	88.7517	-1.79553	0.331781	-5.41178	6.24e-08	2.56e-07
ENSG00000125347	375.321	-1.79529	0.161924	-11.0873	1.45e-28	1.7e-27
ENSG00000178764	3495.99	-1.79515	0.0662491	-27.097	1.07e-161	9.54e-160
ENSG00000244242	161.895	-1.79342	0.247367	-7.25005	4.17e-13	2.47e-12
ENSG00000122863	34.7822	-1.78575	0.517523	-3.45057	0.00055941	0.00152983
ENSG00000106780	640.045	-1.78424	0.128816	-13.8511	1.25e-43	2.3e-42
ENSG00000157927	25.9822	-1.78422	0.600982	-2.96884	0.00298931	0.0073533
ENSG00000117013	82.7096	-1.78145	0.33955	-5.2465	1.55e-07	6.15e-07
ENSG00000117479	2100.82	-1.78017	0.0816509	-21.8022	2.21e-105	1.14e-103
ENSG00000055130	1991.27	-1.77874	0.0792612	-22.4416	1.55e-111	8.6e-110
ENSG00000162639	1763.77	-1.77686	0.0824793	-21.5432	6.14e-103	3.08e-101
ENSG00000160678	67.6335	-1.7768	0.38448	-4.62131	3.81e-06	1.34e-05
ENSG00000179604	1342.44	-1.77629	0.0997209	-17.8126	5.64e-71	1.77e-69
ENSG00000144485	123.235	-1.77557	0.277663	-6.39469	1.61e-10	8.05e-10
ENSG00000145700	51.4434	-1.77161	0.432942	-4.09202	4.28e-05	0.000133624
ENSG00000167525	158.732	-1.77058	0.26033	-6.8013	1.04e-11	5.62e-11
ENSG00000148450	737.901	-1.76815	0.119381	-14.8111	1.24e-49	2.61e-48
ENSG00000136068	8472.39	-1.76607	0.063207	-27.9411	8.47e-172	8.28e-170
ENSG00000131238	3820.92	-1.76591	0.0641418	-27.5313	7.42e-167	6.91e-165
ENSG00000119632	32.1523	-1.76558	0.537408	-3.28536	0.00101852	0.0026837
ENSG00000215553	17.3172	-1.76301	0.756599	-2.33017	0.0197971	0.0417851
ENSG00000270441	33.0645	-1.76243	0.539652	-3.26586	0.00109131	0.00286375
ENSG00000175175	796.171	-1.76232	0.116484	-15.1294	1.04e-51	2.28e-50
ENSG00000056277	518.438	-1.75913	0.143549	-12.2546	1.59e-34	2.26e-33
ENSG00000170382	21.5151	-1.75837	0.660204	-2.66338	0.00773611	0.017736
ENSG00000176896	122.421	-1.75448	0.28255	-6.20945	5.32e-10	2.56e-09
ENSG00000174586	121.615	-1.752	0.298369	-5.87193	4.31e-09	1.94e-08
ENSG00000167994	173.262	-1.7491	0.240269	-7.27973	3.34e-13	2e-12
ENSG00000164778	100.678	-1.74609	0.305472	-5.71602	1.09e-08	4.76e-08
ENSG00000184678	800.184	-1.74514	0.115765	-15.0749	2.37e-51	5.15e-50
ENSG00000080709	54.966	-1.74385	0.412468	-4.22783	2.36e-05	7.59e-05
ENSG00000261787	33.1433	-1.74203	0.527641	-3.30155	0.000961531	0.00254039
ENSG00000165359	510.978	-1.74031	0.142566	-12.207	2.85e-34	4.02e-33
ENSG00000109775	410.016	-1.73106	0.156739	-11.0442	2.34e-28	2.73e-27
ENSG00000213943	1343.51	-1.72936	0.093528	-18.4903	2.47e-76	8.52e-75
ENSG00000180537	17.7445	-1.7291	0.729317	-2.37085	0.0177474	0.0378299
ENSG00000128564	280.312	-1.72874	0.198923	-8.69049	3.61e-18	2.81e-17
ENSG00000066583	2054.42	-1.72333	0.083609	-20.6118	2.15e-94	9.54e-93
ENSG00000167895	21.9023	-1.72082	0.649256	-2.65044	0.00803859	0.0183688
ENSG00000138185	684.705	-1.72008	0.123185	-13.9634	2.61e-44	4.87e-43
ENSG00000075223	18020	-1.71964	0.0512574	-33.5491	9.29e-247	1.64e-244
ENSG00000165868	88.3208	-1.71747	0.324571	-5.29152	1.21e-07	4.85e-07
ENSG00000213062	99.494	-1.71613	0.305916	-5.60981	2.03e-08	8.65e-08
ENSG00000130707	14139.4	-1.71526	0.0533949	-32.124	2.04e-226	2.85e-224
ENSG00000104983	122.953	-1.71522	0.2758	-6.21909	5e-10	2.41e-09
ENSG00000113369	1538.79	-1.71476	0.0869041	-19.7317	1.15e-86	4.58e-85
ENSG00000158691	313.768	-1.71108	0.176841	-9.67579	3.82e-22	3.57e-21
ENSG00000178053	340.596	-1.71085	0.182851	-9.35653	8.24e-21	7.23e-20
ENSG00000178301	60.1949	-1.71077	0.392698	-4.35646	1.32e-05	4.37e-05
ENSG00000224940	19.0324	-1.71016	0.714138	-2.39472	0.0166329	0.0356983
ENSG00000214194	860.218	-1.70963	0.118969	-14.3703	7.95e-47	1.57e-45
ENSG00000244187	397.31	-1.70962	0.164715	-10.3792	3.08e-25	3.21e-24
ENSG00000197774	2423.95	-1.70913	0.0771012	-22.1674	7.09e-109	3.79e-107
ENSG00000164362	63.1039	-1.70867	0.385813	-4.42875	9.48e-06	3.2e-05
ENSG00000157600	1680.89	-1.70713	0.0847983	-20.1317	3.9e-90	1.63e-88
ENSG00000230445	53.139	-1.70252	0.435942	-3.90539	9.41e-05	0.00028192
ENSG00000134072	22.7358	-1.70194	0.678467	-2.50851	0.0121242	0.0268134
ENSG00000197165	17.3014	-1.70053	0.72569	-2.34332	0.0191128	0.0404678
ENSG00000185875	912.975	-1.69804	0.111263	-15.2615	1.38e-52	3.1e-51
ENSG00000138080	44.8371	-1.69288	0.46102	-3.67203	0.000240633	0.000687513
ENSG00000176855	1591.11	-1.69159	0.0924088	-18.3055	7.49e-75	2.5e-73
ENSG00000239887	647.769	-1.69096	0.124993	-13.5284	1.06e-41	1.85e-40
ENSG00000161082	30.4988	-1.68942	0.563563	-2.99774	0.00271987	0.00673441
ENSG00000267056	55.5647	-1.68877	0.407484	-4.14438	3.41e-05	0.000107504
ENSG00000137338	158.334	-1.68476	0.256724	-6.56254	5.29e-11	2.74e-10
ENSG00000160179	671.484	-1.68377	0.123126	-13.6751	1.43e-42	2.56e-41
ENSG00000105997	16.3904	-1.68372	0.760345	-2.21442	0.0268002	0.0549228
ENSG00000216937	75.0383	-1.67714	0.362512	-4.62643	3.72e-06	1.31e-05
ENSG00000231203	63.5807	-1.67704	0.39983	-4.19437	2.74e-05	8.73e-05
ENSG00000188313	1494.69	-1.67636	0.0891873	-18.796	8.15e-79	2.91e-77
ENSG00000168913	25.4944	-1.67476	0.602037	-2.78182	0.00540548	0.0127361
ENSG00000136824	2692.87	-1.67303	0.0745776	-22.4334	1.86e-111	1.03e-109
ENSG00000163584	1314.63	-1.66989	0.0967236	-17.2646	8.69e-67	2.55e-65
ENSG00000166246	18.9767	-1.66867	0.692258	-2.41048	0.0159317	0.0343614
ENSG00000008086	36.3577	-1.66847	0.504427	-3.30765	0.000940818	0.00249025
ENSG00000163701	223.507	-1.66623	0.216346	-7.70169	1.34e-14	8.67e-14
ENSG00000236893	140.412	-1.6633	0.264972	-6.27727	3.45e-10	1.68e-09
ENSG00000126814	1632.53	-1.66309	0.0855221	-19.4463	3.13e-84	1.2e-82
ENSG00000104447	5763.14	-1.66263	0.0578857	-28.7226	1.99e-181	2.07e-179
ENSG00000204957	15.9596	-1.65822	0.753259	-2.20139	0.0277084	0.056633
ENSG00000066382	249.301	-1.65527	0.196568	-8.42086	3.74e-17	2.76e-16
ENSG00000224520	478.624	-1.65403	0.155532	-10.6347	2.05e-26	2.23e-25
ENSG00000198929	213.141	-1.6514	0.217453	-7.59431	3.09e-14	1.95e-13
ENSG00000173905	1255.63	-1.65085	0.0951504	-17.3499	1.98e-67	5.89e-66
ENSG00000130635	626.237	-1.65081	0.127311	-12.9667	1.89e-38	3.03e-37
ENSG00000113209	35.07	-1.65054	0.510847	-3.23098	0.00123368	0.00321391
ENSG00000167323	449.91	-1.65014	0.15161	-10.8841	1.37e-27	1.55e-26
ENSG00000175048	45.0732	-1.64781	0.450974	-3.65389	0.000258292	0.000735623
ENSG00000111057	44208.5	-1.6446	0.0438405	-37.5132	5.62e-308	1.51e-305
ENSG00000160233	43.5977	-1.64164	0.45921	-3.57492	0.000350337	0.000983963
ENSG00000106290	2041.67	-1.64012	0.0784988	-20.8936	6.12e-97	2.83e-95
ENSG00000169918	24.1141	-1.63991	0.648972	-2.52694	0.0115061	0.025554
ENSG00000106462	2114.21	-1.63849	0.0770617	-21.262	2.55e-100	1.24e-98
ENSG00000177105	679.106	-1.63497	0.124194	-13.1646	1.4e-39	2.31e-38
ENSG00000171914	675.035	-1.6342	0.122719	-13.3166	1.85e-40	3.12e-39
ENSG00000145632	684.688	-1.63346	0.124996	-13.0681	5.01e-39	8.13e-38
ENSG00000008735	30.119	-1.63286	0.553326	-2.95099	0.00316753	0.00775446
ENSG00000107968	60.0384	-1.6306	0.391222	-4.16796	3.07e-05	9.75e-05
ENSG00000149639	3149.25	-1.63032	0.0675848	-24.1226	1.45e-128	9.54e-127
ENSG00000164221	743.838	-1.63011	0.128069	-12.7284	4.11e-37	6.36e-36
ENSG00000049769	217.137	-1.63009	0.232549	-7.00966	2.39e-12	1.35e-11
ENSG00000197903	1042.65	-1.62975	0.10126	-16.0947	2.78e-58	7.01e-57
ENSG00000185052	41.2112	-1.62746	0.481913	-3.37707	0.000732617	0.00197093
ENSG00000108852	198.744	-1.62682	0.219042	-7.42698	1.11e-13	6.85e-13
ENSG00000168274	28.5102	-1.62489	0.574378	-2.82896	0.00466993	0.0111028
ENSG00000134253	738.759	-1.62278	0.125573	-12.9229	3.34e-38	5.3e-37
ENSG00000146802	1443.78	-1.62197	0.0905402	-17.9144	9.11e-72	2.91e-70
ENSG00000075702	1096.94	-1.62132	0.107421	-15.0932	1.79e-51	3.91e-50
ENSG00000170421	167236	-1.61864	0.0454439	-35.6184	7.26e-278	1.59e-275
ENSG00000125434	69.5456	-1.61805	0.362474	-4.46391	8.05e-06	2.74e-05
ENSG00000166313	56.2157	-1.61718	0.410913	-3.93558	8.3e-05	0.000250186
ENSG00000091527	11103.9	-1.61688	0.0503	-32.1448	1.04e-226	1.47e-224
ENSG00000130675	351.529	-1.61676	0.167915	-9.62843	6.07e-22	5.62e-21
ENSG00000101928	567.489	-1.61456	0.139769	-11.5517	7.24e-31	9.18e-30
ENSG00000106004	89.9006	-1.61383	0.31948	-5.05143	4.39e-07	1.67e-06
ENSG00000071282	749.356	-1.61371	0.119706	-13.4806	2.03e-41	3.51e-40
ENSG00000134183	20.1549	-1.61342	0.679299	-2.37512	0.0175433	0.0374542
ENSG00000155629	19.2319	-1.61316	0.714663	-2.25724	0.0239933	0.0496731
ENSG00000126773	1568.78	-1.60454	0.0932636	-17.2044	2.46e-66	7.14e-65
ENSG00000176243	15.1405	-1.60448	0.807844	-1.98612	0.0470196	0.0906839
ENSG00000134597	1303.16	-1.60346	0.0934588	-17.1569	5.58e-66	1.61e-64
ENSG00000169826	584.452	-1.60302	0.130783	-12.2571	1.54e-34	2.19e-33
ENSG00000254285	359.075	-1.60266	0.16495	-9.71601	2.58e-22	2.42e-21
ENSG00000231300	21.5497	-1.6024	0.64643	-2.47884	0.013181	0.0289363
ENSG00000213958	360.913	-1.60107	0.164336	-9.7427	1.98e-22	1.88e-21
ENSG00000120594	764.366	-1.59957	0.116104	-13.777	3.5e-43	6.36e-42
ENSG00000167772	23.5329	-1.59783	0.627925	-2.54461	0.0109399	0.0244252
ENSG00000089775	761.11	-1.59706	0.11866	-13.4591	2.72e-41	4.68e-40
ENSG00000091127	2259.14	-1.59523	0.0766295	-20.8174	3.01e-96	1.37e-94
ENSG00000181544	161.596	-1.5944	0.246587	-6.46587	1.01e-10	5.1e-10
ENSG00000184162	858.785	-1.59319	0.110932	-14.3619	8.98e-47	1.77e-45
ENSG00000176933	54.2389	-1.59101	0.420222	-3.78613	0.000153014	0.000447517
ENSG00000196593	16.1451	-1.5882	0.748437	-2.12202	0.0338358	0.0677386
ENSG00000198502	37.9097	-1.58757	0.493078	-3.21971	0.00128319	0.00333211
ENSG00000170835	18.9073	-1.58593	0.711802	-2.22805	0.0258773	0.0531935
ENSG00000151687	52.3895	-1.58343	0.418061	-3.78755	0.000152139	0.000445263
ENSG00000180185	1661.79	-1.58272	0.0848153	-18.6608	1.03e-77	3.65e-76
ENSG00000204682	100.811	-1.58269	0.301226	-5.25417	1.49e-07	5.91e-07
ENSG00000164105	473.606	-1.58232	0.149792	-10.5635	4.4e-26	4.73e-25
ENSG00000156502	1257.19	-1.58055	0.0939976	-16.8148	1.9e-63	5.28e-62
ENSG00000197483	303.787	-1.57777	0.177577	-8.88495	6.39e-19	5.18e-18
ENSG00000198960	357.517	-1.57668	0.164585	-9.57971	9.73e-22	8.91e-21
ENSG00000164919	16880.3	-1.57603	0.0534917	-29.463	8.58e-191	9.51e-189
ENSG00000100479	392.028	-1.57554	0.161254	-9.77057	1.51e-22	1.43e-21
ENSG00000132016	48.9418	-1.57496	0.44313	-3.55417	0.000379181	0.00106109
ENSG00000236397	20.893	-1.57494	0.676015	-2.32974	0.0198199	0.0418127
ENSG00000127561	187.809	-1.57279	0.223619	-7.03334	2.02e-12	1.15e-11
ENSG00000170604	1263.21	-1.57084	0.0966985	-16.2447	2.43e-59	6.27e-58
ENSG00000125352	456.184	-1.57051	0.150211	-10.4553	1.39e-25	1.47e-24
ENSG00000178752	28.6429	-1.57011	0.567502	-2.76671	0.00566253	0.0132995
ENSG00000198585	550.255	-1.5699	0.13473	-11.6522	2.24e-31	2.87e-30
ENSG00000104889	1492.28	-1.56845	0.0909494	-17.2453	1.21e-66	3.55e-65
ENSG00000213513	45.6155	-1.56703	0.452575	-3.46248	0.000535224	0.00146891
ENSG00000221838	687.485	-1.56594	0.121557	-12.8824	5.66e-38	8.95e-37
ENSG00000185467	31.4712	-1.56224	0.536623	-2.91124	0.00359999	0.00871108
ENSG00000180336	37.7869	-1.56193	0.502119	-3.11068	0.00186658	0.00473153
ENSG00000102393	528.734	-1.56165	0.136522	-11.4388	2.68e-30	3.33e-29
ENSG00000172461	398.49	-1.56139	0.158115	-9.875	5.34e-23	5.16e-22
ENSG00000047644	3127.95	-1.55867	0.067549	-23.0746	8.33e-118	4.88e-116
ENSG00000005187	45.1096	-1.5575	0.464458	-3.35337	0.00079835	0.00213336
ENSG00000132746	2294.8	-1.55493	0.0792247	-19.6269	9.12e-86	3.59e-84
ENSG00000180596	38.7389	-1.55489	0.489704	-3.17516	0.00149755	0.00385386
ENSG00000146918	4466.41	-1.55478	0.0636922	-24.4108	1.31e-131	9.06e-130
ENSG00000105219	16.7738	-1.55471	0.732768	-2.12169	0.033864	0.0677785
ENSG00000118418	700.866	-1.55207	0.131778	-11.778	5.07e-32	6.64e-31
ENSG00000235859	149.201	-1.55188	0.257462	-6.02761	1.66e-09	7.74e-09
ENSG00000185880	442.048	-1.55091	0.154729	-10.0234	1.2e-23	1.18e-22
ENSG00000135245	1455.09	-1.55084	0.0901032	-17.2118	2.16e-66	6.28e-65
ENSG00000228477	27.6082	-1.55047	0.576246	-2.69063	0.00713169	0.0164573
ENSG00000149474	919.572	-1.55006	0.108395	-14.3001	2.19e-46	4.25e-45
ENSG00000174013	2391.13	-1.54549	0.0794128	-19.4615	2.33e-84	8.93e-83
ENSG00000083807	284.698	-1.54412	0.186026	-8.3006	1.04e-16	7.48e-16
ENSG00000089820	197.88	-1.54278	0.216419	-7.12868	1.01e-12	5.89e-12
ENSG00000103642	315.939	-1.5422	0.179728	-8.58073	9.43e-18	7.21e-17
ENSG00000178971	529.361	-1.54211	0.137368	-11.2262	3.03e-29	3.65e-28
ENSG00000144815	374.5	-1.54191	0.164783	-9.35721	8.19e-21	7.18e-20
ENSG00000154330	55.4415	-1.54182	0.408639	-3.77306	0.000161256	0.000469961
ENSG00000091428	95.4147	-1.54097	0.311603	-4.94529	7.6e-07	2.84e-06
ENSG00000168404	446.816	-1.54036	0.147203	-10.4642	1.26e-25	1.34e-24
ENSG00000188549	87.6493	-1.54009	0.325721	-4.72825	2.26e-06	8.11e-06
ENSG00000106327	99.353	-1.53744	0.317521	-4.84201	1.29e-06	4.7e-06
ENSG00000182749	94.9612	-1.53686	0.335122	-4.58596	4.52e-06	1.58e-05
ENSG00000174749	458.221	-1.5345	0.160494	-9.56111	1.16e-21	1.06e-20
ENSG00000162755	227.466	-1.53304	0.204242	-7.50596	6.1e-14	3.8e-13
ENSG00000165125	31.0007	-1.53219	0.581565	-2.63459	0.00842392	0.0192024
ENSG00000140006	695.515	-1.52995	0.125727	-12.1689	4.55e-34	6.39e-33
ENSG00000114353	2710.74	-1.52897	0.0749726	-20.3938	1.9e-92	8.19e-91
ENSG00000115896	37.8109	-1.52719	0.488224	-3.12806	0.00175963	0.00447955
ENSG00000013523	2316.51	-1.52604	0.0758809	-20.111	5.91e-90	2.45e-88
ENSG00000081181	31.6026	-1.52548	0.532242	-2.86614	0.00415515	0.009957
ENSG00000136147	360.343	-1.52494	0.167899	-9.0825	1.06e-19	8.87e-19
ENSG00000164403	77.1484	-1.52459	0.346367	-4.40166	1.07e-05	3.59e-05
ENSG00000128581	949.347	-1.5245	0.105339	-14.4723	1.81e-47	3.65e-46
ENSG00000108175	3259.04	-1.52309	0.0668282	-22.7911	5.62e-115	3.2e-113
ENSG00000134590	897.357	-1.52108	0.118579	-12.8276	1.15e-37	1.81e-36
ENSG00000168661	132.846	-1.52103	0.263711	-5.76779	8.03e-09	3.55e-08
ENSG00000223572	140.993	-1.51985	0.286872	-5.298	1.17e-07	4.69e-07
ENSG00000177989	30.3948	-1.51956	0.576193	-2.63725	0.00835821	0.0190607
ENSG00000135549	4846.32	-1.5163	0.0642182	-23.6117	2.92e-123	1.82e-121
ENSG00000122378	1591.99	-1.51477	0.0862248	-17.5676	4.36e-69	1.34e-67
ENSG00000186868	530.331	-1.51385	0.141345	-10.7103	9.1e-27	1e-25
ENSG00000132661	664.527	-1.51373	0.125176	-12.0928	1.15e-33	1.6e-32
ENSG00000137709	50.5328	-1.51334	0.424053	-3.56874	0.000358698	0.00100674
ENSG00000101400	38.4117	-1.51253	0.492947	-3.06834	0.00215254	0.00540622
ENSG00000242841	28.5186	-1.5124	0.561984	-2.69119	0.00711978	0.0164333
ENSG00000185798	365.444	-1.51233	0.164291	-9.20522	3.41e-20	2.92e-19
ENSG00000167123	1127.47	-1.51081	0.105494	-14.3214	1.61e-46	3.15e-45
ENSG00000184517	801.98	-1.51056	0.113153	-13.3496	1.19e-40	2.01e-39
ENSG00000183018	51.4833	-1.50996	0.437283	-3.45305	0.000554282	0.00151735
ENSG00000250539	154.421	-1.50815	0.25748	-5.85735	4.7e-09	2.11e-08
ENSG00000066735	755.049	-1.50742	0.12781	-11.7942	4.18e-32	5.48e-31
ENSG00000226763	37.4076	-1.50548	0.491933	-3.06034	0.00221084	0.00554876
ENSG00000161860	28.1812	-1.50501	0.568624	-2.64676	0.00812668	0.0185642
ENSG00000174871	78.5001	-1.50395	0.341953	-4.39812	1.09e-05	3.65e-05
ENSG00000138835	714.913	-1.50364	0.120697	-12.458	1.27e-35	1.88e-34
ENSG00000146476	6293.82	-1.50361	0.0645758	-23.2844	6.39e-120	3.82e-118
ENSG00000139890	20.808	-1.50306	0.662632	-2.26832	0.0233096	0.0484336
ENSG00000224791	43.8579	-1.50279	0.46747	-3.21473	0.00130569	0.00338686
ENSG00000165527	3621.69	-1.50214	0.0656079	-22.8958	5.12e-116	2.95e-114
ENSG00000181039	399.28	-1.49998	0.155645	-9.63721	5.57e-22	5.17e-21
ENSG00000119684	1143.61	-1.49911	0.0988021	-15.1729	5.35e-52	1.18e-50
ENSG00000092295	664.74	-1.49555	0.130451	-11.4645	1.99e-30	2.49e-29
ENSG00000101974	1231.75	-1.49439	0.0968851	-15.4244	1.12e-53	2.57e-52
ENSG00000214012	57.6069	-1.49351	0.411118	-3.63279	0.000280369	0.000795656
ENSG00000165568	135.837	-1.49331	0.263989	-5.65671	1.54e-08	6.66e-08
ENSG00000167617	55.479	-1.49016	0.403021	-3.69747	0.000217757	0.000625728
ENSG00000165704	1717.72	-1.48909	0.0891308	-16.7068	1.17e-62	3.2e-61
ENSG00000170837	334.085	-1.48904	0.169212	-8.79987	1.37e-18	1.09e-17
ENSG00000165644	650.368	-1.4862	0.127469	-11.6593	2.06e-31	2.65e-30
ENSG00000161277	141.736	-1.48505	0.253928	-5.84833	4.97e-09	2.23e-08
ENSG00000107742	23.622	-1.48446	0.643163	-2.30806	0.0209957	0.0440856
ENSG00000204434	42.7941	-1.48279	0.461266	-3.21461	0.00130622	0.00338783
ENSG00000215089	25.8463	-1.47985	0.607874	-2.43447	0.0149134	0.0323696
ENSG00000099338	58.359	-1.47982	0.393607	-3.75964	0.000170158	0.000494403
ENSG00000204176	190.656	-1.47761	0.219409	-6.73452	1.64e-11	8.82e-11
ENSG00000196152	164.728	-1.47656	0.238354	-6.19482	5.84e-10	2.8e-09
ENSG00000213066	185.973	-1.47613	0.226604	-6.51415	7.31e-11	3.74e-10
ENSG00000178038	636.62	-1.47415	0.128527	-11.4696	1.88e-30	2.35e-29
ENSG00000096060	1609.83	-1.47057	0.0907107	-16.2116	4.17e-59	1.07e-57
ENSG00000185158	195.281	-1.47034	0.219768	-6.69043	2.23e-11	1.18e-10
ENSG00000250834	54.4968	-1.46875	0.405354	-3.62338	0.000290774	0.000823553
ENSG00000186654	179.763	-1.46831	0.230535	-6.36912	1.9e-10	9.46e-10
ENSG00000196966	26.4229	-1.4682	0.586835	-2.50189	0.0123531	0.0272663
ENSG00000185909	108.941	-1.46716	0.299395	-4.90041	9.56e-07	3.54e-06
ENSG00000182511	47.887	-1.46573	0.432861	-3.38615	0.000708806	0.00191094
ENSG00000068120	1374.84	-1.4657	0.0925925	-15.8296	1.95e-56	4.76e-55
ENSG00000179841	47.7004	-1.46424	0.441433	-3.31701	0.00090987	0.00241189
ENSG00000132359	1201.43	-1.46392	0.0972461	-15.0537	3.26e-51	7.06e-50
ENSG00000102078	290.708	-1.46069	0.185117	-7.89067	3.01e-15	2.01e-14
ENSG00000197208	66.188	-1.45817	0.371299	-3.92723	8.59e-05	0.000258526
ENSG00000102241	3812.34	-1.45787	0.0638542	-22.8313	2.24e-115	1.28e-113
ENSG00000174501	87.6076	-1.45665	0.323326	-4.5052	6.63e-06	2.28e-05
ENSG00000162729	357.318	-1.45621	0.164529	-8.85076	8.69e-19	7e-18
ENSG00000076555	231.631	-1.4556	0.204344	-7.12329	1.05e-12	6.12e-12
ENSG00000175906	24.8542	-1.4555	0.604193	-2.40899	0.0159967	0.034474
ENSG00000156313	186.717	-1.45409	0.227182	-6.40054	1.55e-10	7.75e-10
ENSG00000102362	361.132	-1.45382	0.164027	-8.86329	7.77e-19	6.27e-18
ENSG00000178226	24.6398	-1.45136	0.600543	-2.41674	0.0156601	0.0338401
ENSG00000061938	2209.79	-1.45086	0.0804825	-18.027	1.2e-72	3.86e-71
ENSG00000155066	1775.44	-1.4506	0.0872136	-16.6327	4.04e-62	1.09e-60
ENSG00000214207	34.0365	-1.45017	0.517151	-2.80415	0.00504491	0.0119323
ENSG00000134864	151.558	-1.44979	0.24999	-5.79942	6.65e-09	2.95e-08
ENSG00000251102	18.5695	-1.44782	0.732489	-1.97658	0.0480888	0.0925635
ENSG00000105879	2765.59	-1.44634	0.0739548	-19.5571	3.59e-85	1.4e-83
ENSG00000103540	1643.62	-1.44604	0.0848269	-17.0469	3.68e-65	1.05e-63
ENSG00000123609	250.17	-1.44571	0.20716	-6.9787	2.98e-12	1.67e-11
ENSG00000180530	2227.18	-1.44521	0.0840114	-17.2025	2.54e-66	7.36e-65
ENSG00000048342	397.868	-1.44264	0.155168	-9.29728	1.44e-20	1.25e-19
ENSG00000169871	1357.22	-1.44203	0.090381	-15.955	2.63e-57	6.52e-56
ENSG00000138134	92.5812	-1.44174	0.314587	-4.58296	4.58e-06	1.6e-05
ENSG00000180479	135.477	-1.44141	0.260317	-5.53714	3.07e-08	1.29e-07
ENSG00000184508	385.585	-1.44135	0.16214	-8.88951	6.14e-19	4.98e-18
ENSG00000168237	48.8365	-1.43995	0.427901	-3.36515	0.000765017	0.00204964
ENSG00000240970	30.3907	-1.43822	0.540969	-2.6586	0.00784652	0.0179623
ENSG00000136854	266.187	-1.43809	0.191658	-7.50343	6.22e-14	3.87e-13
ENSG00000169446	1458.28	-1.43746	0.0949577	-15.1379	9.11e-52	2.01e-50
ENSG00000150627	329.092	-1.43642	0.172877	-8.30891	9.66e-17	6.98e-16
ENSG00000140543	315.897	-1.434	0.180274	-7.95454	1.8e-15	1.22e-14
ENSG00000141664	1173.59	-1.43343	0.0954193	-15.0224	5.24e-51	1.13e-49
ENSG00000158089	739.262	-1.43083	0.117759	-12.1505	5.7e-34	7.98e-33
ENSG00000129116	3445.98	-1.42722	0.0695449	-20.5223	1.36e-93	5.97e-92
ENSG00000119608	16.9312	-1.4272	0.721007	-1.97945	0.0477651	0.0919898
ENSG00000156509	17.9366	-1.4238	0.701221	-2.03045	0.0423106	0.0824744
ENSG00000173950	836.015	-1.42349	0.111553	-12.7606	2.72e-37	4.23e-36
ENSG00000107960	652.745	-1.42087	0.126086	-11.2691	1.86e-29	2.25e-28
ENSG00000159388	869.691	-1.42065	0.108371	-13.1091	2.92e-39	4.76e-38
ENSG00000179562	2267.16	-1.41747	0.075379	-18.8045	6.94e-79	2.48e-77
ENSG00000169131	1115.59	-1.41725	0.101058	-14.0241	1.11e-44	2.1e-43
ENSG00000105865	861.919	-1.41669	0.114797	-12.3408	5.46e-35	7.93e-34
ENSG00000086758	11140.9	-1.41493	0.0539244	-26.2392	9.49e-152	7.97e-150
ENSG00000176014	924.187	-1.4141	0.105663	-13.3832	7.58e-41	1.29e-39
ENSG00000160401	56.5823	-1.41326	0.404988	-3.48963	0.000483687	0.00133719
ENSG00000213080	148.85	-1.41285	0.24752	-5.70802	1.14e-08	4.99e-08
ENSG00000049323	3749.58	-1.41244	0.0659057	-21.4312	6.83e-102	3.4e-100
ENSG00000196357	105.671	-1.4106	0.292276	-4.82624	1.39e-06	5.07e-06
ENSG00000151718	783.262	-1.40967	0.116152	-12.1364	6.78e-34	9.47e-33
ENSG00000148154	716.038	-1.40881	0.123848	-11.3753	5.55e-30	6.87e-29
ENSG00000147118	329.073	-1.40736	0.170434	-8.2575	1.49e-16	1.07e-15
ENSG00000198824	884.64	-1.40636	0.10732	-13.1043	3.11e-39	5.06e-38
ENSG00000133937	27.1584	-1.40521	0.596756	-2.35475	0.0185353	0.0393302
ENSG00000087916	348.743	-1.40426	0.165309	-8.49475	1.98e-17	1.49e-16
ENSG00000075886	32.9216	-1.40303	0.522442	-2.68553	0.00724152	0.0166857
ENSG00000076344	29.4897	-1.40244	0.548894	-2.55503	0.0106177	0.0237775
ENSG00000102886	85.4798	-1.4006	0.335286	-4.17734	2.95e-05	9.38e-05
ENSG00000130522	2087.25	-1.39992	0.0884886	-15.8203	2.25e-56	5.51e-55
ENSG00000203950	1438.48	-1.39899	0.0924728	-15.1287	1.05e-51	2.3e-50
ENSG00000165175	1746.51	-1.39698	0.0837014	-16.69	1.55e-62	4.23e-61
ENSG00000173706	91.1886	-1.39634	0.332689	-4.19714	2.7e-05	8.63e-05
ENSG00000087299	1151	-1.39518	0.0973958	-14.3249	1.53e-46	3e-45
ENSG00000114656	42.9745	-1.39449	0.456272	-3.05627	0.00224106	0.00561611
ENSG00000106785	1605.33	-1.39441	0.0843791	-16.5256	2.4e-61	6.4e-60
ENSG00000167646	76.9149	-1.39353	0.341612	-4.07926	4.52e-05	0.000140663
ENSG00000217889	45.8939	-1.39254	0.459179	-3.03268	0.00242391	0.00604195
ENSG00000233560	44.4632	-1.39157	0.447019	-3.113	0.00185195	0.00469711
ENSG00000171084	207.137	-1.39027	0.211537	-6.57222	4.96e-11	2.57e-10
ENSG00000187240	445.1	-1.39022	0.151255	-9.1912	3.88e-20	3.31e-19
ENSG00000135241	1241.03	-1.38955	0.102729	-13.5265	1.09e-41	1.9e-40
ENSG00000083838	310.043	-1.38862	0.183165	-7.58126	3.42e-14	2.16e-13
ENSG00000197852	331.89	-1.38835	0.168235	-8.25242	1.55e-16	1.11e-15
ENSG00000164815	1494.13	-1.38833	0.086464	-16.0568	5.13e-58	1.29e-56
ENSG00000185615	149.434	-1.38831	0.251893	-5.5115	3.56e-08	1.48e-07
ENSG00000184489	452.235	-1.38794	0.145958	-9.50913	1.92e-21	1.74e-20
ENSG00000151914	2939.25	-1.38621	0.0707729	-19.5867	2.01e-85	7.87e-84
ENSG00000063176	247.512	-1.38586	0.194778	-7.11507	1.12e-12	6.49e-12
ENSG00000080546	528.362	-1.38566	0.139963	-9.90023	4.15e-23	4.03e-22
ENSG00000226174	34.8516	-1.38521	0.505107	-2.74242	0.00609886	0.014245
ENSG00000237984	21.8503	-1.38505	0.653099	-2.12073	0.0339447	0.0679336
ENSG00000165169	695.184	-1.38463	0.122456	-11.3072	1.21e-29	1.47e-28
ENSG00000162999	95.3709	-1.38165	0.311494	-4.43554	9.18e-06	3.1e-05
ENSG00000181264	180.021	-1.38131	0.230801	-5.98488	2.17e-09	9.99e-09
ENSG00000198356	2155.89	-1.38115	0.0829878	-16.6428	3.41e-62	9.28e-61
ENSG00000135899	690.628	-1.37949	0.122341	-11.2758	1.73e-29	2.09e-28
ENSG00000241878	1751.08	-1.37941	0.0849417	-16.2395	2.65e-59	6.81e-58
ENSG00000186350	2606.8	-1.37881	0.0764778	-18.0288	1.16e-72	3.74e-71
ENSG00000164323	1639.29	-1.37865	0.0877131	-15.7178	1.14e-55	2.76e-54
ENSG00000166133	342.482	-1.37836	0.168919	-8.15987	3.35e-16	2.36e-15
ENSG00000180423	224.64	-1.37834	0.201795	-6.83039	8.47e-12	4.62e-11
ENSG00000006534	142.902	-1.37775	0.253113	-5.4432	5.23e-08	2.16e-07
ENSG00000146707	34.1108	-1.37547	0.559934	-2.45648	0.0140307	0.0306017
ENSG00000185928	244.537	-1.37448	0.199219	-6.89935	5.22e-12	2.89e-11
ENSG00000107672	1041.08	-1.37422	0.101613	-13.524	1.13e-41	1.96e-40
ENSG00000119986	300.238	-1.37409	0.17615	-7.80066	6.16e-15	4.04e-14
ENSG00000095539	87.6512	-1.37321	0.329	-4.1739	2.99e-05	9.52e-05
ENSG00000091140	6063.43	-1.3726	0.0586467	-23.4046	3.84e-121	2.32e-119
ENSG00000151835	364.06	-1.37241	0.165064	-8.31444	9.22e-17	6.68e-16
ENSG00000139926	1117.66	-1.37176	0.0976558	-14.0469	8.05e-45	1.53e-43
ENSG00000142632	477.755	-1.37165	0.144223	-9.51065	1.89e-21	1.72e-20
ENSG00000146457	1454.36	-1.37157	0.0892316	-15.3709	2.56e-53	5.84e-52
ENSG00000102096	352.827	-1.37108	0.17207	-7.96815	1.61e-15	1.09e-14
ENSG00000160993	586.842	-1.36904	0.13091	-10.4579	1.35e-25	1.43e-24
ENSG00000138587	301.216	-1.3688	0.184542	-7.41726	1.2e-13	7.36e-13
ENSG00000025293	1285.7	-1.36834	0.0918399	-14.8992	3.34e-50	7.06e-49
ENSG00000099365	20.4404	-1.3679	0.667143	-2.05039	0.0403265	0.0790942
ENSG00000171574	336.489	-1.36711	0.166521	-8.20984	2.21e-16	1.57e-15
ENSG00000178660	46.6138	-1.3664	0.504532	-2.70824	0.00676404	0.0156761
ENSG00000005189	433.653	-1.36342	0.149003	-9.15029	5.68e-20	4.8e-19
ENSG00000135249	1003.49	-1.36295	0.101649	-13.4083	5.4e-41	9.24e-40
ENSG00000163357	47.4477	-1.36273	0.437338	-3.11596	0.00183347	0.00465486
ENSG00000055332	5154.99	-1.36173	0.0617198	-22.0631	7.16e-108	3.79e-106
ENSG00000092010	7237.88	-1.36162	0.0538142	-25.3022	3.02e-141	2.25e-139
ENSG00000162775	1027.31	-1.36151	0.104888	-12.9806	1.58e-38	2.53e-37
ENSG00000178502	224.74	-1.36122	0.20173	-6.74771	1.5e-11	8.08e-11
ENSG00000077713	1183.48	-1.36045	0.103693	-13.12	2.53e-39	4.13e-38
ENSG00000234737	34.3795	-1.3604	0.508651	-2.67452	0.00748362	0.0171975
ENSG00000168765	701.285	-1.36036	0.121815	-11.1675	5.88e-29	7e-28
ENSG00000167741	740.151	-1.35914	0.117689	-11.5486	7.5e-31	9.5e-30
ENSG00000178409	623.719	-1.3584	0.125937	-10.7864	3.99e-27	4.46e-26
ENSG00000179988	110.983	-1.35668	0.302627	-4.48302	7.36e-06	2.51e-05
ENSG00000165689	2088.35	-1.35566	0.0766273	-17.6916	4.86e-70	1.51e-68
ENSG00000174721	90.8373	-1.35498	0.319266	-4.24405	2.2e-05	7.08e-05
ENSG00000118058	3182.63	-1.35473	0.0656814	-20.6258	1.61e-94	7.16e-93
ENSG00000158571	20.6134	-1.35421	0.660059	-2.05165	0.0402038	0.0788966
ENSG00000122367	27.1283	-1.35419	0.569462	-2.37801	0.0174062	0.0372022
ENSG00000224287	849.954	-1.35305	0.116721	-11.5922	4.51e-31	5.75e-30
ENSG00000116667	984.096	-1.35167	0.103765	-13.0262	8.68e-39	1.4e-37
ENSG00000152726	93.4471	-1.35106	0.33796	-3.99768	6.4e-05	0.000195366
ENSG00000100490	48.8923	-1.34897	0.440867	-3.05982	0.00221473	0.00555657
ENSG00000156853	569.229	-1.34841	0.130607	-10.3242	5.48e-25	5.64e-24
ENSG00000103196	115.552	-1.34749	0.281073	-4.7941	1.63e-06	5.93e-06
ENSG00000137877	41.0428	-1.34731	0.471661	-2.85652	0.00428316	0.0102421
ENSG00000158483	347.929	-1.34689	0.169171	-7.96168	1.7e-15	1.15e-14
ENSG00000173653	683.846	-1.34467	0.131321	-10.2395	1.32e-24	1.34e-23
ENSG00000168517	60.7054	-1.34411	0.389516	-3.45071	0.000559105	0.00152919
ENSG00000213186	917.453	-1.34387	0.109539	-12.2685	1.34e-34	1.91e-33
ENSG00000162129	683.688	-1.3428	0.123466	-10.8759	1.5e-27	1.7e-26
ENSG00000141510	3496.69	-1.34128	0.0664383	-20.1883	1.24e-90	5.21e-89
ENSG00000124224	297.848	-1.34044	0.182729	-7.33568	2.21e-13	1.33e-12
ENSG00000225308	45.4908	-1.34041	0.444053	-3.01858	0.0025396	0.00631131
ENSG00000137502	566.853	-1.34025	0.131956	-10.1568	3.09e-24	3.11e-23
ENSG00000008282	5016.03	-1.3397	0.0692811	-19.3372	2.61e-83	9.86e-82
ENSG00000134013	30.4253	-1.3395	0.539127	-2.48458	0.0129705	0.0285091
ENSG00000156709	2333.11	-1.33849	0.0760606	-17.5977	2.56e-69	7.9e-68
ENSG00000151006	74.6971	-1.33738	0.351379	-3.80608	0.000141186	0.000414614
ENSG00000177694	544.112	-1.33723	0.137602	-9.71809	2.52e-22	2.38e-21
ENSG00000171161	504.381	-1.33681	0.138636	-9.6426	5.28e-22	4.91e-21
ENSG00000164307	640.28	-1.33638	0.127536	-10.4784	1.09e-25	1.15e-24
ENSG00000106333	253.358	-1.3351	0.196251	-6.80301	1.02e-11	5.56e-11
ENSG00000101003	1609.22	-1.33352	0.0862778	-15.4562	6.86e-54	1.58e-52
ENSG00000101945	449.894	-1.33302	0.152816	-8.72309	2.71e-18	2.11e-17
ENSG00000184254	44.4982	-1.33301	0.450658	-2.95791	0.00309729	0.00759981
ENSG00000131652	934.504	-1.33289	0.105438	-12.6414	1.25e-36	1.9e-35
ENSG00000129680	706.274	-1.3314	0.120695	-11.0311	2.71e-28	3.15e-27
ENSG00000166845	389.57	-1.33064	0.170147	-7.82051	5.26e-15	3.46e-14
ENSG00000006634	2572.26	-1.33056	0.0715817	-18.588	4.02e-77	1.4e-75
ENSG00000100100	223.279	-1.32991	0.205366	-6.47582	9.43e-11	4.79e-10
ENSG00000149548	195.556	-1.3295	0.220818	-6.02078	1.74e-09	8.07e-09
ENSG00000067992	310.383	-1.32949	0.172545	-7.70517	1.31e-14	8.44e-14
ENSG00000177683	1492.26	-1.32936	0.0973028	-13.6621	1.71e-42	3.04e-41
ENSG00000101751	1264.96	-1.32909	0.107865	-12.3218	6.91e-35	9.99e-34
ENSG00000109674	422.698	-1.32847	0.151491	-8.76929	1.8e-18	1.42e-17
ENSG00000186376	756.668	-1.32813	0.116763	-11.3746	5.6e-30	6.91e-29
ENSG00000112186	1317.3	-1.3276	0.0917133	-14.4756	1.73e-47	3.49e-46
ENSG00000198612	698.334	-1.32725	0.120319	-11.0311	2.71e-28	3.15e-27
ENSG00000103657	2320.32	-1.32724	0.0735791	-18.0382	9.76e-73	3.17e-71
ENSG00000100526	1065.17	-1.32706	0.102617	-12.9322	2.96e-38	4.71e-37
ENSG00000180233	694.986	-1.32551	0.125425	-10.5682	4.19e-26	4.5e-25
ENSG00000204745	47.946	-1.32543	0.464622	-2.85272	0.00433473	0.0103608
ENSG00000168564	356.39	-1.3251	0.162529	-8.15299	3.55e-16	2.49e-15
ENSG00000242612	533.53	-1.32251	0.140527	-9.41102	4.91e-21	4.37e-20
ENSG00000160323	342.691	-1.32149	0.165527	-7.98351	1.42e-15	9.69e-15
ENSG00000166128	679.769	-1.32144	0.128798	-10.2598	1.07e-24	1.09e-23
ENSG00000110274	1255.15	-1.31664	0.0940012	-14.0067	1.42e-44	2.67e-43
ENSG00000161243	288.903	-1.31643	0.178449	-7.37704	1.62e-13	9.84e-13
ENSG00000198825	635.542	-1.31637	0.124253	-10.5943	3.17e-26	3.42e-25
ENSG00000153531	429.326	-1.3163	0.161536	-8.14866	3.68e-16	2.58e-15
ENSG00000141391	175.328	-1.3159	0.235461	-5.58861	2.29e-08	9.73e-08
ENSG00000156531	2326.04	-1.31481	0.0769862	-17.0785	2.14e-65	6.14e-64
ENSG00000176472	30.9307	-1.31379	0.553487	-2.37366	0.0176126	0.0375873
ENSG00000105821	3072.04	-1.31327	0.0753835	-17.4212	5.7e-68	1.72e-66
ENSG00000116833	40.2608	-1.31115	0.470233	-2.7883	0.00529847	0.0124936
ENSG00000197021	741.867	-1.30739	0.122376	-10.6833	1.22e-26	1.34e-25
ENSG00000148339	897.778	-1.30694	0.109454	-11.9406	7.27e-33	9.77e-32
ENSG00000101882	875.497	-1.3068	0.109999	-11.8801	1.5e-32	2e-31
ENSG00000119599	1053.26	-1.3068	0.104785	-12.4712	1.07e-35	1.59e-34
ENSG00000117984	7989.68	-1.30635	0.0689507	-18.9462	4.75e-80	1.73e-78
ENSG00000187634	899.917	-1.30592	0.110672	-11.7999	3.91e-32	5.13e-31
ENSG00000117148	20.6116	-1.30573	0.663964	-1.96657	0.0492333	0.0945129
ENSG00000130684	97.0601	-1.30514	0.305944	-4.26594	1.99e-05	6.46e-05
ENSG00000188959	865.482	-1.30281	0.112605	-11.5697	5.87e-31	7.45e-30
ENSG00000214357	875.279	-1.30125	0.109342	-11.9007	1.17e-32	1.57e-31
ENSG00000217241	272.671	-1.30063	0.190534	-6.82625	8.72e-12	4.75e-11
ENSG00000137601	403.832	-1.29996	0.15284	-8.50536	1.81e-17	1.36e-16
ENSG00000070759	146.295	-1.29951	0.248666	-5.22594	1.73e-07	6.84e-07
ENSG00000123154	189.623	-1.29735	0.228383	-5.68056	1.34e-08	5.82e-08
ENSG00000012211	492.945	-1.29621	0.166253	-7.79661	6.36e-15	4.17e-14
ENSG00000165233	604.257	-1.29494	0.127659	-10.1437	3.53e-24	3.54e-23
ENSG00000133247	604.103	-1.29342	0.127457	-10.1479	3.39e-24	3.4e-23
ENSG00000152475	118.001	-1.29271	0.276252	-4.67945	2.88e-06	1.02e-05
ENSG00000103966	1017.83	-1.2916	0.106393	-12.1399	6.49e-34	9.08e-33
ENSG00000198924	1062.22	-1.29016	0.104292	-12.3707	3.77e-35	5.5e-34
ENSG00000120158	1100.72	-1.2899	0.0978989	-13.1758	1.21e-39	2e-38
ENSG00000118707	1711.28	-1.2893	0.0824518	-15.637	4.07e-55	9.63e-54
ENSG00000113580	1837.89	-1.28553	0.0818091	-15.7137	1.22e-55	2.93e-54
ENSG00000119333	2734.75	-1.28471	0.078275	-16.4128	1.55e-60	4.07e-59
ENSG00000041802	2135.66	-1.28444	0.0754619	-17.0211	5.73e-65	1.63e-63
ENSG00000053501	205.031	-1.28406	0.210025	-6.11383	9.73e-10	4.6e-09
ENSG00000128928	2952.16	-1.2823	0.0700745	-18.2991	8.42e-75	2.81e-73
ENSG00000112096	1246.76	-1.28183	0.0951092	-13.4775	2.12e-41	3.66e-40
ENSG00000172361	56.0323	-1.27979	0.396529	-3.22749	0.00124882	0.00324993
ENSG00000186017	439.989	-1.27964	0.150856	-8.48254	2.2e-17	1.65e-16
ENSG00000015285	29.9784	-1.27918	0.546353	-2.34131	0.0192161	0.0406745
ENSG00000269430	39.6009	-1.27841	0.474788	-2.69259	0.00708993	0.0163732
ENSG00000234231	28.798	-1.27803	0.566936	-2.25427	0.0241789	0.0500177
ENSG00000165272	321.083	-1.27674	0.170441	-7.49082	6.84e-14	4.26e-13
ENSG00000003137	31.8957	-1.27657	0.530874	-2.40466	0.0161876	0.0348398
ENSG00000167635	6655.35	-1.27641	0.0623319	-20.4775	3.41e-93	1.49e-91
ENSG00000186638	307.573	-1.27389	0.176861	-7.2028	5.9e-13	3.47e-12
ENSG00000198088	106.848	-1.27379	0.291827	-4.3649	1.27e-05	4.22e-05
ENSG00000135821	2603.8	-1.27366	0.0719012	-17.714	3.27e-70	1.02e-68
ENSG00000165516	1577.6	-1.27095	0.0858834	-14.7986	1.5e-49	3.14e-48
ENSG00000102172	1968.51	-1.27054	0.0818561	-15.5216	2.48e-54	5.8e-53
ENSG00000101412	913.537	-1.27028	0.109294	-11.6226	3.16e-31	4.04e-30
ENSG00000101966	2479.16	-1.26708	0.0860746	-14.7207	4.74e-49	9.86e-48
ENSG00000158813	41.5979	-1.26418	0.46163	-2.73851	0.00617182	0.0143967
ENSG00000115109	2173.88	-1.26298	0.07641	-16.5289	2.27e-61	6.07e-60
ENSG00000105617	206.533	-1.26179	0.210756	-5.98696	2.14e-09	9.87e-09
ENSG00000249064	48.4979	-1.26134	0.425501	-2.96435	0.00303319	0.00745442
ENSG00000226887	70.2706	-1.26064	0.370389	-3.40355	0.000665173	0.00180097
ENSG00000137135	394.349	-1.25982	0.156871	-8.03094	9.67e-16	6.64e-15
ENSG00000114999	1740.56	-1.2598	0.081825	-15.3962	1.74e-53	3.97e-52
ENSG00000141753	6034.66	-1.25967	0.0567881	-22.182	5.13e-109	2.76e-107
ENSG00000128881	257.005	-1.2596	0.190395	-6.61571	3.7e-11	1.94e-10
ENSG00000080823	209.675	-1.25895	0.210719	-5.97455	2.31e-09	1.06e-08
ENSG00000163406	107.129	-1.25857	0.290783	-4.3282	1.5e-05	4.94e-05
ENSG00000105948	528.165	-1.25856	0.136419	-9.2257	2.82e-20	2.42e-19
ENSG00000081177	1628.89	-1.25654	0.0832832	-15.0875	1.96e-51	4.25e-50
ENSG00000122126	2797.05	-1.25647	0.068419	-18.3644	2.53e-75	8.56e-74
ENSG00000139160	70.0725	-1.25516	0.35607	-3.52503	0.000423431	0.00117772
ENSG00000051009	718.086	-1.25497	0.122903	-10.211	1.77e-24	1.79e-23
ENSG00000087510	5323	-1.25373	0.0571593	-21.9339	1.23e-106	6.48e-105
ENSG00000168255	23.1986	-1.25298	0.635928	-1.97032	0.0488017	0.0937596
ENSG00000072121	1522.81	-1.25294	0.0882167	-14.203	8.78e-46	1.7e-44
ENSG00000172382	109.844	-1.24928	0.288024	-4.33743	1.44e-05	4.75e-05
ENSG00000259144	33.2624	-1.2486	0.524352	-2.38122	0.0172555	0.0369095
ENSG00000068615	79.3736	-1.24738	0.341155	-3.65633	0.00025585	0.000729342
ENSG00000147996	178.797	-1.24652	0.24378	-5.1133	3.17e-07	1.22e-06
ENSG00000186889	41.152	-1.24616	0.47215	-2.63932	0.00830718	0.0189544
ENSG00000100532	428.099	-1.24614	0.152486	-8.17215	3.03e-16	2.14e-15
ENSG00000264058	108.452	-1.24496	0.291745	-4.26729	1.98e-05	6.43e-05
ENSG00000145990	293.893	-1.24428	0.180178	-6.90584	4.99e-12	2.77e-11
ENSG00000112414	4163.63	-1.24368	0.0633422	-19.6344	7.87e-86	3.1e-84
ENSG00000254531	37.0942	-1.24284	0.493751	-2.51715	0.0118308	0.0262211
ENSG00000166073	297.214	-1.24212	0.180135	-6.8955	5.37e-12	2.97e-11
ENSG00000241343	230.045	-1.24197	0.203082	-6.1156	9.62e-10	4.55e-09
ENSG00000133985	846.157	-1.24177	0.109169	-11.3747	5.59e-30	6.91e-29
ENSG00000073008	1003.84	-1.24008	0.104542	-11.862	1.86e-32	2.48e-31
ENSG00000162241	203.421	-1.24	0.213398	-5.81072	6.22e-09	2.77e-08
ENSG00000112759	1129.45	-1.23992	0.102564	-12.0892	1.21e-33	1.67e-32
ENSG00000156521	1332.37	-1.23942	0.091764	-13.5066	1.43e-41	2.48e-40
ENSG00000230055	454.097	-1.23934	0.147303	-8.41353	3.98e-17	2.93e-16
ENSG00000061656	24.5363	-1.23807	0.600949	-2.06018	0.0393809	0.0774371
ENSG00000178074	1096.34	-1.23798	0.109038	-11.3537	7.11e-30	8.74e-29
ENSG00000126091	91.2172	-1.23751	0.312493	-3.96013	7.49e-05	0.000227108
ENSG00000142227	37.1158	-1.23749	0.514788	-2.40389	0.0162216	0.0349027
ENSG00000129535	45.0637	-1.23746	0.446276	-2.77285	0.00555679	0.0130754
ENSG00000169239	147.7	-1.2357	0.247915	-4.98436	6.22e-07	2.34e-06
ENSG00000074416	442.019	-1.2356	0.146584	-8.42931	3.48e-17	2.58e-16
ENSG00000261461	129.864	-1.23414	0.264154	-4.67204	2.98e-06	1.06e-05
ENSG00000169188	1107.41	-1.23382	0.0971399	-12.7015	5.8e-37	8.92e-36
ENSG00000106404	177.289	-1.23373	0.228804	-5.39208	6.96e-08	2.84e-07
ENSG00000137124	1223.56	-1.23272	0.0933286	-13.2084	7.85e-40	1.3e-38
ENSG00000176148	297.107	-1.23237	0.177669	-6.93634	4.02e-12	2.24e-11
ENSG00000203883	54.8049	-1.23177	0.40396	-3.04925	0.00229415	0.00574044
ENSG00000204856	341.752	-1.23016	0.16675	-7.37727	1.62e-13	9.82e-13
ENSG00000141579	165.988	-1.22958	0.234966	-5.23302	1.67e-07	6.6e-07
ENSG00000185379	207.057	-1.22914	0.211286	-5.81741	5.98e-09	2.66e-08
ENSG00000198298	288.101	-1.22852	0.178103	-6.8978	5.28e-12	2.92e-11
ENSG00000172336	1419.29	-1.2283	0.0898527	-13.6701	1.53e-42	2.73e-41
ENSG00000160050	47.1808	-1.22568	0.43157	-2.84005	0.00451065	0.0107465
ENSG00000189319	1118.72	-1.22487	0.0978712	-12.5152	6.17e-36	9.23e-35
ENSG00000105939	3229.98	-1.22204	0.0669912	-18.2418	2.4e-74	8e-73
ENSG00000181192	4217.74	-1.22143	0.0609324	-20.0457	2.2e-89	9.08e-88
ENSG00000136932	443.329	-1.22118	0.152047	-8.03161	9.62e-16	6.6e-15
ENSG00000095794	403.744	-1.22066	0.153849	-7.93418	2.12e-15	1.43e-14
ENSG00000085274	895.081	-1.21952	0.111275	-10.9596	5.98e-28	6.84e-27
ENSG00000203711	23.9853	-1.21919	0.61178	-1.99285	0.0462777	0.0894053
ENSG00000126953	483.944	-1.21747	0.139939	-8.70002	3.32e-18	2.59e-17
ENSG00000141068	113.471	-1.21677	0.287584	-4.231	2.33e-05	7.49e-05
ENSG00000198435	842.023	-1.21553	0.11462	-10.6049	2.83e-26	3.05e-25
ENSG00000164104	7932.56	-1.21486	0.0571078	-21.2731	2.01e-100	9.87e-99
ENSG00000121716	219.096	-1.21473	0.205031	-5.92463	3.13e-09	1.43e-08
ENSG00000247746	87.9137	-1.21427	0.318975	-3.80678	0.000140788	0.000413618
ENSG00000018610	706.444	-1.214	0.12425	-9.77058	1.51e-22	1.43e-21
ENSG00000214552	40.4416	-1.21369	0.474723	-2.55662	0.0105695	0.0236819
ENSG00000126778	475.077	-1.21325	0.144895	-8.37335	5.6e-17	4.1e-16
ENSG00000106733	391.706	-1.21259	0.158085	-7.67049	1.71e-14	1.1e-13
ENSG00000123600	828.108	-1.21255	0.110029	-11.0202	3.05e-28	3.54e-27
ENSG00000214309	64.2515	-1.21126	0.378667	-3.19875	0.00138023	0.00356903
ENSG00000171843	318.397	-1.21073	0.171679	-7.05229	1.76e-12	1.01e-11
ENSG00000008300	1147.82	-1.2103	0.100782	-12.009	3.18e-33	4.34e-32
ENSG00000216866	27.12	-1.20952	0.573202	-2.11011	0.0348486	0.0694905
ENSG00000177602	342.613	-1.20918	0.180204	-6.71004	1.95e-11	1.04e-10
ENSG00000124839	821.73	-1.20771	0.118392	-10.201	1.96e-24	1.99e-23
ENSG00000106246	182.796	-1.20759	0.222392	-5.43001	5.64e-08	2.32e-07
ENSG00000160813	567.892	-1.20741	0.133553	-9.04065	1.56e-19	1.29e-18
ENSG00000105227	203.364	-1.2068	0.210561	-5.73135	9.96e-09	4.36e-08
ENSG00000101442	271.567	-1.2068	0.189501	-6.36832	1.91e-10	9.5e-10
ENSG00000144354	726.602	-1.20628	0.120816	-9.98442	1.78e-23	1.75e-22
ENSG00000188486	3898.67	-1.20586	0.0752312	-16.0287	8.06e-58	2.01e-56
ENSG00000100601	566.951	-1.20528	0.131595	-9.15906	5.24e-20	4.43e-19
ENSG00000138180	1886.89	-1.20301	0.0886052	-13.5772	5.47e-42	9.57e-41
ENSG00000116675	230.603	-1.20244	0.197947	-6.07457	1.24e-09	5.83e-09
ENSG00000255561	63.1359	-1.20221	0.376195	-3.19572	0.00139484	0.00360419
ENSG00000185088	1740.42	-1.20056	0.0878364	-13.6682	1.57e-42	2.8e-41
ENSG00000068354	418.919	-1.20013	0.149776	-8.01281	1.12e-15	7.66e-15
ENSG00000186187	1661.2	-1.19993	0.0846795	-14.1703	1.4e-45	2.7e-44
ENSG00000134982	1985.7	-1.19947	0.0775767	-15.4617	6.29e-54	1.45e-52
ENSG00000161031	27.9238	-1.19932	0.563367	-2.12884	0.0332674	0.0667023
ENSG00000119711	1295.36	-1.19922	0.0922178	-13.0042	1.16e-38	1.87e-37
ENSG00000230797	31.2451	-1.19876	0.539042	-2.22387	0.0261573	0.053723
ENSG00000114770	2287.82	-1.19758	0.0730204	-16.4007	1.89e-60	4.96e-59
ENSG00000259529	46.0932	-1.19731	0.43428	-2.75699	0.00583356	0.0136744
ENSG00000006652	3761.2	-1.19715	0.0679808	-17.6102	2.06e-69	6.36e-68
ENSG00000005893	3138.56	-1.19358	0.0695079	-17.1719	4.31e-66	1.25e-64
ENSG00000092969	366.959	-1.1935	0.161516	-7.38939	1.48e-13	9e-13
ENSG00000227184	1376.29	-1.19289	0.0987168	-12.084	1.28e-33	1.78e-32
ENSG00000137700	1540.5	-1.19189	0.0868344	-13.726	7.09e-43	1.28e-41
ENSG00000092964	725.044	-1.19154	0.117498	-10.1409	3.64e-24	3.64e-23
ENSG00000197779	206.992	-1.1908	0.211213	-5.63791	1.72e-08	7.4e-08
ENSG00000177311	1223.57	-1.19079	0.0938522	-12.688	6.9e-37	1.06e-35
ENSG00000133142	3270.16	-1.19043	0.0809065	-14.7137	5.27e-49	1.09e-47
ENSG00000151876	336.233	-1.18686	0.165209	-7.18394	6.77e-13	3.97e-12
ENSG00000145103	95.2168	-1.18603	0.313347	-3.78503	0.000153692	0.000449441
ENSG00000167565	857.962	-1.18446	0.109914	-10.7763	4.46e-27	4.95e-26
ENSG00000197019	534.973	-1.18372	0.134151	-8.82382	1.11e-18	8.86e-18
ENSG00000170632	1727.21	-1.18358	0.0857315	-13.8056	2.36e-43	4.29e-42
ENSG00000138035	2101.19	-1.18292	0.0762815	-15.5074	3.09e-54	7.23e-53
ENSG00000107625	1755.44	-1.18263	0.0815947	-14.494	1.32e-47	2.67e-46
ENSG00000197355	632.208	-1.18178	0.127396	-9.27645	1.75e-20	1.52e-19
ENSG00000143753	275.166	-1.18088	0.183847	-6.42316	1.33e-10	6.71e-10
ENSG00000186862	46.2545	-1.18053	0.440094	-2.68245	0.00730843	0.0168272
ENSG00000196787	127.365	-1.1797	0.26963	-4.37525	1.21e-05	4.03e-05
ENSG00000198521	527.597	-1.1765	0.134095	-8.7736	1.73e-18	1.37e-17
ENSG00000204947	214.843	-1.17597	0.207431	-5.66919	1.43e-08	6.2e-08
ENSG00000183474	219.578	-1.17433	0.211248	-5.55902	2.71e-08	1.15e-07
ENSG00000175602	1414.56	-1.17344	0.0915727	-12.8143	1.36e-37	2.14e-36
ENSG00000226124	61.6899	-1.17322	0.387902	-3.02451	0.00249033	0.00619601
ENSG00000188707	88.1374	-1.17316	0.317169	-3.69885	0.000216578	0.00062259
ENSG00000126249	217.121	-1.17239	0.205761	-5.69781	1.21e-08	5.29e-08
ENSG00000145217	302.625	-1.17222	0.181545	-6.45692	1.07e-10	5.4e-10
ENSG00000140464	1226.82	-1.17219	0.0951786	-12.3157	7.46e-35	1.08e-33
ENSG00000172062	173.951	-1.17206	0.267568	-4.38041	1.18e-05	3.94e-05
ENSG00000235508	63.5739	-1.17201	0.377355	-3.10586	0.00189727	0.00480097
ENSG00000187123	95.7179	-1.17105	0.303222	-3.862	0.000112461	0.00033446
ENSG00000144744	612.364	-1.17051	0.131746	-8.88458	6.42e-19	5.2e-18
ENSG00000131944	183.948	-1.17035	0.226663	-5.16339	2.43e-07	9.45e-07
ENSG00000170191	663.755	-1.16965	0.123638	-9.46026	3.07e-21	2.75e-20
ENSG00000169105	274.516	-1.1694	0.184558	-6.33622	2.35e-10	1.16e-09
ENSG00000169957	2304.19	-1.16785	0.0743933	-15.6983	1.55e-55	3.73e-54
ENSG00000165731	1193.9	-1.16676	0.0940326	-12.4081	2.36e-35	3.47e-34
ENSG00000242013	224.419	-1.16625	0.207789	-5.61266	1.99e-08	8.52e-08
ENSG00000182224	724.1	-1.16596	0.116764	-9.98557	1.76e-23	1.73e-22
ENSG00000197555	3991.92	-1.16548	0.0616318	-18.9104	9.36e-80	3.38e-78
ENSG00000196872	162.609	-1.16536	0.245124	-4.75415	1.99e-06	7.16e-06
ENSG00000086848	116.031	-1.16534	0.276061	-4.2213	2.43e-05	7.81e-05
ENSG00000182909	232.069	-1.16433	0.207678	-5.60642	2.07e-08	8.8e-08
ENSG00000227855	45.8122	-1.16391	0.457232	-2.54557	0.0109101	0.0243687
ENSG00000064195	306.526	-1.16279	0.176503	-6.58796	4.46e-11	2.32e-10
ENSG00000160961	417.22	-1.16271	0.149916	-7.7557	8.79e-15	5.72e-14
ENSG00000110719	332.15	-1.16246	0.171911	-6.76199	1.36e-11	7.35e-11
ENSG00000172301	770.741	-1.16179	0.118216	-9.82769	8.56e-23	8.19e-22
ENSG00000146242	5172.74	-1.16138	0.0578476	-20.0766	1.18e-89	4.89e-88
ENSG00000117877	205.113	-1.16128	0.209546	-5.54189	2.99e-08	1.26e-07
ENSG00000033170	2371.06	-1.16068	0.0739188	-15.7021	1.46e-55	3.52e-54
ENSG00000172331	323.779	-1.16048	0.169068	-6.86396	6.7e-12	3.68e-11
ENSG00000075790	1357.71	-1.16033	0.0971757	-11.9405	7.28e-33	9.77e-32
ENSG00000151748	1078.17	-1.15857	0.105243	-11.0086	3.48e-28	4.02e-27
ENSG00000186298	5426.53	-1.1578	0.0566622	-20.4333	8.46e-93	3.67e-91
ENSG00000141665	61.1506	-1.15717	0.380394	-3.04202	0.00234995	0.00587188
ENSG00000012174	1015.8	-1.15656	0.100642	-11.4918	1.45e-30	1.82e-29
ENSG00000254858	335.945	-1.15631	0.165192	-6.99978	2.56e-12	1.45e-11
ENSG00000067082	685.954	-1.15528	0.121937	-9.4744	2.68e-21	2.41e-20
ENSG00000261652	33.3612	-1.15351	0.512775	-2.24955	0.0244776	0.0505676
ENSG00000232389	129.343	-1.15347	0.266596	-4.32664	1.51e-05	4.98e-05
ENSG00000132330	37.1396	-1.15283	0.48316	-2.38602	0.0170318	0.0364635
ENSG00000256612	25.6848	-1.15281	0.581997	-1.98079	0.0476148	0.0917245
ENSG00000125967	507.842	-1.15262	0.139435	-8.26632	1.38e-16	9.91e-16
ENSG00000139324	1551.52	-1.15095	0.0890172	-12.9295	3.07e-38	4.87e-37
ENSG00000182518	268.531	-1.15066	0.186047	-6.18477	6.22e-10	2.98e-09
ENSG00000184319	88.9645	-1.14983	0.326851	-3.51791	0.00043496	0.00120823
ENSG00000185621	309.561	-1.14908	0.173275	-6.63155	3.32e-11	1.74e-10
ENSG00000240036	33.5064	-1.1484	0.521758	-2.20101	0.0277352	0.0566716
ENSG00000214756	143.108	-1.14813	0.257374	-4.46094	8.16e-06	2.77e-05
ENSG00000105708	324.973	-1.14791	0.170563	-6.73011	1.7e-11	9.08e-11
ENSG00000133678	1010.49	-1.14712	0.101595	-11.2911	1.45e-29	1.76e-28
ENSG00000172456	80.2139	-1.14598	0.331778	-3.45406	0.000552209	0.00151225
ENSG00000118515	35.7205	-1.14582	0.501785	-2.28349	0.0224013	0.0466952
ENSG00000213397	47.6282	-1.14544	0.430408	-2.66128	0.00778436	0.0178371
ENSG00000155858	635.608	-1.14477	0.126963	-9.01654	1.94e-19	1.61e-18
ENSG00000205220	77.6286	-1.14473	0.341941	-3.34775	0.000814719	0.0021744
ENSG00000218226	42.8053	-1.14412	0.453258	-2.52421	0.0115959	0.0257375
ENSG00000168906	16249	-1.14385	0.0459093	-24.9155	5.05e-137	3.64e-135
ENSG00000049883	589.31	-1.14316	0.129952	-8.79677	1.41e-18	1.12e-17
ENSG00000134901	104.049	-1.14311	0.29491	-3.87614	0.000106125	0.000316449
ENSG00000166963	27.2767	-1.14133	0.567088	-2.01262	0.0441548	0.0856194
ENSG00000138381	1969.25	-1.14115	0.0772117	-14.7795	1.99e-49	4.15e-48
ENSG00000171425	813.039	-1.14091	0.11039	-10.3353	4.88e-25	5.04e-24
ENSG00000130520	3021.75	-1.13966	0.0725678	-15.7048	1.4e-55	3.38e-54
ENSG00000106484	2594.89	-1.13914	0.074017	-15.3903	1.9e-53	4.34e-52
ENSG00000225475	30.6144	-1.13876	0.535327	-2.12722	0.033402	0.0669346
ENSG00000179588	349.78	-1.13795	0.16669	-6.82674	8.69e-12	4.74e-11
ENSG00000147654	1650.57	-1.13748	0.0852177	-13.348	1.22e-40	2.05e-39
ENSG00000066629	285.123	-1.13671	0.179791	-6.32238	2.58e-10	1.27e-09
ENSG00000126775	864.349	-1.13669	0.109149	-10.4141	2.14e-25	2.25e-24
ENSG00000102384	239.146	-1.13632	0.19439	-5.84558	5.05e-09	2.26e-08
ENSG00000196083	138.815	-1.13575	0.283659	-4.00392	6.23e-05	0.000190503
ENSG00000147804	405.896	-1.13551	0.161533	-7.02958	2.07e-12	1.18e-11
ENSG00000115318	214.837	-1.13482	0.214855	-5.28178	1.28e-07	5.11e-07
ENSG00000104064	2136.93	-1.13277	0.0754422	-15.015	5.85e-51	1.26e-49
ENSG00000198113	85.0748	-1.13268	0.324135	-3.49447	0.000475008	0.00131426
ENSG00000175449	41.6925	-1.13244	0.459007	-2.46715	0.0136192	0.029807
ENSG00000148985	1005.73	-1.1313	0.103569	-10.9232	8.93e-28	1.01e-26
ENSG00000135436	26.7277	-1.13085	0.567076	-1.99418	0.0461326	0.0891571
ENSG00000105732	593.919	-1.13072	0.128291	-8.81377	1.21e-18	9.67e-18
ENSG00000134146	371.448	-1.12999	0.162408	-6.95773	3.46e-12	1.94e-11
ENSG00000173805	43.876	-1.12993	0.44462	-2.54133	0.0110431	0.0246352
ENSG00000087088	1340.15	-1.12984	0.0964615	-11.7129	1.1e-31	1.42e-30
ENSG00000178096	1312.23	-1.12983	0.0933425	-12.1041	1e-33	1.4e-32
ENSG00000124787	619.6	-1.12936	0.12687	-8.90166	5.5e-19	4.47e-18
ENSG00000119929	233.475	-1.12846	0.197075	-5.72605	1.03e-08	4.5e-08
ENSG00000151287	272.517	-1.12798	0.18896	-5.96938	2.38e-09	1.09e-08
ENSG00000118690	47.0115	-1.12777	0.441489	-2.55447	0.010635	0.0238062
ENSG00000122565	8226.85	-1.12757	0.0587415	-19.1955	4.03e-82	1.51e-80
ENSG00000124743	81.0241	-1.12726	0.339155	-3.32373	0.00088823	0.00236035
ENSG00000072195	267.38	-1.12699	0.189682	-5.94145	2.83e-09	1.29e-08
ENSG00000138074	2254.75	-1.12656	0.0828816	-13.5924	4.44e-42	7.81e-41
ENSG00000197299	1107.71	-1.12603	0.101676	-11.0747	1.66e-28	1.95e-27
ENSG00000001631	1987.04	-1.12532	0.0803656	-14.0025	1.5e-44	2.83e-43
ENSG00000234949	32.0224	-1.12531	0.55295	-2.0351	0.0418405	0.0817062
ENSG00000188706	2253.18	-1.12457	0.0743383	-15.1278	1.06e-51	2.33e-50
ENSG00000157578	131.475	-1.12372	0.269308	-4.17261	3.01e-05	9.57e-05
ENSG00000120149	804.221	-1.12279	0.113059	-9.93103	3.05e-23	2.97e-22
ENSG00000085433	623.97	-1.12205	0.128038	-8.76338	1.89e-18	1.5e-17
ENSG00000181619	59.1886	-1.12179	0.382994	-2.92901	0.00340048	0.00828235
ENSG00000168806	525.474	-1.11969	0.133878	-8.36346	6.09e-17	4.45e-16
ENSG00000113328	3112.57	-1.11913	0.0715391	-15.6437	3.67e-55	8.7e-54
ENSG00000071205	657.062	-1.11824	0.123834	-9.03012	1.71e-19	1.42e-18
ENSG00000156650	1876.89	-1.11704	0.0806321	-13.8535	1.21e-43	2.23e-42
ENSG00000170917	196.35	-1.11612	0.215617	-5.17642	2.26e-07	8.85e-07
ENSG00000164597	1903.74	-1.11553	0.0806298	-13.8352	1.56e-43	2.86e-42
ENSG00000137177	1095.01	-1.11511	0.0969981	-11.4962	1.38e-30	1.73e-29
ENSG00000175274	2180.83	-1.11398	0.0805136	-13.8359	1.55e-43	2.84e-42
ENSG00000087301	420.831	-1.11268	0.154392	-7.20683	5.73e-13	3.37e-12
ENSG00000156050	203.211	-1.11097	0.215139	-5.16394	2.42e-07	9.42e-07
ENSG00000140743	884.025	-1.11087	0.10738	-10.3452	4.4e-25	4.56e-24
ENSG00000172888	878.652	-1.11058	0.115594	-9.60759	7.43e-22	6.83e-21
ENSG00000119927	848.709	-1.10933	0.10861	-10.2139	1.72e-24	1.74e-23
ENSG00000138111	129.385	-1.10837	0.261933	-4.23149	2.32e-05	7.48e-05
ENSG00000105204	812.63	-1.10777	0.118961	-9.31206	1.25e-20	1.09e-19
ENSG00000141401	534.256	-1.10735	0.135821	-8.15303	3.55e-16	2.49e-15
ENSG00000158042	1913.05	-1.10691	0.0800203	-13.8328	1.62e-43	2.96e-42
ENSG00000102218	248.033	-1.10596	0.197727	-5.59338	2.23e-08	9.47e-08
ENSG00000091136	3820.69	-1.10464	0.0627819	-17.5949	2.7e-69	8.3e-68
ENSG00000226421	58.9576	-1.10461	0.384264	-2.8746	0.00404535	0.00971661
ENSG00000128563	1162.43	-1.1042	0.0949874	-11.6247	3.09e-31	3.94e-30
ENSG00000136682	507.133	-1.10401	0.137524	-8.0277	9.93e-16	6.81e-15
ENSG00000083812	273.432	-1.10362	0.188478	-5.85541	4.76e-09	2.14e-08
ENSG00000119669	2929.1	-1.1034	0.0779826	-14.1493	1.89e-45	3.62e-44
ENSG00000244560	158.495	-1.10228	0.239049	-4.61109	4.01e-06	1.4e-05
ENSG00000157259	2698.77	-1.10221	0.0715359	-15.4077	1.45e-53	3.32e-52
ENSG00000106100	205.102	-1.10208	0.2101	-5.24548	1.56e-07	6.18e-07
ENSG00000196678	1520.93	-1.10168	0.0894456	-12.3168	7.36e-35	1.06e-33
ENSG00000182318	202.078	-1.10152	0.212938	-5.17297	2.3e-07	9.01e-07
ENSG00000007080	1282.66	-1.10115	0.0910425	-12.095	1.12e-33	1.56e-32
ENSG00000130299	1057.99	-1.10105	0.0985706	-11.1702	5.71e-29	6.79e-28
ENSG00000100206	67.0375	-1.10067	0.362151	-3.03926	0.00237159	0.00592251
ENSG00000203326	633.822	-1.09895	0.124699	-8.81282	1.22e-18	9.74e-18
ENSG00000172345	232.438	-1.09811	0.199065	-5.51634	3.46e-08	1.45e-07
ENSG00000198331	423.764	-1.09749	0.149926	-7.3202	2.48e-13	1.49e-12
ENSG00000163162	1081.62	-1.09722	0.103124	-10.6398	1.95e-26	2.12e-25
ENSG00000188917	778.853	-1.09513	0.112116	-9.76784	1.55e-22	1.47e-21
ENSG00000166348	961.044	-1.095	0.104899	-10.4386	1.65e-25	1.74e-24
ENSG00000154274	315.673	-1.0947	0.169565	-6.45595	1.08e-10	5.44e-10
ENSG00000186166	423.658	-1.09415	0.147997	-7.39306	1.43e-13	8.77e-13
ENSG00000141933	113.955	-1.09392	0.289553	-3.77798	0.000158106	0.000461407
ENSG00000133597	736.214	-1.09301	0.117219	-9.32445	1.12e-20	9.73e-20
ENSG00000163961	1425.79	-1.09182	0.0881111	-12.3914	2.91e-35	4.26e-34
ENSG00000174371	799.495	-1.0913	0.116322	-9.38172	6.49e-21	5.73e-20
ENSG00000164542	181.477	-1.091	0.222063	-4.913	8.97e-07	3.33e-06
ENSG00000164291	133.971	-1.09095	0.267536	-4.07778	4.55e-05	0.000141462
ENSG00000128951	2301.23	-1.09067	0.0813697	-13.4039	5.74e-41	9.79e-40
ENSG00000189060	17156.5	-1.09042	0.0461177	-23.6443	1.35e-123	8.44e-122
ENSG00000005483	4382.22	-1.09006	0.060681	-17.9639	3.74e-72	1.2e-70
ENSG00000221829	1323.88	-1.08922	0.0901098	-12.0877	1.23e-33	1.7e-32
ENSG00000198554	1793.44	-1.08918	0.0841185	-12.9481	2.41e-38	3.84e-37
ENSG00000122140	1549.36	-1.08796	0.0914261	-11.8999	1.18e-32	1.58e-31
ENSG00000176771	118.285	-1.08793	0.278219	-3.91033	9.22e-05	0.000276412
[truncated: 187 more rows]

## Sheet: LncRNA_p<=0.05 FC>=2
Gene ID	baseMean	log2FoldChange	lfcSE	stat	pvalue	padj
ENSG00000049319	2.70283	4.91414	2.2227	2.21089	0.0270434	0.0863926
ENSG00000144596	96.9207	2.08201	0.320152	6.50319	7.86368e-11	1.42104e-09
ENSG00000170919	107.145	1.0686	0.289326	3.6934	0.000221276	0.00146199
ENSG00000175611	132.303	1.2087	0.261749	4.61778	3.87868e-06	3.69772e-05
ENSG00000180458	4.1662	3.98128	1.9504	2.04126	0.041225	0.1202
ENSG00000185904	36.3075	8.65705	1.51308	5.72146	1.05611e-08	1.42076e-07
ENSG00000186019	267.155	1.44562	0.191368	7.55411	4.21747e-14	1.0807e-12
ENSG00000186369	6.8985	6.25871	1.78708	3.50219	0.000461444	0.00282883
ENSG00000186594	95.0374	2.59949	0.339827	7.64945	2.01841e-14	5.31258e-13
ENSG00000189196	79.3655	4.83706	0.531529	9.10027	9.01039e-20	3.40916e-18
ENSG00000196566	25.3777	3.23892	0.701642	4.6162	3.90822e-06	3.71857e-05
ENSG00000196696	926.448	1.48672	0.109016	13.6376	2.3931e-42	2.63404e-40
ENSG00000197813	70.3308	2.58122	0.402141	6.41868	1.37458e-10	2.37753e-09
ENSG00000203280	20.4532	2.11579	0.735257	2.87762	0.00400682	0.0182207
ENSG00000203635	105.487	1.54606	0.298005	5.18805	2.12509e-07	2.4216e-06
ENSG00000203721	52.5951	6.73557	1.08965	6.18139	6.35404e-10	1.01896e-08
ENSG00000204792	9.97456	3.19755	1.11417	2.86989	0.00410613	0.0186024
ENSG00000205054	3.75328	5.39593	2.06702	2.61049	0.00904126	0.0354549
ENSG00000205488	47.0528	2.48728	0.479385	5.18848	2.12022e-07	2.4216e-06
ENSG00000212766	13.4212	1.67579	0.83541	2.00595	0.0448616	0.128711
ENSG00000213904	53.2483	1.02614	0.407322	2.51922	0.0117614	0.043782
ENSG00000213971	70.8088	1.0344	0.353653	2.9249	0.00344563	0.0161334
ENSG00000215386	96.3361	1.27572	0.313001	4.07578	4.58613e-05	0.00035537
ENSG00000215533	2.6697	4.88163	2.25641	2.16345	0.0305065	0.0950728
ENSG00000215863	2.25737	4.65048	2.34399	1.984	0.0472554	0.134149
ENSG00000223523	54.8218	7.80494	1.47275	5.29957	1.16079e-07	1.37787e-06
ENSG00000223759	94.7673	2.68882	0.343463	7.82856	4.9347e-15	1.35788e-13
ENSG00000223779	83.46	3.59303	0.418429	8.58694	8.93176e-18	2.92274e-16
ENSG00000223804	25.5696	4.32626	0.852519	5.07468	3.88153e-07	4.28206e-06
ENSG00000223813	70.8726	1.0111	0.354843	2.84944	0.00437959	0.0195848
ENSG00000223855	105.67	1.85603	0.303347	6.11853	9.4445e-10	1.45668e-08
ENSG00000223901	82.1466	1.60935	0.343359	4.68707	2.77139e-06	2.70601e-05
ENSG00000223947	83.9179	5.40183	0.597278	9.04408	1.5093e-19	5.62271e-18
ENSG00000224057	18.3579	6.22114	1.56468	3.97599	7.00877e-05	0.000525441
ENSG00000224081	9.87704	4.2887	1.34715	3.18353	0.00145489	0.00771746
ENSG00000224093	36.0145	1.73956	0.509836	3.412	0.000644893	0.0038088
ENSG00000224220	74.2875	1.28792	0.363482	3.54329	0.000395163	0.00246939
ENSG00000224259	2.4801	4.78833	2.27807	2.10192	0.0355599	0.107501
ENSG00000224407	358.38	1.57755	0.165829	9.51311	1.85044e-21	7.7256e-20
ENSG00000224621	2.25737	4.65048	2.34399	1.984	0.0472554	0.134149
ENSG00000224652	75.1728	1.34073	0.349059	3.84099	0.000122537	0.000867614
ENSG00000224848	14.3719	7.32332	1.61506	4.53438	5.77725e-06	5.30915e-05
ENSG00000224897	146.352	1.91399	0.270355	7.07953	1.44645e-12	3.01947e-11
ENSG00000224899	21.8803	4.83527	1.02067	4.73735	2.16527e-06	2.15769e-05
ENSG00000224950	22.3397	1.40345	0.6364	2.2053	0.0274332	0.087235
ENSG00000225135	55.0911	1.22457	0.410334	2.98433	0.00284201	0.0136817
ENSG00000225177	169.838	2.67923	0.259683	10.3173	5.88378e-25	2.8213e-23
ENSG00000225205	35.6926	3.12086	0.593279	5.26037	1.43767e-07	1.6697e-06
ENSG00000225214	8.17228	5.00852	1.71268	2.92438	0.00345144	0.0161334
ENSG00000225234	17.5922	1.94301	0.745269	2.60713	0.00913045	0.0357468
ENSG00000225265	55.3773	1.04993	0.399109	2.63068	0.0085213	0.0337162
ENSG00000225535	4.86386	5.75419	1.91446	3.00565	0.00265013	0.0129511
ENSG00000225643	2.98876	5.05669	2.1575	2.34377	0.0190899	0.0652451
ENSG00000225782	17.4908	1.67792	0.72647	2.30969	0.0209055	0.0703544
ENSG00000225953	53.9431	1.17493	0.4089	2.87338	0.00406102	0.0184326
ENSG00000226017	22.8307	5.5033	1.16971	4.70483	2.54076e-06	2.50609e-05
ENSG00000226031	5.62839	5.97317	1.85772	3.21532	0.001303	0.00697286
ENSG00000226067	78.3238	2.40026	0.367201	6.53663	6.29224e-11	1.14561e-09
ENSG00000226137	675.706	1.71788	0.12476	13.7695	3.88929e-43	4.38042e-41
ENSG00000226308	18.6971	7.70421	1.57854	4.8806	1.05766e-06	1.10155e-05
ENSG00000226352	65.5763	1.45181	0.3734	3.88808	0.00010104	0.000729263
ENSG00000226455	4.54787	5.66959	1.95622	2.89824	0.00375262	0.0172756
ENSG00000226598	14.818	5.89406	1.58962	3.70785	0.00020903	0.00139825
ENSG00000226686	10.2109	2.57738	1.01613	2.53646	0.011198	0.0422696
ENSG00000226733	8.52081	6.56699	1.72346	3.81036	0.000138766	0.000962812
ENSG00000226747	4.16561	5.53872	1.98335	2.7926	0.00522856	0.0227116
ENSG00000226756	7.09176	4.79761	1.74948	2.7423	0.00610099	0.0257379
ENSG00000226891	11.5496	5.53355	1.63955	3.37504	0.000738054	0.00426539
ENSG00000226963	10.4293	3.29227	1.10401	2.98211	0.00286273	0.0137522
ENSG00000227028	34.3194	1.1447	0.510465	2.24247	0.0249312	0.0805737
ENSG00000227036	22.8698	4.16071	0.864535	4.81265	1.48941e-06	1.50904e-05
ENSG00000227039	47.5608	3.21431	0.516011	6.22915	4.68964e-10	7.69895e-09
ENSG00000227121	4.06928	5.49804	1.99249	2.75938	0.00579113	0.0246454
ENSG00000227192	11.0409	5.46724	1.64861	3.31628	0.000912229	0.0051252
ENSG00000227220	4.03921	5.49976	2.01669	2.72711	0.0063891	0.0267437
ENSG00000227227	181.209	1.56089	0.229124	6.81243	9.59612e-12	1.86643e-10
ENSG00000227278	39.8554	1.64392	0.519105	3.16684	0.00154108	0.00810362
ENSG00000227354	29.5665	1.49106	0.558693	2.66884	0.00761128	0.0307691
ENSG00000227388	14.086	7.29483	1.61892	4.50599	6.60657e-06	5.96933e-05
ENSG00000227392	22.4326	4.10367	0.867205	4.73206	2.2225e-06	2.21018e-05
ENSG00000227482	21.184	6.42404	1.54393	4.16083	3.17096e-05	0.000254676
ENSG00000227640	19.2659	7.74183	1.57332	4.92068	8.62421e-07	9.11945e-06
ENSG00000227678	11.6068	3.09273	1.01524	3.04631	0.00231666	0.0115073
ENSG00000227954	13.9265	7.27722	1.61977	4.49275	7.03103e-06	6.34097e-05
ENSG00000228033	4.57793	5.66797	1.93856	2.9238	0.00345787	0.0161334
ENSG00000228044	42.2218	8.87538	1.50323	5.90421	3.54332e-09	5.04715e-08
ENSG00000228065	33.1261	8.52285	1.52175	5.60069	2.13502e-08	2.79822e-07
ENSG00000228172	188.741	1.67156	0.225326	7.41841	1.18537e-13	2.84194e-12
ENSG00000228204	59.3264	1.07255	0.406474	2.63868	0.00832298	0.0330938
ENSG00000228288	63.1072	1.48404	0.383598	3.86872	0.000109407	0.000783812
ENSG00000228404	6.63041	2.51419	1.27089	1.97828	0.0478966	0.135413
ENSG00000228509	109.282	1.3223	0.290379	4.5537	5.27104e-06	4.90916e-05
ENSG00000228613	68.4153	1.57515	0.378073	4.16627	3.09629e-05	0.000249506
ENSG00000228620	8.26831	2.92562	1.1884	2.46182	0.0138234	0.0500722
ENSG00000228624	15.2181	2.08496	0.819024	2.54566	0.0109072	0.0413979
ENSG00000228643	4.87379	4.25026	1.88275	2.25747	0.0239784	0.0780163
ENSG00000228791	5.68196	2.77179	1.38811	1.99681	0.0458459	0.131224
ENSG00000228933	8.42755	6.55841	1.73928	3.77077	0.000162746	0.00111168
ENSG00000228952	37.3719	2.10849	0.51839	4.06738	4.75447e-05	0.000367239
ENSG00000229017	8.34114	5.06254	1.70919	2.96196	0.00305691	0.0145288
ENSG00000229021	18.6391	1.88474	0.744761	2.53067	0.0113846	0.0428371
ENSG00000229124	272.322	2.39996	0.199265	12.0441	2.08431e-33	1.48446e-31
ENSG00000229127	10.4968	2.62289	1.00715	2.60426	0.00920725	0.0360183
ENSG00000229312	2.89243	4.9997	2.19337	2.27946	0.0226399	0.0748394
ENSG00000229348	13.3836	2.75066	0.921679	2.9844	0.00284132	0.0136817
ENSG00000229404	78.084	1.26578	0.343128	3.68894	0.000225192	0.0014818
ENSG00000229666	22.5062	2.2181	0.725071	3.05914	0.0022197	0.0110483
ENSG00000229807	87.4735	6.88481	0.884916	7.78019	7.24162e-15	1.97029e-13
ENSG00000229867	266.165	1.05359	0.188126	5.60046	2.13781e-08	2.79822e-07
ENSG00000229891	14.7775	1.59945	0.788904	2.02743	0.0426184	0.123519
ENSG00000229931	36.9949	1.84988	0.515196	3.59063	0.000329874	0.00210208
ENSG00000229953	128.593	3.72941	0.343859	10.8457	2.08927e-27	1.19039e-25
ENSG00000229956	11.271	3.84264	1.1582	3.31776	0.000907411	0.00510999
ENSG00000229989	9.13035	2.38951	1.05565	2.26355	0.0236015	0.077089
ENSG00000230126	5.43938	4.40157	1.83572	2.39774	0.0164966	0.0583162
ENSG00000230140	22.388	4.12397	0.864083	4.77266	1.81812e-06	1.8268e-05
ENSG00000230316	81.783	4.75001	0.513851	9.24395	2.37569e-20	9.27861e-19
ENSG00000230408	301.26	1.03278	0.185203	5.57648	2.45428e-08	3.18662e-07
ENSG00000230487	1165.71	1.63849	0.0980111	16.7173	9.79876e-63	2.06328e-60
ENSG00000230628	136.077	10.5639	1.46213	7.22502	5.01025e-13	1.10294e-11
ENSG00000230836	12.9044	2.94859	0.953574	3.09214	0.00198718	0.0100563
ENSG00000230955	44.3778	1.21186	0.466537	2.59756	0.00938881	0.0365515
ENSG00000231131	248.787	4.61413	0.289665	15.9292	3.97448e-57	6.96008e-55
ENSG00000231160	56.7128	2.40597	0.428953	5.60894	2.03574e-08	2.6864e-07
ENSG00000231185	6.49043	3.59058	1.48056	2.42514	0.0153023	0.054774
ENSG00000231194	64.8097	1.13281	0.378518	2.99274	0.00276488	0.0133769
ENSG00000231312	117.106	2.19691	0.294088	7.47025	8.00452e-14	2.00859e-12
ENSG00000231437	162.862	5.65279	0.456298	12.3884	3.02142e-35	2.39881e-33
ENSG00000231551	6.76247	3.05192	1.31777	2.31598	0.0205595	0.069435
ENSG00000231703	5.75479	6.00106	1.84531	3.25206	0.0011457	0.00621348
ENSG00000231764	5.30932	5.88289	1.87626	3.13543	0.00171603	0.00886951
ENSG00000231776	10.4934	4.32654	1.34446	3.21804	0.00129068	0.00691454
ENSG00000231789	43.0827	8.90623	1.5022	5.92879	3.05171e-09	4.37262e-08
ENSG00000231969	171.558	1.05876	0.24115	4.39046	1.13113e-05	9.87034e-05
ENSG00000232021	11.4764	6.99336	1.65766	4.21882	2.45581e-05	0.000201927
ENSG00000232104	8.41285	2.53274	1.14219	2.21745	0.0265922	0.0852324
ENSG00000232151	9.26697	3.0596	1.15103	2.65813	0.00785744	0.0315536
ENSG00000232284	11.292	2.47213	0.972077	2.54314	0.0109862	0.0416325
ENSG00000232316	6.01065	6.07112	1.84338	3.29347	0.00098959	0.00545852
ENSG00000232533	41.3884	1.01804	0.460048	2.2129	0.0269047	0.08612
ENSG00000232586	52.6733	1.07696	0.420861	2.55894	0.0104992	0.0401322
ENSG00000232721	14.164	3.73905	1.01936	3.66803	0.000244429	0.00159969
ENSG00000232756	3.90974	5.436	2.02155	2.68902	0.00716623	0.0294869
ENSG00000232788	16.2844	5.00471	1.22563	4.08338	4.43847e-05	0.000345032
ENSG00000232878	3.81648	5.41727	2.04128	2.65385	0.00795783	0.0318248
ENSG00000232973	43.9464	2.05816	0.478981	4.29695	1.73165e-05	0.000146615
ENSG00000233029	26.1805	2.41246	0.629703	3.83111	0.000127569	0.000896686
ENSG00000233230	69.3599	1.22923	0.362145	3.39431	0.000688028	0.0040146
ENSG00000233296	205.92	1.51854	0.215711	7.03971	1.92634e-12	3.90345e-11
ENSG00000233429	121.65	1.24864	0.279054	4.47454	7.6575e-06	6.88039e-05
ENSG00000233452	55.9409	1.81036	0.412839	4.38514	1.15913e-05	0.000100965
ENSG00000233527	36.4994	2.17571	0.525359	4.14138	3.45223e-05	0.000273636
ENSG00000233611	218.97	4.85454	0.325506	14.9138	2.67924e-50	3.60432e-48
ENSG00000233728	352.187	1.36509	0.167163	8.16623	3.18187e-16	9.45388e-15
ENSG00000233895	37.8465	3.02178	0.55878	5.40783	6.37931e-08	7.88138e-07
ENSG00000234129	23.1498	1.48353	0.630304	2.35368	0.0185886	0.0639833
ENSG00000234432	33.1169	5.03642	0.864816	5.82369	5.75621e-09	8.05703e-08
ENSG00000234477	8.51484	2.95426	1.16743	2.53056	0.0113881	0.0428371
ENSG00000234567	6.48617	6.17422	1.80393	3.42265	0.000620145	0.00368511
ENSG00000234610	6.54907	3.03414	1.38379	2.19263	0.0283344	0.0897471
ENSG00000234684	64.4617	2.06781	0.391634	5.27995	1.2922e-07	1.52637e-06
ENSG00000234690	5.00384	3.20816	1.55631	2.0614	0.0392652	0.115881
ENSG00000234818	441.182	1.34088	0.150453	8.9123	4.99835e-19	1.82008e-17
ENSG00000234840	19.5362	3.38627	0.814646	4.15673	3.22828e-05	0.000258851
ENSG00000234929	3.68701	5.34965	2.058	2.59945	0.00933741	0.0364099
ENSG00000234961	61.6849	1.65448	0.389016	4.25299	2.10932e-05	0.000175523
ENSG00000235072	6.82567	3.06462	1.31618	2.32842	0.0198897	0.0674552
ENSG00000235280	27.9094	1.42153	0.568493	2.50053	0.0124008	0.0455669
ENSG00000235343	2.98876	5.05669	2.1575	2.34377	0.0190899	0.0652451
ENSG00000235398	22.9628	6.53934	1.53782	4.25234	2.11547e-05	0.000175733
ENSG00000235426	10.851	3.37403	1.12796	2.99127	0.00277824	0.0134281
ENSG00000235475	3.91341	3.89803	1.97273	1.97595	0.0481602	0.135959
ENSG00000235529	16.4406	3.64616	0.923448	3.94843	7.86669e-05	0.000578124
ENSG00000235565	3.65695	5.35176	2.04965	2.61107	0.00902606	0.035424
ENSG00000235770	133.237	5.89771	0.536644	10.99	4.26971e-28	2.46169e-26
ENSG00000235772	25.9887	1.94017	0.611723	3.17165	0.00151577	0.00799455
ENSG00000235823	377.765	1.17752	0.161854	7.27518	3.45958e-13	7.7929e-12
ENSG00000235865	192.36	3.00703	0.252535	11.9074	1.08327e-32	7.08953e-31
ENSG00000235999	427.834	2.65728	0.168767	15.7453	7.39964e-56	1.19455e-53
ENSG00000236039	27.9793	8.28289	1.53294	5.40329	6.54309e-08	8.04269e-07
ENSG00000236204	65.8038	1.63116	0.376781	4.32921	1.49648e-05	0.000128281
ENSG00000236213	28.318	2.86314	0.633115	4.52232	6.11668e-06	5.58926e-05
ENSG00000236255	19.8221	2.01147	0.747772	2.68996	0.00714616	0.0294543
ENSG00000236352	4.46146	4.12364	1.91272	2.1559	0.0310916	0.0966473
ENSG00000236384	3.05196	5.08301	2.1463	2.36827	0.0178714	0.0619108
ENSG00000236432	62.0718	3.63728	0.493348	7.37266	1.67261e-13	3.93225e-12
ENSG00000236508	3.27469	5.1864	2.1042	2.46478	0.0137097	0.049772
ENSG00000236526	67.5174	1.36885	0.368323	3.71644	0.000202053	0.00135909
ENSG00000236591	16.6444	2.90777	0.829653	3.5048	0.000456953	0.00280484
ENSG00000236651	8.98611	4.14403	1.3739	3.01624	0.00255928	0.0125833
ENSG00000236714	9.189	6.67762	1.70491	3.91669	8.97728e-05	0.000651828
ENSG00000236754	7.15437	6.31777	1.77462	3.56008	0.000370747	0.00233185
ENSG00000236772	32.8007	2.10683	0.571075	3.68923	0.00022493	0.0014818
ENSG00000236883	216.198	2.86039	0.234512	12.1972	3.21578e-34	2.43344e-32
ENSG00000236924	52.0348	1.09881	0.413778	2.65555	0.00791802	0.0316917
ENSG00000236943	176.057	3.63069	0.289033	12.5615	3.43816e-36	3.08352e-34
ENSG00000237152	5.53631	3.33531	1.54614	2.15719	0.0309907	0.0964575
ENSG00000237187	159.455	7.34604	0.755019	9.72961	2.25457e-22	1.00173e-20
ENSG00000237298	184.708	1.10772	0.229619	4.82417	1.40587e-06	1.4299e-05
ENSG00000237457	3.43422	5.25997	2.08084	2.52781	0.0114776	0.0430231
ENSG00000237460	3.84655	5.41534	2.0223	2.67782	0.00741038	0.0301331
ENSG00000237773	58.1147	2.69278	0.438049	6.14723	7.88499e-10	1.23184e-08
ENSG00000237807	69.2807	8.14202	1.46263	5.56671	2.59589e-08	3.35251e-07
ENSG00000237978	170.527	1.27975	0.237471	5.38905	7.08292e-08	8.61874e-07
ENSG00000238018	37.9074	1.29986	0.48582	2.6756	0.00745946	0.0302818
ENSG00000238133	171.014	1.74378	0.243397	7.16436	7.81488e-13	1.68211e-11
ENSG00000238290	4.26253	4.02496	1.92978	2.08571	0.0370045	0.110899
ENSG00000239415	111.666	1.06488	0.282262	3.77267	0.000161507	0.00110477
ENSG00000239523	129.118	1.82318	0.281199	6.48362	8.95489e-11	1.59641e-09
ENSG00000239775	49.3674	2.74201	0.496562	5.522	3.35161e-08	4.28281e-07
ENSG00000239911	63.6359	1.0964	0.391678	2.79922	0.00512256	0.0223702
ENSG00000240032	6.65055	2.9693	1.3718	2.16453	0.0304237	0.0949367
ENSG00000240063	7.98268	4.97826	1.71619	2.90076	0.00372256	0.0171699
ENSG00000240086	38.9117	2.71577	0.53341	5.09135	3.55526e-07	3.93108e-06
ENSG00000241101	26.1873	5.72819	1.15437	4.96218	6.97072e-07	7.52869e-06
ENSG00000241111	1132.36	3.22901	0.11428	28.2552	1.22854e-175	1.98328e-172
ENSG00000241158	5.81798	6.01478	1.84206	3.26524	0.00109372	0.00595155
ENSG00000241313	133.977	1.09274	0.259404	4.2125	2.52556e-05	0.00020731
ENSG00000241359	23.6843	8.03889	1.55103	5.18295	2.18406e-07	2.48296e-06
ENSG00000241728	224.209	1.26497	0.220387	5.73978	9.47982e-09	1.28242e-07
ENSG00000241732	5.24613	5.86784	1.88035	3.12061	0.00180478	0.00920928
ENSG00000242021	5.11973	5.8372	1.89568	3.07921	0.00207553	0.0104272
ENSG00000242396	400.3	1.89457	0.166921	11.3501	7.40862e-30	4.42962e-28
ENSG00000242540	6.16711	6.096	1.8258	3.33881	0.000841392	0.0047548
ENSG00000242590	637.762	1.53375	0.130671	11.7375	8.19097e-32	5.02138e-30
ENSG00000242741	8.11841	5.02187	1.71533	2.92764	0.00341547	0.0160282
ENSG00000242861	80.6615	1.19681	0.341259	3.50704	0.000453125	0.00278488
ENSG00000243069	18.6249	1.48672	0.699365	2.12581	0.0335187	0.102937
ENSG00000243415	8.74183	2.30234	1.09233	2.10774	0.0350536	0.106169
ENSG00000243819	41.701	1.57287	0.469535	3.34983	0.000808599	0.0045963
ENSG00000243885	4.36513	4.08293	1.92793	2.11778	0.0341933	0.104347
ENSG00000244125	3.56062	5.3054	2.05981	2.57567	0.0100045	0.0385148
ENSG00000244198	7.48394	3.84098	1.40805	2.72788	0.00637435	0.026705
ENSG00000245213	89.5584	1.10474	0.319581	3.45685	0.000546536	0.00329425
ENSG00000245293	58.6759	3.24197	0.472538	6.86075	6.84995e-12	1.35405e-10
ENSG00000245311	34.7133	1.78997	0.528336	3.38795	0.000704177	0.00409895
ENSG00000245384	5.37252	5.89779	1.87443	3.14644	0.00165269	0.00857874
ENSG00000245526	32.0555	7.02484	1.50699	4.66152	3.13888e-06	3.02821e-05
ENSG00000245573	61.743	3.98793	0.507337	7.86052	3.82546e-15	1.06475e-13
ENSG00000245864	51.9827	9.17557	1.49209	6.14945	7.77497e-10	1.21858e-08
ENSG00000246731	59.202	1.06235	0.391359	2.7145	0.00663751	0.0275454
ENSG00000246763	107.101	2.12492	0.306821	6.92559	4.34155e-12	8.68849e-11
ENSG00000246985	151.466	3.97227	0.330442	12.0211	2.75399e-33	1.93298e-31
ENSG00000247081	191.42	1.69062	0.226675	7.45837	8.76026e-14	2.17569e-12
ENSG00000247095	99.6577	2.24702	0.327799	6.85487	7.13759e-12	1.40518e-10
ENSG00000247157	43.1624	3.53561	0.568121	6.22334	4.86683e-10	7.96285e-09
ENSG00000247287	28.517	1.5303	0.572178	2.67451	0.00748376	0.0303296
ENSG00000247317	50.8317	1.55371	0.425329	3.65296	0.000259231	0.00167618
ENSG00000247400	138.53	1.96655	0.268168	7.33327	2.24601e-13	5.22954e-12
ENSG00000247498	226.886	1.33183	0.203121	6.55684	5.4959e-11	1.01204e-09
ENSG00000247828	231.47	1.67777	0.204717	8.19557	2.49408e-16	7.50236e-15
ENSG00000247925	31.0404	2.52088	0.587835	4.28842	1.79949e-05	0.000152093
ENSG00000248019	18.3775	2.0097	0.723184	2.77896	0.00545327	0.0235175
ENSG00000248027	5.95796	3.48687	1.4874	2.34428	0.019064	0.0652451
ENSG00000248309	3.05196	5.08301	2.1463	2.36827	0.0178714	0.0619108
ENSG00000248429	149.097	1.92132	0.258841	7.42278	1.14686e-13	2.76329e-12
ENSG00000248476	6.62616	3.65594	1.45194	2.51796	0.0118036	0.0439036
ENSG00000248515	2.25737	4.65048	2.34399	1.984	0.0472554	0.134149
ENSG00000248599	3.46428	5.25788	2.10059	2.50305	0.0123129	0.0453817
ENSG00000248771	137.772	10.5839	1.4625	7.23682	4.59342e-13	1.0158e-11
ENSG00000248774	265.799	1.32476	0.20274	6.5343	6.3908e-11	1.1592e-09
ENSG00000249001	14.3036	2.46909	0.853203	2.89391	0.00380477	0.017499
ENSG00000249116	19.5498	2.98701	0.772844	3.86495	0.000111111	0.000794312
ENSG00000249207	165.342	4.48155	0.342758	13.075	4.57779e-39	4.52454e-37
ENSG00000249310	29.3419	2.51052	0.608081	4.12859	3.65002e-05	0.000288583
ENSG00000249346	45.7419	1.34965	0.454674	2.96839	0.00299369	0.0142983
ENSG00000249348	81.9899	1.69648	0.340215	4.98647	6.14914e-07	6.66225e-06
ENSG00000249413	6.48617	6.17422	1.80393	3.42265	0.000620145	0.00368511
ENSG00000249417	2.6065	4.85102	2.25428	2.15191	0.0314043	0.0975568
ENSG00000249464	3.11516	5.10892	2.14135	2.38584	0.0170404	0.0596722
ENSG00000249628	48.9608	9.08824	1.49551	6.07703	1.22432e-09	1.84143e-08
ENSG00000249685	2.63963	4.88434	2.24909	2.17169	0.0298789	0.093607
ENSG00000249867	2.70283	4.91414	2.2227	2.21089	0.0270434	0.0863926
ENSG00000249898	28.2077	1.4552	0.583462	2.49408	0.0126283	0.0462975
ENSG00000250116	13.2756	1.78708	0.870791	2.05225	0.0401454	0.117859
ENSG00000250132	74.1137	1.46877	0.357515	4.10828	3.98624e-05	0.000312891
ENSG00000250334	4.06928	5.49804	1.99249	2.75938	0.00579113	0.0246454
ENSG00000250451	34.3666	2.85682	0.579046	4.93366	8.0702e-07	8.58989e-06
ENSG00000250602	113.105	1.30103	0.295041	4.40966	1.03531e-05	9.08339e-05
ENSG00000250619	4.4184	5.61294	1.96246	2.86016	0.00423428	0.0190582
ENSG00000250635	27.2642	1.88295	0.610237	3.08561	0.00203135	0.0102477
ENSG00000250786	7.2507	6.34079	1.77915	3.56395	0.000365322	0.00230372
ENSG00000250874	28.621	1.31572	0.592743	2.21971	0.0264381	0.0848508
ENSG00000250893	97.6906	1.61643	0.316284	5.11071	3.20953e-07	3.57765e-06
ENSG00000250899	267.509	1.34565	0.190196	7.07508	1.49366e-12	3.10464e-11
ENSG00000250903	66.5813	1.03548	0.371824	2.78485	0.00535519	0.0231979
ENSG00000251136	235.153	1.2272	0.200329	6.12593	9.01535e-10	1.3994e-08
ENSG00000251138	30.4594	8.40553	1.52582	5.50887	3.61155e-08	4.57872e-07
ENSG00000251179	4.57793	5.66797	1.93856	2.9238	0.00345787	0.0161334
ENSG00000251364	28.6071	1.53714	0.564094	2.72497	0.00643071	0.0268482
ENSG00000251432	104.142	3.00871	0.341795	8.80267	1.33605e-18	4.68875e-17
ENSG00000251442	8.04222	6.47737	1.74863	3.70426	0.000212008	0.00141232
ENSG00000251660	122.318	1.5507	0.281066	5.51722	3.44396e-08	4.37772e-07
ENSG00000253174	181.836	1.20924	0.224921	5.37629	7.60383e-08	9.22941e-07
ENSG00000253194	24.3184	1.42219	0.618349	2.29998	0.0214491	0.0716896
ENSG00000253200	1618.62	1.09483	0.0859441	12.7389	3.59402e-37	3.34728e-35
ENSG00000253361	55.8763	1.77759	0.418636	4.24616	2.17469e-05	0.000180035
ENSG00000253549	8.74354	6.60482	1.71683	3.84709	0.000119529	0.000848796
ENSG00000253616	14.7849	5.88781	1.59235	3.69756	0.000217681	0.001443
ENSG00000253645	98.8588	1.20489	0.306595	3.9299	8.49809e-05	0.000619823
ENSG00000253704	11.7278	1.91868	0.907773	2.11362	0.0345481	0.105297
ENSG00000253948	32.4431	1.49534	0.534335	2.79851	0.00513386	0.0223994
ENSG00000254024	189.3	1.62982	0.234104	6.96193	3.35645e-12	6.77304e-11
ENSG00000254039	5.28977	3.29516	1.53393	2.14818	0.0316997	0.0981597
ENSG00000254101	12.7465	2.71681	0.967787	2.80724	0.00499674	0.0219196
ENSG00000254129	43.9368	2.68967	0.510825	5.26535	1.3992e-07	1.63285e-06
ENSG00000254230	205.42	2.85764	0.239081	11.9526	6.29152e-33	4.29153e-31
ENSG00000254363	13.3303	2.52794	0.893622	2.82887	0.00467123	0.0207358
ENSG00000254429	57.0691	1.31352	0.396925	3.30924	0.000935501	0.00521362
ENSG00000254453	147.355	2.96027	0.288947	10.245	1.24592e-24	5.85826e-23
ENSG00000254528	9.68722	2.17823	1.06109	2.05282	0.0400904	0.117814
ENSG00000254615	36.7997	6.21855	1.11454	5.57948	2.41239e-08	3.14064e-07
ENSG00000254894	215.771	2.96756	0.238141	12.4614	1.21295e-35	9.95649e-34
ENSG00000255118	13.1093	2.33557	0.904955	2.58087	0.00985519	0.0380308
ENSG00000255120	6.6698	2.5452	1.24976	2.03656	0.0416946	0.121277
ENSG00000255126	30.1761	2.04251	0.573589	3.56093	0.000369547	0.00232733
ENSG00000255177	280.393	4.2023	0.257865	16.2965	1.04461e-59	2.10793e-57
ENSG00000255310	124.802	3.81529	0.353268	10.8	3.44239e-27	1.8732e-25
ENSG00000255337	18.9717	1.7071	0.717273	2.37999	0.0173131	0.0602784
ENSG00000255438	1899.78	1.44133	0.0917934	15.7019	1.46732e-55	2.29233e-53
ENSG00000255571	824.034	1.57451	0.116728	13.4888	1.82077e-41	1.95955e-39
ENSG00000255723	49.3271	4.27253	0.600988	7.10918	1.16735e-12	2.45803e-11
ENSG00000255857	3411.04	1.3074	0.0665801	19.6365	7.54818e-86	3.04632e-83
ENSG00000255983	16.1221	3.3167	0.896501	3.69961	0.000215933	0.00143452
ENSG00000256152	285.983	1.37394	0.183167	7.501	6.33318e-14	1.59748e-12
ENSG00000256417	76.2442	1.27673	0.345302	3.69741	0.000217806	0.001443
ENSG00000256576	18.558	2.74962	0.794604	3.46037	0.000539437	0.00326154
ENSG00000256712	67.1645	1.38937	0.37589	3.69621	0.000218844	0.0014479
ENSG00000256940	50.4199	2.15393	0.444444	4.84634	1.25762e-06	1.29865e-05
ENSG00000257027	123.794	1.59574	0.275521	5.79172	6.96685e-09	9.64013e-08
ENSG00000257045	28.7079	1.5974	0.572921	2.78817	0.00530069	0.0230029
ENSG00000257084	51.2894	1.99771	0.442858	4.51094	6.45399e-06	5.86429e-05
ENSG00000257096	56.5366	1.91257	0.428072	4.46786	7.90052e-06	7.0725e-05
ENSG00000257176	30.2976	1.78928	0.56038	3.19298	0.00140814	0.00749411
ENSG00000257185	26.6228	6.75924	1.52053	4.44531	8.77648e-06	7.79899e-05
ENSG00000257191	22.5368	2.3662	0.68262	3.46634	0.000527593	0.00319791
ENSG00000257202	149.999	3.16353	0.295396	10.7095	9.18913e-27	4.89044e-25
ENSG00000257225	68.4071	6.1071	0.7934	7.69737	1.3889e-14	3.69584e-13
ENSG00000257268	5.41558	4.41785	1.83917	2.40209	0.0163018	0.0577963
ENSG00000257453	302.777	6.16843	0.387118	15.9343	3.66556e-57	6.82781e-55
ENSG00000257497	12.8958	2.32391	0.93655	2.48136	0.0130883	0.0477669
ENSG00000257556	4.45154	5.63278	1.95048	2.88789	0.0038783	0.0177194
ENSG00000257588	4.897	5.77223	1.91211	3.01878	0.00253797	0.0125039
ENSG00000257829	32.946	2.53202	0.5793	4.37083	1.23773e-05	0.000106851
ENSG00000257831	120.536	1.22192	0.28261	4.3237	1.53434e-05	0.000131287
ENSG00000257839	12.5943	4.61329	1.27706	3.61242	0.000303352	0.00194587
ENSG00000257842	154.166	10.7437	1.46005	7.35846	1.8604e-13	4.35263e-12
ENSG00000257845	5.91432	6.04336	1.83756	3.2888	0.00100615	0.00554355
ENSG00000257869	6.94581	3.07388	1.30752	2.35092	0.0187273	0.064407
ENSG00000257894	70.1788	5.554	0.675254	8.22505	1.9511e-16	5.90572e-15
ENSG00000258086	32.9378	4.42104	0.75709	5.83951	5.23537e-09	7.37061e-08
ENSG00000258168	23.3686	4.52732	0.915848	4.94331	7.6808e-07	8.21151e-06
ENSG00000258175	38.7876	8.75258	1.50861	5.80176	6.56234e-09	9.13259e-08
ENSG00000258188	4.4184	5.61294	1.96246	2.86016	0.00423428	0.0190582
ENSG00000258294	9.53276	2.75724	1.07517	2.56446	0.0103337	0.0396561
ENSG00000258414	86.2519	2.47216	0.350387	7.05553	1.71948e-12	3.52859e-11
ENSG00000258441	422.107	1.84179	0.156611	11.7603	6.25006e-32	3.88065e-30
ENSG00000258451	156.874	4.16488	0.333356	12.4938	8.071e-36	6.73928e-34
ENSG00000258498	4.83439	4.21537	1.87981	2.24245	0.0249325	0.0805737
ENSG00000258525	83.4272	3.04012	0.37913	8.01868	1.06889e-15	3.11844e-14
ENSG00000258651	66.1051	1.82287	0.405773	4.49235	7.04407e-06	6.34097e-05
ENSG00000258655	231.363	1.17962	0.201882	5.8431	5.12378e-09	7.23454e-08
ENSG00000258704	35.7286	1.72491	0.511064	3.37513	0.000737808	0.00426539
ENSG00000258738	803.083	1.21133	0.112671	10.7511	5.85621e-27	3.15129e-25
ENSG00000258745	111.692	2.02933	0.309721	6.55214	5.67195e-11	1.0405e-09
ENSG00000258777	311.151	1.48813	0.180082	8.26359	1.41354e-16	4.30551e-15
ENSG00000258842	6.00758	6.0554	1.84331	3.28507	0.00101958	0.00560522
ENSG00000258882	4.80067	5.73771	1.91695	2.99315	0.00276113	0.0133722
ENSG00000258903	11.35	6.97942	1.65766	4.2104	2.54923e-05	0.000208546
ENSG00000258940	161.507	1.57386	0.244366	6.44058	1.19015e-10	2.09596e-09
ENSG00000258983	14.0259	2.4038	0.891324	2.69689	0.00699902	0.0288971
ENSG00000259070	20.0752	2.701	0.74894	3.60643	0.000310444	0.0019861
ENSG00000259083	253.683	2.13193	0.203168	10.4934	9.26232e-26	4.62448e-24
ENSG00000259087	3.8896	3.91898	1.97736	1.98192	0.0474877	0.13465
ENSG00000259175	16.5928	4.45247	1.08593	4.10014	4.12903e-05	0.000322531
ENSG00000259306	11.0689	1.8278	0.922148	1.98211	0.0474668	0.13465
ENSG00000259327	98.9837	2.19206	0.323698	6.77191	1.27092e-11	2.44249e-10
ENSG00000259354	4.29201	5.57627	1.96617	2.8361	0.00456678	0.020328
ENSG00000259357	6530.07	1.2664	0.0556014	22.7763	7.87583e-115	6.3571e-112
ENSG00000259409	185.991	1.1445	0.235141	4.86728	1.13142e-06	1.17083e-05
ENSG00000259460	8.61408	6.57548	1.73406	3.79197	0.00014946	0.00103405
ENSG00000259485	71.6628	4.32276	0.50162	8.6176	6.83726e-18	2.268e-16
ENSG00000259514	45.3106	1.5702	0.454541	3.45447	0.000551372	0.00331714
ENSG00000259607	83.6153	3.00705	0.378201	7.95094	1.85107e-15	5.27338e-14
ENSG00000259610	9.98754	2.85764	1.0675	2.67696	0.0074294	0.0301851
ENSG00000259663	10.9678	6.92793	1.66698	4.15599	3.23889e-05	0.000259271
ENSG00000259664	2.92556	5.02983	2.17556	2.31197	0.0207791	0.0700788
ENSG00000259709	86.7375	1.90564	0.334557	5.69602	1.22639e-08	1.64072e-07
ENSG00000259723	30.4742	1.85845	0.562439	3.30426	0.000952264	0.00528878
ENSG00000259796	52.9442	6.7449	1.08989	6.18861	6.06984e-10	9.83152e-09
ENSG00000259884	340.295	1.30833	0.169276	7.72898	1.0841e-14	2.90071e-13
ENSG00000259933	124.584	1.65461	0.288581	5.7336	9.83223e-09	1.32639e-07
ENSG00000260006	34.5888	1.40208	0.511142	2.74303	0.00608756	0.0257036
ENSG00000260228	282.684	1.75621	0.188441	9.31965	1.16721e-20	4.67173e-19
ENSG00000260244	263.07	7.06189	0.538697	13.1092	2.91562e-39	2.94174e-37
ENSG00000260296	15.3698	2.20771	0.838246	2.63372	0.00844547	0.0335257
ENSG00000260329	16.0679	2.68379	0.84136	3.18982	0.00142362	0.00755987
ENSG00000260359	19.0131	7.72525	1.57378	4.90873	9.16682e-07	9.63422e-06
ENSG00000260579	30.2453	1.26964	0.562449	2.25735	0.0239864	0.0780163
ENSG00000260604	135.223	3.04351	0.29891	10.182	2.38557e-24	1.1109e-22
ENSG00000260618	398.987	1.15929	0.163095	7.10806	1.17688e-12	2.46738e-11
ENSG00000260630	36.9627	1.45647	0.515793	2.82375	0.00474651	0.020993
ENSG00000260641	7.91948	4.96798	1.71939	2.88938	0.00385999	0.0176691
ENSG00000260655	10.7963	2.18213	0.957406	2.27922	0.0226543	0.0748394
ENSG00000260659	67.8669	1.05079	0.376203	2.79315	0.00521976	0.0227116
ENSG00000260763	4.16561	5.53872	1.98335	2.7926	0.00522856	0.0227116
ENSG00000260824	342.212	1.13255	0.166847	6.78795	1.13735e-11	2.19449e-10
ENSG00000260948	19.1684	2.20667	0.723978	3.04799	0.0023038	0.0114551
ENSG00000261051	26.4432	3.13286	0.684244	4.57858	4.68151e-06	4.39391e-05
ENSG00000261105	43.1663	1.04023	0.452085	2.30097	0.0213935	0.0715529
ENSG00000261235	22.6816	1.29498	0.637083	2.03267	0.0420862	0.12227
ENSG00000261240	78.3353	1.4068	0.342077	4.11253	3.91342e-05	0.000307674
ENSG00000261270	15.8461	1.88265	0.793106	2.37377	0.0176075	0.0612154
ENSG00000261390	11.6697	5.53964	1.63185	3.3947	0.000687038	0.00401366
ENSG00000261416	42.9774	3.63325	0.587719	6.18195	6.33164e-10	1.01874e-08
ENSG00000261452	92.4439	1.07032	0.318559	3.35987	0.000779805	0.00443783
ENSG00000261469	23.1317	1.96698	0.681376	2.88678	0.00389208	0.0177656
ENSG00000261512	7.74973	3.27809	1.2789	2.56321	0.010371	0.0397678
ENSG00000261538	3.11516	5.10892	2.14135	2.38584	0.0170404	0.0596722
ENSG00000261553	1022.69	1.82877	0.105872	17.2733	7.47232e-67	1.72326e-64
ENSG00000261572	115.084	1.80935	0.291037	6.2169	5.0707e-10	8.24073e-09
ENSG00000261584	15.8384	1.48991	0.755739	1.97146	0.0486709	0.136963
ENSG00000261589	43.6872	1.21417	0.452929	2.6807	0.00734685	0.0300007
ENSG00000261597	198.701	2.54041	0.238771	10.6395	1.9514e-26	1.02724e-24
ENSG00000261602	1756.2	1.38622	0.0853356	16.2443	2.44924e-59	4.74466e-57
ENSG00000261654	42.6259	1.13136	0.457633	2.4722	0.0134283	0.0489341
ENSG00000261662	25.5373	2.15805	0.631149	3.41924	0.000627955	0.00372238
ENSG00000261685	11.2537	2.51341	0.998293	2.51771	0.0118122	0.0439036
ENSG00000261713	73.9178	6.64758	0.894249	7.4337	1.05604e-13	2.57006e-12
ENSG00000261754	38.356	4.65978	0.734865	6.341	2.28275e-10	3.87907e-09
ENSG00000261759	642.234	1.65135	0.138619	11.9129	1.01437e-32	6.72957e-31
ENSG00000261773	2.98876	5.05669	2.1575	2.34377	0.0190899	0.0652451
ENSG00000261799	134.869	1.39852	0.260992	5.35848	8.3925e-08	1.01359e-06
ENSG00000261824	352.892	1.17609	0.166992	7.04281	1.88408e-12	3.83386e-11
ENSG00000261888	110.314	2.61566	0.324535	8.05971	7.64748e-16	2.24465e-14
ENSG00000262001	64.099	1.34848	0.381175	3.53771	0.000403616	0.00251249
ENSG00000262119	9.85719	6.78034	1.68986	4.01236	6.01135e-05	0.000458472
ENSG00000262188	10.7589	2.67794	1.00586	2.66235	0.00775978	0.0312391
ENSG00000262223	16.8609	1.57819	0.774428	2.03788	0.0415621	0.121037
ENSG00000262251	188.067	2.74789	0.247728	11.0924	1.36636e-28	7.9726e-27
ENSG00000262585	21.8253	2.09684	0.674782	3.10743	0.00188724	0.00959065
ENSG00000262691	41.3558	1.34369	0.465981	2.88357	0.003932	0.0179141
ENSG00000262769	6.52982	3.62769	1.45386	2.49521	0.0125881	0.04622
ENSG00000262831	4300.51	1.02861	0.0713502	14.4163	4.08482e-47	5.07251e-45
ENSG00000263316	11.0244	3.82558	1.16454	3.28505	0.00101966	0.00560522
ENSG00000263335	87.5903	1.11207	0.321718	3.45667	0.000546888	0.00329425
ENSG00000263644	5.92849	2.8155	1.37059	2.05423	0.0399532	0.11751
ENSG00000263707	32.4652	2.89128	0.611942	4.72476	2.30383e-06	2.28637e-05
ENSG00000263874	25.1513	2.46639	0.665554	3.70577	0.000210749	0.00140586
ENSG00000264112	1195.97	1.71582	0.0971856	17.6551	9.29975e-70	2.37046e-67
ENSG00000264177	3.27469	5.1864	2.1042	2.46478	0.0137097	0.049772
ENSG00000264982	118	2.44406	0.301048	8.11851	4.71924e-16	1.39361e-14
ENSG00000265242	29.3342	1.29765	0.556086	2.33354	0.01962	0.0667273
ENSG00000265369	5.28977	3.29516	1.53393	2.14818	0.0316997	0.0981597
ENSG00000265490	63.8723	1.11408	0.378718	2.94172	0.0032639	0.0154065
ENSG00000265519	88.4784	1.2322	0.327971	3.75705	0.000171926	0.00116779
ENSG00000265750	44.8828	1.18509	0.448189	2.64418	0.00818883	0.0326139
ENSG00000265784	779.422	1.85256	0.124089	14.9293	2.12643e-50	2.94237e-48
ENSG00000265787	12.9027	1.74689	0.863298	2.02351	0.0430204	0.124387
ENSG00000265907	36.0929	1.15459	0.509001	2.26835	0.0233081	0.0765815
ENSG00000266002	64.5181	1.65935	0.390519	4.24908	2.14647e-05	0.000178003
ENSG00000266010	7.64288	4.93835	1.74697	2.8268	0.00470155	0.020839
ENSG00000266176	8.77756	2.63621	1.10311	2.3898	0.0168577	0.0592033
ENSG00000266283	76.1833	2.84692	0.391317	7.27523	3.45829e-13	7.7929e-12
ENSG00000266709	7.614	3.2244	1.27753	2.52394	0.0116049	0.0433663
ENSG00000266921	77.3187	3.2028	0.401983	7.96751	1.61899e-15	4.66714e-14
ENSG00000266930	28.6501	1.48067	0.563373	2.62822	0.00858318	0.0339333
ENSG00000266947	33.6829	4.01758	0.696961	5.76442	8.19409e-09	1.12102e-07
ENSG00000267009	2006.03	1.00663	0.0791987	12.7102	5.18826e-37	4.7409e-35
ENSG00000267020	312.598	3.22126	0.212006	15.1942	3.86321e-52	5.5028e-50
ENSG00000267026	751.893	3.79661	0.146461	25.9224	3.72534e-148	4.51046e-145
ENSG00000267058	32.4153	4.17267	0.724076	5.76275	8.27559e-09	1.12898e-07
ENSG00000267073	34.595	8.59112	1.51756	5.66113	1.50383e-08	2.00083e-07
ENSG00000267112	1292.54	3.3962	0.109775	30.9377	3.71901e-210	9.00557e-207
ENSG00000267128	21.661	1.50983	0.647205	2.33285	0.0196561	0.066803
ENSG00000267163	52.2004	1.37206	0.435052	3.15378	0.00161172	0.00843845
ENSG00000267188	49.5296	9.10292	1.49755	6.07854	1.21282e-09	1.8298e-08
ENSG00000267248	31.4405	1.20772	0.530222	2.27776	0.0227411	0.0750238
ENSG00000267254	42.0497	4.56605	0.688946	6.62759	3.4121e-11	6.35569e-10
ENSG00000267268	9.15953	5.1851	1.6831	3.08069	0.00206523	0.0103896
ENSG00000267311	6.93164	6.2715	1.78355	3.5163	0.000437607	0.00269979
ENSG00000267469	1538.27	1.03933	0.0871964	11.9195	9.37083e-33	6.30318e-31
ENSG00000267473	30.0672	3.11189	0.668152	4.65745	3.20145e-06	3.07632e-05
ENSG00000267475	31.3108	1.82586	0.559148	3.26544	0.00109293	0.00595155
ENSG00000267481	10.9465	2.18979	0.954905	2.2932	0.0218362	0.0727825
ENSG00000267581	11.9219	7.04928	1.64881	4.27537	1.90819e-05	0.000160162
ENSG00000267601	114.21	1.18117	0.299443	3.94457	7.99442e-05	0.000586621
ENSG00000267615	62.9724	1.21457	0.384542	3.15849	0.00158591	0.00833035
ENSG00000267755	144.047	1.55447	0.255521	6.08353	1.17562e-09	1.77923e-08
ENSG00000267767	23.5287	4.19352	0.853425	4.91376	8.93482e-07	9.4273e-06
ENSG00000267868	19.1418	1.52073	0.706891	2.15129	0.0314535	0.0975844
ENSG00000267874	8.08893	3.96467	1.38787	2.85666	0.00428122	0.0192159
ENSG00000267905	16.194	3.63413	0.938054	3.87411	0.000107015	0.000768951
ENSG00000268081	9.5917	3.6032	1.20106	3.00003	0.00269957	0.013135
ENSG00000268119	82.5132	6.79926	0.885828	7.6756	1.64647e-14	4.35728e-13
ENSG00000268544	8.32508	6.5307	2.87476	2.27174	0.0231023	0.0761119
ENSG00000268658	32.6389	3.34755	0.628312	5.32785	9.93828e-08	1.1855e-06
ENSG00000269107	19.8111	1.61833	0.679826	2.38051	0.0172887	0.0602369
ENSG00000269289	76.185	1.21739	0.345971	3.51876	0.000433576	0.00268175
ENSG00000269410	199.02	1.32571	0.224188	5.91339	3.35132e-09	4.78775e-08
ENSG00000269495	4.54787	5.66959	1.95622	2.89824	0.00375262	0.0172756
ENSG00000269680	49.0376	2.07334	0.468115	4.42913	9.4616e-06	8.37706e-05
ENSG00000269813	13.2535	1.67781	0.836189	2.00649	0.0448038	0.128622
ENSG00000269834	19.5311	2.96258	0.782827	3.78446	0.000154042	0.00106423
ENSG00000269843	22.7262	1.84036	0.673972	2.73062	0.00632147	0.0265524
ENSG00000269905	252.718	1.18952	0.194451	6.11734	9.51496e-10	1.46289e-08
ENSG00000269915	176.675	1.5997	0.238657	6.70293	2.04287e-11	3.87985e-10
ENSG00000269918	63.8133	3.52863	0.474001	7.44435	9.74197e-14	2.39494e-12
ENSG00000269926	11807.6	1.04717	0.0530829	19.7271	1.26185e-86	5.55558e-84
ENSG00000269968	36022.4	1.16008	0.0560142	20.7105	2.78449e-95	1.34853e-92
ENSG00000270076	2.86236	5.00227	2.20193	2.27177	0.0231004	0.0761119
ENSG00000270093	6.77577	4.73817	1.77244	2.67324	0.00751222	0.0304195
ENSG00000270127	12.9673	2.29733	0.879532	2.612	0.00900148	0.0353562
ENSG00000270133	13.4376	2.39807	0.927111	2.5866	0.00969276	0.0375285
ENSG00000270157	106.121	1.41111	0.306358	4.60609	4.10311e-06	3.87356e-05
ENSG00000270172	136.063	1.82209	0.265964	6.85088	7.33952e-12	1.43908e-10
ENSG00000270195	33.6296	1.23384	0.514162	2.3997	0.0164084	0.0580467
ENSG00000270277	18.792	1.59311	0.71241	2.23622	0.0253371	0.0815876
ENSG00000270302	3.78335	5.39447	2.02709	2.66119	0.00778658	0.0312949
ENSG00000270372	6.99483	6.28289	1.77973	3.53024	0.000415176	0.00257451
ENSG00000270408	19.7612	5.31046	1.20227	4.41701	1.00074e-05	8.81196e-05
ENSG00000270540	4.93013	5.78914	1.94146	2.98185	0.00286516	0.0137522
ENSG00000270562	20.5201	4.74814	1.02528	4.63108	3.63758e-06	3.48848e-05
ENSG00000270571	62.1596	3.80172	0.490982	7.7431	9.70233e-15	2.62505e-13
ENSG00000270574	20.1268	1.38263	0.670182	2.06306	0.0391069	0.115485
ENSG00000270751	74.1378	2.25343	0.377374	5.97135	2.35304e-09	3.41191e-08
ENSG00000270792	2.76603	4.94318	2.20531	2.24149	0.0249941	0.0806975
ENSG00000270919	22.6247	4.46446	0.924342	4.82988	1.36617e-06	1.39881e-05
ENSG00000271109	27.4818	2.08467	0.661664	3.15064	0.00162911	0.00848366
ENSG00000271133	7.54714	3.85203	1.40567	2.74036	0.00613728	0.025846
ENSG00000271335	35.6608	2.07823	0.52357	3.96935	7.20695e-05	0.000536149
ENSG00000271359	114.587	1.18571	0.282068	4.20362	2.62674e-05	0.000214164
ENSG00000271380	462.328	1.1312	0.150745	7.50409	6.18575e-14	1.56846e-12
ENSG00000271743	3.49742	5.28288	2.06783	2.5548	0.010625	0.0405491
ENSG00000271843	54.4461	1.16053	0.407559	2.84751	0.00440625	0.0196858
ENSG00000271845	4.0398	3.94038	1.95359	2.017	0.0436959	0.125889
ENSG00000271850	13.9608	4.76748	1.25552	3.79723	0.000146322	0.00101379
ENSG00000271851	25.8898	1.352	0.589686	2.29275	0.0218626	0.0728201
ENSG00000271855	22.899	1.63569	0.64926	2.51931	0.0117584	0.043782
ENSG00000271857	16.6047	3.97357	1.00084	3.97023	7.18035e-05	0.000535816
ENSG00000271927	15.0047	1.73231	0.812305	2.13259	0.0329585	0.101538
ENSG00000272005	139.484	1.50277	0.272253	5.51975	3.39474e-08	4.32651e-07
ENSG00000272048	11.9681	1.94024	0.909547	2.13319	0.0329091	0.10145
ENSG00000272068	475.384	4.60653	0.211966	21.7324	1.01473e-104	5.46039e-102
ENSG00000272070	53.6198	2.03633	0.43614	4.66898	3.02705e-06	2.94377e-05
ENSG00000272077	12.2498	2.38479	0.918428	2.5966	0.00941503	0.0366241
ENSG00000272108	32.3768	1.89765	0.544196	3.48707	0.000488352	0.00297122
ENSG00000272154	73.8663	5.39939	0.630906	8.55815	1.1469e-17	3.72782e-16
ENSG00000272216	29.7758	1.08223	0.552121	1.96013	0.0499806	0.140241
ENSG00000272256	351.295	1.00821	0.164931	6.11289	9.78452e-10	1.49957e-08
ENSG00000272264	12.857	2.1094	0.885728	2.38155	0.0172402	0.060111
ENSG00000272267	109.223	1.06157	0.287736	3.6894	0.000224782	0.0014818
ENSG00000272275	23.8327	1.97255	0.642458	3.07032	0.00213831	0.0107088
ENSG00000272293	69.7057	1.22331	0.367132	3.33208	0.000861981	0.00485981
ENSG00000272316	22.4802	1.37099	0.647346	2.11786	0.0341873	0.104347
ENSG00000272341	114.03	1.55911	0.291293	5.35236	8.68127e-08	1.04586e-06
ENSG00000272375	6.32634	2.97791	1.39709	2.13151	0.0330468	0.101745
ENSG00000272405	717.154	3.85996	0.159349	24.2234	1.26156e-129	1.22195e-126
ENSG00000272502	27.4352	4.42337	0.82777	5.34373	9.10553e-08	1.09154e-06
ENSG00000272505	9.41061	2.15049	1.03755	2.07267	0.0382035	0.114069
ENSG00000272520	129.848	1.33581	0.265717	5.02717	4.97758e-07	5.45394e-06
ENSG00000272537	3.14829	5.13691	2.1349	2.40616	0.0161211	0.0573235
ENSG00000272620	149.883	1.30632	0.247624	5.27539	1.32471e-07	1.56096e-06
ENSG00000272625	26.3908	1.6404	0.615984	2.66305	0.00774349	0.0311994
ENSG00000272675	38.5396	3.8907	0.630424	6.17156	6.76197e-10	1.07724e-08
ENSG00000272755	184.732	5.35804	0.399048	13.4271	4.19758e-41	4.41932e-39
ENSG00000272782	19.9825	1.74536	0.69715	2.50357	0.0122947	0.0453491
ENSG00000272807	21.2308	1.83915	0.665516	2.7635	0.00571858	0.0244009
ENSG00000272824	2.89243	4.9997	2.19337	2.27946	0.0226399	0.0748394
ENSG00000272825	31.9611	2.95677	0.604113	4.8944	9.86054e-07	1.03142e-05
ENSG00000272851	111.585	1.1801	0.283522	4.16228	3.15087e-05	0.000253483
ENSG00000272884	87.757	1.55464	0.33168	4.68715	2.77037e-06	2.70601e-05
ENSG00000272885	5.67204	3.41096	1.50742	2.26278	0.0236493	0.077179
ENSG00000272917	138.403	1.31967	0.257737	5.12021	3.05196e-07	3.42144e-06
ENSG00000272990	4.38834	5.6148	1.96125	2.86287	0.00419827	0.0189313
ENSG00000273017	4.2294	4.00139	1.95478	2.04698	0.0406605	0.118769
ENSG00000273018	13.472	3.67342	1.0276	3.57476	0.000350556	0.00221927
ENSG00000273027	45.8326	1.97972	0.458966	4.31344	1.60736e-05	0.000136809
ENSG00000273033	103.894	1.44357	0.30472	4.73737	2.16507e-06	2.15769e-05
ENSG00000273077	3.21149	5.16191	2.11646	2.43894	0.0147304	0.053001
ENSG00000273084	16.1507	7.48822	1.59651	4.69038	2.72702e-06	2.68065e-05
ENSG00000273131	110.311	1.15029	0.28751	4.00087	6.311e-05	0.000478464
ENSG00000273138	206.937	2.12569	0.222437	9.55638	1.21951e-21	5.18078e-20
ENSG00000273149	41299.5	1.01292	0.0550195	18.4102	1.08752e-75	3.09816e-73
ENSG00000273261	33.1807	1.18368	0.529744	2.23443	0.0254548	0.0819119
ENSG00000273311	44.6351	1.00973	0.446097	2.26348	0.0236058	0.077089
ENSG00000273356	9.27174	2.77009	1.15705	2.3941	0.0166612	0.0585715
ENSG00000273477	7.22808	3.7795	1.42909	2.64469	0.0081766	0.032592

## Sheet: LncRNA_p<=0.05 FC<=0.5
Gene ID	baseMean	log2FoldChange	lfcSE	stat	pvalue	padj
ENSG00000012171	1116.11	-2.01439	0.10313	-19.5325	5.81217e-85	2.16526e-82
ENSG00000031544	7.88723	-4.93991	1.70851	-2.89136	0.00383577	0.0175749
ENSG00000126005	339.873	-4.53893	0.247022	-18.3746	2.09774e-75	5.64409e-73
ENSG00000130600	187.408	-1.72177	0.227279	-7.57558	3.57526e-14	9.21009e-13
ENSG00000132204	9.49765	-4.16109	1.33829	-3.10927	0.00187553	0.00954118
ENSG00000170161	33.4605	-1.03762	0.513566	-2.02043	0.0433393	0.12501
ENSG00000174365	283.82	-1.2042	0.189086	-6.36852	1.90863e-10	3.28949e-09
ENSG00000175772	10.9842	-2.18201	0.949862	-2.29719	0.0216082	0.0721215
ENSG00000176734	689.966	-6.60533	0.29499	-22.3917	4.73954e-111	2.8692e-108
ENSG00000177699	50.4691	-6.63828	1.09072	-6.08617	1.15644e-09	1.75569e-08
ENSG00000177738	259.46	-1.41455	0.191182	-7.39899	1.37224e-13	3.25771e-12
ENSG00000177822	39.8872	-8.74856	1.51112	-5.78947	7.06086e-09	9.74238e-08
ENSG00000177853	1564.09	-1.31059	0.0928529	-14.1146	3.08577e-45	3.64497e-43
ENSG00000178803	16.7444	-2.00072	0.775903	-2.57856	0.00992121	0.0382247
ENSG00000178947	89.4312	-7.47109	1.06057	-7.04439	1.86282e-12	3.8066e-11
ENSG00000179082	25.0156	-3.35493	0.725773	-4.62257	3.79022e-06	3.62052e-05
ENSG00000179859	124.966	-1.25685	0.27887	-4.50693	6.57737e-06	5.95405e-05
ENSG00000180139	29.9597	-2.93261	0.626081	-4.68407	2.81235e-06	2.74049e-05
ENSG00000181798	43.4127	-1.15571	0.458491	-2.52068	0.0117129	0.0437023
ENSG00000182648	321.188	-1.62825	0.175076	-9.30026	1.40104e-20	5.51647e-19
ENSG00000185044	11.6978	-3.83118	1.15817	-3.30795	0.000939816	0.00523164
ENSG00000185168	54.652	-1.23895	0.410816	-3.01582	0.00256282	0.012588
ENSG00000186056	62.4045	-1.2014	0.402948	-2.98154	0.00286806	0.0137525
ENSG00000186526	14.6256	-7.29971	1.61085	-4.5316	5.85384e-06	5.36935e-05
ENSG00000186615	190.037	-2.11212	0.235109	-8.98356	2.62155e-19	9.61831e-18
ENSG00000188338	3.93667	-5.40459	2.00875	-2.69052	0.00713397	0.0294291
ENSG00000188693	19.4286	-1.36318	0.688921	-1.97872	0.0478479	0.135413
ENSG00000188825	111.513	-2.26433	0.304855	-7.42756	1.10616e-13	2.67857e-12
ENSG00000196421	65.9366	-1.28387	0.370475	-3.46548	0.000529286	0.00320416
ENSG00000196668	58.5448	-9.30137	1.48754	-6.25284	4.03051e-10	6.66203e-09
ENSG00000197308	116.082	-6.50899	0.694809	-9.36802	7.39058e-21	3.00778e-19
ENSG00000198221	36.7672	-1.14973	0.496397	-2.31615	0.0205502	0.069435
ENSG00000204588	34.5487	-1.31308	0.522814	-2.51157	0.0120196	0.0445651
ENSG00000204815	54.8178	-2.66043	0.474965	-5.60132	2.12722e-08	2.79822e-07
ENSG00000204860	243.009	-1.02039	0.194347	-5.25035	1.51809e-07	1.75468e-06
ENSG00000205628	9.9434	-6.74395	1.68696	-3.9977	6.39605e-05	0.000484001
ENSG00000205913	45.2994	-1.34576	0.455883	-2.95199	0.00315736	0.0149619
ENSG00000213468	96.9193	-1.67739	0.31886	-5.2606	1.43587e-07	1.6697e-06
ENSG00000213742	932.414	-1.41519	0.107931	-13.112	2.81109e-39	2.89662e-37
ENSG00000214049	24.5733	-4.50118	0.91443	-4.92238	8.54971e-07	9.06045e-06
ENSG00000214770	33.9952	-2.1816	0.553459	-3.94176	8.08873e-05	0.000592643
ENSG00000215808	2.44554	-4.71885	2.28513	-2.06502	0.0389212	0.115147
ENSG00000215841	3.21491	-5.11151	2.12107	-2.40988	0.015958	0.0568685
ENSG00000223396	83.9265	-1.44194	0.337916	-4.26714	1.97991e-05	0.000165322
ENSG00000223414	5.05232	-5.76855	1.90407	-3.02959	0.00244883	0.0120894
ENSG00000223546	103.015	-1.6408	0.30375	-5.40181	6.59724e-08	8.08872e-07
ENSG00000223729	5.30878	-5.83947	1.88067	-3.10499	0.00190289	0.00966003
ENSG00000223749	80.0326	-4.16518	0.472194	-8.82091	1.13529e-18	4.01329e-17
ENSG00000223808	89.0497	-6.14038	0.709695	-8.65214	5.05432e-18	1.69987e-16
ENSG00000223842	4.92056	-4.17646	1.84941	-2.25827	0.023929	0.0779811
ENSG00000224008	2.95846	-4.99211	2.16645	-2.30428	0.021207	0.0710274
ENSG00000224023	21.5176	-3.09452	0.749882	-4.12667	3.68053e-05	0.000289834
ENSG00000224046	71.1436	-1.45932	0.368093	-3.96453	7.354e-05	0.000543747
ENSG00000224050	9.22846	-3.45635	1.22675	-2.81748	0.00484025	0.0213297
ENSG00000224141	8.91757	-6.58794	1.71906	-3.8323	0.000126953	0.00089365
ENSG00000224189	65.3886	-3.27857	0.451062	-7.26857	3.63305e-13	8.10823e-12
ENSG00000224511	16.0762	-2.34481	0.848488	-2.76351	0.00571828	0.0244009
ENSG00000224597	261.41	-1.72781	0.203056	-8.50903	1.75398e-17	5.66301e-16
ENSG00000224614	127.902	-1.50915	0.272127	-5.54577	2.92659e-08	3.75954e-07
ENSG00000224698	2.65439	-4.83946	2.23536	-2.16496	0.0303907	0.0948951
ENSG00000224729	17.8451	-1.72108	0.736218	-2.33774	0.019401	0.0660782
ENSG00000224789	36.0421	-1.3456	0.501349	-2.68397	0.00727542	0.0297423
ENSG00000224814	7.6407	-6.36101	1.75781	-3.61871	0.000296071	0.00190421
ENSG00000224842	11.922	-2.50225	0.952702	-2.62648	0.00862733	0.0340801
ENSG00000224984	9.71075	-6.70961	1.69181	-3.96593	7.3109e-05	0.000541386
ENSG00000225062	5.22463	-4.26669	1.83333	-2.32729	0.0199496	0.067611
ENSG00000225077	18.9095	-3.54895	0.859639	-4.12841	3.65273e-05	0.000288583
ENSG00000225255	7.24681	-6.28253	1.79844	-3.49332	0.00047705	0.00290611
ENSG00000225285	9.01962	-3.41822	1.24614	-2.74304	0.0060873	0.0257036
ENSG00000225302	21.5766	-4.05083	0.877724	-4.61515	3.92807e-06	3.73013e-05
ENSG00000225361	163.666	-1.42801	0.238349	-5.99128	2.08189e-09	3.06462e-08
ENSG00000225377	190.76	-1.1011	0.218323	-5.04345	4.57203e-07	5.03235e-06
ENSG00000225411	7.91812	-2.37151	1.14172	-2.07714	0.037789	0.113132
ENSG00000225439	25.2902	-3.56842	0.746854	-4.77794	1.77102e-06	1.78317e-05
ENSG00000225465	7.26521	-6.29147	1.77012	-3.55425	0.000379058	0.00237795
ENSG00000225555	9.3024	-2.14772	1.03756	-2.06998	0.0384539	0.114652
ENSG00000225578	262.898	-1.06919	0.195144	-5.47901	4.27724e-08	5.38043e-07
ENSG00000225606	35.9335	-2.20298	0.53919	-4.08572	4.39412e-05	0.000342134
ENSG00000225768	7.00875	-6.23998	1.78282	-3.50006	0.00046515	0.00284434
ENSG00000225792	33.4268	-1.87201	0.546665	-3.42442	0.000616114	0.00367016
ENSG00000225850	70.6687	-1.08008	0.354882	-3.04349	0.00233855	0.0115922
ENSG00000225882	27.4249	-2.97619	0.67208	-4.42832	9.49685e-06	8.39293e-05
ENSG00000225886	46.4653	-8.96677	1.49788	-5.98632	2.14646e-09	3.15009e-08
ENSG00000226239	38.1904	-3.20289	0.57321	-5.58764	2.30174e-08	3.00468e-07
ENSG00000226363	8.70418	-2.29107	1.08467	-2.11223	0.0346668	0.105592
ENSG00000226419	11.2733	-6.92315	1.65907	-4.17291	3.00728e-05	0.000243143
ENSG00000226465	20.0993	-2.49377	0.725747	-3.43613	0.000590079	0.00353245
ENSG00000226659	12.3566	-3.49547	1.05523	-3.31251	0.000924629	0.00516491
ENSG00000226688	220.501	-1.58854	0.208807	-7.6077	2.79017e-14	7.26494e-13
ENSG00000226706	697.975	-1.13402	0.119874	-9.46014	3.07521e-21	1.26214e-19
ENSG00000226824	40.4503	-1.90658	0.48741	-3.91167	9.16608e-05	0.000664541
ENSG00000226965	17.0488	-4.41802	1.05824	-4.17487	2.98158e-05	0.000241468
ENSG00000227060	5.62418	-3.25908	1.54537	-2.10893	0.0349505	0.106022
ENSG00000227136	2.46935	-4.73111	2.2845	-2.07096	0.0383626	0.114473
ENSG00000227155	3.1673	-5.09262	2.12137	-2.40063	0.0163667	0.0579415
ENSG00000227218	241.286	-1.45137	0.202224	-7.17706	7.12288e-13	1.54e-11
ENSG00000227252	28.1426	-1.35583	0.58423	-2.32071	0.0203023	0.0686619
ENSG00000227253	95.2961	-1.00662	0.310566	-3.24123	0.00119014	0.00642571
ENSG00000227285	12.2974	-2.9042	0.987563	-2.94078	0.00327391	0.0154237
ENSG00000227477	23.13	-1.59298	0.630821	-2.52525	0.0115617	0.0432713
ENSG00000227811	8.63421	-2.91594	1.15632	-2.52175	0.0116773	0.0436032
ENSG00000227869	5.00471	-5.7564	1.92764	-2.98625	0.00282423	0.0136368
ENSG00000228223	264.034	-7.44559	0.613513	-12.136	6.80795e-34	5.07245e-32
ENSG00000228318	8.94679	-6.58736	1.72813	-3.81183	0.000137939	0.000959827
ENSG00000228395	141.068	-1.29627	0.261647	-4.95428	7.25993e-07	7.8133e-06
ENSG00000228544	112.018	-1.93999	0.298575	-6.4975	8.16634e-11	1.47024e-09
ENSG00000228623	48.4401	-9.02767	1.49568	-6.03584	1.58136e-09	2.37105e-08
ENSG00000228649	34.4362	-2.35396	0.559694	-4.2058	2.60159e-05	0.00021247
ENSG00000228714	2.72581	-4.87306	2.22346	-2.19166	0.028404	0.0897526
ENSG00000229047	202.58	-1.41435	0.224444	-6.30158	2.94627e-10	4.88657e-09
ENSG00000229267	23.6509	-1.7156	0.672717	-2.55026	0.0107642	0.0409514
ENSG00000229512	27.9554	-1.86279	0.583975	-3.18984	0.00142352	0.00755987
ENSG00000229525	25.1871	-1.37578	0.603803	-2.27852	0.0226953	0.074924
ENSG00000229645	70.4324	-3.54962	0.445723	-7.96375	1.66902e-15	4.78287e-14
ENSG00000229980	88.9376	-1.47178	0.326514	-4.50754	6.55836e-06	5.94796e-05
ENSG00000230002	22.8339	-3.17137	0.751279	-4.22129	2.42906e-05	0.000200067
ENSG00000230074	11.7987	-2.05018	0.91227	-2.24734	0.024618	0.0797836
ENSG00000230091	361.186	-2.25816	0.17583	-12.8428	9.43719e-38	8.96163e-36
ENSG00000230314	8.33865	-6.48799	1.72979	-3.75073	0.00017632	0.00119262
ENSG00000230393	6.84752	-6.20427	1.78565	-3.47453	0.000511754	0.0031058
ENSG00000230490	10.2713	-6.78924	1.67801	-4.046	5.21001e-05	0.000399242
ENSG00000230534	17.9768	-1.86188	0.744334	-2.5014	0.0123702	0.0455236
ENSG00000230550	161.95	-5.3943	0.431606	-12.4982	7.63613e-36	6.48803e-34
ENSG00000230555	48.6353	-1.41538	0.4319	-3.2771	0.00104879	0.00573933
ENSG00000230880	8.32051	-4.98085	1.68161	-2.96195	0.00305695	0.0145288
ENSG00000231119	19.9868	-2.39482	0.725535	-3.30076	0.000964222	0.00533683
ENSG00000231187	61.519	-1.28269	0.38835	-3.30293	0.000956798	0.00530788
ENSG00000231327	14.3913	-2.81961	0.899858	-3.13339	0.00172798	0.00889349
ENSG00000231435	5.54539	-3.40756	1.55742	-2.18796	0.0286728	0.0904052
ENSG00000231439	35.8664	-2.24045	0.531949	-4.21177	2.53374e-05	0.000207629
ENSG00000231704	6.70017	-4.69778	1.76872	-2.65604	0.00790653	0.0316719
ENSG00000231713	5.19515	-5.80384	1.89247	-3.0668	0.00216363	0.0108137
ENSG00000231806	89.9993	-2.47355	0.344645	-7.1771	7.12072e-13	1.54e-11
ENSG00000231840	13.3655	-2.69696	0.914811	-2.9481	0.00319729	0.0151216
ENSG00000231868	29.6868	-5.29453	0.980312	-5.40086	6.63217e-08	8.11101e-07
ENSG00000232093	53.582	-1.63903	0.428006	-3.82945	0.000128432	0.000899165
ENSG00000232098	376.526	-1.97486	0.165971	-11.8988	1.19998e-32	7.74866e-31
ENSG00000232160	277.996	-2.62641	0.209525	-12.535	4.80111e-36	4.22759e-34
ENSG00000232222	108.705	-2.27003	0.310059	-7.32128	2.45619e-13	5.69156e-12
ENSG00000232229	31.5954	-1.24731	0.564147	-2.21096	0.0270387	0.0863926
ENSG00000232295	90.8355	-1.1278	0.315878	-3.57035	0.000356501	0.00225102
ENSG00000232352	17.3931	-1.96906	0.74785	-2.63297	0.0084643	0.033573
ENSG00000232445	404.477	-2.76936	0.173863	-15.9284	4.024e-57	6.96008e-55
ENSG00000232487	3.1673	-5.09262	2.12137	-2.40063	0.0163667	0.0579415
ENSG00000232527	23.7231	-1.8993	0.636741	-2.98285	0.00285577	0.0137344
ENSG00000232593	38.6027	-1.05057	0.478882	-2.1938	0.02825	0.0895385
ENSG00000232611	51.9902	-1.84158	0.435227	-4.23131	2.32332e-05	0.000192011
ENSG00000232677	372.993	-5.42387	0.290613	-18.6635	9.80482e-78	2.9678e-75
ENSG00000232767	13.4681	-2.64218	0.949878	-2.7816	0.0054092	0.0233483
ENSG00000232828	163.877	-1.37327	0.238058	-5.76863	7.99202e-09	1.09911e-07
ENSG00000232860	25.5271	-1.39242	0.613486	-2.26968	0.0232272	0.0763675
ENSG00000232931	53.506	-1.06848	0.408201	-2.61754	0.00885669	0.034844
ENSG00000233006	52.6295	-1.01568	0.429326	-2.36575	0.0179937	0.0622009
ENSG00000233237	3.88906	-5.38921	2.01212	-2.67838	0.00739792	0.0301077
ENSG00000233392	2.86323	-4.95064	2.20649	-2.24367	0.0248537	0.0804589
ENSG00000233483	27.9469	-1.15473	0.568433	-2.03142	0.0422122	0.122562
ENSG00000233577	4.19313	-5.49521	1.98087	-2.77414	0.00553472	0.0237356
ENSG00000233757	14.7497	-1.71148	0.811585	-2.10881	0.0349611	0.106022
ENSG00000233806	14.7838	-3.77242	1.00559	-3.75145	0.000175818	0.00119156
ENSG00000233928	2.77342	-4.89541	2.25848	-2.16757	0.0301916	0.094456
ENSG00000234055	6.15098	-2.79873	1.35259	-2.06916	0.0385308	0.114763
ENSG00000234062	30.4593	-1.76859	0.561035	-3.15237	0.00161952	0.00846099
ENSG00000234070	40.9054	-1.3843	0.470693	-2.94098	0.00327176	0.0154237
ENSG00000234166	35.122	-1.75824	0.51749	-3.39762	0.000679744	0.00398235
ENSG00000234290	17.3565	-2.76663	0.804803	-3.43764	0.000586802	0.00351718
ENSG00000234390	42.8309	-1.00248	0.463219	-2.16415	0.0304529	0.0949667
ENSG00000234636	28.2302	-1.14701	0.573382	-2.00042	0.0454545	0.130181
ENSG00000234775	17.3038	-7.54234	1.58584	-4.75604	1.97428e-06	1.9755e-05
ENSG00000234793	83.9494	-1.61683	0.350805	-4.60891	4.04789e-06	3.83639e-05
ENSG00000234928	9.48377	-5.17881	1.65278	-3.13339	0.00172801	0.00889349
ENSG00000234996	45.7713	-1.73984	0.454384	-3.829	0.000128664	0.000899165
ENSG00000235010	6.39921	-2.79126	1.39353	-2.00302	0.0451756	0.129536
ENSG00000235027	2184.27	-1.33007	0.0858395	-15.4949	3.75655e-54	5.51302e-52
ENSG00000235029	13.5907	-1.85111	0.840962	-2.20119	0.0277229	0.0880984
ENSG00000235049	4.43145	-4.01307	1.8919	-2.12119	0.0339058	0.103862
ENSG00000235123	11919.4	-10.2513	0.236347	-43.3738	0	0
ENSG00000235237	100.237	-2.41754	0.333153	-7.25654	3.97108e-13	8.822e-12
ENSG00000235245	36.6473	-1.44289	0.503971	-2.86305	0.00419589	0.0189313
ENSG00000235257	6.43008	-4.59037	1.81429	-2.53011	0.0114026	0.0428417
ENSG00000235584	4.25914	-5.5247	2.02194	-2.73238	0.00628784	0.026434
ENSG00000235621	22.7793	-7.93806	1.55329	-5.11048	3.21345e-07	3.57765e-06
ENSG00000235910	7.52167	-6.34117	1.75863	-3.60574	0.000311259	0.00198869
ENSG00000236008	88.2375	-2.50301	0.349709	-7.15742	8.221e-13	1.75393e-11
ENSG00000236117	20.6701	-6.35163	1.52229	-4.17243	3.01374e-05	0.000243259
ENSG00000236199	24.3341	-1.43186	0.614291	-2.33091	0.0197579	0.0670551
ENSG00000236305	33.549	-2.54837	0.592064	-4.30421	1.6758e-05	0.000142385
ENSG00000236383	10.7029	-5.39115	1.6269	-3.31376	0.000920494	0.00514997
ENSG00000236449	13.2957	-7.16367	1.63138	-4.39117	1.12744e-05	9.85591e-05
ENSG00000236499	28.5309	-5.19475	0.973965	-5.33361	9.62811e-08	1.15133e-06
ENSG00000236528	41.4314	-1.5666	0.483694	-3.23883	0.00120022	0.00647289
ENSG00000236703	113.765	-2.19997	0.302292	-7.27764	3.39711e-13	7.72404e-12
ENSG00000237149	47.0146	-1.2673	0.445844	-2.84247	0.00447648	0.0199812
ENSG00000237188	71.5375	-1.03872	0.354513	-2.92998	0.0033898	0.0159386
ENSG00000237259	12.387	-1.79825	0.878882	-2.04606	0.0407502	0.118959
ENSG00000237301	5.34647	-4.36489	1.82233	-2.39522	0.0166106	0.058548
ENSG00000237438	29.5182	-2.27453	0.588531	-3.86476	0.0001112	0.000794312
ENSG00000237605	14.2485	-2.80589	0.892295	-3.14457	0.0016633	0.00862456
ENSG00000237751	8.38342	-2.47122	1.11954	-2.20734	0.02729	0.0870081
ENSG00000237753	43.5946	-1.25885	0.453651	-2.77492	0.00552152	0.0237356
ENSG00000237886	59.035	-3.09816	0.460078	-6.73399	1.65074e-11	3.14745e-10
ENSG00000237940	16.698	-2.67801	0.809955	-3.30637	0.00094512	0.00525513
ENSG00000237976	24.743	-1.24898	0.602373	-2.07343	0.0381321	0.113926
ENSG00000238113	53.4065	-1.4179	0.420366	-3.37301	0.000743509	0.00429179
ENSG00000238117	46.3703	-2.0338	0.463875	-4.38437	1.16319e-05	0.000101127
ENSG00000238123	37.0759	-3.08161	0.583617	-5.28019	1.29051e-07	1.52637e-06
ENSG00000238178	18.9253	-5.16407	1.19285	-4.32919	1.49656e-05	0.000128281
ENSG00000238258	196.082	-1.80915	0.231732	-7.80708	5.8527e-15	1.60139e-13
ENSG00000238261	10.11	-6.76495	1.68719	-4.0096	6.08224e-05	0.000462422
ENSG00000238279	3.35234	-5.17758	2.10653	-2.45787	0.0139765	0.0505058
ENSG00000238280	71.355	-1.21453	0.360719	-3.36697	0.000759992	0.0043455
ENSG00000240211	107.727	-1.51336	0.300107	-5.04273	4.58942e-07	5.04004e-06
ENSG00000240527	74.831	-1.83342	0.365734	-5.01299	5.35904e-07	5.85865e-06
ENSG00000240758	155.749	-1.39078	0.246633	-5.63908	1.70961e-08	2.26839e-07
ENSG00000240990	21.5774	-1.53954	0.651336	-2.36366	0.0180953	0.0624186
ENSG00000241202	3.88906	-5.38921	2.01212	-2.67838	0.00739792	0.0301077
ENSG00000241357	231.52	-1.24002	0.212714	-5.82954	5.55801e-09	7.80216e-08
ENSG00000241720	373.023	-8.21685	0.663139	-12.3908	2.92935e-35	2.36447e-33
ENSG00000241764	135.989	-1.39473	0.264884	-5.26544	1.39852e-07	1.63285e-06
ENSG00000242082	16.2383	-2.43981	0.802339	-3.04087	0.00235894	0.0116694
ENSG00000242539	112.839	-8.8093	1.4241	-6.18587	6.17602e-10	9.97015e-09
ENSG00000242663	11.9628	-1.83636	0.914399	-2.00827	0.0446149	0.128308
ENSG00000242798	44.5762	-1.36355	0.462794	-2.94634	0.0032156	0.0151933
ENSG00000243107	112.885	-1.05226	0.286913	-3.66751	0.000244921	0.00160075
ENSG00000243350	3.86526	-5.38145	2.01922	-2.66511	0.0076962	0.0310606
ENSG00000243479	339.105	-1.23092	0.172463	-7.13731	9.51773e-13	2.02168e-11
ENSG00000243701	61.8359	-2.05115	0.399468	-5.13471	2.82581e-07	3.18265e-06
ENSG00000243926	30.4652	-1.53318	0.550701	-2.78404	0.00536858	0.0232143
ENSG00000243967	4.24074	-5.50965	1.99441	-2.76255	0.00573521	0.0244504
ENSG00000244036	52.5858	-1.00613	0.417626	-2.40915	0.0159896	0.0569394
ENSG00000244128	2.72581	-4.87306	2.22346	-2.19166	0.028404	0.0897526
ENSG00000244158	3.91287	-5.39692	2.00857	-2.68694	0.00721094	0.0296205
ENSG00000244161	506.467	-1.76498	0.143145	-12.33	6.24675e-35	4.87952e-33
ENSG00000244265	248.165	-2.23775	0.20671	-10.8256	2.60491e-27	1.43359e-25
ENSG00000244968	52.7619	-1.46232	0.427416	-3.4213	0.000623236	0.00369894
ENSG00000245060	287.798	-3.00852	0.207371	-14.5079	1.08e-47	1.41363e-45
ENSG00000245522	26.4764	-1.63408	0.592924	-2.75597	0.00585178	0.0248816
ENSG00000246283	97.011	-1.08095	0.310535	-3.48092	0.00049969	0.00303639
ENSG00000246695	16.5925	-1.92508	0.761333	-2.52857	0.0114529	0.0429971
ENSG00000246851	38.0042	-1.10331	0.482437	-2.28696	0.0221982	0.0736341
ENSG00000247011	9.62912	-2.79673	1.09633	-2.55099	0.0107418	0.0408983
ENSG00000248008	284.703	-2.36881	0.195899	-12.092	1.16434e-33	8.54381e-32
ENSG00000248245	3.86526	-5.38145	2.01922	-2.66511	0.0076962	0.0310606
ENSG00000248319	2.42174	-4.70649	2.2942	-2.05147	0.0402211	0.117859
ENSG00000248356	27.4657	-1.29168	0.570238	-2.26516	0.0235027	0.0769275
ENSG00000248663	329.097	-1.84933	0.175757	-10.5221	6.83547e-26	3.44835e-24
ENSG00000248668	86.8115	-1.69259	0.341116	-4.96192	6.97994e-07	7.52869e-06
ENSG00000248694	9.12642	-6.62191	1.71872	-3.85282	0.000116767	0.00083162
ENSG00000248734	52.0917	-1.60402	0.425759	-3.76743	0.000164934	0.00112503
ENSG00000248936	14.4791	-1.96271	0.823188	-2.38428	0.0171126	0.0598385
ENSG00000249007	327.812	-1.0142	0.168978	-6.00194	1.94968e-09	2.88755e-08
ENSG00000249196	11.6672	-6.97419	1.65188	-4.22197	2.42179e-05	0.000199808
ENSG00000249421	39.7762	-4.93186	0.774741	-6.36582	1.94248e-10	3.33598e-09
ENSG00000249474	14.3505	-2.45089	0.856069	-2.86295	0.00419711	0.0189313
ENSG00000249550	5.95205	-3.35054	1.51028	-2.21849	0.0265217	0.0850625
ENSG00000249906	2.65439	-4.83946	2.23536	-2.16496	0.0303907	0.0948951
ENSG00000249916	27.655	-6.7749	1.49346	-4.53638	5.72288e-06	5.2893e-05
ENSG00000249955	22.085	-1.45739	0.650396	-2.24078	0.0250406	0.0807938
ENSG00000249993	3.65641	-5.29971	2.04274	-2.59441	0.00947525	0.0367992
ENSG00000250133	15.8067	-4.37083	1.09345	-3.99728	6.40746e-05	0.000484108
ENSG00000250240	181.308	-3.24449	0.274538	-11.818	3.15018e-32	1.98134e-30
ENSG00000250303	22.8469	-1.6807	0.645927	-2.602	0.00926813	0.036198
ENSG00000250404	74.1452	-1.19582	0.351639	-3.4007	0.000672138	0.00395524
ENSG00000250900	14.6939	-2.46322	0.842889	-2.92235	0.00347397	0.0161773
ENSG00000250986	40.3608	-2.52973	0.516453	-4.89828	9.66799e-07	1.01346e-05
ENSG00000251003	15.2717	-4.87918	1.23421	-3.95329	7.70842e-05	0.000568218
ENSG00000251095	4.2226	-3.93528	1.91578	-2.05414	0.0399625	0.11751
ENSG00000251129	8.08219	-6.44317	1.7375	-3.7083	0.000208652	0.00139765
ENSG00000251131	5.34647	-4.36489	1.82233	-2.39522	0.0166106	0.058548
ENSG00000251151	175.669	-2.6407	0.252593	-10.4544	1.39895e-25	6.91339e-24
ENSG00000251359	4.85736	-4.22122	1.85872	-2.27104	0.0231445	0.0761483
ENSG00000251363	5.35639	-5.85076	1.87125	-3.12666	0.00176807	0.00903245
ENSG00000251661	14.1898	-5.77857	1.5712	-3.67781	0.000235246	0.00154376
ENSG00000251680	20.3872	-5.27782	1.18694	-4.44658	8.72481e-06	7.76733e-05
ENSG00000253125	209.025	-3.70894	0.26821	-13.8285	1.71583e-43	1.97851e-41
ENSG00000253348	12.5233	-3.51377	1.04298	-3.36896	0.000754517	0.00433097
ENSG00000253406	14.2275	-4.77082	1.24457	-3.83332	0.000126425	0.000891232
ENSG00000253445	107.968	-1.57567	0.294654	-5.34752	8.91686e-08	1.07157e-06
ENSG00000253523	7.76791	-2.43959	1.16687	-2.09072	0.0365533	0.109819
ENSG00000253706	16.2304	-7.45104	1.59761	-4.66387	3.10317e-06	3.0024e-05
ENSG00000253773	8.95216	-2.62536	1.12219	-2.33949	0.0193101	0.0659046
ENSG00000253898	166.334	-10.8071	1.45864	-7.40904	1.27217e-13	3.03502e-12
ENSG00000253917	121.374	-1.13081	0.279936	-4.03954	5.35564e-05	0.000409753
ENSG00000253978	5.56523	-5.90705	1.86006	-3.17574	0.00149455	0.00790188
ENSG00000254027	52.0067	-9.12961	1.49189	-6.11949	9.38734e-10	1.45249e-08
ENSG00000254109	51.7553	-1.94209	0.435452	-4.45994	8.19816e-06	7.32541e-05
ENSG00000254154	24.3364	-8.03463	1.546	-5.19705	2.02477e-07	2.31819e-06
ENSG00000254251	3.11969	-5.07344	2.14324	-2.36718	0.0179242	0.0620051
ENSG00000254286	38.916	-1.05357	0.477414	-2.20682	0.0273267	0.0870106
ENSG00000254290	29.6729	-5.88305	1.14244	-5.14954	2.61126e-07	2.95475e-06
ENSG00000254337	63.8644	-9.42553	1.48342	-6.35394	2.09868e-10	3.57883e-09
ENSG00000254369	54.2839	-2.39476	0.444336	-5.38953	7.06436e-08	8.6178e-07
ENSG00000254416	6.22098	-6.0629	1.83673	-3.30093	0.00096366	0.00533683
ENSG00000254419	31.6903	-2.25747	0.5687	-3.96952	7.20167e-05	0.000536149
ENSG00000254428	29.4337	-1.53612	0.559955	-2.74329	0.00608276	0.0257036
ENSG00000254548	83.7761	-3.64739	0.422182	-8.63937	5.65222e-18	1.88784e-16
ENSG00000254560	10.7267	-5.39398	1.62645	-3.31641	0.000911836	0.0051252
ENSG00000254578	366.204	-1.01402	0.160267	-6.32702	2.49935e-10	4.18836e-09
ENSG00000254680	27.9639	-2.19319	0.598162	-3.66656	0.000245838	0.00160457
ENSG00000254774	58.3597	-9.29663	1.48725	-6.25087	4.08163e-10	6.72359e-09
ENSG00000254814	144.39	-2.17284	0.286781	-7.57666	3.54572e-14	9.18284e-13
ENSG00000254876	11.0168	-6.89014	1.66337	-4.14228	3.43877e-05	0.000273016
ENSG00000254910	5.64232	-4.38869	1.79887	-2.4397	0.0146995	0.0529292
ENSG00000255036	14.0651	-7.24427	1.61917	-4.47405	7.675e-06	6.88334e-05
ENSG00000255100	14.3003	-3.35374	0.958639	-3.49844	0.000467989	0.00285449
ENSG00000255121	70.4542	-2.41054	0.391327	-6.15991	7.2785e-10	1.14447e-08
ENSG00000255173	148.954	-1.10901	0.250232	-4.43192	9.33984e-06	8.2844e-05
ENSG00000255176	9.71472	-4.24989	1.35539	-3.13556	0.00171525	0.00886951
ENSG00000255242	760.362	-1.10477	0.118157	-9.35001	8.76406e-21	3.53703e-19
ENSG00000255354	54.0346	-9.18454	1.49031	-6.16282	7.14596e-10	1.13098e-08
ENSG00000255435	93.0172	-1.36251	0.328745	-4.14457	3.40446e-05	0.000271007
ENSG00000255443	48.0065	-3.10157	0.520008	-5.96445	2.45455e-09	3.54847e-08
ENSG00000255507	22.0832	-1.52257	0.659291	-2.3094	0.0209211	0.0703544
ENSG00000255509	62.0087	-2.93337	0.438641	-6.68741	2.27153e-11	4.28055e-10
ENSG00000255518	44.2819	-7.44725	1.4567	-5.11242	3.1805e-07	3.55731e-06
ENSG00000255680	64.6052	-1.03781	0.381262	-2.72204	0.00648806	0.0270178
ENSG00000255750	16.212	-3.58658	0.935531	-3.83373	0.000126213	0.000891036
ENSG00000255843	30.586	-1.58701	0.555024	-2.85936	0.00424498	0.0190886
ENSG00000256013	1445.1	-1.05564	0.0993567	-10.6248	2.28574e-26	1.1903e-24
ENSG00000256249	4.35436	-5.55311	1.9614	-2.8312	0.00463742	0.0206046
ENSG00000256357	4.19313	-5.49521	1.98087	-2.77414	0.00553472	0.0237356
ENSG00000256469	80.8476	-3.7112	0.426465	-8.70224	3.25407e-18	1.10982e-16
ENSG00000256955	6.23342	-2.9621	1.40437	-2.1092	0.0349274	0.106022
ENSG00000257002	29.4711	-1.24418	0.548921	-2.26659	0.0234155	0.076726
ENSG00000257398	3.65641	-5.29971	2.04274	-2.59441	0.00947525	0.0367992
ENSG00000257452	100.998	-5.82953	0.612058	-9.52447	1.65889e-21	6.98609e-20
ENSG00000257499	18.3852	-2.88666	0.805589	-3.58329	0.000339289	0.0021564
ENSG00000257698	56.5364	-1.26963	0.399085	-3.18134	0.00146593	0.00776751
ENSG00000258028	5.38019	-5.85635	1.86959	-3.13242	0.0017337	0.00890385
ENSG00000258034	290.187	-2.00207	0.189401	-10.5705	4.0826e-26	2.10341e-24
ENSG00000258038	18.4011	-7.62983	1.57925	-4.8313	1.35648e-06	1.39183e-05
ENSG00000258057	310.678	-1.01879	0.175054	-5.81988	5.88915e-09	8.21935e-08
ENSG00000258102	3.91287	-5.39692	2.00857	-2.68694	0.00721094	0.0296205
ENSG00000258216	5.81573	-2.84941	1.43298	-1.98845	0.0467617	0.133138
ENSG00000258334	296.146	-1.24518	0.182379	-6.82745	8.64389e-12	1.688e-10
ENSG00000258376	23.5908	-7.98986	1.54934	-5.15693	2.51035e-07	2.84721e-06
ENSG00000258520	13.8685	-2.54945	0.885589	-2.87882	0.00399162	0.0181686
ENSG00000258592	10.8502	-6.87087	1.67347	-4.10576	4.02989e-05	0.000315805
ENSG00000258603	14.4154	-4.8349	1.26871	-3.81087	0.00013848	0.000962208
ENSG00000258702	19.6737	-5.25596	1.18941	-4.41895	9.91814e-06	8.74928e-05
ENSG00000258748	18.4158	-2.38365	0.75813	-3.14412	0.00166588	0.00862871
ENSG00000258800	220.134	-1.49343	0.207555	-7.19534	6.23042e-13	1.36534e-11
ENSG00000258884	38.8138	-1.6862	0.500523	-3.36887	0.000754768	0.00433097
ENSG00000258920	59.4433	-1.58299	0.397544	-3.98191	6.83623e-05	0.0005133
ENSG00000258922	5.70266	-5.94514	1.88659	-3.15126	0.00162569	0.00847492
ENSG00000258944	24.8218	-1.71407	0.613793	-2.79259	0.00522887	0.0227116
ENSG00000259018	20.0773	-7.75597	1.56738	-4.94835	7.48443e-07	8.01926e-06
ENSG00000259114	52.6383	-1.47862	0.420774	-3.51406	0.000441316	0.0027192
ENSG00000259116	27.6683	-1.17879	0.587391	-2.00682	0.0447688	0.128597
ENSG00000259129	71.2432	-9.5838	1.47887	-6.48049	9.14281e-11	1.62193e-09
ENSG00000259146	48.032	-1.11085	0.434083	-2.55908	0.0104949	0.0401322
ENSG00000259279	447.716	-3.54964	0.186444	-19.0387	8.15825e-81	2.63403e-78
ENSG00000259362	8.23069	-4.95986	1.69963	-2.9182	0.00352059	0.0163316
ENSG00000259368	8.08786	-4.93775	1.68879	-2.92384	0.0034574	0.0161334
ENSG00000259370	78.0968	-1.41745	0.34202	-4.14434	3.40787e-05	0.000271007
ENSG00000259459	34.8698	-7.09969	1.4718	-4.82382	1.40835e-06	1.4299e-05
ENSG00000259527	98.7077	-6.02104	0.655848	-9.18054	4.28934e-20	1.66186e-18
ENSG00000259580	19.7933	-1.89365	0.697058	-2.71663	0.0065951	0.0273929
ENSG00000259583	44.8772	-1.4738	0.453166	-3.25224	0.00114499	0.00621348
ENSG00000259589	78.5466	-1.14429	0.339623	-3.36928	0.000753641	0.00433097
ENSG00000259606	13.9566	-2.40187	0.864632	-2.77791	0.00547098	0.0235729
ENSG00000259623	434.836	-1.05461	0.160187	-6.58365	4.5904e-11	8.48523e-10
ENSG00000259627	718.166	-2.19109	0.126533	-17.3163	3.54435e-67	8.58265e-65
ENSG00000259711	11.197	-1.83914	0.923051	-1.99246	0.0463204	0.132114
ENSG00000259727	9.67277	-3.58764	1.20386	-2.98012	0.00288138	0.0138027
ENSG00000259827	107.161	-3.58398	0.366186	-9.78732	1.27633e-22	5.72338e-21
ENSG00000259901	288.991	-1.26835	0.182865	-6.93601	4.03317e-12	8.10484e-11
ENSG00000259977	39.511	-4.21923	0.668166	-6.31463	2.70802e-10	4.50685e-09
ENSG00000259994	34.3954	-1.5307	0.52435	-2.91923	0.003509	0.0162935
ENSG00000260177	4.14552	-5.48076	1.9805	-2.76736	0.00565129	0.0241777
ENSG00000260193	8.1451	-2.8198	1.17661	-2.39654	0.0165507	0.0584221
ENSG00000260219	49.4687	-1.46118	0.43749	-3.33992	0.000838036	0.00474646
ENSG00000260361	12.6412	-2.32896	0.928592	-2.50805	0.0121399	0.0449422
ENSG00000260394	8.33581	-2.46282	1.12411	-2.19091	0.028458	0.0898449
ENSG00000260401	445.486	-6.01615	0.309996	-19.4072	6.70822e-84	2.32057e-81
ENSG00000260425	37.086	-1.53291	0.516538	-2.96767	0.00300071	0.0143177
ENSG00000260469	25.4574	-8.09854	1.54184	-5.25252	1.50036e-07	1.73834e-06
ENSG00000260500	10.9355	-2.3178	0.986806	-2.34879	0.0188347	0.0646008
ENSG00000260566	137.764	-1.46779	0.271124	-5.41375	6.17188e-08	7.64461e-07
ENSG00000260577	81.07	-1.1359	0.345944	-3.28349	0.00102529	0.0056298
ENSG00000260588	64.0345	-1.01297	0.372245	-2.72124	0.00650382	0.0270601
ENSG00000260592	8.03033	-3.90354	1.38705	-2.81427	0.00488882	0.0215046
ENSG00000260681	3.68022	-5.3079	2.04077	-2.60093	0.00929706	0.0362818
ENSG00000260710	9.87198	-6.73479	1.6961	-3.97076	7.16433e-05	0.000535445
ENSG00000260766	233.602	-1.55439	0.206586	-7.52417	5.30575e-14	1.35241e-12
ENSG00000260773	55.6415	-1.11581	0.406593	-2.74429	0.00606423	0.0256723
ENSG00000260803	20.4017	-3.20769	0.824483	-3.89055	0.000100017	0.000722958
ENSG00000260810	14.7209	-7.3079	1.61144	-4.535	5.76039e-06	5.30372e-05
ENSG00000260910	4.01376	-3.85259	1.95083	-1.97485	0.0482856	0.136116
ENSG00000260929	3.96615	-3.8371	1.94202	-1.97583	0.0481738	0.135959
ENSG00000260958	4.9625	-5.73725	1.91555	-2.9951	0.00274357	0.0133137
ENSG00000260976	2.42174	-4.70649	2.2942	-2.05147	0.0402211	0.117859
ENSG00000261026	9.48744	-2.18373	1.02701	-2.12629	0.033479	0.10288
ENSG00000261065	557.782	-5.66299	0.25193	-22.4784	6.74657e-112	4.66766e-109
ENSG00000261068	48.8036	-1.04438	0.42983	-2.42975	0.0151092	0.0541626
ENSG00000261116	300.041	-4.22046	0.246935	-17.0914	1.72073e-65	3.78794e-63
ENSG00000261136	60.9753	-1.73486	0.393977	-4.40344	1.06545e-05	9.33091e-05
ENSG00000261159	17.524	-1.51163	0.762915	-1.98138	0.0475485	0.134691
ENSG00000261172	3.83153	-3.86596	1.96972	-1.96269	0.0496817	0.139564
ENSG00000261212	4.38384	-3.99798	1.90327	-2.10059	0.0356773	0.107654
ENSG00000261226	82.8052	-3.02639	0.381902	-7.92453	2.29019e-15	6.48619e-14
ENSG00000261243	44.8222	-1.28795	0.451666	-2.85155	0.00435068	0.0194915
ENSG00000261305	5.42781	-5.8675	1.87216	-3.13408	0.00172396	0.00889349
ENSG00000261318	5.15887	-3.1156	1.57884	-1.97334	0.0484563	0.136438
ENSG00000261320	2.702	-4.86193	2.22026	-2.1898	0.0285386	0.0900408
ENSG00000261350	12.759	-7.10491	1.64395	-4.32184	1.54734e-05	0.000131933
ENSG00000261353	11.4164	-5.45644	1.61365	-3.38142	0.000721113	0.0041925
ENSG00000261379	20.9206	-1.53008	0.677616	-2.25804	0.0239434	0.0779811
ENSG00000261448	48.5141	-2.23	0.46195	-4.82737	1.3835e-06	1.41356e-05
ENSG00000261600	6.51964	-6.13577	1.80669	-3.39613	0.000683455	0.00399755
ENSG00000261606	18.2259	-2.59013	0.791005	-3.27448	0.00105857	0.00577324
ENSG00000261664	62.2861	-1.11862	0.39027	-2.86627	0.0041534	0.018799
ENSG00000261690	160.757	-1.14588	0.239555	-4.78338	1.72371e-06	1.74279e-05
ENSG00000261693	12.5958	-1.83018	0.867654	-2.10934	0.0349149	0.106022
ENSG00000261962	85.6794	-1.1451	0.325578	-3.51713	0.000436246	0.00269482
ENSG00000261996	15.2168	-1.6717	0.801444	-2.08586	0.0369917	0.110899
ENSG00000262050	12.7066	-3.23542	1.00432	-3.22149	0.00127526	0.0068471
ENSG00000262198	6.40602	-6.1068	1.81181	-3.37055	0.000750173	0.00431996
ENSG00000262468	121.312	-1.02762	0.272239	-3.7747	0.000160199	0.00109915
ENSG00000262528	28.954	-1.38365	0.569322	-2.43036	0.015084	0.0541125
ENSG00000262619	24.4078	-8.03832	1.54537	-5.20157	1.97616e-07	2.2679e-06
ENSG00000262624	75.8593	-1.3473	0.351363	-3.83449	0.000125825	0.000889592
ENSG00000262703	21.1863	-1.52125	0.664133	-2.29058	0.0219879	0.0731369
ENSG00000262732	177.122	-1.13102	0.231774	-4.87984	1.06175e-06	1.10344e-05
ENSG00000262772	86.2189	-1.56494	0.333813	-4.68807	2.75795e-06	2.7038e-05
ENSG00000262967	430.826	-1.26532	0.152815	-8.2801	1.23074e-16	3.79649e-15
ENSG00000262973	6.38222	-6.10208	1.81007	-3.37118	0.000748462	0.00431524
ENSG00000263214	119.075	-1.00172	0.274006	-3.65584	0.000256337	0.0016619
ENSG00000263412	34.3917	-1.15752	0.510536	-2.26726	0.0233742	0.0766947
ENSG00000263753	7.11786	-4.78878	1.73269	-2.76378	0.00571367	0.0244009
ENSG00000263847	9.32902	-2.19966	1.07381	-2.04847	0.0405142	0.118484
ENSG00000263990	14.824	-1.54777	0.786026	-1.96911	0.0489408	0.137642
ENSG00000264269	6.72142	-3.54739	1.46533	-2.42089	0.0154828	0.0552973
ENSG00000264299	87.2956	-3.58485	0.403473	-8.88499	6.39292e-19	2.31051e-17
ENSG00000264456	16.6203	-1.6955	0.756127	-2.24234	0.0249391	0.0805737
ENSG00000264589	45.7514	-1.65777	0.452637	-3.66246	0.000249801	0.00162825
ENSG00000264672	27.6077	-1.70227	0.583855	-2.91557	0.00355042	0.0164542
ENSG00000265246	15.7827	-3.05966	0.891012	-3.43391	0.000594933	0.00355711
ENSG00000265664	153.817	-2.24728	0.264861	-8.48473	2.1622e-17	6.88918e-16
ENSG00000266680	65.4369	-1.08589	0.385548	-2.81649	0.00485522	0.0213762
ENSG00000266729	2.60678	-4.81633	2.28719	-2.10578	0.0352231	0.106616
ENSG00000266896	23.4712	-1.83257	0.649631	-2.82094	0.00478837	0.0211588
ENSG00000266904	31.4712	-1.20549	0.549969	-2.19193	0.0283844	0.0897526
ENSG00000266933	84.7701	-1.22655	0.326436	-3.75739	0.000171692	0.00116779
ENSG00000266934	40.1057	-1.38478	0.494373	-2.80109	0.00509306	0.0222614
ENSG00000266970	9.97258	-2.8094	1.06182	-2.64583	0.00814917	0.0325094
ENSG00000267034	45.3289	-7.49102	1.45872	-5.13534	2.81629e-07	3.17933e-06
ENSG00000267136	10.6859	-3.25916	1.10442	-2.951	0.00316748	0.0149952
ENSG00000267160	22.9226	-1.44562	0.665753	-2.1714	0.0299009	0.093607
ENSG00000267221	33.6073	-1.91593	0.535246	-3.57952	0.00034422	0.00218487
ENSG00000267259	20.7939	-2.34086	0.714789	-3.27489	0.00105703	0.00577136
ENSG00000267277	47.2457	-1.36376	0.443552	-3.07462	0.00210768	0.0105777
ENSG00000267288	182.998	-1.5278	0.229856	-6.64678	2.99573e-11	5.60167e-10
ENSG00000267309	41.4437	-1.04686	0.469745	-2.22857	0.0258424	0.0829937
ENSG00000267387	41.8191	-4.30509	0.664014	-6.48343	8.96602e-11	1.59641e-09
ENSG00000267432	2.49315	-4.74334	2.29321	-2.06843	0.0386	0.114836
ENSG00000267577	73.4728	-1.46979	0.361059	-4.07078	4.68565e-05	0.000362502
ENSG00000267607	9.66455	-3.53636	1.21593	-2.90835	0.00363338	0.0168065
ENSG00000267660	10.4169	-2.51386	1.0203	-2.46385	0.0137454	0.0498645
ENSG00000267666	6.82768	-3.72174	1.47433	-2.52436	0.011591	0.0433478
ENSG00000267698	28.9684	-1.11013	0.557145	-1.99253	0.0463129	0.132114
ENSG00000267701	2.91084	-4.97159	2.17301	-2.28788	0.0221443	0.0735058
ENSG00000267827	61.0806	-1.20072	0.383798	-3.12851	0.00175697	0.00898523
ENSG00000267858	359.931	-1.59533	0.168106	-9.49001	2.31017e-21	9.56253e-20
ENSG00000267992	56.9502	-1.14516	0.401067	-2.85529	0.00429974	0.0192812
ENSG00000268049	37.8491	-1.25628	0.509112	-2.46759	0.0136027	0.0494952
ENSG00000268093	52.619	-1.08974	0.413959	-2.63249	0.00847619	0.0335769
ENSG00000268186	7.63644	-3.82306	1.40395	-2.72307	0.00646791	0.0269803
ENSG00000268230	146.431	-1.57636	0.263432	-5.98392	2.17837e-09	3.18726e-08
ENSG00000268416	2.79722	-4.90683	2.30514	-2.12865	0.0332832	0.102408
ENSG00000268460	11.2158	-5.4593	1.61733	-3.37551	0.000736793	0.00426539
ENSG00000268525	197.259	-1.17516	0.219022	-5.36548	8.07349e-08	9.77498e-07
ENSG00000268549	4.58702	-5.62856	1.94019	-2.90103	0.00371939	0.0171699
ENSG00000268584	21.7036	-1.6123	0.676746	-2.38243	0.0171986	0.0600092
ENSG00000268670	9.86037	-1.95291	0.984145	-1.98437	0.0472146	0.134149
ENSG00000268895	200.965	-1.38572	0.215515	-6.42982	1.27758e-10	2.22566e-09
ENSG00000269640	113.727	-6.82492	0.76928	-8.87183	7.19533e-19	2.58126e-17
ENSG00000269656	29.2167	-1.11751	0.561177	-1.99137	0.0464407	0.132379
ENSG00000269720	3.70402	-5.31608	2.0428	-2.60235	0.00925865	0.0361902
ENSG00000269728	174.96	-6.10856	0.510204	-11.9728	4.93402e-33	3.41364e-31
ENSG00000269887	10.1285	-2.42446	1.05895	-2.28949	0.0220511	0.0732968
ENSG00000269896	43.7482	-1.38577	0.4591	-3.01845	0.00254074	0.0125049
ENSG00000269906	31.0135	-1.11776	0.553606	-2.01906	0.0434814	0.125346
ENSG00000269954	45.4395	-8.93476	1.49887	-5.96099	2.50713e-09	3.6137e-08
ENSG00000269963	169.614	-1.08121	0.233807	-4.62437	3.75743e-06	3.59629e-05
ENSG00000269984	531.95	-1.20316	0.14334	-8.39372	4.70979e-17	1.49082e-15
ENSG00000269988	167.002	-1.39409	0.242729	-5.74339	9.27984e-09	1.25889e-07
ENSG00000270010	15.2542	-1.89659	0.795166	-2.38515	0.0170722	0.0597405
ENSG00000270134	20.7514	-7.80414	1.56283	-4.9936	5.92638e-07	6.44977e-06
ENSG00000270177	27.6357	-1.85457	0.587271	-3.15795	0.0015888	0.00833648
ENSG00000270346	91.6494	-2.58936	0.347748	-7.44609	9.61443e-14	2.37565e-12
ENSG00000270362	174.651	-1.32511	0.231799	-5.7166	1.08674e-08	1.45792e-07
ENSG00000270823	670.406	-1.18382	0.122065	-9.69829	3.06596e-22	1.34986e-20
ENSG00000270953	245.045	-2.06693	0.204456	-10.1094	5.01748e-24	2.31425e-22
ENSG00000270964	50.062	-1.00164	0.435984	-2.29742	0.0215945	0.0721215
ENSG00000271308	5.07612	-5.77452	1.89658	-3.0447	0.00232916	0.0115575
ENSG00000271367	10.8137	-5.37342	1.6216	-3.31364	0.000920891	0.00514997
ENSG00000271474	4.9387	-5.73112	1.91048	-2.99983	0.00270132	0.013135
ENSG00000271533	41.9088	-1.09792	0.47233	-2.32448	0.0200997	0.0680244
ENSG00000271646	42.5543	-1.19614	0.46033	-2.59843	0.00936499	0.036488
ENSG00000271730	95.5574	-1.4219	0.311692	-4.56188	5.06972e-06	4.74907e-05
ENSG00000271738	85.9249	-1.27227	0.328116	-3.87751	0.000105531	0.000759419
ENSG00000271751	8.23321	-2.53753	1.14508	-2.21603	0.0266897	0.0854882
ENSG00000271824	2.42174	-4.70649	2.2942	-2.05147	0.0402211	0.117859
ENSG00000271880	4.0741	-5.45874	2.00505	-2.7225	0.006479	0.0270033
ENSG00000271978	11.8893	-2.15745	0.92791	-2.32506	0.0200686	0.0679666
ENSG00000272003	6.65397	-2.48075	1.25001	-1.98459	0.0471896	0.134149
ENSG00000272009	78.9401	-1.39815	0.363699	-3.84424	0.000120925	0.000857454
ENSG00000272078	332.504	-1.05247	0.182461	-5.76822	8.01126e-09	1.09911e-07
ENSG00000272142	69.2144	-1.23859	0.367817	-3.36741	0.000758783	0.0043455
ENSG00000272191	16.8504	-2.42479	0.817209	-2.96716	0.0030056	0.0143269
ENSG00000272234	5.11948	-3.19547	1.54729	-2.0652	0.0389042	0.115147
ENSG00000272382	7.78605	-2.85706	1.25804	-2.27104	0.0231448	0.0761483
ENSG00000272384	31.0977	-1.09953	0.534793	-2.056	0.0397827	0.117173
ENSG00000272418	50.587	-9.08952	1.49336	-6.08664	1.15308e-09	1.75569e-08
ENSG00000272425	2.91084	-4.97159	2.17301	-2.28788	0.0221443	0.0735058
ENSG00000272462	39.2901	-1.72869	0.493653	-3.50183	0.000462067	0.00282907
ENSG00000272468	12.0296	-1.93797	0.891294	-2.17433	0.0296801	0.093217
ENSG00000272521	148.635	-1.22018	0.252079	-4.84047	1.29534e-06	1.33192e-05
ENSG00000272525	27.929	-1.32514	0.585035	-2.26506	0.0235087	0.0769275
ENSG00000272558	3.58499	-5.27468	2.07461	-2.5425	0.0110063	0.0416761
ENSG00000272568	7.77812	-6.38922	1.74812	-3.65491	0.000257273	0.00166574
ENSG00000272622	44.5318	-2.33911	0.484891	-4.82399	1.40718e-06	1.4299e-05
ENSG00000272654	83.0546	-1.24964	0.349893	-3.5715	0.000354939	0.00224409
ENSG00000272686	163.058	-1.02895	0.235631	-4.36677	1.261e-05	0.000108666
ENSG00000272734	425.795	-8.72603	0.734181	-11.8854	1.40974e-32	8.98335e-31
ENSG00000272744	11.7258	-2.75425	0.974372	-2.8267	0.00470307	0.020839
ENSG00000272746	21.572	-1.41096	0.655854	-2.15134	0.0314495	0.0975844
ENSG00000272764	17.5146	-1.54826	0.729118	-2.12347	0.0337141	0.103405
ENSG00000272767	61.0294	-2.94709	0.43984	-6.70038	2.07883e-11	3.93272e-10
ENSG00000272780	5.79788	-5.96642	1.84653	-3.23115	0.00123291	0.00663443
ENSG00000272791	20.6066	-1.41809	0.68274	-2.07706	0.0377962	0.113132
ENSG00000272841	141.429	-3.07112	0.298948	-10.2731	9.31811e-25	4.42427e-23
ENSG00000272913	225.296	-11.2451	1.4548	-7.72963	1.07862e-14	2.90071e-13
ENSG00000272933	38.0121	-1.22782	0.489892	-2.50631	0.0122	0.0451026
ENSG00000272944	5.62418	-3.25908	1.54537	-2.10893	0.0349505	0.106022
ENSG00000272949	50.7082	-1.69378	0.43021	-3.93709	8.24756e-05	0.000603367
ENSG00000272960	22.3343	-1.42098	0.64301	-2.20989	0.0271127	0.0864997
ENSG00000272980	268.38	-1.41528	0.193933	-7.29778	2.92551e-13	6.73987e-12
ENSG00000272989	2.44554	-4.71885	2.28513	-2.06502	0.0389212	0.115147
ENSG00000273013	50.2389	-1.10016	0.430922	-2.55304	0.0106788	0.0407223
ENSG00000273055	14.7526	-1.54007	0.784648	-1.96275	0.0496753	0.139564
ENSG00000273145	35.0372	-1.04117	0.501711	-2.07523	0.037965	0.113497
ENSG00000273203	11.2747	-3.77779	1.15104	-3.28206	0.00103053	0.00565216
ENSG00000273281	46.7548	-1.37315	0.444752	-3.08746	0.00201876	0.0101949
ENSG00000273305	8.73253	-6.55657	1.71814	-3.81609	0.000135583	0.000944786
ENSG00000273320	22.0699	-1.32346	0.656598	-2.01564	0.0438377	0.126147
ENSG00000273325	3.42376	-5.20427	2.07788	-2.50461	0.0122587	0.0452508
ENSG00000273445	4.41586	-4.07582	1.90297	-2.14182	0.0322077	0.0996053
ENSG00000273473	13.8053	-2.57118	0.88924	-2.89144	0.00383484	0.0175749
