# Supplementary material for: Identification and Analysis of Estrogen Receptor α Promoting Tamoxifen Resistance-Related lncRNAs
Source: Biomed Res Int. 2020 Apr 28;2020:9031723. doi: 10.1155/2020/9031723 (PMC7204353; doi:10.1155/2020/9031723)
Supplement: Supplementary 3 — Table S3: correlation analysis between candidate lncRNAs and mRNAs. [file 9031723.f3.xlsx]

## Sheet: AC117383.1
Gene Symbol	Correlation	P-value
LOC100190986	0.445	6.93e-41
LCOR	0.424	5.41e-37
ZNF81	0.423	7.67e-37
RPL23AP64	0.422	1.39e-36
MGC16384	0.416	1.56e-35
MYSM1	0.407	5.31e-34
PHC3	0.405	1.52e-33
RASA2	0.403	3.37e-33
NKTR	0.401	7.02e-33

## Sheet: AC144450.1
Gene Symbol	Correlation	P-value
LASS6	0.571	8.56e-72
SPOPL	0.565	4.62e-70
AR	0.552	1.84e-66
RAB27B	0.543	8.85e-64
INPP4B	0.542	1.09e-63
GALNT10	0.532	6.08e-61
GSTCD	0.521	5.44e-58
UEVLD	0.518	3.14e-57
UBR1	0.503	1.18e-53
TRIM3	0.502	2.54e-53
ATP7B	0.501	4.36e-53
DTWD2	0.501	3.79e-53
ACER2	0.5	5.58e-53
KIAA1244	0.499	9.67e-53
DAAM1	0.498	2.12e-52
KIAA0232	0.497	3.12e-52
LIMA1	0.493	2.72e-51
LRBA	0.492	4.9e-51
GPR81	0.491	7.86e-51
SLC38A1	0.49	1.88e-50
FNIP1	0.488	3.54e-50
C4orf34	0.487	7.58e-50
SPTLC2	0.487	5.99e-50
CDYL2	0.486	1.32e-49
EPB41L5	0.484	3.37e-49
PBX1	0.484	4.25e-49
EXOC6	0.483	6.51e-49
C12orf51	0.482	1.2e-48
C9orf152	0.477	1.53e-47
FYCO1	0.477	1.12e-47
PLEKHF2	0.475	3.94e-47
TMEM135	0.473	7.97e-47
ARHGEF38	0.471	2.84e-46
TPO	0.47	3.28e-46
AFF1	0.469	5.75e-46
PHF20	0.468	1.35e-45
VEZF1	0.468	9.46e-46
ARID2	0.467	1.93e-45
SPG11	0.466	2.79e-45
LCOR	0.465	4.85e-45
RAPGEF6	0.464	7.95e-45
CCDC125	0.462	2.2e-44
GUSBL1	0.46	6.13e-44
KIAA1598	0.46	4.2e-44
NEK5	0.46	5.45e-44
ERGIC1	0.459	1.04e-43
SLC35A3	0.459	7.07e-44
C20orf94	0.458	1.55e-43
SHISA6	0.458	1.11e-43
MKL2	0.457	2.3e-43
TP53INP1	0.457	2.4e-43
ANKRD50	0.455	5.06e-43
ARHGAP32	0.455	4.35e-43
SLC24A1	0.455	6.73e-43
SIDT1	0.454	8.1e-43
AFF4	0.453	1.31e-42
RAB30	0.453	1.16e-42
AHNAK	0.452	2.62e-42
CYP4Z2P	0.452	2.07e-42
FRYL	0.452	2.06e-42
SERINC5	0.45	6.07e-42
CT62	0.448	1.26e-41
CHST15	0.446	3.97e-41
ZNF678	0.446	3.31e-41
IL6ST	0.445	5.65e-41
PANK3	0.445	5.66e-41
FAM179B	0.444	1.06e-40
RALGPS2	0.444	1.01e-40
SYNJ2BP	0.444	8.94e-41
ERBB3	0.442	1.87e-40
SLC26A1	0.442	1.86e-40
FRS2	0.441	3.48e-40
SLC24A2	0.441	3.28e-40
BAZ2A	0.44	4.39e-40
REST	0.44	4.71e-40
RASEF	0.439	9.15e-40
RALGAPB	0.438	1.28e-39
RREB1	0.438	1.29e-39
GREB1L	0.437	1.99e-39
RBM47	0.437	2.4e-39
BTBD12	0.436	3.73e-39
ABCC11	0.435	5.46e-39
CHD8	0.435	4.28e-39
MSI2	0.435	4.97e-39
PRLR	0.435	3.88e-39
LNX2	0.434	9.25e-39
DIP2B	0.433	9.27e-39
ALDH6A1	0.432	1.77e-38
C6orf201	0.432	2.21e-38
OTOR	0.432	1.96e-38
SP1	0.432	1.67e-38
C1orf64	0.43	4.49e-38
CHD6	0.43	4.22e-38
SEMA3C	0.43	4.41e-38
WWP1	0.43	3.56e-38
PDPK1	0.429	5.28e-38
TRIP11	0.429	5.93e-38
KIF16B	0.428	1.19e-37
RABEP1	0.428	1.2e-37
RAD50	0.428	9.37e-38
SLC39A9	0.428	8.71e-38
DPP8	0.427	1.33e-37
NEDD4	0.427	1.72e-37
ATG16L1	0.426	1.95e-37
CTNNA1	0.426	1.95e-37
ZFYVE16	0.426	2.08e-37
TTC30B	0.425	3.21e-37
WDFY3	0.425	3.78e-37
PTPLAD1	0.424	6.53e-37
TAB3	0.424	5.13e-37
HIF1AN	0.423	8.8e-37
NUDT4	0.423	9.14e-37
ABCA12	0.422	1.19e-36
ADCY6	0.421	1.93e-36
CCNT1	0.421	2.08e-36
FAM151B	0.421	1.98e-36
FAM63B	0.421	1.65e-36
TMEM184C	0.421	2.26e-36
DCAF5	0.42	3.44e-36
MARVELD2	0.42	2.44e-36
MFAP3	0.42	2.91e-36
SLC7A13	0.42	3.55e-36
ZNF91	0.42	2.62e-36
SPATA13	0.419	4.41e-36
USP40	0.419	3.98e-36
ARFIP1	0.418	7.43e-36
LNPEP	0.418	5.96e-36
SLC4A8	0.418	8.17e-36
TANC2	0.418	6.32e-36
TOM1L1	0.418	7.4e-36
KIAA0556	0.417	1.25e-35
CRNKL1	0.416	1.57e-35
KLHL28	0.416	1.51e-35
LOC153684	0.416	1.5e-35
KCNH1	0.415	2.1e-35
LOC100170939	0.415	2.75e-35
LOC148696	0.415	2.78e-35
SFRS2IP	0.415	2.3e-35
STAM2	0.415	2.46e-35
APC	0.413	4.98e-35
C5orf36	0.413	4.92e-35
NCAM2	0.413	4.88e-35
CCNG2	0.412	9.57e-35
GOLGA1	0.412	9.82e-35
GRPR	0.412	9.46e-35
PTPN13	0.412	8.12e-35
DNAH5	0.411	1.29e-34
LMBRD2	0.411	1.22e-34
NPNT	0.411	1.01e-34
PRKG1	0.411	1.45e-34
TOB1	0.411	1.09e-34
CDC42BPB	0.41	2.13e-34
EHMT1	0.41	1.89e-34
FAM161B	0.41	1.58e-34
GPR98	0.41	1.5e-34
RAB19	0.41	2.05e-34
RASA1	0.41	1.83e-34
ZNF701	0.41	2.01e-34
ABAT	0.409	2.41e-34
FITM2	0.409	2.8e-34
PARD3B	0.409	3.01e-34
SEC16A	0.409	2.27e-34
SPDEF	0.409	3.31e-34
ZBTB37	0.409	2.43e-34
FEM1C	0.408	4.76e-34
MYST4	0.408	3.84e-34
TSTD2	0.408	4.73e-34
ZBTB42	0.408	4.17e-34
ZFYVE26	0.408	4.61e-34
COL4A3BP	0.407	5.15e-34
FMN1	0.407	6.14e-34
TTC37	0.407	6.5e-34
VPS13B	0.407	5.19e-34
CORO2A	0.406	7.96e-34
ZNF619	0.406	1.09e-33
SEL1L	0.405	1.64e-33
WIPF2	0.405	1.58e-33
DOPEY2	0.404	2.2e-33
ERI2	0.404	1.79e-33
GIGYF2	0.404	1.86e-33
HPX	0.404	2.4e-33
KIAA1370	0.404	2.23e-33
KIF3B	0.404	1.78e-33
MYO5C	0.404	2.35e-33
RALGAPA1	0.404	1.98e-33
WDR31	0.404	2.25e-33
SLC2A10	0.403	2.65e-33
TAOK1	0.403	3.43e-33
APPL2	0.402	5.12e-33
ELMOD2	0.402	3.72e-33
LOC100131193	0.402	5.33e-33
MON2	0.402	4.18e-33
MICALCL	0.401	6.53e-33
COX4I1	-0.401	5.97e-33
GPR3	-0.401	7.8e-33
PRDX4	-0.401	6.49e-33
FAM19A3	-0.402	3.81e-33
MDH1	-0.404	2.42e-33
FAM100B	-0.407	5.55e-34
UTP11L	-0.407	5.07e-34
C7orf30	-0.408	4.76e-34
CXorf61	-0.408	3.97e-34
SHFM1	-0.408	4.04e-34
WDR77	-0.408	3.88e-34
ERI3	-0.411	1.07e-34
MTCP1NB	-0.414	3.59e-35
TUBA4A	-0.414	3.83e-35
ERP44	-0.415	2.15e-35
FOXC1	-0.415	1.93e-35
KLHDC3	-0.415	2.16e-35
RHEB	-0.415	2.56e-35
TOMM5	-0.415	2.77e-35
ELAC1	-0.417	1.23e-35
ATP5J2	-0.419	4.9e-36
DGUOK	-0.419	5.22e-36
SH3BGRL3	-0.42	2.46e-36
TSPAN33	-0.42	3.12e-36
LDHB	-0.422	1.31e-36
ATP5L	-0.425	4.41e-37
NDUFS5	-0.425	4.19e-37
TXNDC12	-0.426	2.91e-37
ACYP2	-0.427	1.72e-37
EIF5AL1	-0.427	1.68e-37
PSMG4	-0.427	1.55e-37
C9orf40	-0.429	6.45e-38
MIIP	-0.43	4.97e-38
C19orf43	-0.434	7.61e-39
EIF5A	-0.44	5.6e-40
CALR	-0.441	2.89e-40
BRI3	-0.442	1.94e-40
PLOD3	-0.442	2e-40
CDK2AP1	-0.444	9.36e-41
SNRPA	-0.446	4.19e-41
CEBPB	-0.449	8.49e-42
PDCD5	-0.452	2.18e-42
CSTB	-0.453	1.65e-42
YBX1	-0.456	3.61e-43
UQCRHL	-0.459	9.72e-44
MAGOH	-0.462	1.65e-44
KIAA2013	-0.468	1.3e-45
POLR2F	-0.468	9.2e-46
FAM58A	-0.478	8.16e-48
UQCRH	-0.495	1.02e-51
TMEM39B	-0.522	2.9e-58

## Sheet: RP11-15H20.6
Gene Symbol	Correlation	P-value
ZNF431	0.497	0
ZNF675	0.491	0
ZNF430	0.457	0
ZNF91	0.456	0
ZNF625	0.451	3.17e-42
SFRS14	0.45	0
ZNF791	0.448	1.76e-41
ZNF557	0.447	0
PCF11	0.443	0
ZNF709	0.443	1.11e-40
ZNF594	0.442	0
ZNF708	0.433	9.52e-39
ZNF493	0.429	0
ZBTB26	0.426	0
LRIG2	0.425	3.13e-37
ZNF558	0.423	0
ZNF397	0.418	0
ZNF681	0.416	0
CBFA2T2	0.414	0
KRBA2	0.412	0
STAG3L3	0.411	0
ZNF253	0.411	0
ZNF254	0.405	0
ANKRD26	0.4	9.44e-33
GUK1	-0.424	0

## Sheet: ATXN1-AS1
Gene Symbol	Correlation	P-value
ATXN1	0.668	1.61e-106
TTBK2	0.469	7.52e-46
ZNF192	0.456	4.08e-43
ZNF81	0.454	7.79e-43
C5orf41	0.453	1.27e-42
HERC1	0.445	6.66e-41
FAM63B	0.444	8.12e-41
ZBTB37	0.442	1.8e-40
MYSM1	0.441	3.02e-40
SRRM2	0.439	8.67e-40
RUNDC2A	0.43	3.71e-38
ZSCAN20	0.428	1.21e-37
MAPKBP1	0.425	4.32e-37
ZNF827	0.422	1.34e-36
MYO9A	0.418	7.78e-36
KIAA0664P3	0.417	1.16e-35
PRDM2	0.416	1.66e-35
ASH1L	0.415	2.42e-35
FAM168A	0.412	8.19e-35
TRIO	0.411	1.05e-34
PAR5	0.41	1.66e-34
HMBOX1	0.409	2.61e-34
NDST1	0.409	2.4e-34
MLL	0.408	3.81e-34
REL	0.408	4.14e-34
PARD3B	0.407	6.52e-34
KIAA0430	0.406	9.96e-34
KIRREL	0.403	2.58e-33
NBEAL1	0.403	2.83e-33
ZNF221	0.403	3.09e-33
KIF27	0.402	4.63e-33
PDCD2L	-0.402	5.08e-33
BOLA3	-0.403	2.76e-33
GEMIN6	-0.403	3.04e-33
C16orf61	-0.409	3.31e-34
ATP6V1F	-0.41	1.64e-34
POP7	-0.41	1.58e-34
SLC35B1	-0.41	2.2e-34
PSMG1	-0.411	1.44e-34
EIF5A	-0.412	7.28e-35
TMEM208	-0.412	6.64e-35
DDX39	-0.413	5.51e-35
PDCD5	-0.415	2.32e-35
USMG5	-0.418	6.96e-36
TALDO1	-0.421	2.17e-36
ATP5C1	-0.425	3.02e-37
C20orf24	-0.426	2.74e-37
ALG3	-0.431	2.53e-38
FAM96B	-0.436	2.88e-39
POMP	-0.436	3.41e-39
PPIA	-0.441	4e-40
NUTF2	-0.46	5.44e-44

## Sheet: ELOVL2-AS1
Gene Symbol	Correlation	P-value
ELOVL2	0.922	0
NXNL2	0.612	3.6e-85
GREB1	0.584	9.59e-76
THSD4	0.565	3.28e-70
MAPT	0.564	7.87e-70
PREX1	0.557	6.93e-68
STC2	0.552	2.41e-66
PTGER3	0.545	2.56e-64
UGCG	0.545	2.12e-64
KDM4B	0.542	1.66e-63
TMEM26	0.539	8.15e-63
LOC100130148	0.537	2.6e-62
ADCY1	0.533	4.42e-61
SYTL4	0.533	3.96e-61
CA12	0.53	3.07e-60
GPR77	0.529	5.46e-60
MYB	0.529	3.7e-60
SCUBE2	0.529	4.42e-60
WDR19	0.527	1.64e-59
SUSD3	0.52	1.08e-57
AFF3	0.519	1.63e-57
IGF1R	0.519	1.5e-57
CST9	0.515	1.6e-56
CLSTN2	0.514	2.9e-56
RBM24	0.513	5.03e-56
BCL2	0.512	9.68e-56
CT62	0.512	6.57e-56
PGR	0.512	1.06e-55
KIF12	0.508	7.91e-55
PDZK1	0.508	1.05e-54
ESR1	0.507	1.58e-54
PLIN5	0.505	3.75e-54
TBC1D9	0.503	1.18e-53
INPP4B	0.501	5.08e-53
PARD6B	0.498	1.9e-52
GFRA1	0.494	2.07e-51
CELSR2	0.493	2.84e-51
ABAT	0.492	5.66e-51
MKL2	0.492	6.43e-51
ZNF703	0.492	4.36e-51
TPSG1	0.491	7.91e-51
CELSR1	0.49	1.62e-50
NRIP1	0.49	1.13e-50
ATRIP	0.489	3.07e-50
SLC39A6	0.489	2.39e-50
WWP1	0.488	4.66e-50
NKAIN1	0.487	6.53e-50
IGDCC3	0.486	1.38e-49
DNAJC12	0.483	7.06e-49
FLJ46111	0.479	4.6e-48
WNK4	0.479	4.29e-48
IFT140	0.477	1.04e-47
ZNF92	0.477	9.85e-48
TMEM229B	0.475	3.09e-47
RERG	0.474	5.34e-47
FRS2	0.471	2.61e-46
ARSG	0.47	4.03e-46
LOC389033	0.47	4.19e-46
CCDC74B	0.468	8.94e-46
NPY1R	0.468	1.07e-45
TTC39A	0.466	3.06e-45
BHLHE40	0.465	5.28e-45
CXXC5	0.465	5.16e-45
ANKRA2	0.464	7.77e-45
GATA3	0.464	6.5e-45
LPPR3	0.464	6.88e-45
MAGED2	0.463	1.06e-44
PCP2	0.463	1.42e-44
ZNF396	0.462	2.12e-44
ZNF552	0.462	2.35e-44
ZNF442	0.46	4.5e-44
RAI2	0.459	9.11e-44
KCNK15	0.458	1.3e-43
RALGPS2	0.458	1.51e-43
IL6ST	0.457	1.84e-43
C1orf173	0.456	3.07e-43
PGLYRP2	0.456	3.12e-43
APH1B	0.455	4.84e-43
FGD3	0.455	5.16e-43
RUNDC1	0.455	6.32e-43
C6orf97	0.454	6.91e-43
KCNJ11	0.454	1.01e-42
RABEP1	0.454	7.45e-43
RLN2	0.454	9.22e-43
MAG	0.452	2.48e-42
PPM1J	0.452	2.78e-42
CCDC74A	0.451	4.04e-42
C1orf64	0.45	5.93e-42
KCNH1	0.45	5.2e-42
DNALI1	0.449	1.03e-41
GRIK4	0.449	7.84e-42
GRPR	0.449	8.22e-42
TPRG1	0.449	1.05e-41
PCSK4	0.448	1.12e-41
ADCY9	0.447	1.89e-41
CPLX1	0.447	2.01e-41
EVL	0.447	2.3e-41
TLE3	0.447	2.61e-41
ARL3	0.446	3.85e-41
CACNA1D	0.446	3.1e-41
SFXN2	0.446	3.76e-41
TPBG	0.446	4.15e-41
TTC36	0.445	4.48e-41
ACADSB	0.444	1.05e-40
AZU1	0.443	1.65e-40
SEMA3F	0.443	1.3e-40
ZNF441	0.443	1.16e-40
ANXA9	0.442	2.51e-40
IGFALS	0.442	2.1e-40
ZNF763	0.442	2.24e-40
SYTL5	0.441	3.42e-40
TRH	0.441	2.94e-40
ZMYND10	0.441	3.64e-40
BTRC	0.44	6.16e-40
CST9L	0.44	6.22e-40
FLNB	0.44	4.68e-40
LOC285593	0.44	4.49e-40
PALM	0.44	5.94e-40
CMYA5	0.438	1.54e-39
GPR139	0.438	1.24e-39
WDR93	0.438	1.22e-39
LONRF2	0.435	3.9e-39
SIAH2	0.435	3.92e-39
FAM63A	0.434	7.09e-39
PHF15	0.434	6.49e-39
RAB6C	0.434	6.02e-39
FAM161B	0.433	9.79e-39
RIMS4	0.433	1.02e-38
SLC24A1	0.433	1.15e-38
ZNF587	0.431	2.98e-38
ELP2	0.43	4.77e-38
IRS1	0.43	4.08e-38
LYPD6	0.429	6.27e-38
TCEAL1	0.429	5.93e-38
AGR3	0.428	1.24e-37
CSNK1G3	0.428	1.22e-37
MCCD1	0.428	9.49e-38
ACER2	0.427	1.61e-37
AMZ1	0.427	1.62e-37
C1orf113	0.427	1.81e-37
FRMPD2	0.427	1.57e-37
KRT37	0.427	1.69e-37
C4orf32	0.426	2.02e-37
DEGS2	0.426	1.91e-37
SEPSECS	0.426	2.21e-37
C6orf211	0.425	3.31e-37
CHAD	0.425	3.8e-37
FGFR3	0.425	3.63e-37
FSIP1	0.425	4.38e-37
MBOAT1	0.425	3.61e-37
PCBD2	0.425	3.49e-37
ACBD4	0.424	4.84e-37
CCDC30	0.424	5.92e-37
SLC22A5	0.424	5.79e-37
TIGD6	0.424	6.37e-37
ABCD3	0.423	7.1e-37
HHAT	0.423	8.35e-37
NXPH3	0.423	9.74e-37
MYOZ3	0.422	1.42e-36
ZNF497	0.422	1.13e-36
SEMA3B	0.421	2.08e-36
SLC16A6	0.421	1.98e-36
RAMP1	0.42	2.42e-36
C7orf63	0.419	5.53e-36
CCDC103	0.419	5.51e-36
GLUL	0.419	4.37e-36
HDAC11	0.418	6.7e-36
IGFBP4	0.418	5.75e-36
MLPH	0.418	6.97e-36
NAT1	0.418	6.74e-36
SPEF2	0.418	6.02e-36
EXOC6	0.417	9.82e-36
RTN4RL1	0.417	8.9e-36
LRRC50	0.416	1.35e-35
PRKAB1	0.416	1.82e-35
CACNA2D2	0.415	2.09e-35
PYY	0.415	2.15e-35
TTC8	0.414	3.42e-35
KLHDC1	0.412	6.66e-35
BCAM	0.411	9.95e-35
LRRC56	0.411	1.19e-34
TRAK1	0.411	1.03e-34
ZNF44	0.411	1.08e-34
ZNF709	0.411	1.46e-34
FAM196A	0.41	2.01e-34
GAMT	0.41	2.08e-34
RAB11FIP3	0.41	1.91e-34
ASB13	0.409	3.08e-34
NOVA1	0.409	2.75e-34
SLC7A13	0.409	2.69e-34
VAV3	0.409	3.15e-34
LMX1B	0.408	4.63e-34
MS4A8B	0.408	3.58e-34
TADA2B	0.408	4.87e-34
TUBA3E	0.408	3.87e-34
NPAS1	0.407	6.12e-34
TRIM45	0.407	6.5e-34
UBXN10	0.407	5.21e-34
ZNF776	0.407	6.31e-34
ACOT4	0.406	9.8e-34
SPTBN4	0.406	8.04e-34
ABCA3	0.405	1.33e-33
APBB2	0.405	1.53e-33
EMX1	0.405	1.29e-33
KIAA0232	0.405	1.4e-33
RGS22	0.405	1.17e-33
LOC115110	0.404	2.3e-33
MED13L	0.404	2.38e-33
TRIM66	0.404	2.39e-33
BSN	0.403	2.51e-33
DOK7	0.403	3.03e-33
LRRC48	0.403	2.8e-33
NCAM2	0.403	2.81e-33
SLC35E2	0.403	2.88e-33
AGBL2	0.402	4.53e-33
CPEB2	0.402	4.05e-33
LYPD6B	0.402	3.87e-33
SLC19A2	0.402	3.95e-33
UPF0639	0.402	4.22e-33
FOXN1	0.401	5.7e-33
XPC	0.401	7.6e-33
ZNF434	0.401	6.15e-33
DNAL1	0.4	8.11e-33
EZH1	0.4	8.85e-33
PDIA6	-0.4	8.66e-33
ERP44	-0.401	5.53e-33
PSAT1	-0.401	7.68e-33
CBX2	-0.402	5.19e-33
SOX11	-0.402	5.16e-33
CENPN	-0.403	3.6e-33
ECE2	-0.403	3.34e-33
PFKP	-0.403	2.49e-33
NRBF2	-0.404	1.8e-33
MPHOSPH6	-0.405	1.61e-33
LAD1	-0.406	8.91e-34
ODC1	-0.406	9.57e-34
UCK2	-0.406	1.05e-33
PPPDE2	-0.408	3.5e-34
CDC123	-0.411	1.08e-34
PDSS1	-0.411	1.08e-34
TMEM123	-0.411	1.05e-34
UGP2	-0.411	1.47e-34
KARS	-0.415	2e-35
SRD5A1	-0.415	2.04e-35
HMGB3	-0.418	6.52e-36
GSDMC	-0.423	1.04e-36
A2ML1	-0.426	1.98e-37
LMO4	-0.428	8.96e-38
KCMF1	-0.429	5.58e-38
GARS	-0.432	1.94e-38
PDK1	-0.432	1.91e-38
C16orf61	-0.433	1.13e-38
C9orf30	-0.433	1.39e-38
ENO1	-0.434	8.97e-39
C6orf115	-0.435	4.61e-39
FAM98A	-0.438	1.04e-39
TTLL4	-0.438	1.33e-39
TNFRSF21	-0.439	6.79e-40
PSME4	-0.443	1.14e-40
C16orf57	-0.452	2.56e-42
MEMO1	-0.457	2.1e-43
PRDX4	-0.46	6e-44
C11orf75	-0.491	1.1e-50
ACTR3	-0.492	4.33e-51

## Sheet: PCOLCE-AS1
Gene Symbol	Correlation	P-value
RBM5	0.432	1.72e-38
ADAMTS13	0.413	5.96e-35

## Sheet: ITGA9-AS1
Gene Symbol	Correlation	P-value
CTDSPL	0.696	0
C10orf79	0.501	3.3e-53
EFCAB6	0.496	5.66e-52
LZTFL1	0.489	0
LRRC48	0.478	0
C7orf63	0.476	1.54e-47
CACNA1D	0.473	0
KIF13B	0.471	0
NEK11	0.47	0
C2orf73	0.465	5.1e-45
FAM161B	0.463	0
VAMP2	0.455	0
DNAH7	0.454	7.33e-43
ZNF395	0.452	0
ZCWPW2	0.451	3.62e-42
CASC1	0.448	1.46e-41
ANUBL1	0.445	0
CYBRD1	0.444	0
NOSTRIN	0.444	0
ZBTB4	0.443	0
CYB5D1	0.442	0
LRIG1	0.441	0
PARP3	0.441	0
GARNL3	0.439	9.19e-40
C14orf45	0.438	0
ZNF619	0.438	1.05e-39
ZC3H6	0.437	0
CRY2	0.436	2.66e-39
KLHDC1	0.436	0
ULK4	0.436	3.8e-39
WDR78	0.435	5.72e-39
2020-03-08	0.433	0
GLIPR1L2	0.432	2.16e-38
FAM47E	0.431	0
TTC23L	0.431	2.74e-38
DCDC1	0.429	5.88e-38
SPATA6	0.429	7.19e-38
NISCH	0.428	0
SPATA4	0.428	1.13e-37
ALS2CR8	0.427	0
TTC18	0.427	1.49e-37
ALDH6A1	0.426	0
NME5	0.425	4.17e-37
C5	0.422	1.45e-36
RBM5	0.422	0
SPEF2	0.422	0
ZNF445	0.422	0
LOC653501	0.42	0
CALCOCO1	0.419	0
CBX7	0.419	0
PHYHD1	0.419	0
NICN1	0.418	0
GTF2IRD2	0.416	0
BBS5	0.415	0
TMEM232	0.415	2.79e-35
C15orf33	0.413	4.94e-35
C1orf101	0.413	6e-35
UBXN10	0.412	7.62e-35
ZMYND10	0.412	0
ZNF396	0.412	6.8e-35
DIXDC1	0.411	0
LOC284023	0.411	0
PTPRT	0.41	2.05e-34
CCDC30	0.409	0
HEMK1	0.408	0
KIAA1737	0.408	0
NEK10	0.408	3.67e-34
WDR19	0.407	0
ZFP14	0.407	0
EPHX2	0.405	0
KBTBD3	0.405	1.32e-33
ZNF546	0.405	0
GTF2IRD2P1	0.404	0
DNAJC27	0.403	0
ZNF491	0.403	0
VIPR1	0.401	0
DYNC2H1	0.4	0
VAC14	-0.4	0
BIRC5	-0.401	0
TMEM208	-0.401	7.12e-33
CENPA	-0.402	0
TROAP	-0.402	0
CFL1	-0.403	0
CHAC1	-0.405	0
EIF2S2	-0.405	0
PSMD14	-0.405	0
C16orf87	-0.406	9.3e-34
UBE2S	-0.406	0
ALG3	-0.408	0
CIRH1A	-0.408	0
SLC7A5	-0.409	0
CDC20	-0.412	0
C16orf80	-0.414	3.56e-35
PSMA4	-0.414	0
TBC1D7	-0.415	0
ECE2	-0.417	0
FAM54A	-0.418	6.17e-36
PSMD12	-0.418	0
SNRPA1	-0.423	0
C16orf57	-0.424	0
LRRC59	-0.424	0
LRP8	-0.426	0
COX4NB	-0.427	0
CCNB2	-0.428	0
MYBL2	-0.428	0
CENPN	-0.432	0
CCNE1	-0.433	0
KARS	-0.438	0
KPNA2	-0.438	0
RAN	-0.438	0
AURKA	-0.44	0
UBE2C	-0.44	0
CCT5	-0.441	0
DNAJB11	-0.441	0
PNP	-0.442	0
SHCBP1	-0.442	0
TMEM189	-0.442	0
C20orf24	-0.444	0
STIP1	-0.445	0
NUP93	-0.45	0
CIAPIN1	-0.451	0
NIP7	-0.452	0
PSMA7	-0.453	0
HN1	-0.457	0
ORC6L	-0.467	0
C16orf61	-0.469	0
FAM96B	-0.473	0
PSMD7	-0.484	0
TUBA1C	-0.503	0
NUTF2	-0.505	0

## Sheet: FLNB-AS1
Gene Symbol	Correlation	P-value
FLNB	0.726	1.71e-134
TRIM66	0.631	5.34e-92
RBM5	0.619	1.33e-87
LOC100190986	0.618	2.77e-87
NKTR	0.618	2.45e-87
FLJ10213	0.612	3.9e-85
SRRM2	0.607	2.11e-83
BMS1P4	0.588	3.14e-77
SETD2	0.584	8.72e-76
HEMK1	0.583	1.59e-75
MAGI1	0.583	1.35e-75
ZNF587	0.582	2.21e-75
LOC148696	0.58	1.29e-74
MED13L	0.577	1.37e-73
NISCH	0.577	8.73e-74
THSD4	0.577	1.26e-73
ZNF445	0.577	1.15e-73
ALS2CR8	0.576	2.6e-73
MKL2	0.575	4.4e-73
ZNF844	0.571	6.83e-72
IL6ST	0.568	6.24e-71
ZNF619	0.568	4.21e-71
ZNF621	0.562	3.46e-69
C3orf63	0.561	5.54e-69
C12orf51	0.559	2.96e-68
RPL23AP64	0.551	4.07e-66
ASB14	0.545	2.73e-64
TSSK4	0.545	1.64e-64
UGCG	0.543	8.74e-64
USP19	0.542	1.67e-63
ZNF785	0.542	1.29e-63
CLASP2	0.541	2.02e-63
KIAA0664P3	0.541	3.18e-63
CCDC39	0.539	9.72e-63
C15orf28	0.536	7.74e-62
WDR19	0.536	5.29e-62
BAZ2A	0.533	3.97e-61
SFRS12	0.533	4.84e-61
SLC24A1	0.533	4.49e-61
ZNF141	0.533	4.87e-61
LCOR	0.531	1.19e-60
FAM179B	0.53	2.58e-60
TNRC6A	0.53	2.26e-60
TTC14	0.53	2.32e-60
EZH1	0.528	5.92e-60
KIAA1109	0.528	6.61e-60
MGC16384	0.527	1.47e-59
KIAA1530	0.524	7.84e-59
CACNA1D	0.523	1.74e-58
APPL1	0.522	2.08e-58
MASP2	0.522	3.18e-58
DMXL1	0.521	6.17e-58
RASEF	0.52	8.06e-58
SNORD116-28	0.52	1.02e-57
QRICH1	0.519	1.95e-57
C1orf220	0.516	7.62e-57
C5orf41	0.516	7e-57
NEK4	0.516	7.67e-57
PDPK1	0.516	8.09e-57
PHF15	0.516	7.28e-57
RPL32P3	0.516	8.01e-57
LOC646471	0.515	1.84e-56
KIAA1407	0.514	3e-56
CROCCL2	0.51	2.11e-55
WDR52	0.51	3.37e-55
SLMAP	0.508	8.27e-55
ZBTB37	0.508	8.75e-55
C6orf201	0.505	4.35e-54
ZNF500	0.505	3.64e-54
LZTFL1	0.504	8.75e-54
PARD6B	0.504	7.12e-54
ZNF192	0.504	8.97e-54
ZNF717	0.504	7.48e-54
BOD1L	0.503	1.4e-53
C17orf68	0.503	1.28e-53
FNIP1	0.503	1.08e-53
SPEF2	0.503	1.23e-53
FAM161B	0.502	1.88e-53
INADL	0.502	2.45e-53
DCP1A	0.501	3.45e-53
GOLGA2B	0.501	3.87e-53
TRAK1	0.501	4.85e-53
ACVR2B	0.5	5.27e-53
KLHL11	0.499	1.4e-52
LONRF2	0.499	9.41e-53
ZNF441	0.499	1.21e-52
CELSR1	0.498	1.87e-52
VPRBP	0.497	3.26e-52
STC2	0.496	6.56e-52
IMPG1	0.495	1.17e-51
LRBA	0.495	7.87e-52
ZNF236	0.495	9.15e-52
ESR1	0.494	2.19e-51
IGF1R	0.494	1.92e-51
KDM3B	0.494	1.58e-51
KDM4B	0.494	2.26e-51
ZNF585B	0.494	1.97e-51
ADCY6	0.493	2.46e-51
TBC1D9	0.493	2.54e-51
FLJ45340	0.492	4.47e-51
GPR77	0.492	5.2e-51
AHNAK	0.491	9.88e-51
GRLF1	0.491	7.95e-51
KIAA1267	0.491	7.24e-51
MYSM1	0.491	6.89e-51
ZKSCAN1	0.491	6.8e-51
ZNF546	0.491	7.36e-51
AFF4	0.49	1.65e-50
C14orf43	0.489	2.19e-50
MYO5C	0.489	3.19e-50
TMF1	0.489	2.99e-50
ASH1L	0.488	4.24e-50
BTRC	0.487	6.46e-50
LOC100128842	0.487	5.66e-50
KIAA1737	0.486	1.36e-49
ATXN7	0.485	2.38e-49
RABEP1	0.485	2.05e-49
SPG11	0.485	2.52e-49
WDR31	0.485	1.82e-49
ACTR8	0.484	2.58e-49
AHSA2	0.484	3.19e-49
CRAMP1L	0.484	3.84e-49
MYB	0.484	2.64e-49
PHC3	0.484	3.43e-49
ZNF573	0.484	2.68e-49
ZNF740	0.484	3.81e-49
SEPSECS	0.483	5.55e-49
DNAL1	0.482	7.6e-49
MTMR15	0.482	9.18e-49
NICN1	0.482	8.99e-49
RAD50	0.482	1.18e-48
RAPGEF6	0.482	8.94e-49
SMCR8	0.482	7.94e-49
ZBTB40	0.482	1.05e-48
ZC3H6	0.482	9.45e-49
MAST4	0.481	1.78e-48
PXK	0.481	1.98e-48
AFF1	0.48	2.93e-48
ASB16	0.48	2.62e-48
C1orf111	0.48	3.01e-48
CSAD	0.48	2.63e-48
MLL2	0.48	3.05e-48
APH1B	0.479	4.62e-48
GOLGB1	0.479	4.88e-48
KIAA0430	0.479	4.12e-48
MAPT	0.479	3.83e-48
2020-03-08	0.479	5.04e-48
MST1	0.479	3.43e-48
PPIP5K1	0.479	5.54e-48
ZNF625	0.479	5.08e-48
AKAP9	0.478	5.74e-48
BMS1P5	0.478	8.03e-48
INTU	0.478	5.82e-48
LIMD1	0.478	6.79e-48
PBRM1	0.478	5.63e-48
PREX1	0.478	6.87e-48
LOC389333	0.477	9.66e-48
STH	0.477	1.03e-47
TTBK2	0.477	1.11e-47
CPEB3	0.476	2.39e-47
FAM63A	0.476	1.85e-47
KIF12	0.476	2.16e-47
RALGPS2	0.476	1.98e-47
TLE3	0.476	1.98e-47
ATG2B	0.475	2.83e-47
SLC35E2	0.475	2.75e-47
ZNF281	0.475	3.21e-47
L3MBTL	0.474	6.18e-47
VPS39	0.474	4.84e-47
FMN1	0.473	9.1e-47
IP6K1	0.473	1.04e-46
UTP14C	0.473	7.06e-47
ZNF224	0.473	7.06e-47
CPEB4	0.472	1.18e-46
ERBB4	0.472	1.28e-46
DENND4C	0.471	1.9e-46
TTC18	0.471	1.9e-46
WDR6	0.471	2.86e-46
ZBTB26	0.471	2.04e-46
ATRIP	0.47	3.84e-46
HERC1	0.47	3.15e-46
OTUD7B	0.47	3.61e-46
ZFP14	0.47	4.99e-46
CRIPAK	0.469	7.6e-46
DCAF16	0.469	8.01e-46
NRIP1	0.469	6.11e-46
SP1	0.469	7.51e-46
C10orf79	0.468	1.02e-45
CA12	0.468	9.65e-46
CREBBP	0.468	9.83e-46
FYCO1	0.468	9.7e-46
PAN2	0.468	1.3e-45
POLI	0.468	1.07e-45
ACADSB	0.467	1.82e-45
ARID4A	0.467	2.16e-45
KLHDC1	0.467	1.44e-45
TMEM161B	0.467	1.96e-45
ATE1	0.466	2.27e-45
CCDC66	0.466	2.34e-45
DNAJC16	0.466	2.83e-45
KCND3	0.466	2.34e-45
LRIG1	0.466	2.34e-45
SFMBT1	0.466	3.08e-45
C16orf3	0.465	5.15e-45
PLXNB1	0.465	3.73e-45
SMG1	0.465	5.01e-45
ZNF417	0.465	4.82e-45
AP1AR	0.464	8.78e-45
C17orf57	0.464	6.44e-45
GPATCH8	0.464	5.9e-45
OGT	0.464	6.7e-45
RREB1	0.464	6.92e-45
ABCD3	0.463	1.38e-44
FAM116A	0.463	1.08e-44
MTX3	0.463	1.31e-44
PLEKHA7	0.463	9.59e-45
SACM1L	0.463	9.95e-45
ABAT	0.462	1.93e-44
CPEB2	0.462	1.73e-44
NUDT12	0.462	2.34e-44
TSC1	0.462	1.74e-44
ARID2	0.461	3.6e-44
MLL3	0.461	2.86e-44
SPOPL	0.461	3.47e-44
SYTL4	0.461	2.64e-44
CHD1	0.46	4.77e-44
CHD2	0.46	5.56e-44
LOC619207	0.46	5.81e-44
TP53BP1	0.46	4.47e-44
ULK4	0.46	5.63e-44
AGAP5	0.459	7e-44
CHD6	0.459	6.62e-44
EFHC1	0.459	9.57e-44
TCP11L2	0.459	9.2e-44
GLUD2	0.458	1.29e-43
HIPK3	0.458	1.48e-43
TAF1L	0.458	1.4e-43
ZBTB4	0.458	1.21e-43
GIGYF2	0.457	2.08e-43
KIAA1632	0.457	2.35e-43
LENG8	0.457	2.34e-43
LOC652276	0.457	2.18e-43
MYST4	0.457	2e-43
HEATR5B	0.456	2.77e-43
IKZF5	0.456	2.92e-43
INPP4B	0.456	3.58e-43
LOC100132707	0.456	3.9e-43
MGEA5	0.456	2.72e-43
RUFY2	0.456	3.1e-43
SIN3A	0.456	3.01e-43
UBE3B	0.456	3.21e-43
FAM63B	0.455	6.46e-43
NCOA2	0.455	6.13e-43
NXNL2	0.454	1.09e-42
DNAH1	0.453	1.26e-42
RUNDC1	0.453	1.36e-42
LRRC50	0.452	2.24e-42
PCF11	0.452	2.71e-42
PPIP5K2	0.452	2.73e-42
YTHDC2	0.452	2.35e-42
C16orf52	0.451	3.32e-42
SEC31B	0.451	3.15e-42
ZMAT1	0.451	3.02e-42
DNAH7	0.45	6.21e-42
FAM13B	0.45	6.21e-42
SPATA13	0.45	5.14e-42
SYDE2	0.45	6.39e-42
TAF1	0.45	4.57e-42
WWP1	0.45	4.65e-42
ALG10B	0.449	8.49e-42
CT62	0.449	1.04e-41
FBXO38	0.449	8.87e-42
PRICKLE4	0.449	7.73e-42
WDR60	0.449	7.8e-42
AFF3	0.448	1.4e-41
ARHGEF12	0.448	1.59e-41
ENTPD5	0.448	1.72e-41
ACER2	0.447	2.38e-41
ANKRA2	0.447	2.31e-41
DDI2	0.447	1.98e-41
RALGAPA1	0.447	2.22e-41
BRWD1	0.446	4.26e-41
CELSR2	0.446	3.86e-41
GREB1	0.446	3.37e-41
KIAA1143	0.446	3.9e-41
C7orf63	0.445	5.47e-41
ZNF589	0.445	5.15e-41
AKAP10	0.444	7.03e-41
CGGBP1	0.444	8.35e-41
KIAA0556	0.444	1e-40
PRLR	0.444	8.15e-41
RAD54L2	0.444	9.51e-41
ARID1A	0.443	1.55e-40
C6orf97	0.443	1.38e-40
CALCOCO1	0.443	1.67e-40
CCDC30	0.443	1.38e-40
CMYA5	0.443	1.42e-40
IFT140	0.443	1.49e-40
ITPR1	0.443	1.12e-40
NBR1	0.443	1.51e-40
SPDYE5	0.443	1.16e-40
TRIM23	0.443	1.51e-40
BDP1	0.442	2.27e-40
KIAA0232	0.442	2.26e-40
KRBA2	0.442	1.85e-40
ZNF44	0.442	1.81e-40
ZNF763	0.442	1.96e-40
ZNF776	0.442	2.26e-40
ARSG	0.441	3.77e-40
KIAA1310	0.441	3.13e-40
ZNF493	0.441	3.73e-40
ANKRD12	0.44	6.57e-40
ARFGEF2	0.44	4.42e-40
SLC16A6	0.44	4.53e-40
TAS2R4	0.44	5.08e-40
TRIM52	0.44	4.32e-40
C12orf72	0.439	9.25e-40
CASZ1	0.439	1e-39
HERC2	0.439	6.6e-40
MAT2A	0.439	1.02e-39
ZNF552	0.439	6.7e-40
ADAMTS15	0.438	1.12e-39
DCDC1	0.438	1.33e-39
SEMA3F	0.438	1.3e-39
TTLL3	0.438	1.5e-39
ZNF665	0.438	1.5e-39
ZNF792	0.438	1.27e-39
ADCY9	0.437	2.23e-39
C3orf18	0.436	3.15e-39
HIF1AN	0.436	3.37e-39
LOC100170939	0.436	3.41e-39
PGR	0.436	2.56e-39
ZNF81	0.436	3.13e-39
AGAP11	0.435	4.12e-39
ALDH6A1	0.435	4.1e-39
EPB41L5	0.435	4.33e-39
PAN3	0.435	4.54e-39
POLN	0.435	4.79e-39
PRKAR2A	0.435	4.55e-39
ZNF780B	0.435	4.92e-39
C9orf129	0.434	6.83e-39
ELOVL2	0.434	8.21e-39
NEK5	0.434	8.2e-39
RPS15AP10	0.434	6.93e-39
BRD8	0.433	1.38e-38
CEP120	0.433	1.24e-38
DNAJB14	0.433	1.17e-38
MYO15B	0.433	1.19e-38
NARG2	0.433	1.01e-38
NR2C2	0.433	1.12e-38
REL	0.433	1.06e-38
ZSCAN29	0.433	1.16e-38
ATRX	0.432	2.18e-38
GON4L	0.432	1.69e-38
KIAA1467	0.432	2.01e-38
PAPD4	0.432	1.71e-38
RBM6	0.432	1.59e-38
SNORA39	0.432	1.52e-38
SUGT1L1	0.432	2.05e-38
TPCN1	0.432	1.47e-38
WDFY3	0.432	2.12e-38
DPP8	0.431	2.35e-38
GLYR1	0.431	3.37e-38
NCOR1	0.431	2.48e-38
PIK3C2A	0.431	2.92e-38
PRRT2	0.431	2.44e-38
SLC26A1	0.431	2.75e-38
C1orf113	0.43	4.79e-38
POLK	0.43	3.67e-38
XIAP	0.43	4.6e-38
XPC	0.43	3.53e-38
ZNF442	0.43	4.1e-38
BHLHE40	0.429	6.22e-38
IQCH	0.429	5.58e-38
LOC441454	0.429	7.5e-38
PDCD6IP	0.429	6.01e-38
SENP7	0.429	8.05e-38
STK36	0.429	7.55e-38
TRPS1	0.429	6.57e-38
UBN2	0.429	7.02e-38
C19orf55	0.428	1.09e-37
NEK9	0.428	8.69e-38
C20orf94	0.427	1.27e-37
LOC115110	0.427	1.86e-37
RNF111	0.427	1.72e-37
ANKMY1	0.426	2.49e-37
AR	0.426	1.98e-37
ATP6AP1L	0.426	2.16e-37
C1orf152	0.426	2e-37
CCDC52	0.426	2.38e-37
MADD	0.426	1.97e-37
RAB30	0.426	1.91e-37
ZNF434	0.426	2.75e-37
MAPKBP1	0.425	4.13e-37
SFRS14	0.425	3.64e-37
WDR65	0.425	4e-37
ZNF791	0.425	3.89e-37
BBS1	0.424	5.43e-37
PGPEP1	0.424	6.49e-37
RALGPS1	0.424	4.55e-37
RERG	0.424	5.39e-37
SCUBE2	0.424	6.24e-37
SFRS2IP	0.424	4.54e-37
SLC39A6	0.424	4.49e-37
SUSD3	0.424	5.69e-37
SYNGAP1	0.424	6.76e-37
TTC23L	0.424	5.41e-37
UEVLD	0.424	6.06e-37
ZNF397	0.424	5.25e-37
ANKS1B	0.423	7.18e-37
DNAJC27	0.423	7.7e-37
FOXA1	0.423	7.22e-37
KIF3A	0.423	9.87e-37
LOC100271836	0.423	9e-37
MAP3K1	0.423	8.13e-37
PPP4R2	0.423	7.02e-37
REST	0.423	1.02e-36
STAG3L3	0.423	9.09e-37
LOC100130148	0.422	1.56e-36
ZNF33A	0.422	1.29e-36
CSNK1G1	0.421	1.8e-36
DDX17	0.421	2.08e-36
FRMPD2	0.421	2.16e-36
GATA3	0.421	2.32e-36
HTT	0.421	2.05e-36
KIAA2018	0.421	2.19e-36
RICTOR	0.421	1.94e-36
SNORD116-4	0.421	2.12e-36
ZSCAN20	0.421	2.17e-36
BSN	0.42	2.71e-36
CEP290	0.42	2.87e-36
FRYL	0.42	3.07e-36
HIP1	0.42	2.89e-36
WDR27	0.42	3.54e-36
ZNF396	0.42	3.65e-36
AKAP11	0.419	4.14e-36
FSCN2	0.419	5.04e-36
GNRHR	0.419	5.03e-36
N4BP2	0.419	4.51e-36
PARD3B	0.419	3.92e-36
ZNF197	0.419	4.41e-36
ZXDA	0.419	5.41e-36
CHIC1	0.418	6.89e-36
DOCK1	0.418	7.98e-36
IRS1	0.418	8.39e-36
OCLM	0.418	7e-36
RSC1A1	0.418	5.74e-36
TBC1D12	0.418	6.13e-36
TRIM44	0.418	5.9e-36
ZMYND10	0.418	6.95e-36
ZNF497	0.418	8.32e-36
CLK4	0.417	1.24e-35
KCNH1	0.417	1.15e-35
LOC200030	0.417	1.05e-35
MLPH	0.417	1.14e-35
NPEPPS	0.417	1.25e-35
PAR5	0.417	8.57e-36
SPDYE1	0.417	8.82e-36
SPIN3	0.417	9.48e-36
DNAH5	0.416	1.72e-35
IKBKB	0.416	1.83e-35
NBPF10	0.416	1.86e-35
SMARCC2	0.416	1.29e-35
UHMK1	0.416	1.64e-35
BCL2	0.415	2.23e-35
FAM193A	0.415	2.89e-35
GFRA1	0.415	2.1e-35
MLL5	0.415	2.47e-35
TAS2R3	0.415	2.1e-35
VPS13B	0.415	2.88e-35
ZC3H13	0.415	2.54e-35
ZNF568	0.415	1.94e-35
ZNF721	0.415	2.6e-35
C11orf42	0.414	4.12e-35
CHDH	0.414	3.39e-35
CP110	0.414	2.95e-35
CSNK1G3	0.414	2.95e-35
HTR7P1	0.414	3.33e-35
RNF123	0.414	3.38e-35
SLC22A5	0.414	3.78e-35
PLIN5	0.413	6.01e-35
TOM1L2	0.413	4.82e-35
TTC21A	0.413	6.1e-35
WDR11	0.413	4.97e-35
ZFYVE26	0.413	6.17e-35
ADCY1	0.412	6.89e-35
ANKRD30A	0.412	9.09e-35
CCDC125	0.412	9.29e-35
EXOC6	0.412	8.26e-35
KIAA0528	0.412	9.18e-35
KIAA1370	0.412	8.89e-35
MON2	0.412	7.74e-35
EFCAB6	0.411	1.45e-34
GPR81	0.411	1.17e-34
KIAA1598	0.411	1.23e-34
MAGI3	0.411	1.22e-34
MDM4	0.411	1.13e-34
SCAND2	0.411	1.43e-34
ST8SIA6	0.411	1.08e-34
APBB2	0.41	1.77e-34
FRS2	0.41	1.53e-34
GSTCD	0.41	1.8e-34
IGSF9B	0.41	2.13e-34
KIAA1328	0.41	1.52e-34
NF1	0.41	2.02e-34
NHLRC3	0.41	1.59e-34
ZFX	0.41	2.04e-34
ZNF169	0.41	1.66e-34
ZNF214	0.41	2.04e-34
BTBD8	0.409	2.6e-34
C5orf36	0.409	2.4e-34
NEK10	0.409	2.98e-34
PCBD2	0.409	3.11e-34
CDK17	0.408	3.86e-34
NBEAL1	0.408	4.33e-34
NBPF3	0.408	4.37e-34
RFX7	0.408	4.26e-34
RGS22	0.408	4.81e-34
ZNF655	0.408	4.01e-34
DICER1	0.407	6.83e-34
FAM178A	0.407	5.03e-34
GCC2	0.407	6.13e-34
GIPR	0.407	6.47e-34
KIAA0831	0.407	7.38e-34
LMX1B	0.407	6.72e-34
ANKRD31	0.406	8.73e-34
C14orf45	0.406	7.8e-34
CCDC158	0.406	7.59e-34
CNST	0.406	1.01e-33
ERBB2IP	0.406	8.96e-34
RBM47	0.406	9.06e-34
ZZEF1	0.406	9.65e-34
EP400	0.405	1.43e-33
FAM73A	0.405	1.43e-33
HAUS3	0.405	1.13e-33
HECTD2	0.405	1.13e-33
MPP7	0.405	1.51e-33
MYOF	0.405	1.32e-33
RCOR3	0.405	1.48e-33
LMBRD2	0.404	1.96e-33
RBM39	0.404	1.75e-33
TTC37	0.404	1.9e-33
UBXN10	0.404	1.74e-33
WDR93	0.404	2.35e-33
ZBTB41	0.404	2.18e-33
ZNF516	0.404	1.8e-33
AGBL2	0.403	3.25e-33
CCNT1	0.403	2.71e-33
CXorf23	0.403	3.58e-33
GLI3	0.403	3.08e-33
NUDT16	0.403	3.26e-33
PDZK1	0.403	3.54e-33
PHOSPHO2	0.403	2.93e-33
TMEM26	0.403	2.94e-33
ZFC3H1	0.403	3.05e-33
ZNF483	0.403	2.72e-33
ZNF585A	0.403	3.37e-33
CASC1	0.402	5.25e-33
FBXL2	0.402	3.87e-33
KIF27	0.402	4.32e-33
TAB3	0.402	5.17e-33
HIST4H4	0.401	6.19e-33
KIAA0141	0.401	7.08e-33
SEMA3B	0.401	7.71e-33
ZNF620	0.401	5.43e-33
CAPS2	0.4	8.65e-33
TRPM7	0.4	8.08e-33
WAPAL	0.4	9.65e-33
ZNF594	0.4	9.66e-33
GSTP1	-0.401	6.03e-33
NDUFA12	-0.401	7.38e-33
SCNM1	-0.401	6.22e-33
UBE2S	-0.401	7.8e-33
AHSA1	-0.402	4.53e-33
C2orf7	-0.402	4.67e-33
FAM100B	-0.402	4.85e-33
RPN1	-0.402	4.26e-33
CCT6A	-0.403	3.62e-33
MRPL37	-0.403	2.56e-33
NDUFB3	-0.403	3.49e-33
PSAT1	-0.403	2.69e-33
RALY	-0.403	3.14e-33
ADSL	-0.404	2.16e-33
SERPINH1	-0.404	2.32e-33
TUBB	-0.404	1.92e-33
C18orf21	-0.405	1.26e-33
ORC6L	-0.405	1.46e-33
ATP5E	-0.406	9.37e-34
CDK4	-0.406	9.57e-34
COX5B	-0.406	8.2e-34
GUK1	-0.406	1.01e-33
BUD31	-0.407	5.25e-34
C19orf50	-0.407	7.13e-34
EIF5B	-0.407	6.39e-34
FAM136A	-0.408	3.45e-34
GALNS	-0.408	3.53e-34
PRDX5	-0.408	3.99e-34
SRPRB	-0.408	4.93e-34
UXT	-0.408	4.69e-34
FSCN1	-0.409	2.85e-34
HSD17B10	-0.409	3.24e-34
C9orf16	-0.41	1.65e-34
CEBPB	-0.41	2.01e-34
GNG5	-0.41	2e-34
HAPLN3	-0.41	1.58e-34
CCNE1	-0.411	1.29e-34
CPNE2	-0.411	1.3e-34
MRPS9	-0.411	1.43e-34
UBE2C	-0.411	1.39e-34
CTU2	-0.412	7.63e-35
ENO1	-0.412	8.18e-35
HMGA1	-0.412	7.41e-35
ITGB1BP1	-0.412	8.23e-35
C6orf129	-0.413	4.43e-35
PSMA2	-0.413	6.46e-35
SSBP1	-0.413	6.34e-35
BANF1	-0.414	3.21e-35
CCDC90A	-0.414	2.97e-35
CDC20	-0.414	4.13e-35
MRPS17	-0.414	3.59e-35
PPIA	-0.414	3.91e-35
PPPDE2	-0.414	3.53e-35
UQCR10	-0.414	3.3e-35
FAM127A	-0.415	2.23e-35
GAPDH	-0.415	2.1e-35
PPM1G	-0.415	2.87e-35
DGUOK	-0.416	1.92e-35
FAM54A	-0.416	1.45e-35
MGC72080	-0.416	1.33e-35
NDUFA9	-0.416	1.76e-35
FTL	-0.417	9.73e-36
CYCS	-0.418	7.23e-36
DDOST	-0.418	7.32e-36
MEMO1	-0.418	5.9e-36
NDUFB11	-0.418	8.11e-36
ATP5L	-0.419	4.5e-36
C6orf153	-0.419	4.74e-36
HDDC2	-0.419	3.84e-36
NUDT5	-0.419	3.83e-36
NUDT8	-0.419	5.48e-36
PSMC1	-0.419	4.97e-36
TMEM208	-0.419	5.25e-36
ZBTB8OS	-0.419	3.97e-36
ABT1	-0.42	2.88e-36
CBR3	-0.42	2.81e-36
LAD1	-0.42	2.67e-36
NOP10	-0.42	2.99e-36
PTMA	-0.42	2.86e-36
AVEN	-0.421	2.08e-36
ACOT9	-0.422	1.39e-36
HSPE1	-0.422	1.53e-36
FAM127C	-0.423	6.94e-37
MYL12A	-0.423	7.14e-37
TALDO1	-0.423	8.61e-37
MRPL2	-0.424	5.53e-37
CSNK2B	-0.425	3.16e-37
ERP44	-0.425	3.76e-37
GPI	-0.425	4.15e-37
HEBP2	-0.425	3.67e-37
RPS7	-0.425	3.38e-37
TBPL1	-0.425	3.68e-37
TXN	-0.426	2.06e-37
MFSD2B	-0.427	1.31e-37
PDCL3	-0.427	1.28e-37
PIR	-0.427	1.42e-37
C19orf43	-0.428	8.77e-38
PSMA3	-0.428	8.43e-38
ARPC5L	-0.429	6.77e-38
NUDT1	-0.43	4.2e-38
PHF5A	-0.43	5.18e-38
C20orf24	-0.431	3.2e-38
RAP2B	-0.431	2.29e-38
EPCAM	-0.432	1.74e-38
PDHA1	-0.432	2.05e-38
SEC13	-0.433	1.16e-38
ATP1B3	-0.434	8.43e-39
FAM98A	-0.435	5.73e-39
MRPL18	-0.435	4.25e-39
RPF2	-0.435	4e-39
TOMM22	-0.435	5.68e-39
CKLF	-0.436	2.78e-39
PSMB5	-0.436	2.61e-39
DDX39	-0.437	1.82e-39
NDUFA6	-0.437	1.8e-39
RPP40	-0.437	1.9e-39
SRM	-0.437	1.87e-39
PFDN2	-0.439	1.01e-39
S100A11	-0.439	6.7e-40
PSMB4	-0.44	4.83e-40
C16orf80	-0.441	3.37e-40
C9orf30	-0.441	3.13e-40
LSM6	-0.442	2.03e-40
MRPL11	-0.442	2.15e-40
MRPS24	-0.442	2.01e-40
PLOD1	-0.442	1.88e-40
PSMA7	-0.443	1.35e-40
PSMB1	-0.443	1.16e-40
CSTB	-0.444	7.26e-41
FAM127B	-0.444	1.01e-40
SNRPC	-0.444	1.06e-40
CALR	-0.445	5e-41
KCMF1	-0.445	5.66e-41
TUBA1C	-0.445	6.68e-41
OST4	-0.446	3.07e-41
SEC61G	-0.446	4.37e-41
ACTR3	-0.447	2.41e-41
BID	-0.447	2.62e-41
LSM10	-0.447	2.07e-41
SNX3	-0.447	2.33e-41
PSMB2	-0.448	1.34e-41
RPP21	-0.448	1.19e-41
SNRPF	-0.448	1.52e-41
ALG3	-0.449	7.38e-42
COX5A	-0.449	7.73e-42
COX6B1	-0.449	7.89e-42
ACTB	-0.451	3.36e-42
PTTG1	-0.451	3.31e-42
SF3B14	-0.451	2.97e-42
TMEM189	-0.452	2.17e-42
PDSS1	-0.453	1.73e-42
PSMB7	-0.453	1.16e-42
SF3B5	-0.453	1.43e-42
CHAC1	-0.455	5.11e-43
HN1	-0.456	2.83e-43
C12orf45	-0.457	2.4e-43
COX4NB	-0.457	1.9e-43
GARS	-0.458	1.57e-43
MRPS5	-0.459	8.61e-44
TXNDC12	-0.459	6.74e-44
CDC123	-0.46	5.69e-44
PFN1	-0.462	1.71e-44
CFL1	-0.463	1.03e-44
PSMD14	-0.463	1.47e-44
RANBP1	-0.463	1.48e-44
PSMG1	-0.464	9.06e-45
C11orf10	-0.465	5.45e-45
MRPS15	-0.465	4.16e-45
NAA10	-0.465	4.06e-45
SNRPA1	-0.465	5.31e-45
TOMM5	-0.466	3.52e-45
MDH1	-0.467	1.94e-45
PPIB	-0.468	9.75e-46
FAM89B	-0.469	7.95e-46
KARS	-0.469	7.17e-46
TBC1D7	-0.47	4.75e-46
UFD1L	-0.47	3.88e-46
UTP11L	-0.47	3.22e-46
ATP5C1	-0.472	1.73e-46
PRDX4	-0.474	5.65e-47
PSMA4	-0.474	5.75e-47
C16orf57	-0.475	3.29e-47
MAGOH	-0.475	2.97e-47
POLR2F	-0.475	3.2e-47
SHFM1	-0.475	4.12e-47
PDCD5	-0.476	1.55e-47
BRI3	-0.477	1.39e-47
C11orf75	-0.479	3.97e-48
COX7B	-0.48	3.13e-48
LSM2	-0.481	2.01e-48
MED27	-0.486	1.53e-49
FKBP1A	-0.49	1.83e-50
FAM96B	-0.491	7.95e-51
NDUFS5	-0.492	4.3e-51
PPP1R14B	-0.494	1.92e-51
ATP5G3	-0.495	1.16e-51
DNAJB11	-0.496	4.68e-52
CDK2AP1	-0.497	3.21e-52
ECE2	-0.499	1.01e-52
SEC61B	-0.501	4.22e-53
GTF3C6	-0.502	2.88e-53
SH3BGRL3	-0.502	2.41e-53
COX4I1	-0.504	8.01e-54
CENPW	-0.506	2.02e-54
C6orf115	-0.507	1.78e-54
BOLA3	-0.51	3.23e-55
NUTF2	-0.515	1.63e-56
TMSB10	-0.515	1.86e-56
UQCRHL	-0.518	2.52e-57
FAM58A	-0.522	2.23e-58
MRPL47	-0.526	2.58e-59
C16orf61	-0.536	4.47e-62
SNRPG	-0.542	1.43e-63
YBX1	-0.549	1.36e-65
UQCRH	-0.557	6.74e-68
